# Supplementary material for: Cytoplasmic mRNA decay represses RNA polymerase II transcription during early apoptosis
Source: eLife. 2021 Jun 4;10:e58342. doi: 10.7554/eLife.58342 (PMC8192121; doi:10.7554/eLife.58342)
Supplement: Figure 2—source data 1. — (A) Differential 4sU-labeled transcript expression values (averaged across two replicates and normalized to ERCC spike-ins) upon 2 hr TRAIL treatment with 1 hr DMSO (vehicle) pre-treatment. Includes gene, transcript identifiers, and RefSeq annotations. (B) Differential 4sU-labeled transcript expression values (averaged across two replicates and normalized to ERCC spike-ins) upon 2 hr TRAIL treatment with 1 hr zVAD pre-treatment. Includes gene, transcript identifiers, and RefSeq annotations. (C) GO enrichment anaylsis for subset of genes represented in the transcripts upregulated >2 fold upon TRAIL treatment (with 1 hr DMSO pre-treatment). Only statistically significant (FDR < 0.05) enrichments are listed. (D) Transcription factor enrichment analysis for subset of genes represented in the transcripts upregulated >2 fold upon TRAIL treatment (with 1 hr DMSO pre-treatment). [file elife-58342-fig2-data1.xlsx]

## Sheet: Figure 2 - Source data 1A
Accession	Gene	normalized FKPM (no TRAIL)	log2(fold change)	-log10p	RefSeq Annotation
NR_027177	C17orf76-AS1	2.17593e-235	765.63	0	lncRNA
NM_001142282	RPS24	4.03777e-291	758.573	0	protein_coding
NR_027174	C17orf76-AS1	1.7115e-231	754	0.42934	lncRNA
NM_032379	SYTL2	2.90651e-216	698.747	0	unannotated_transcripts
NM_018915	PCDHGA2	1.40907e-207	646.519	0	protein_coding
NM_018916	PCDHGA3	4.81336e-199	613.403	0	protein_coding
NM_001252273	FAM69A	1.04052e-201	575.567	0	protein_coding
NR_027500	BCDIN3D-AS1	7.49654e-157	500.699	0	lncRNA
NM_001002812	PDE4DIP	5.89573e-156	454.01	0	protein_coding
NM_001204886	RAB43	5.15649e-146	443.574	0	protein_coding
NM_001204883	RAB43	3.92667e-144	437.696	0	protein_coding
NM_001146310	C1orf86	3.41182e-136	433.97	0	processed_transcript
NM_001204884	RAB43	1.27197e-142	432.978	0	protein_coding
NM_001204885	RAB43	2.32638e-141	429.035	0	protein_coding
NR_046427	C1orf86	1.64682e-131	419.18	0	nonsense_mediated_decay
NM_207042	ENSA	3.45156e-128	400.964	0	protein_coding
NM_001258403	SLC4A8	1.87182e-124	395.937	0	protein_coding
NM_032974	CASP10	2.47808e-124	394.52	0	protein_coding
NM_001164551	DISC1	2.09142e-134	383.424	0	protein_coding
NM_001267550	TTN	2.06355e-120	378.857	0	protein_coding
NM_001199345	RPL17	2.83672e-120	359.562	0	protein_coding
NM_001170783	FAM122C	2.88911e-112	358.228	0.461615	protein_coding
NM_001204871	URGCP-MRPS24	1.35613e-111	353.416	0	protein_coding
NM_172374	IL4I1	1.25706e-111	350.701	0	protein_coding
NM_207045	ENSA	8.87686e-109	345.18	0	protein_coding
NR_028400	TSNAX-DISC1	1.17198e-108	341.349	0	nonsense_mediated_decay
NM_018925	PCDHGB5	2.36026e-126	326.413	0	protein_coding
NM_001206542	CASP10	7.50445e-103	325.568	0	protein_coding
NM_001267565	CREM	1.52876e-149	319.604	0	processed_transcript
NR_047577	IL4I1	2.4025e-112	318.44	0	nonsense_mediated_decay
NM_001168325	TESC	1.8686e-100	314.746	0	protein_coding
NR_037655	BLOC1S1	5.24459e-98	311.438	0.496959	nonsense_mediated_decay
NM_001199356	RPL17-C18orf32	3.70031e-103	309.51	0	protein_coding
NM_001164549	DISC1	5.51413e-96	301.279	0	protein_coding
NR_073543	MOK	5.58553e-95	300.338	0.437113	protein_coding
NM_001260512	MGST1	5.9232e-95	299.455	0	protein_coding
NR_073542	MOK	1.11815e-97	297.662	0	protein_coding
NM_001258018	IL4I1	8.21139e-113	297.53	0	protein_coding
NR_073541	MOK	5.82258e-101	294.433	0	protein_coding
NM_001202509	CKLF-CMTM1	4.86125e-91	288.854	0.43646	protein_coding
NM_133378	TTN	3.47806e-91	279.496	0	protein_coding
NM_201264	NRP2	4.09018e-88	272.94	0	protein_coding
NM_001276311	NOL3	2.0087e-86	271.994	0.436994	protein_coding
NR_003189	SYS1-DBNDD2	2.56243e-86	268.704	0	nonsense_mediated_decay
NM_001256850	TTN	5.49334e-102	261.539	0	protein_coding
NR_040056	IQCH-AS1	1.08177e-81	257.369	0.311981	unannotated_transcripts
NM_001131010	SATB1	7.06354e-90	255.362	0	protein_coding
NR_045023	C17orf76-AS1	9.31914e-142	250.003	0	lncRNA
NM_001144951	GLYCTK	7.08995e-99	249.503	0	protein_coding
NM_001204098	CKLF-CMTM1	1.29308e-95	248.34	0	protein_coding
NM_001003680	LEPR	2.6398e-79	244.403	0	protein_coding
NM_001257325	APBB1	2.7846e-89	241.666	0	protein_coding
NM_001197234	BTN2A1	4.04426e-77	238.955	0	protein_coding
NM_001267868	HSD11B1L	3.29903e-76	234.847	0	protein_coding
NM_001257319	APBB1	1.34229e-91	233.905	0	protein_coding
NM_001267566	CREM	1.28874e-74	231.46	0	unannotated_transcripts
NM_001257320	APBB1	4.918e-93	229.147	0	protein_coding
NM_003759	SLC4A4	2.32613e-74	222.04	0	protein_coding
NM_001160389	TRPT1	4.67947e-72	221.241	0	protein_coding
NR_037192	ABHD14A-ACY1	2.43026e-76	218.543	0	unannotated_transcripts
NM_001199355	RPL17-C18orf32	4.02157e-70	214.53	0	protein_coding
NM_001256304	DTNB	2.04371e-68	213.023	0.443517	protein_coding
NR_051972	CREM	3.52013e-73	212.85	0	unannotated_transcripts
NM_001267570	CREM	1.4285e-72	212.611	0	protein_coding
NM_182724	CREM	2.14631e-69	211.351	0	protein_coding
NM_001164555	DISC1	1.28132e-119	208.611	0	nonsense_mediated_decay
NM_001130091	LRRC48	5.24234e-76	206.263	0	protein_coding
NM_138320	PCSK6	8.68188e-70	202.355	0	unannotated_transcripts
NM_138321	PCSK6	2.14345e-66	201.949	0	unannotated_transcripts
NM_001271846	TBC1D16	1.45925e-65	201.695	0	protein_coding
NM_001083964	TDRKH	6.97539e-63	192.648	0	protein_coding
NM_207043	ENSA	4.24718e-68	183.539	0	protein_coding
NM_001170689	MIB2	3.10348e-57	175.913	0.604499	protein_coding
NR_033808	CYP3A5	1.51365e-58	175.478	0	unannotated_transcripts
NM_001098624	MID1	6.74523e-90	173.284	0	protein_coding
NR_027646	ATP1A1OS	1.14653e-57	173.063	0	lncRNA
NM_001276394	LDLRAD1	1.08185e-57	172.937	0	protein_coding
NR_045039	SMUG1	2.98404e-56	170.153	0	unannotated_transcripts
NM_001168340	TTC39B	2.369e-62	168.836	0	protein_coding
NM_001261386	UEVLD	1.38858e-58	168.108	0	protein_coding
NM_001242489	FAM156A	5.06062e-103	166.237	0	protein_coding
NM_001242491_1	FAM156A	9.21959e-102	165.579	0	unannotated_transcripts
NM_001242492	FAM156A	6.25967e-99	164.1	0	protein_coding
NM_001099684	FAM156B	1.61123e-92	160.752	0	protein_coding
NM_001242495	FAM156A	2.77074e-92	160.629	0	protein_coding
NM_001242497	FAM156A	5.94445e-89	158.89	0	protein_coding
NM_001204505	DGKH	1.03496e-63	155.564	0	protein_coding
NM_001204506	DGKH	1.08106e-59	155.255	0	protein_coding
NM_001256026	ARHGAP22	2.29916e-52	155.231	0	protein_coding
NR_027175	C17orf76-AS1	1.0701e-50	154.118	0.377993	lncRNA
NM_172197	AGER	2.12756e-50	151.54	0	protein_coding
NM_181700	PPP2R1B	9.18501e-51	149.113	0	protein_coding
NM_033290	MID1	2.77559e-79	149.091	0	protein_coding
NM_181269	CMTM1	1.62879e-81	147.292	0	protein_coding
NR_046288	LOC100289092	2.84895e-49	146.414	0	lncRNA
NM_001204299	ZNF664-FAM101A	2.59535e-56	145.105	0	protein_coding
NR_037930	SLMO2-ATP5E	1.33737e-63	145.1	0	unannotated_transcripts
NM_001131017	CIZ1	1.64436e-48	143.746	0	protein_coding
NR_028396	TSNAX-DISC1	1.5846e-48	143.574	0	nonsense_mediated_decay
NM_001136042	PTGES3L-AARSD1	1.32962e-47	141.465	0	protein_coding
NM_181271	CMTM1	5.97862e-47	139.059	0	protein_coding
NM_001145146_1	CRHR1	5.88088e-51	137.761	0	unannotated_transcripts
NM_001164712	AMT	5.65358e-46	136.57	0	protein_coding
NM_052836	CDH23	1.1689e-46	135.827	0	protein_coding
NM_001168485	ARMCX5	3.43124e-46	135.657	0	protein_coding
NR_046320	GPX2	1.1749e-90	135.393	0	nonsense_mediated_decay
NR_046321	GPX2	2.79386e-90	134.787	0	nonsense_mediated_decay
NM_001012633	IL32	4.20391e-49	132.67	0	protein_coding
NR_037188	CPNE1	1.71541e-44	129.89	0	protein_coding
NR_028398	TSNAX-DISC1	1.83414e-64	129.744	0	nonsense_mediated_decay
NM_024553	CCDC132	1.58402e-44	129.707	0	protein_coding
NM_178425	HDAC9	1.5466e-44	128.549	0	protein_coding
NR_038260	HIVEP3	5.40765e-44	127.66	0	processed_transcript
NM_001271069	MAX	6.95487e-135	126.103	0	protein_coding
NM_001164545	DISC1	1.92434e-61	126.041	0	protein_coding
NM_001437	ESR2	1.23599e-43	125.462	0	protein_coding
NM_001256736	SSBP2	6.23088e-43	125.12	0	protein_coding
NM_001167992	PQBP1	2.03794e-43	125.021	0	protein_coding
NM_178423	HDAC9	8.22853e-47	124.932	0	protein_coding
NR_045021	C17orf76-AS1	9.34019e-116	124.518	0	lncRNA
NM_001272105	PAQR6	6.89737e-43	123.677	0	protein_coding
NM_207040	TCF12	2.93388e-78	121.837	0	protein_coding
NM_053031	MYLK	9.08956e-42	121.813	0	protein_coding
NM_001271910	C16orf55	4.2538e-42	121.521	0	protein_coding
NM_001270462	ST3GAL3	2.13823e-52	120.938	0	protein_coding
NR_072998	PTK7	7.98601e-42	120.639	0	nonsense_mediated_decay
NM_001135049	JDP2	2.0352e-40	119.342	0.611366	protein_coding
NM_001193289	APOBEC3A_B	1.01635e-92	119.158	0	protein_coding
NR_033809	CYP3A5	6.33627e-53	117.502	0	unannotated_transcripts
NM_198681	PLEKHG5	4.17582e-39	113.443	0	protein_coding
NM_001001935	ATP5A1	1.51595e-39	113.369	0	protein_coding
NR_026547	C21orf90	5.80186e-43	113.246	0	lncRNA
NR_033670	ARMCX6	2.42619e-54	112.061	0	protein_coding
NR_045493	LSM1	1.59547e-39	112.06	0	processed_transcript
NM_001005374	LRSAM1	4.6001e-42	111.05	0	protein_coding
NM_001242822	DEF8	6.77568e-38	110.983	0.432856	protein_coding
NM_001260496	RDX	1.08873e-37	109.338	0	protein_coding
NM_001204422	RGS6	5.48112e-40	108.064	0	protein_coding
NM_001258426	SLC4A9	7.29969e-38	107.232	0	protein_coding
NM_199203	TMEM189-UBE2V1	4.35112e-54	106.248	0	protein_coding
NM_001136	AGER	2.87027e-42	105.285	0	protein_coding
NM_178850	HNF4A	2.73954e-50	104.825	0	protein_coding
NM_001256870	POLD4	3.49179e-36	104.755	0.441112	protein_coding
NM_001204293	MUC1	6.28727e-36	104.57	0.435097	protein_coding
NM_013959	NRG1	3.37067e-37	104.197	0	protein_coding
NM_001270522	MED23	4.10213e-39	103.656	0	protein_coding
NM_001033083	PBLD	2.17121e-36	103.514	0	protein_coding
NM_001142550	WDR47	2.24832e-38	103.36	0	protein_coding
NM_001257398	UBE2V1	7.47884e-36	101.968	0	protein_coding
NM_031467	SLC4A9	1.77642e-38	101.882	0	protein_coding
NM_001206932_3	AGER	1.21922e-39	101.318	0	unannotated_transcripts
NM_001257334	ATP5A1	2.2442e-40	100.49	0	protein_coding
NM_001252151	SLC39A9	4.33502e-36	100.274	0	protein_coding
NR_027069	LOC100132215	1.66076e-47	99.9459	0	lncRNA
NM_001206929_2	AGER	3.57825e-45	98.5383	0	unannotated_transcripts
NM_001271876	ESR2	7.64107e-36	98.3685	0	protein_coding
NR_037641	HEATR8-TTC4	1.97074e-42	97.857	0	nonsense_mediated_decay
NM_017411	SMN2	4.27482e-45	96.5873	0	protein_coding
NM_001164548	DISC1	3.8925e-49	95.7782	0	protein_coding
NM_001174083	NLRP2	6.32842e-37	95.0907	0	protein_coding
NM_001164761	PRKAR1B	1.72081e-42	94.7225	0	protein_coding
NM_001255989	COLEC11	1.22309e-33	94.4813	0	protein_coding
NM_001164544	DISC1	1.52828e-46	93.3602	0	protein_coding
NM_001177638	DAG1	2.8152e-34	93.2117	0	protein_coding
NM_001177641	DAG1	5.86314e-34	93.075	0	protein_coding
NM_001243014	ABCB9	5.01759e-53	92.787	0	protein_coding
NM_001204221	ZNF695	5.99144e-33	92.7865	0	protein_coding
NM_001160393	TRPT1	1.47082e-32	92.6393	0.437113	protein_coding
NM_001199142_1	EIF3C	3.24389e-33	92.4431	0	unannotated_transcripts
NM_000344	SMN1	1.66316e-43	92.2896	0	protein_coding
NM_001270466	ST3GAL3	3.09156e-33	91.6283	0	protein_coding
NM_001204364	FAM24B	1.37247e-32	91.3798	0	protein_coding
NM_007171	POMT1	1.08818e-35	91.008	0	protein_coding
NM_001255987	COLEC11	2.38714e-37	90.2418	0	protein_coding
NM_001255988	COLEC11	2.38714e-37	90.2418	0	protein_coding
NM_201430	RTN3	3.10939e-32	89.9958	0	protein_coding
NR_046372	P2RX4	4.35033e-32	88.9184	0	nonsense_mediated_decay
NM_001164283	TRAF3IP2	7.57655e-93	88.6683	0	protein_coding
NM_001164383	STAU2	1.04509e-31	87.7364	0	protein_coding
NM_000777	CYP3A5	5.81155e-46	87.4807	0	protein_coding
NM_001255986	COLEC11	7.59043e-41	86.5427	0	protein_coding
NM_001242917	ZFAND6	2.68705e-31	86.473	0	protein_coding
NM_001271877	ESR2	1.9954e-31	85.4916	0	protein_coding
NM_001163148	ETV1	7.26643e-38	85.1447	0	protein_coding
NM_001128844	SMARCA4	6.21245e-40	84.6517	0	protein_coding
NM_018904	PCDHA13	8.23524e-32	84.5553	0	protein_coding
NM_001257397	UBE2V1	6.61849e-31	84.1809	0	protein_coding
NR_024117	MSTO2P	1.14291e-30	84.0597	0	unprocessed_pseudogene
NM_001163149	ETV1	1.20295e-33	83.6281	0	protein_coding
NM_001204054	NDUFC2	1.39037e-48	83.492	0	protein_coding
NM_001128144	PMS1	1.50911e-30	83.456	0	protein_coding
NM_133486	MBNL3	1.56949e-39	83.3436	0	protein_coding
NM_001163121	RDM1	2.8841e-30	83.1212	0	protein_coding
NR_002582	SNORA7A	3.76147e-55	83.0167	0	snoRNA
NM_001270451	UBE3B	3.52922e-45	82.8218	0	protein_coding
NM_001077365	POMT1	7.31935e-31	82.7845	0	protein_coding
NM_201629	TJP2	9.64528e-32	82.6284	0	protein_coding
NM_001130083	ABLIM2	1.74047e-35	82.3795	0	protein_coding
NM_001242904	MPPE1	1.98284e-30	82.3541	0	protein_coding
NM_199179	KIRREL2	1.90567e-29	81.8303	0	protein_coding
NR_040049	SDCBP2-AS1	4.86114e-69	81.612	0	lncRNA
NM_003732	EIF4EBP3	5.93977e-30	81.2173	0	protein_coding
NM_001199120_2	RPP21	2.74768e-29	81.0463	0	unannotated_transcripts
NM_001163813	C10orf2	1.4545e-29	80.9626	0	protein_coding
NR_033691	C1orf213	2.46031e-32	80.3065	0	lncRNA
NR_024132	GHRL	3.67151e-74	79.8243	0	unannotated_transcripts
NR_024137	GHRL	7.20901e-74	79.4743	0	unannotated_transcripts
NM_001177637	DAG1	8.41515e-32	79.3075	0	protein_coding
NM_002735	PRKAR1B	1.69051e-37	79.2406	0	protein_coding
NM_001276309	NOL3	2.01467e-78	78.7434	0	protein_coding
NM_001271164	PTGS1	8.04127e-29	78.1079	0	protein_coding
NM_004382	CRHR1	3.12356e-32	77.6522	0	protein_coding
NM_001163814	C10orf2	8.17572e-30	77.6388	0	protein_coding
NM_001002810	PDE4DIP	1.62958e-28	77.5447	0	protein_coding
NM_001257401	CD63	2.1749e-27	77.495	0.439316	protein_coding
NM_002606	PDE9A	2.86733e-28	77.4839	0	protein_coding
NM_174968	ST3GAL3	2.21254e-48	77.3464	0	protein_coding
NM_001146113	MIER1	1.09396e-27	77.2683	0.440752	protein_coding
NR_027684	RPAIN	1.01367e-28	77.1894	0	nonsense_mediated_decay
NR_051978	TBC1D2	1.36961e-27	77.1151	0.604324	protein_coding
NM_001267607	ZNF248	1.5935e-31	76.3039	0	protein_coding
NM_182719	CREM	1.35101e-62	76.2265	0	protein_coding
NM_001270395	PKIB	5.11561e-33	75.6338	0	protein_coding
NM_182718	CREM	3.79258e-59	75.554	0	protein_coding
NM_001145055	IL18BP	1.52096e-37	75.5147	0	protein_coding
NM_006123	IDS	1.87361e-28	75.439	0	protein_coding
NM_001256426	PDLIM5	2.94238e-28	75.3244	0	protein_coding
NM_001256155	ARMCX4	1.50994e-29	75.1794	0	protein_coding
NR_028468	ATXN3	6.56604e-43	75.0633	0	nonsense_mediated_decay
NM_001267709	ZNF706	2.31186e-27	72.6478	0	protein_coding
NM_003915	CPNE1	9.33507e-57	72.5378	0	protein_coding
NM_001164762	PRKAR1B	2.48758e-35	72.5177	0	protein_coding
NM_001163321	CCDC120	3.68428e-27	71.9069	0	protein_coding
NM_001256621	R3HCC1L	2.39096e-26	71.8635	0	protein_coding
NM_001204355	SPOCK3	7.97472e-31	71.8156	0	protein_coding
NM_001020825	NR3C1	1.25497e-26	71.6511	0	protein_coding
NM_001204055	NDUFC2	1.44541e-26	71.5632	0	protein_coding
NM_174887	IFT20	5.01157e-27	71.4927	0	protein_coding
NM_001162951	SYTL2	3.58444e-26	70.8729	0	protein_coding
NM_001200050	NPL	2.1586e-27	70.3856	0	protein_coding
NM_001242674	AHCYL1	1.34813e-31	70.0704	0	protein_coding
NM_001001570	PDE9A	2.22584e-38	69.8223	0	protein_coding
NR_034122	LOC100131067	6.97264e-36	69.6948	0	lncRNA
NM_001204353	SPOCK3	1.59977e-29	69.4734	0	protein_coding
NM_001135154	SLC39A14	3.21752e-26	68.4482	0	protein_coding
NM_001261442	EXTL2	4.64061e-25	68.3576	0.607655	protein_coding
NR_073577	USP10	2.8913e-26	68.345	0	nonsense_mediated_decay
NM_182721	CREM	8.06894e-26	68.2586	0	protein_coding
NR_024510_1	LINC00623	3.36297e-91	68.1198	0	unannotated_transcripts
NR_028397	TSNAX-DISC1	6.83972e-26	67.8903	0	nonsense_mediated_decay
NR_051973	CREM	8.29193e-32	67.6789	0	unannotated_transcripts
NM_001256186	SNX12	1.26174e-24	67.6012	0.462244	protein_coding
NM_001082487	ACD	3.06002e-25	67.1851	0	unannotated_transcripts
NM_031411	PCDHA1	8.89697e-26	66.2533	0	protein_coding
NM_001185090	GRIN1	1.08164e-32	66.0569	0	protein_coding
NR_049751	RTN3	6.82125e-29	65.1252	0	nonsense_mediated_decay
NM_001018005	TPM1	4.36745e-34	64.9982	0	protein_coding
NM_001135168	ALDH3A1	9.74744e-30	64.9686	0	protein_coding
NR_073084	CRIP2	3.54607e-25	64.8383	0	processed_transcript
NM_001258310	NOP2	5.35148e-25	64.8309	0	protein_coding
NM_001244364	ARHGEF28	3.0231e-24	64.4139	0	protein_coding
NM_001017530	PRR5	1.98629e-24	64.3992	0	protein_coding
NM_001195432	MLF1	1.26242e-24	64.0546	0	protein_coding
NM_001261838	PTER	2.90534e-25	63.8396	0	protein_coding
NM_001201472	CORO7	5.04763e-29	63.4596	0	protein_coding
NM_001271836	CCDC120	6.12423e-24	63.4144	0	protein_coding
NM_001204834	ANO10	2.12015e-51	62.6503	0	protein_coding
NM_001006941	ALG3	2.04727e-24	62.6334	0	protein_coding
NM_006279	ST3GAL3	1.53592e-33	62.4267	0	protein_coding
NM_212474	FN1	5.94135e-24	62.3783	0	protein_coding
NR_037929	SLMO2-ATP5E	1.53e-23	62.2996	0	unannotated_transcripts
NR_037909	ARHGAP19-SLIT1	3.79837e-41	62.1999	0	nonsense_mediated_decay
NM_001243725	TEX264	3.04757e-23	62.1628	0.439496	protein_coding
NM_001204451	CCPG1	8.63029e-38	61.9571	0	protein_coding
NM_032468	ASPH	3.71802e-23	61.9095	0.456801	protein_coding
NM_207102	FBXW12	5.36059e-28	61.8218	0	protein_coding
NM_001160116	C15orf40	8.54756e-30	61.517	0	protein_coding
NM_001258292	NFATC2	1.29178e-23	61.4357	0	protein_coding
NM_001270460	ST3GAL3	3.13945e-38	61.1467	0	protein_coding
NM_030932	DIAPH3	1.70906e-51	61.1423	0	protein_coding
NM_001039966	GPER	9.84719e-30	61.0018	0	protein_coding
NR_027172	C17orf76-AS1	6.05298e-61	60.5436	0	lncRNA
NM_001244963	NAV2	4.28007e-41	60.3821	0	protein_coding
NM_001142339	GNAL	1.70249e-29	60.3049	0	protein_coding
NM_001270459	ST3GAL3	4.69055e-34	60.175	0	protein_coding
NM_001206985	METTL23	7.92347e-23	60.1309	0	protein_coding
NM_001244567	BID	9.5096e-30	59.8129	0	protein_coding
NM_001276347	TNNT2	4.43465e-23	59.7838	0	protein_coding
NM_001164752	ASPH	2.5299e-29	59.5183	0	protein_coding
NM_013439	PILRA	1.17899e-22	59.361	0	protein_coding
NM_174971	ST3GAL3	8.83823e-46	59.0202	0	protein_coding
NM_001040666	STEAP2	3.85551e-27	59.0001	0	protein_coding
NM_001198530	TCF7L2	1.48766e-31	58.7989	0	protein_coding
NM_001142595	P4HA1	4.1055e-26	58.7952	0	protein_coding
NM_001160390	TRPT1	7.2653e-23	58.5115	0	protein_coding
NM_001251967	SPOCK3	2.49759e-23	58.3183	0	protein_coding
NM_016725	FOLR1	7.22811e-23	58.0004	0	protein_coding
NM_001199664	PMF1-BGLAP	2.28206e-36	57.9717	0	protein_coding
NM_012219	MRAS	4.05518e-33	57.8376	0	protein_coding
NM_001164547	DISC1	2.47709e-23	57.355	0	protein_coding
NR_046112	LOC440894	3.69731e-118	56.4105	0	unannotated_transcripts
NM_001127701	SERPINA1	7.77965e-30	56.4033	0	protein_coding
NM_001256239	PGAP2	2.39146e-28	55.8766	0	protein_coding
NR_040088	SETD4	6.50418e-35	55.6648	0	unannotated_transcripts
NM_001160354	LY6K	9.94032e-23	55.5936	0	protein_coding
NM_001244946	STEAP2	2.34516e-22	55.5281	0	protein_coding
NM_001164502	EIF4ENIF1	2.64363e-21	55.4922	0.446299	protein_coding
NM_001204099	CKLF-CMTM1	8.45306e-29	55.474	0	protein_coding
NM_130803	MEN1	1.11037e-21	55.2737	0	protein_coding
NM_001257323	APBB1	1.28331e-37	55.2677	0	protein_coding
NM_001002261	ZFYVE27	5.36724e-23	55.0884	0	protein_coding
NM_001242500	MIF4GD	9.34327e-22	55.0181	0	protein_coding
NM_001164550	DISC1	1.03123e-28	54.9318	0	unannotated_transcripts
NM_001001567	PDE9A	3.01094e-21	54.7864	0	protein_coding
NR_073556	CDK5RAP2	5.87349e-33	54.7245	0	nonsense_mediated_decay
NM_001258246	TMEM218	3.56838e-21	54.0747	0	protein_coding
NM_001166285	CCT7	8.61931e-22	53.939	0	protein_coding
NM_001193286	SIRT2	4.36044e-21	53.8916	0	protein_coding
NR_033329	KLHL7	3.01344e-20	53.809	0.608712	protein_coding
NM_148966	TNFRSF25	3.08436e-37	53.7273	0	protein_coding
NM_001242393	ACSS2	7.26596e-22	53.5899	0	protein_coding
NM_181571	CREM	2.97236e-34	53.533	0	protein_coding
NR_024577	SEC61A2	1.75982e-21	53.4332	0	processed_transcript
NR_073138	MAX	3.8304e-20	53.2955	0.440452	unannotated_transcripts
NM_172210	CSF1	6.89084e-21	52.9615	0	protein_coding
NM_201545	LGALS8	9.86321e-21	52.9038	0	protein_coding
NM_001242920	PLTP	9.0177e-30	52.863	0	protein_coding
NM_182771	CREM	4.96595e-30	52.7829	0	protein_coding
NM_001130483	VRK2	2.95457e-21	52.5864	0	protein_coding
NM_001005290	PSRC1	2.91186e-20	52.5435	0.598513	protein_coding
NM_015247	CYLD	2.91227e-35	52.5236	0	protein_coding
NM_001198901	YY1AP1	1.53037e-20	52.4481	0	protein_coding
NM_032979	DTNA	7.71456e-25	52.3782	0	protein_coding
NM_001002236	SERPINA1	1.69624e-28	52.3653	0	protein_coding
NR_027997	RDM1	3.46013e-27	52.1908	0	protein_coding
NR_033678	CARD8	4.38848e-21	52.1051	0	nonsense_mediated_decay
NR_037169_5	LOC100507547	1.43749e-20	52.0958	0	unannotated_transcripts
NM_001143919	LTB4R	1.1355e-30	52.0059	0	protein_coding
NR_073117	EPGN	2.27176e-20	51.9991	0	unannotated_transcripts
NM_001127705	SERPINA1	2.76428e-28	51.7255	0	protein_coding
NR_028399	TSNAX-DISC1	8.83354e-21	51.6509	0	unannotated_transcripts
NM_001207036	ETV7	3.54813e-24	51.5502	0	protein_coding
NM_001505	GPER	5.71438e-21	51.468	0	protein_coding
NM_017451	BAIAP2	2.55645e-20	51.4118	0	protein_coding
NM_153768	CABYR	4.09429e-20	51.2429	0.599635	protein_coding
NM_182769	CREM	1.92226e-20	51.085	0	protein_coding
NM_001168341	TTC39B	2.54397e-20	50.7938	0	protein_coding
NR_049783	SNX17	3.58033e-20	50.748	0	nonsense_mediated_decay
NM_001171088	CLCN2	2.97316e-20	50.5886	0	protein_coding
NR_049753	ZNF211	1.21976e-20	50.5217	0	nonsense_mediated_decay
NM_001142504	STARD8	8.0215e-21	50.4309	0	protein_coding
NM_001135602	GLB1	1.2913e-20	50.3709	0	protein_coding
NM_001204848	TNFAIP8L2-SCNM1	7.71402e-20	50.3071	0.439854	protein_coding
NR_033953	P2RX7	4.35509e-20	49.9348	0	nonsense_mediated_decay
NR_033345	GGA3	4.8745e-20	49.8577	0	unannotated_transcripts
NM_018900	PCDHA1	8.23524e-32	49.6237	0	protein_coding
NM_001171632	NOSTRIN	2.48999e-20	49.4619	0	protein_coding
NR_047616	UTY	1.04531e-21	49.4427	0	protein_coding
NM_173533	TDRD5	5.88753e-21	49.4147	0	protein_coding
NM_145197	LIPT1	4.73387e-20	49.4041	0	protein_coding
NM_001242548	ANAPC16	1.4927e-27	49.3871	0	protein_coding
NM_001201480	OSBPL6	9.32451e-27	49.3688	0	protein_coding
NM_001167986	INCA1	2.72543e-24	49.3342	0	protein_coding
NR_028494	LYRM2	5.25382e-19	49.2445	0.45761	unannotated_transcripts
NM_031458	PARP9	5.39739e-20	49.2329	0	protein_coding
NR_052020	SNAPIN	6.65617e-20	49.0433	0	processed_transcript
NM_001261443	GNAL	2.00991e-25	48.9686	0	protein_coding
NM_181799	UBE2C	8.00277e-20	48.7592	0	protein_coding
NR_038830	PIN1	5.60727e-20	48.6596	0	processed_transcript
NM_001163120	RDM1	1.18183e-47	48.6578	0	protein_coding
NM_001439	EXTL2	3.69496e-23	48.583	0	protein_coding
NM_001127703	SERPINA1	3.1999e-27	48.5169	0	protein_coding
NM_001144038	TMEM25	7.74501e-20	48.4317	0	protein_coding
NM_147163	PSMG2	8.14983e-19	48.3167	0.445148	protein_coding
NM_182676	PLTP	4.76094e-34	48.2969	0	protein_coding
NM_148905	OSBPL9	5.15347e-19	47.9834	0.437291	protein_coding
NM_153025	C16orf55	7.2993e-20	47.958	0	protein_coding
NM_001127704	SERPINA1	5.22959e-27	47.8733	0	protein_coding
NM_001145148	CRHR1	6.19208e-23	47.8054	0	protein_coding
NR_046352	CNOT10	7.79859e-20	47.7536	0	nonsense_mediated_decay
NM_001271441	C21orf2	1.24526e-19	47.5532	0	protein_coding
NM_001270615	DEDD2	9.28267e-25	47.4903	0	protein_coding
NR_024133	GHRL	4.87283e-47	47.4724	0	unannotated_transcripts
NM_001017529	PRR5	1.19035e-18	47.309	0.431857	protein_coding
NM_001258239	TMEM218	2.44482e-22	47.2799	0	protein_coding
NM_152369	SLC44A3	3.00969e-22	47.2755	0	protein_coding
NR_073023	ST3GAL3	2.99845e-19	47.1935	0	nonsense_mediated_decay
NM_001253699	ERBB2IP	2.8303e-19	47.1219	0	protein_coding
NM_001130084	ABLIM2	6.70351e-23	47.1135	0	protein_coding
NM_001270699	ARHGAP12	1.09106e-20	47.0977	0	protein_coding
NM_001130928	MEF2A	1.87255e-18	46.9751	0.483002	protein_coding
NR_046202	C19orf47	4.32013e-22	46.763	0	protein_coding
NM_001130981	DYSF	1.40134e-23	46.7417	0	protein_coding
NM_001206974	DHPS	1.16822e-18	46.7279	0.390726	protein_coding
NM_001160115	C15orf40	2.97656e-24	45.9837	0	protein_coding
NM_001258300	KIAA1598	2.48814e-38	45.9424	0	protein_coding
NM_001255985	COLEC11	2.93282e-49	45.9341	0	protein_coding
NM_181272	CMTM1	7.49056e-42	45.8823	0	protein_coding
NM_001040097	MOSPD3	1.70403e-18	45.8521	0.545613	protein_coding
NM_001242900	PPP6R2	1.11431e-18	45.6045	0	protein_coding
NM_001199885	HYPK	4.51928e-19	45.5361	0	protein_coding
NM_001130978	DYSF	3.413e-21	45.5241	0	protein_coding
NM_001170782	FAM122C	1.57001e-22	45.4772	0	protein_coding
NM_001164759	PRKAR1B	1.31067e-26	45.4673	0	protein_coding
NM_001256401	ELOVL1	2.59897e-18	45.4382	0.397397	protein_coding
NM_018919	PCDHGA6	1.19974e-26	45.1978	0	protein_coding
NM_001142615	EHBP1	5.65436e-27	45.0206	0	protein_coding
NR_049754	ZNF211	1.32578e-18	44.9828	0	nonsense_mediated_decay
NR_073017	ST3GAL3	5.39021e-34	44.94	0	protein_coding
NM_199144	UBE2V1	5.18201e-19	44.9192	0	protein_coding
NM_018922	PCDHGB1	6.4909e-27	44.7079	0	protein_coding
NM_152494	DCST1	1.44738e-23	44.6274	0	protein_coding
NM_001130977	DYSF	3.25362e-19	44.5138	0	protein_coding
NM_001164552	DISC1	6.42586e-23	44.4911	0	unannotated_transcripts
NM_144968	RIBC1	2.12453e-18	44.468	0	protein_coding
NM_181833	NF2	6.99219e-19	44.4213	0	protein_coding
NM_003736	PCDHGB4	4.09888e-28	44.3505	0	protein_coding
NM_182643	DLC1	4.48119e-20	44.2248	0	protein_coding
NM_138484	SGOL1	1.34713e-18	44.1988	0	protein_coding
NM_001184901	CARD8	5.78324e-19	44.0558	0	protein_coding
NM_001267557	PDCD6	4.58595e-43	44.0523	0	protein_coding
NM_016135	ETV7	1.48998e-27	43.9625	0	protein_coding
NM_001256714	DNAAF3	1.00419e-18	43.8715	0	protein_coding
NM_001199085	TDRD5	4.13341e-22	43.8425	0	protein_coding
NM_001164475	SLC41A3	7.74366e-18	43.6405	0.480369	protein_coding
NR_033674	DGCR2	8.22712e-19	43.5503	0	protein_coding
NM_001145137	CPT1B	1.61705e-18	43.4348	0	protein_coding
NM_001007027	ALG8	4.09202e-22	43.3866	0	protein_coding
NR_047582	VPS13B	2.85493e-18	43.3011	0	protein_coding
NM_152880	PTK7	8.56342e-25	43.1651	0	protein_coding
NR_047554	UBE2V1	6.35048e-18	42.7731	0	processed_transcript
NM_001185099	CD22	1.18571e-17	42.6977	0	protein_coding
NM_001198687	LEPR	6.68245e-18	42.6677	0	protein_coding
NR_073107	ITGA2	1.85363e-19	42.6611	0	protein_coding
NM_015366	PRR5	1.45098e-20	42.6187	0	protein_coding
NM_001257159	CEP41	5.62818e-18	42.4702	0	protein_coding
NM_001198775	PI4KB	3.3157e-26	42.4478	0	protein_coding
NM_001207037	ETV7	2.44613e-28	42.1995	0	protein_coding
NM_012189	CABYR	1.77814e-20	42.115	0	protein_coding
NM_207194	ADAM15	2.21575e-18	42.085	0	protein_coding
NM_001199534	C20orf24	2.3079e-26	42.0798	0	protein_coding
NM_001261430	PTGES3L	4.88527e-18	42.0796	0	protein_coding
NM_001256959	CLCN6	3.93871e-20	42.0224	0	protein_coding
NR_027672	ADARB1	8.23109e-29	42.0123	0	nonsense_mediated_decay
NM_001167619	MLH1	4.36696e-17	41.8571	0.616095	protein_coding
NM_000743	CHRNA3	7.96357e-19	41.7836	0	protein_coding
NM_001261423	OS9	1.86261e-17	41.7797	0	protein_coding
NM_001012959	DISC1	3.25837e-18	41.5128	0	protein_coding
NM_001024959	ARPC4	2.4835e-17	41.2341	0	protein_coding
NM_001168357	PLA2G7	1.33716e-17	41.2133	0	protein_coding
NM_001252076	SLC9A3R2	1.04498e-23	41.053	0	protein_coding
NM_001244945	STEAP2	2.38631e-30	40.8072	0	protein_coding
NM_001243783	BBIP1	1.53994e-17	40.7834	0	protein_coding
NM_001207056	DNMT3B	8.65324e-18	40.7682	0	protein_coding
NM_001258368	DIAPH3	7.91175e-18	40.4495	0	protein_coding
NM_001195251	APTX	6.26026e-17	40.4141	0	protein_coding
NM_001136021	NFATC2	1.75349e-20	40.3629	0	protein_coding
NM_001127359	PHTF2	3.03642e-16	40.2428	0.439257	protein_coding
NR_037171	LOC100507547	2.18237e-36	40.1341	0	lncRNA
NM_174967	ST3GAL3	3.13064e-18	40.1006	0	protein_coding
NR_051958	ARFRP1	5.30092e-17	40.0101	0	protein_coding
NR_047655	KANSL3	1.4756e-24	39.9202	0	protein_coding
NM_001206880	MRVI1	3.09678e-17	39.9148	0	protein_coding
NM_001039877	STRN4	3.72923e-16	39.8563	0.602234	protein_coding
NR_027998	RDM1	3.27516e-50	39.8549	0	nonsense_mediated_decay
NR_072984	TMEM254	8.48395e-17	39.8465	0	processed_transcript
NM_000923	PDE4C	2.17537e-17	39.7408	0	protein_coding
NR_023351	SPRYD7	6.8031e-17	39.6253	0	unannotated_transcripts
NM_001204136	MBD1	1.01522e-17	39.6145	0	protein_coding
NM_001257396	UBE2V1	8.5058e-16	39.2445	0.472112	protein_coding
NM_001253914	TBC1D1	2.63733e-17	39.0216	0	processed_transcript
NR_024145	GHRLOS	1.58833e-16	38.8874	0	unannotated_transcripts
NR_038391	ANAPC16	1.59302e-16	38.8299	0	unannotated_transcripts
NM_001206887	CTNND1	1.61989e-29	38.823	0	protein_coding
NM_178009	DGKH	4.37178e-17	38.7329	0	protein_coding
NM_001257390	CD63	8.13443e-24	38.6906	0	protein_coding
NM_001184693	NPNT	5.35321e-20	38.4027	0	protein_coding
NM_001244897	PTBP3	1.69391e-16	38.3636	0	protein_coding
NM_172350	CD46	1.50729e-19	38.168	0	protein_coding
NM_018924	PCDHGB3	5.04698e-25	38.131	0	protein_coding
NM_144712	SLC23A3	2.10752e-17	38.1288	0	protein_coding
NM_001145523	RAI14	6.48255e-23	38.0882	0	protein_coding
NM_001142519	FAM111A	2.32229e-16	38.0786	0	protein_coding
NM_001252660	EPB41L2	7.45366e-17	38.0122	0	protein_coding
NM_013404	MSLN	7.56786e-17	38.0044	0	protein_coding
NM_001169109	SCO2	8.218e-17	37.8706	0	protein_coding
NM_001204172	MDM4	2.85038e-16	37.7936	0	protein_coding
NM_001197128	IRF3	1.51155e-19	37.653	0	protein_coding
NM_001271908	C16orf55	2.10654e-16	37.5253	0	protein_coding
NM_001145448	ZNF200	1.1349e-16	37.4377	0	protein_coding
NM_001135730	TOM1	3.64214e-16	37.4281	0	protein_coding
NM_001127615	ENOX1	2.69381e-16	37.3947	0	protein_coding
NM_001185061	AQP1	4.53315e-16	37.1651	0	unannotated_transcripts
NM_005714	KCNK7	2.39828e-16	37.0892	0	protein_coding
NR_073567	GHRLOS	1.86556e-16	37.0788	0	unannotated_transcripts
NM_139013	MAPK14	2.85927e-16	37.0315	0	protein_coding
NM_001185081	FMR1	3.70772e-17	36.9704	0	protein_coding
NM_197957	MAX	2.10502e-63	36.6606	0	protein_coding
NM_024728	C7orf10	1.58214e-15	36.6031	0.45942	protein_coding
NM_133341	RAD17	7.25631e-18	36.4793	0	protein_coding
NM_201440	PPHLN1	1.58783e-15	36.4528	0.443336	protein_coding
NR_047676	TARS	2.92963e-16	36.4515	0	protein_coding
NR_027394	TJAP1	4.33415e-16	36.3744	0	protein_coding
NM_001256673	STOML1	6.62995e-16	36.2993	0	protein_coding
NM_001185075	FMR1	4.12982e-18	36.2528	0	protein_coding
NM_001198674	TMEM136	7.16612e-20	36.2037	0	protein_coding
NM_001145375	ALKBH2	7.64206e-16	36.1083	0	protein_coding
NM_001195736	FAM213B	3.23831e-19	36.0737	0	protein_coding
NM_001265603	MORF4L1	9.94162e-22	35.9758	0	protein_coding
NM_001160110	NOS3	3.32921e-17	35.9613	0	protein_coding
NM_001161013	ARMC10	2.53487e-15	35.9317	0.515843	protein_coding
NM_144704	AIFM3	3.89694e-18	35.8035	0	protein_coding
NM_001258269	UTY	7.99043e-23	35.5302	0	protein_coding
NM_016724	FOLR1	2.25563e-28	35.4532	0	protein_coding
NM_001267544	ARFRP1	1.27e-20	35.3869	0	protein_coding
NM_001252091	MRAS	1.97698e-26	35.3813	0	protein_coding
NR_073108	KLF7	1.02658e-15	35.2007	0	unannotated_transcripts
NM_001042481	FRMD6	1.25688e-21	35.1349	0	protein_coding
NM_001257175	DDX19B	5.90844e-15	35.1257	0.402963	protein_coding
NR_036693	CLEC2D	1.18847e-15	35.061	0	nonsense_mediated_decay
NM_001164778	ATXN3	1.71163e-27	35.0284	0	protein_coding
NM_005841	SPRY1	6.03872e-15	34.9881	0.611189	protein_coding
NR_073594	TYSND1	1.69484e-16	34.9518	0	processed_transcript
NM_001009934	DNASE1L1	3.24054e-15	34.7089	0	protein_coding
NM_001178017	DBI	2.7581e-15	34.6621	0	protein_coding
NM_001267060	SNX17	9.12529e-15	34.6239	0.469608	protein_coding
NM_001201584	SEC22C	2.587e-21	34.5579	0	protein_coding
NM_005979	S100A13	4.72197e-15	34.5556	0.317494	protein_coding
NR_073020	ST3GAL3	5.7449e-25	34.5254	0	protein_coding
NR_047532	CDKN2B-AS1	1.89507e-16	34.5019	0	lncRNA
NM_001160171	NAT1	2.28438e-15	34.4324	0	protein_coding
NM_153427	PITX2	6.32682e-16	34.374	0	protein_coding
NM_001018077	NR3C1	4.12371e-29	34.3213	0	protein_coding
NM_001267574	EIF3C	2.3339e-23	34.2662	0	protein_coding
NR_046345	ANAPC10	6.15538e-16	34.1625	0	processed_transcript
NM_001193600	SCP2	1.83056e-15	33.9913	0	protein_coding
NR_028504	MIR22HG	1.99068e-15	33.9061	0	lncRNA
NM_001178141	TFDP2	6.00646e-15	33.8026	0	protein_coding
NM_001271429	EMC1	1.36622e-14	33.7938	0.603626	protein_coding
NM_001276251	LDLRAD4	3.42051e-16	33.7534	0	protein_coding
NM_001256580	RPL10	4.64802e-33	33.6759	0	protein_coding
NM_001267869	HSD11B1L	2.31215e-15	33.6728	0	protein_coding
NM_030972	ZNF611	1.65382e-20	33.6701	0	protein_coding
NM_001010990	HERPUD1	3.63189e-15	33.6556	0	unannotated_transcripts
NM_001098533	CDK10	4.71765e-14	33.4973	0.46401	protein_coding
NM_020418	PCBP4	3.08476e-15	33.4438	0	protein_coding
NM_001251884	VIPR1	2.09948e-19	33.2456	0	protein_coding
NR_024144	GHRLOS	3.1393e-14	33.2355	0.455746	lncRNA
NM_001171132	FAM3A	1.2249e-18	33.1824	0	protein_coding
NM_001199815	GGCT	2.90561e-15	33.1277	0	protein_coding
NM_001167733_3	VARS2	1.17458e-14	33.1274	0.48625	unannotated_transcripts
NM_000591	CD14	5.55453e-15	33.0642	0	protein_coding
NM_001145308	LRTOMT	2.84232e-15	33.0448	0	protein_coding
NM_001242370	CACFD1	2.43612e-15	33.0144	0	protein_coding
NR_033948	P2RX7	2.50748e-29	33.01	0	protein_coding
NM_001261393	CALCOCO2	5.32973e-15	33.0064	0	protein_coding
NM_001258274	MLH1	4.38929e-15	32.9957	0	protein_coding
NM_001024937	MINK1	3.38641e-14	32.9309	0.594398	protein_coding
NM_001256967	CCDC51	5.14601e-15	32.9254	0	protein_coding
NM_001001585	PDE9A	5.24248e-29	32.8655	0	protein_coding
NM_001077703	MIER1	7.15482e-17	32.7874	0	protein_coding
NM_001190384	GNE	6.86341e-15	32.7696	0	protein_coding
NM_004991	MECOM	1.67569e-15	32.6593	0	protein_coding
NM_001267623	ITPA	2.49718e-14	32.6568	0.444724	protein_coding
NM_001271955	TPGS2	1.85221e-42	32.651	0	protein_coding
NM_001204137	MBD1	2.45766e-19	32.6073	0	protein_coding
NM_172088	TNFSF13	3.7151e-15	32.458	0	protein_coding
NR_027437	IP6K2	1.52426e-14	32.2921	0	nonsense_mediated_decay
NM_001256483	EPHX2	4.16096e-18	32.2693	0	protein_coding
NM_001204138	MBD1	3.80485e-19	32.2498	0	protein_coding
NM_001005333	MAGED1	1.30342e-18	32.2053	0	protein_coding
NM_001270686	JOSD2	3.67493e-14	32.0418	0.443035	protein_coding
NM_213726	INCA1	5.6219e-15	32.0121	0	protein_coding
NM_001271289	ZNF512	4.96324e-14	31.8537	0.607303	protein_coding
NR_073137	MAX	4.62349e-14	31.6259	0.440992	protein_coding
NM_001256433	PCYT2	2.84976e-14	31.6238	0	protein_coding
NM_001261397	P2RX4	7.79896e-18	31.5229	0	protein_coding
NM_001161660	MYB	2.49961e-15	31.4691	0	protein_coding
NM_001127399	YPEL5	1.01347e-18	31.4608	0	protein_coding
NM_001130172	MYB	3.93721e-21	31.4505	0	protein_coding
NM_007243_2	NRM	1.05583e-14	31.0809	0	unannotated_transcripts
NM_001171089	CLCN2	4.66816e-17	31.0781	0	protein_coding
NM_001160170	NAT1	3.18315e-18	30.9869	0	protein_coding
NM_001204887	RAB43	1.04475e-17	30.972	0	protein_coding
NM_213648	TCF7	1.47039e-13	30.9684	0.608359	protein_coding
NM_001011669	CHCHD7	1.68453e-14	30.9497	0	protein_coding
NM_172359	CD46	2.22315e-14	30.882	0	protein_coding
NM_001257237	ALG13	1.57903e-14	30.8595	0	protein_coding
NM_001270728	BCL2L13	4.62577e-14	30.7251	0	protein_coding
NM_001256709	ANAPC10	7.59604e-15	30.6209	0	protein_coding
NM_001128220	VGLL4	1.76433e-30	30.5343	0	protein_coding
NM_001031681	CTNS	5.92599e-14	30.5166	0	protein_coding
NM_001243985	RELA	2.44119e-14	30.4403	0	protein_coding
NM_133338	RAD17	1.32016e-14	30.4215	0	protein_coding
NM_001017957	OS9	7.73767e-17	30.3896	0	protein_coding
NM_001167823	BLCAP	1.79238e-13	30.385	0.448367	protein_coding
NM_001270370	TMEM254	6.18777e-17	30.3817	0	protein_coding
NR_073449	REEP2	1.1395e-17	30.291	0	protein_coding
NM_001272019	EPC1	6.86728e-22	30.1165	0	protein_coding
NM_001167990	PQBP1	2.02659e-17	30.0166	0	protein_coding
NM_182723	CREM	4.41986e-31	29.9406	0	protein_coding
NR_051971	CREM	1.03572e-28	29.8999	0	unannotated_transcripts
NM_001190738	NFIB	1.01205e-13	29.8733	0	protein_coding
NR_027438	IP6K2	2.31082e-14	29.8324	0	nonsense_mediated_decay
NR_049756	RPP14	2.07401e-14	29.8131	0	unannotated_transcripts
NM_130804	MEN1	4.76267e-18	29.7913	0	protein_coding
NM_001257172	DDX19B	1.29318e-16	29.6923	0	protein_coding
NM_130835	OPA1	6.08198e-19	29.6652	0	protein_coding
NR_030770	CCM2	3.05357e-18	29.6416	0	processed_transcript
NM_001136007	FXYD3	3.14542e-22	29.4807	0	protein_coding
NM_001204356	SPOCK3	3.28283e-16	29.4221	0	protein_coding
NM_001160167	PRR5L	6.06754e-14	29.4172	0	protein_coding
NM_014010	ASTN2	2.63554e-220	29.3625	0	protein_coding
NM_001142449	SPNS1	2.79108e-13	29.3336	0.568395	protein_coding
NM_032954	MLXIPL	9.1385e-13	29.2784	0.439555	protein_coding
NR_052000	ITPA	5.24335e-14	29.2763	0	processed_transcript
NR_036550	PES1	4.93841e-23	29.2332	0	unannotated_transcripts
NR_047670	FAM173B	5.4033e-30	29.2245	0	protein_coding
NR_074073	NEURL2	4.52727e-14	29.0905	0	unannotated_transcripts
NR_073066_6	NRM	1.98741e-14	29.0618	0	unannotated_transcripts
NM_001144912	ATG7	3.48009e-13	29.0006	0.389606	protein_coding
NM_001206881	MRVI1	4.09193e-18	28.9869	0	protein_coding
NM_001242814	ANKRD6	1.27997e-13	28.9832	0	protein_coding
NM_001172660	ZFYVE28	8.69152e-14	28.9582	0	protein_coding
NM_001267057	CASP7	3.0964e-13	28.9354	0.619789	protein_coding
NM_001143823	ZBTB14	1.96806e-16	28.907	0	protein_coding
NM_001142541	SLC35B3	3.07881e-15	28.8948	0	protein_coding
NM_001198967	NFATC4	1.50984e-15	28.8694	0	protein_coding
NR_045564	ASCC1	3.49733e-14	28.7863	0	protein_coding
NR_049790	PLEKHB2	3.82086e-16	28.6938	0	unannotated_transcripts
NR_045691	C19orf12	3.74811e-14	28.6769	0	unannotated_transcripts
NM_198707	HSD11B1L	4.02903e-22	28.6616	0	protein_coding
NM_001251984	RCAN3	5.46632e-13	28.645	0.47295	protein_coding
NM_001267562	CREM	1.91854e-13	28.6279	0	protein_coding
NM_001159380	MTHFSD	4.07781e-13	28.6259	0.608977	protein_coding
NM_001201476	C18orf21	2.42192e-32	28.5316	0	protein_coding
NM_001135187	AGFG1	1.5076e-13	28.5285	0	protein_coding
NM_174969	ST3GAL3	1.02661e-30	28.4754	0	protein_coding
NR_027996	RDM1	7.47797e-17	28.3997	0	nonsense_mediated_decay
NM_001243204	ECSIT	1.77061e-16	28.3513	0	protein_coding
NM_001191049	SEC31A	9.62315e-22	28.3198	0	protein_coding
NM_001198965	NFATC4	7.38232e-17	28.3	0	protein_coding
NM_001160111	NOS3	1.29471e-17	28.2554	0	protein_coding
NM_001243659	GLRX	1.8426e-15	28.2166	0	protein_coding
NR_051952	HDAC8	1.2293e-17	28.2073	0	nonsense_mediated_decay
NM_001199054	CDIP1	6.87319e-16	28.1951	0	protein_coding
NM_001195124	C16orf95	2.17918e-22	28.1669	0	protein_coding
NM_004757	AIMP1	3.10608e-48	28.1389	0	protein_coding
NM_001024944	ASL	2.29945e-13	28.0792	0	protein_coding
NR_033680	CARD8	4.09515e-18	28.0039	0	nonsense_mediated_decay
NM_001199256	SGOL1	1.31068e-15	27.9987	0	protein_coding
NM_001190827	FAM217B	8.76062e-14	27.8956	0	protein_coding
NM_001025236	TSPAN4	4.01965e-13	27.7818	0	protein_coding
NM_001164553	DISC1	1.39245e-13	27.7388	0	protein_coding
NM_001203252_1	MAPT	8.76171e-20	27.6855	0	unannotated_transcripts
NM_001198614	MAP7	1.13004e-16	27.6747	0	protein_coding
NM_139069	MAPK9	3.03313e-14	27.6563	0	protein_coding
NM_001244815	FOXP1	2.73445e-14	27.6324	0	protein_coding
NM_001197319	CLEC2D	2.45606e-13	27.6206	0	protein_coding
NM_001163436	TBCK	4.12042e-14	27.6154	0	protein_coding
NM_001207041	ETV7	4.37909e-21	27.4932	0	protein_coding
NM_080648	APEX1	3.2507e-13	27.4264	0	protein_coding
NM_001118888	ANGPT2	9.86927e-13	27.4022	0.594654	protein_coding
NM_001270709_1	NRM	9.95227e-13	27.386	0.444422	unannotated_transcripts
NM_001184692	NPNT	9.86713e-13	27.3723	0.623332	protein_coding
NM_001272050	TK2	2.10644e-13	27.3528	0	protein_coding
NM_001267059	SNX17	4.05551e-16	27.3263	0	protein_coding
NR_073037	STOM	7.48456e-14	27.1524	0	protein_coding
NR_028460	ATXN3	5.71262e-27	26.9294	0	unannotated_transcripts
NM_001127585	ING4	1.55624e-14	26.9094	0	protein_coding
NM_203329	CD59	2.25759e-12	26.821	0.487116	protein_coding
NM_172169	CAMK2G	1.14873e-20	26.7477	0	protein_coding
NM_001114139	EPB49	2.77839e-12	26.7339	0.595851	protein_coding
NM_001244813	FOXP1	8.74968e-14	26.7247	0	protein_coding
NM_152246	CPT1B	3.74151e-16	26.7192	0	protein_coding
NM_018929	PCDHGC5	9.29271e-19	26.693	0	protein_coding
NM_014591	KCNIP2	3.96562e-29	26.6574	0	protein_coding
NM_001130482	VRK2	6.44127e-46	26.629	0	protein_coding
NM_001097634	GCNT1	2.46255e-13	26.4807	0	protein_coding
NM_001195055	DDIT3	1.7742e-12	26.3602	0.303207	protein_coding
NM_173539	ZNF596	4.65518e-13	26.2572	0	protein_coding
NM_001195654	ZGPAT	3.36211e-12	26.1649	0.606074	protein_coding
NM_022764	MTHFSD	1.21371e-15	26.1583	0	protein_coding
NM_001135610	PRDM2	1.26805e-13	26.0891	0	protein_coding
NM_012104	BACE1	4.09607e-13	26.0806	0	protein_coding
NM_181340	DCAF4	1.34283e-16	26.0162	0	protein_coding
NM_001202485	HSPE1-MOB4	4.48256e-26	26.0129	0	protein_coding
NM_001270708_1	NRM	1.56255e-16	25.989	0	unannotated_transcripts
NM_153436	ODF2	4.21267e-16	25.9683	0	protein_coding
NM_001242359	RHOBTB1	1.72304e-19	25.9235	0	protein_coding
NR_072987	TMEM254	1.0398e-13	25.9035	0	processed_transcript
NM_001170751	SRPX	1.22608e-12	25.8486	0	protein_coding
NM_018839	NSFL1C	2.75184e-12	25.8271	0.535287	protein_coding
NM_024549	TCTN1	1.85951e-12	25.8261	0.461866	protein_coding
NM_001199535	TGIF2-C20orf24	1.25188e-50	25.8253	0	protein_coding
NM_181304	MRPL52	1.31553e-12	25.8248	0	protein_coding
NM_001256716	DNAAF3	2.04415e-17	25.7102	0	protein_coding
NM_001257198	CUL3	4.45105e-14	25.6775	0	protein_coding
NR_033237	FAM3A	7.41898e-13	25.4388	0	unannotated_transcripts
NM_001144761	TLE2	5.83132e-13	25.4355	0	protein_coding
NR_051957	ARFRP1	4.34772e-12	25.4317	0.493292	protein_coding
NM_001159575	SCNN1A	4.80886e-17	25.41	0	protein_coding
NM_001199050	LEMD1	8.49117e-17	25.4074	0	protein_coding
NM_080416	44078	1.48305e-12	25.3155	0	protein_coding
NM_001207055	DNMT3B	5.09455e-12	25.1605	0.507938	protein_coding
NM_001242918	ZFAND6	8.09707e-13	25.154	0	protein_coding
NM_001247988	CTAGE5	7.35637e-13	25.1318	0	protein_coding
NM_198217	ING1	4.82187e-13	25.1216	0	protein_coding
NM_001242773	TMEM139	1.40852e-12	25.1049	0	protein_coding
NM_001258304	CCDC74A	1.56968e-13	25.1027	0	protein_coding
NM_001142428	MORF4L2	3.08519e-12	25.0114	0	protein_coding
NR_037673	SERF2-C15ORF63	1.55256e-12	24.9921	0	nonsense_mediated_decay
NM_001243789	SMUG1	1.66795e-12	24.9203	0	protein_coding
NR_052025	SLIRP	1.52213e-12	24.886	0	nonsense_mediated_decay
NM_001242883	CARKD	8.5741e-12	24.8749	0.608095	protein_coding
NM_001256915	IDNK	2.33118e-13	24.8648	0	protein_coding
NM_001177664	RIF1	3.9265e-13	24.7615	0	protein_coding
NM_001127603	NMRK1	9.19552e-13	24.6934	0	protein_coding
NR_026985	LOC339524	7.76488e-13	24.6737	0	lncRNA
NM_174965	ST3GAL3	6.12258e-19	24.6599	0	protein_coding
NM_018199	EXD2	1.0449e-12	24.5746	0	protein_coding
NM_033668	ITGB1	4.35329e-13	24.5154	0	protein_coding
NM_004290	RNF14	7.42411e-12	24.4897	0.520713	protein_coding
NM_001265594	PLEKHG5	6.29743e-13	24.4599	0	protein_coding
NM_001003674	LDLRAD4	1.8542e-21	24.3313	0	protein_coding
NR_047691	PIGT	5.38473e-15	24.2955	0	nonsense_mediated_decay
NM_001270880	GNPDA2	5.85759e-12	24.2924	0.440093	protein_coding
NR_033955	P2RX7	1.00536e-12	24.2523	0	protein_coding
NR_047538	CDKN2B-AS1	1.23405e-13	24.2521	0	lncRNA
NM_175073	APTX	6.41398e-13	24.2406	0	protein_coding
NR_037775	MIA-RAB4B	3.44442e-12	24.1866	0	nonsense_mediated_decay
NM_001005389	NFASC	1.82592e-14	24.1852	0	protein_coding
NM_001272067	SHISA5	3.47386e-20	24.1336	0	protein_coding
NR_073128	KTN1	6.09843e-16	24.1261	0	protein_coding
NM_033407	DOCK7	5.43917e-13	24.0818	0	protein_coding
NM_001033559	DYX1C1	7.80534e-16	23.9347	0	protein_coding
NM_001163546	SYNRG	1.38163e-11	23.9305	0.606688	protein_coding
NM_001256688	MELK	2.86044e-11	23.909	0.373249	protein_coding
NM_022970	FGFR2	1.73278e-11	23.8935	0.610302	protein_coding
NM_001184941	FAM219A	4.47657e-15	23.8436	0	protein_coding
NM_032977	CASP10	2.15093e-12	23.815	0	protein_coding
NM_130473	MADD	2.53462e-12	23.8108	0	protein_coding
NM_021159	RAP1GDS1	1.97973e-12	23.8069	0	protein_coding
NM_023946	LYNX1	1.98163e-54	23.7698	0	protein_coding
NM_031462	CD99L2	2.2153e-12	23.7596	0	protein_coding
NM_130833	OPA1	1.60044e-14	23.749	0	protein_coding
NM_001202409	ZNF559	1.21764e-12	23.7478	0	protein_coding
NM_001243776	CEP57	2.54022e-11	23.7434	0.516199	protein_coding
NM_001199782	POC1B-GALNT4	9.02267e-12	23.671	0.434802	protein_coding
NM_001145278	NECAP2	2.09619e-11	23.6468	0.532614	protein_coding
NM_001204420	RGS6	2.64008e-12	23.6265	0	protein_coding
NR_028034	FAS	5.1243e-12	23.5672	0	nonsense_mediated_decay
NM_001201553	ZNF821	3.00004e-19	23.5528	0	protein_coding
NR_036565	CCT3	1.76608e-12	23.4927	0	protein_coding
NM_012068	ATF5	2.82071e-12	23.4861	0	protein_coding
NR_074088	ATRNL1	4.25855e-16	23.4485	0	nonsense_mediated_decay
NM_001144999	ITGAV	1.25828e-11	23.3801	0.59329	protein_coding
NM_001170808	LARP4	1.12606e-11	23.3678	0.56336	protein_coding
NM_001270373	TMEM254	1.32092e-12	23.3622	0	protein_coding
NM_001258402	SLC4A8	5.1016e-15	23.301	0	protein_coding
NM_003990	PAX2	2.32119e-12	23.2965	0	protein_coding
NM_001160333	NFASC	2.85838e-13	23.2952	0	protein_coding
NM_001252073	SLC9A3R2	4.08681e-17	23.2804	0	protein_coding
NM_001206488	ATF3	9.46584e-11	23.1873	0.434152	protein_coding
NM_201538	NDRG2	1.98632e-11	23.1301	0.596622	protein_coding
NM_198088	ZNF200	4.841e-12	23.1231	0	protein_coding
NM_001242899	PPP6R2	4.78975e-12	23.1114	0	protein_coding
NM_001164776	ATXN3	1.09215e-22	23.077	0	processed_transcript
NM_178586	PPP2R5C	9.09321e-13	23.0557	0	protein_coding
NM_000646	AGL	4.71548e-12	23.0528	0	protein_coding
NM_001178107	ZNF185	5.76364e-18	23.0093	0	protein_coding
NR_037567	MRPL49	4.71813e-16	23.0074	0	processed_transcript
NM_182965	SPHK1	1.1586e-12	22.9918	0	protein_coding
NM_018896	CACNA1G	4.68008e-29	22.9338	0	protein_coding
NM_001163023	PLK1S1	9.509e-12	22.8956	0	protein_coding
NM_176794	MRPL43	5.32383e-12	22.8891	0	protein_coding
NM_001198664	GNG10	1.68662e-11	22.8816	0.477556	protein_coding
NM_001003675	LDLRAD4	7.31303e-21	22.856	0	protein_coding
NM_174958	ATP2A3	1.13054e-11	22.8134	0	protein_coding
NM_173044	IL18BP	1.54784e-25	22.8019	0	protein_coding
NM_001199822	MDP1	2.46162e-12	22.779	0	protein_coding
NM_001193531	TMEM116	7.06954e-12	22.7518	0	protein_coding
NM_001178122	ABI1	2.40177e-12	22.7497	0	protein_coding
NM_182898	CREB5	4.95992e-12	22.7367	0	protein_coding
NM_001267549	ARFRP1	1.32659e-11	22.7212	0	protein_coding
NM_001257399	UBE2V1	6.32092e-34	22.6913	0	protein_coding
NM_001114619	MGAT1	3.92755e-11	22.6549	0.446238	protein_coding
NM_001097613	GPR89A	2.11075e-12	22.641	0	protein_coding
NM_202002	FOXM1	3.00741e-12	22.6312	0	protein_coding
NM_152897	SNX21	3.91025e-11	22.6282	0.447089	protein_coding
NM_001252075	SLC9A3R2	8.59105e-17	22.604	0	protein_coding
NM_001256012	MYH10	1.99062e-17	22.604	0	protein_coding
NM_172214	CAMKK2	5.4189e-12	22.5814	0	protein_coding
NR_036532	UBAC2-AS1	4.8291e-12	22.49	0	lncRNA
NM_001145513	SCRN1	1.3489e-11	22.4076	0	protein_coding
NR_051954	ARFRP1	2.60058e-12	22.3768	0	protein_coding
NM_001167928	IL1RAP	2.63219e-12	22.36	0	protein_coding
NM_001198940	DTNA	1.92687e-14	22.3447	0	protein_coding
NM_001114099	SEZ6L2	2.29959e-12	22.3393	0	protein_coding
NM_199451	ZNF365	3.5395e-18	22.3358	0	protein_coding
NM_001256090	ATF2	1.06653e-11	22.3202	0	protein_coding
NM_001142350	THOC6	8.86599e-11	22.3159	0.451304	protein_coding
NM_001244812	FOXP1	7.26627e-15	22.2629	0	protein_coding
NM_001272112	PAQR6	3.4413e-11	22.2581	0.450997	protein_coding
NM_018918	PCDHGA5	2.47804e-20	22.2537	0	protein_coding
NM_001206996	PPP2R2C	4.51125e-12	22.2285	0	protein_coding
NM_001202544	CUX1	2.21596e-11	22.147	0	protein_coding
NR_049752	ZNF211	2.62765e-18	22.1105	0	nonsense_mediated_decay
NM_001258398	CCDC103	7.74275e-14	22.0177	0	protein_coding
NM_001169117	STIM2	2.61125e-14	22.0149	0	protein_coding
NM_001195306	BBIP1	6.89341e-12	22.0024	0	protein_coding
NM_001166113	PNPLA6	4.87655e-12	21.9904	0	protein_coding
NM_013979	BNIP1	8.78856e-16	21.9843	0	protein_coding
NM_001271650	AZI2	7.17405e-18	21.9493	0	protein_coding
NR_033342	CELF5	8.93683e-12	21.9293	0	nonsense_mediated_decay
NM_138764	BAX	1.2205e-16	21.9222	0	protein_coding
NM_139344	BIN1	1.8289e-22	21.8783	0	protein_coding
NM_001143827	MAPRE2	2.05906e-12	21.8554	0	protein_coding
NM_001220482	MEIS2	7.12769e-12	21.8512	0	protein_coding
NM_001174160	SH2D4A	3.99818e-12	21.8211	0	protein_coding
NM_001197127	IRF3	3.80127e-16	21.781	0	protein_coding
NM_153283	HYAL1	3.24878e-11	21.6857	0.449221	protein_coding
NM_145813	AIFM1	1.01398e-20	21.6571	0	unannotated_transcripts
NM_001136177	EGR2	1.06021e-11	21.6516	0	protein_coding
NM_001243799	TSC22D1	2.73354e-25	21.5983	0	protein_coding
NR_033699	FMR1	7.62217e-17	21.5654	0	protein_coding
NM_203356	CTAGE5	1.85496e-12	21.4497	0	protein_coding
NM_032484	GHDC	1.07992e-11	21.3678	0	protein_coding
NM_001040716	PC	1.29305e-11	21.3067	0	protein_coding
NR_075076	C18orf8	4.92721e-18	21.3036	0	unannotated_transcripts
NM_001184966	WDR44	2.1415e-15	21.2973	0	protein_coding
NM_001143813	BDNF	1.03211e-10	21.2403	0.572189	protein_coding
NM_001171511	MCFD2	8.11682e-12	21.2356	0	protein_coding
NM_004731	SLC16A7	4.22595e-11	21.2059	0	protein_coding
NR_029415	SHMT2	2.80364e-15	21.187	0	nonsense_mediated_decay
NM_001127663	GSN	5.93986e-11	21.1574	0.607919	protein_coding
NM_203386	RNH1	1.76642e-10	21.0779	0.626353	protein_coding
NM_001258243	TMEM218	7.93563e-27	21.0762	0	protein_coding
NM_001251918	RAP1B	1.51766e-11	21.0464	0	protein_coding
NM_001167594	CTSA	2.05878e-10	21.0436	0.50717	protein_coding
NM_001242845	RNF146	1.09232e-14	20.9957	0	protein_coding
NM_005269	GLI1	1.03009e-11	20.9832	0	protein_coding
NR_038226	ZNF503-AS1	1.81768e-11	20.9372	0	lncRNA
NR_033757	MINOS1	4.79432e-16	20.9212	0	protein_coding
NM_001201574	NUBPL	8.63698e-12	20.9005	0	processed_transcript
NM_001145657	RAP1GAP	6.83942e-12	20.8867	0	protein_coding
NR_033950	P2RX7	3.01854e-43	20.8831	0	retained_intron
NM_001166003	APOBEC3H	1.73125e-11	20.8663	0	protein_coding
NM_001193637	DHRS4L2	3.22618e-11	20.8238	0	protein_coding
NM_198721	COL25A1	4.05855e-46	20.7975	0	protein_coding
NR_051955	ARFRP1	2.1037e-20	20.7736	0	protein_coding
NM_030958	SLCO5A1	5.89145e-12	20.7563	0	protein_coding
NM_001206889	CTNND1	2.16049e-19	20.633	0	protein_coding
NM_001144924	LOC81691	3.12734e-11	20.619	0	protein_coding
NM_030570	UPK3B	6.22162e-12	20.6188	0	protein_coding
NM_001185015	SP110	7.07557e-14	20.5187	0	protein_coding
NM_001172411	VANGL1	7.73787e-11	20.514	0.447271	protein_coding
NM_139032	MAPK7	3.27976e-11	20.4986	0	protein_coding
NM_030769	NPL	4.91074e-25	20.4511	0	protein_coding
NR_024195	TOM1	2.6968e-11	20.4196	0	protein_coding
NR_073081	CRIP2	4.89442e-16	20.3875	0	retained_intron
NM_001206943	CSPG5	4.60898e-12	20.3797	0	protein_coding
NM_001257963	PDLIM3	5.6898e-11	20.361	0	protein_coding
NM_001008709	PPP1CA	1.33604e-11	20.3585	0	protein_coding
NM_001256293	KRT8	1.94127e-11	20.3183	0	protein_coding
NM_001256601	TRIM46	1.30199e-11	20.2885	0	protein_coding
NM_001201370	RNF7	2.62333e-38	20.2474	0	protein_coding
NR_051956	ARFRP1	3.51503e-20	20.2028	0	protein_coding
NM_000950	PRRG1	5.25241e-11	20.1881	0	protein_coding
NM_173191	KCNIP2	1.7936e-23	20.17	0	protein_coding
NM_001204148	HDAC9	2.74347e-11	20.1109	0	protein_coding
NM_001097599	SLC35G2	1.09845e-10	20.0359	0.439078	protein_coding
NM_001160174	NAT1	2.62157e-11	20.0011	0	protein_coding
NM_001205255	OCLN	2.75924e-12	19.9762	0	protein_coding
NM_198385	CACNA1G	1.0212e-24	19.9626	0	protein_coding
NM_001017528	PRR5	3.2328e-15	19.894	0	protein_coding
NR_037640	HEATR8-TTC4	8.9592e-15	19.8559	0	nonsense_mediated_decay
NM_001127696	ATXN3	2.04508e-11	19.8014	0	protein_coding
NM_001200032	HYAL3	3.15489e-19	19.8004	0	protein_coding
NM_001270508	TNFAIP3	4.752e-09	19.7661	0.678195	protein_coding
NM_003833	MATN4	4.42042e-11	19.7575	0	protein_coding
NM_001098531	RAPGEF3	2.01314e-11	19.7555	0	protein_coding
NM_001197259	ORC3	4.77256e-10	19.7425	0.447453	protein_coding
NM_201536	NDRG2	4.5575e-13	19.7146	0	protein_coding
NM_001163811	WDR81	1.06743e-11	19.7066	0	protein_coding
NR_073607	CLCN5	2.25994e-11	19.6934	0	unannotated_transcripts
NM_001206945	CSPG5	2.8787e-11	19.6688	0	protein_coding
NM_001271168	PCED1A	1.92897e-11	19.6462	0	protein_coding
NM_001144923	TTC26	2.48133e-10	19.6356	0.438005	protein_coding
NM_001272110	PAQR6	9.34568e-11	19.5667	0	protein_coding
NM_001099222	IFT74	5.98877e-10	19.5555	0.600499	protein_coding
NM_001242878	ELP2	1.18945e-11	19.5054	0	protein_coding
NM_001082972	CASC1	1.76604e-11	19.4897	0	protein_coding
NM_001080546	TMEM218	2.77927e-17	19.451	0	protein_coding
NM_001198713	44078	2.7228e-13	19.4091	0	protein_coding
NM_002599	PDE2A	3.1571e-11	19.3123	0	protein_coding
NM_001135592	RPS27A	1.0917e-15	19.3035	0	protein_coding
NM_001258294	NFATC2	1.68126e-39	19.2665	0	protein_coding
NM_181463	MRPL55	1.29494e-10	19.2512	0	protein_coding
NM_212479	ZMYND11	4.39004e-11	19.2347	0	protein_coding
NR_048552	NOL10	1.05671e-10	19.2321	0	protein_coding
NM_001153690	SCOC	3.82975e-17	19.2092	0	protein_coding
NM_007333	KLRC3	2.40338e-10	19.2043	0.438362	protein_coding
NM_001144963	NFKBIL1	2.16064e-10	19.1704	0.441892	protein_coding
NM_001243876	SPHK2	2.18613e-10	19.1522	0.442493	protein_coding
NM_001146009	SLCO5A1	6.05279e-11	19.1335	0	protein_coding
NM_001143681	GSTK1	1.00201e-10	19.1255	0	protein_coding
NM_019021	C11orf71	1.7156e-10	19.1139	0	protein_coding
NM_001256462	CPSF3L	2.81896e-12	19.0773	0	protein_coding
NM_001207040	ETV7	8.49321e-25	19.0768	0	protein_coding
NM_001206884	CTNND1	1.3155e-23	19.0416	0	protein_coding
NR_046266	TBC1D10C	5.0379e-12	19.0388	0	nonsense_mediated_decay
NM_000725	CACNB3	1.3708e-10	19.0198	0	protein_coding
NM_001142317	TXNL4B	7.93958e-11	18.9944	0	protein_coding
NM_001267064	PLEKHB2	2.53654e-10	18.9872	0.453581	protein_coding
NM_001010978	LDLRAD1	1.03308e-20	18.9828	0	protein_coding
NM_004263	SEMA4F	2.94757e-11	18.9825	0	protein_coding
NM_001190267	ATG16L1	1.21296e-15	18.9512	0	protein_coding
NM_001258295	NFATC2	6.15433e-36	18.9151	0	protein_coding
NM_020168	PAK6	2.35071e-10	18.8859	0.599117	protein_coding
NM_001256397	BCO2	6.80222e-13	18.8839	0	protein_coding
NM_153048	FYN	3.3431e-10	18.8403	0.450139	protein_coding
NM_001001549	GRB10	3.73097e-10	18.8124	0.605111	protein_coding
NM_001256324	CACNA1G	5.82695e-23	18.7593	0	protein_coding
NM_001258452	FBXO18	4.48486e-11	18.7449	0	protein_coding
NM_001243241	ZSCAN31	7.84073e-11	18.7436	0	protein_coding
NM_001164372	GPN3	1.00851e-10	18.6914	0	protein_coding
NM_001206769	DLG2	4.61956e-12	18.6849	0	protein_coding
NM_001261464	ADAM15	4.93378e-13	18.6844	0	protein_coding
NM_014387	LAT	2.72739e-11	18.6113	0	protein_coding
NM_001171798	TRIQK	2.26536e-16	18.5849	0	protein_coding
NM_001184789	PARD3	2.11144e-10	18.5346	0	protein_coding
NM_001163322	CCDC120	6.6127e-14	18.5016	0	protein_coding
NM_032523	OSBPL6	2.32093e-10	18.4876	0	protein_coding
NR_024629	IDI2-AS1	2.16625e-09	18.4819	0.437053	lncRNA
NM_001197320	MCL1	3.69464e-11	18.4774	0	protein_coding
NM_001242354	ODF2	5.75541e-10	18.4654	0.595423	protein_coding
NM_181531	BTN2A2	7.2923e-10	18.4523	0.455932	protein_coding
NM_001017958	OS9	7.67726e-14	18.4069	0	protein_coding
NM_001142404	CD164	9.40391e-11	18.3728	0	protein_coding
NM_001256666	FAM193A	9.17276e-11	18.3638	0	protein_coding
NM_014410	CLUL1	4.66024e-14	18.3423	0	protein_coding
NM_138732	NRXN2	3.80929e-11	18.2681	0	protein_coding
NM_001242483	EIF1AD	9.67759e-10	18.2645	0.605023	protein_coding
NM_001135161	COMT	6.87991e-10	18.2469	0.55917	protein_coding
NM_001258247	TMEM218	2.16627e-16	18.2341	0	protein_coding
NR_037840	IL15	9.42814e-11	18.2319	0	protein_coding
NM_017711	GDPD2	9.39426e-11	18.2229	0	protein_coding
NM_198383	CACNA1G	3.54742e-22	18.2218	0	protein_coding
NM_004058	CAPS	3.89434e-10	18.1811	0.434684	protein_coding
NM_001244810	FOXP1	1.2235e-10	18.1793	0	protein_coding
NM_001252120	PASK	9.43323e-18	18.1714	0	protein_coding
NM_001200052	NPL	1.01166e-23	18.1534	0	protein_coding
NM_001244189	KIAA0586	7.88916e-14	18.1486	0	protein_coding
NM_001024212	S100A13	4.96074e-09	18.1379	0.457175	protein_coding
NR_038207	LOC100616530	1.47611e-10	18.0745	0	unannotated_transcripts
NM_174970	ST3GAL3	3.90771e-14	18.0136	0	protein_coding
NM_001204344	TNFSF15	5.70331e-12	18.0088	0	protein_coding
NM_001142364	ALG5	7.64211e-10	17.9901	0.442914	protein_coding
NM_138972	BACE1	1.54723e-10	17.9549	0	protein_coding
NM_032041	NCALD	6.96102e-11	17.9267	0	protein_coding
NM_032403	PCDHGC3	8.90182e-25	17.9075	0	protein_coding
NM_001256463	CPSF3L	4.37178e-10	17.8939	0.454507	protein_coding
NM_018973	DPM3	1.61564e-09	17.8862	0.48605	protein_coding
NM_198706	HSD11B1L	1.52723e-14	17.8857	0	protein_coding
NM_001271868	GTF2H3	6.92803e-11	17.8816	0	protein_coding
NM_199189	MATR3	5.0306e-11	17.8242	0	protein_coding
NM_001204502	FLT3LG	1.38963e-10	17.8173	0	protein_coding
NM_001242927	ZNF410	7.94794e-11	17.796	0	protein_coding
NR_073479	IKZF5	1.74565e-19	17.7441	0	unannotated_transcripts
NM_001193635	DHRS4L2	3.37402e-10	17.7387	0	protein_coding
NM_001202498	UBE2H	9.08432e-15	17.7199	0	protein_coding
NM_032622	LNX1	2.24228e-11	17.713	0	protein_coding
NM_001364	DLG2	4.72405e-12	17.655	0	protein_coding
NM_001270977	IST1	3.13044e-09	17.6544	0.512155	protein_coding
NM_003644	GAS7	9.96902e-11	17.6528	0	protein_coding
NM_007082	RABL2A	3.11318e-11	17.6477	0	protein_coding
NM_001042594	POT1	1.01323e-10	17.6384	0	protein_coding
NM_001203262	NDUFC2-KCTD14	8.08188e-25	17.6247	0	protein_coding
NM_001258222	KCTD1	4.66967e-10	17.6008	0	protein_coding
NM_001098500	KIAA1217	5.64222e-11	17.5882	0	protein_coding
NM_004029	IRF7	1.7208e-10	17.5877	0	protein_coding
NM_001256569	PPFIBP2	2.07331e-10	17.5792	0	protein_coding
NM_001206729	AKT3	9.5704e-11	17.5414	0	protein_coding
NR_024399	SNAI3-AS1	5.44964e-10	17.5381	0	lncRNA
NM_139003	HFE	5.89183e-10	17.5143	0.433504	protein_coding
NM_033339	CASP7	9.5231e-19	17.5056	0	protein_coding
NM_001242775	TMEM139	7.79228e-13	17.4795	0	protein_coding
NM_001142854	SPATC1L	3.73855e-11	17.4524	0	protein_coding
NM_017980	LIMS2	6.74518e-11	17.4484	0	protein_coding
NM_001001579	PDE9A	8.13338e-25	17.4205	0	protein_coding
NM_206837	OSCP1	3.71603e-10	17.4199	0	protein_coding
NM_182985	TRIM69	5.60225e-10	17.4085	0	protein_coding
NM_175841	SMOX	4.07479e-09	17.3932	0.399245	protein_coding
NR_024576	SEC61A2	7.29655e-11	17.3754	0	nonsense_mediated_decay
NM_001144914	FGFR2	3.71918e-24	17.3723	0	protein_coding
NM_001160104	ZC3H14	1.99074e-09	17.3344	0.384418	protein_coding
NM_001083947	TMPRSS4	5.18885e-11	17.3205	0	protein_coding
NM_022743	SMYD3	1.35585e-09	17.2811	0.447149	protein_coding
NM_001029989	KIAA0101	2.16298e-09	17.2716	0.605023	protein_coding
NM_001270942	KLF7	6.46385e-11	17.2564	0	protein_coding
NR_034059	PSMD1	5.94929e-13	17.2384	0	protein_coding
NR_045586	SRA1	1.08261e-09	17.233	0.476319	protein_coding
NM_001167902	PGPEP1L	6.76023e-10	17.2237	0	protein_coding
NM_006051	APBB3	1.22078e-09	17.2235	0.493833	protein_coding
NM_001201547	SLC16A4	1.49225e-10	17.21	0	protein_coding
NM_001025369	VEGFA	3.53677e-10	17.1778	0	protein_coding
NM_001033574	AMZ2	1.37057e-09	17.1592	0.447089	protein_coding
NR_003094	E2F6	4.7917e-14	17.1418	0	unannotated_transcripts
NR_073082	CRIP2	1.76141e-12	17.1312	0	protein_coding
NM_002753	MAPK10	2.21629e-14	17.1118	0	protein_coding
NM_001256171	ZNF85	8.8875e-11	17.0958	0	protein_coding
NM_001257098	RHNO1	7.18511e-20	17.0819	0	protein_coding
NM_001252043	TAOK2	1.17675e-09	17.0554	0.490193	protein_coding
NM_001165979	PLCE1	2.47202e-10	17.046	0	protein_coding
NM_001135247	MFAP2	1.74761e-09	17.0388	0.458358	protein_coding
NM_202494	GIPC1	9.1736e-17	17.0106	0	protein_coding
NM_000116	TAZ	3.97329e-10	17.0097	0	protein_coding
NM_001142403	CD164	1.73292e-14	17.0091	0	protein_coding
NM_139346	BIN1	3.38643e-15	17.0018	0	protein_coding
NM_001146103	PARP9	8.01305e-11	16.9868	0	protein_coding
NM_001199772	PSMA5	1.20063e-09	16.9764	0.480434	protein_coding
NM_001256533	MSTO1	8.02818e-13	16.9723	0	protein_coding
NM_001258242	TMEM218	5.22469e-12	16.9553	0	protein_coding
NM_001168300	KLHL13	2.61703e-11	16.9445	0	protein_coding
NM_002656	PLAGL1	3.29004e-10	16.8955	0	unannotated_transcripts
NR_033702	MYNN	7.02618e-14	16.8953	0	nonsense_mediated_decay
NM_001171192	GDPD2	5.60622e-14	16.8894	0	protein_coding
NM_001206883	CTNND1	2.11644e-24	16.8673	0	protein_coding
NM_001258254	UTY	1.81721e-29	16.8347	0	protein_coding
NM_001161011	ARMC10	5.92082e-16	16.7927	0	protein_coding
NM_020465	NDRG4	4.21324e-18	16.7917	0	protein_coding
NM_001256524	ZNF74	2.21197e-13	16.7665	0	protein_coding
NM_201432	GAS7	1.38845e-10	16.7503	0	protein_coding
NM_198384	CACNA1G	5.24421e-20	16.7477	0	protein_coding
NM_001123378	ADSL	2.77893e-09	16.7461	0.605461	protein_coding
NM_001244735	TMEM126A	1.21574e-09	16.7384	0.456553	protein_coding
NR_024610	HINT1	1.3205e-09	16.7177	0.444906	nonsense_mediated_decay
NM_001270879	MPC1	3.75359e-10	16.7103	0	protein_coding
NR_073553	RAB13	6.85413e-09	16.7081	0.615467	protein_coding
NM_016929	CLIC5	2.81003e-11	16.648	0	protein_coding
NM_001242385	MAK	1.2113e-10	16.6477	0	protein_coding
NM_001193644	PEX19	2.15708e-12	16.6461	0	protein_coding
NM_177948	ARMCX3	6.919e-09	16.6145	0.671722	protein_coding
NM_153254	TTLL10	1.4952e-10	16.601	0	protein_coding
NM_203314	BDH1	1.058e-09	16.5849	0	protein_coding
NM_001033604	BBS9	2.14622e-11	16.5817	0	protein_coding
NM_001270735	BCL2L13	2.40828e-09	16.5589	0.477621	protein_coding
NR_004847	UBE2Q2P2	1.12249e-10	16.5586	0	processed_transcript
NR_004847_1	UBE2Q2P2	1.12249e-10	16.5586	0	unannotated_transcripts
NR_052852	MARCKSL1	1.74239e-08	16.5582	0.669586	unannotated_transcripts
NR_026545	APOO	1.06772e-09	16.5307	0	nonsense_mediated_decay
NM_001144913	FGFR2	7.26491e-22	16.5278	0	protein_coding
NM_000248	MITF	5.76081e-11	16.5174	0	protein_coding
NM_001200030	HYAL3	3.62273e-10	16.5112	0	protein_coding
NM_001165417	SLC25A11	5.48675e-09	16.4506	0.498941	protein_coding
NM_001198807	MSANTD3	4.24487e-10	16.4306	0	protein_coding
NM_001198978	SMAP2	3.42992e-09	16.4175	0.569844	protein_coding
NM_181334	PRR5-ARHGAP8	2.16e-10	16.3931	0	protein_coding
NM_001243798	TSC22D1	7.66934e-09	16.3905	0.421017	protein_coding
NM_001164616	FZD6	4.55516e-09	16.3837	0.479516	protein_coding
NM_001130820	RABL5	1.63403e-09	16.3441	0.384418	protein_coding
NR_036437	KCNC4	4.38397e-11	16.3222	0	nonsense_mediated_decay
NM_001252393	TNIP1	1.61937e-13	16.3161	0	protein_coding
NM_001166270	HAUS4	6.88202e-09	16.3102	0.613769	protein_coding
NM_052987	CDK10	1.55542e-09	16.2918	0.498941	protein_coding
NM_001171091	UBXN6	3.39547e-09	16.2834	0.481354	protein_coding
NM_001271329	MARVELD3	7.96428e-09	16.2802	0.654626	protein_coding
NM_001256327	CACNA1G	2.59378e-19	16.2587	0	protein_coding
NM_001185023	CLDN7	1.14999e-08	16.248	0.63988	protein_coding
NM_001206952	SLC16A3	1.80951e-08	16.2448	0.693361	protein_coding
NM_003688	CASK	6.92613e-10	16.2323	0	protein_coding
NM_001161334	HIST2H2BF	1.02933e-10	16.2224	0	protein_coding
NM_001199017	LRRC49	7.17737e-10	16.1968	0	protein_coding
NM_001160230	ADARB1	1.02591e-10	16.1563	0	protein_coding
NM_001035230	RABGAP1L	7.06122e-14	16.1484	0	protein_coding
NM_001004419	CLEC2D	2.16236e-10	16.1391	0	protein_coding
NM_138929	DIABLO	1.60367e-09	16.124	0.39217	unannotated_transcripts
NM_001242830	ELOVL5	1.09255e-08	16.1238	0.398701	protein_coding
NM_052814	CARD9	5.08424e-10	16.1196	0	protein_coding
NM_203447	DOCK8	3.61943e-11	16.1178	0	protein_coding
NM_017843	BCAS4	1.41245e-09	16.1085	0	protein_coding
NM_001258338	NDUFA12	7.17778e-09	16.1076	0.468904	protein_coding
NR_047556	UBE2V1	4.31224e-24	16.1056	0	unannotated_transcripts
NM_174926	TMEM136	2.5156e-09	16.1053	0.609153	protein_coding
NR_028140	FLJ42289	2.65857e-10	16.0732	0	lncRNA
NM_001161619	DUS3L	1.53325e-09	16.0728	0	protein_coding
NM_001042425	TFAP2A	3.75008e-09	16.0656	0.470698	protein_coding
NM_001195223	ALG1L	3.02925e-10	16.0414	0	protein_coding
NR_045607	UXS1	1.58725e-09	16.0229	0	protein_coding
NR_073377	TPRA1	8.57419e-09	16.0178	0.644548	nonsense_mediated_decay
NM_001166461	MPP1	1.93143e-09	16.0155	0.598772	protein_coding
NM_033629	TREX1	6.20111e-09	16.0049	0.649268	protein_coding
NM_001271937	RMND1	1.42232e-09	16.0004	0	protein_coding
NM_014836	RHOBTB1	6.0906e-15	15.9758	0	protein_coding
NM_001098501	KIAA1217	3.2604e-09	15.9748	0.735891	unannotated_transcripts
NM_001258455	TNIP1	1.13791e-09	15.961	0	protein_coding
NM_001145264	LAMTOR2	6.45478e-09	15.9604	0.451426	protein_coding
NM_014677	RIMS2	5.92994e-11	15.9393	0	protein_coding
NM_001164507	NEB	6.65779e-11	15.9247	0	protein_coding
NM_005265	GGT1	1.4351e-12	15.921	0	unannotated_transcripts
NR_046331	BRSK2	5.87889e-10	15.9174	0	nonsense_mediated_decay
NM_001039659	IL18BP	2.30219e-24	15.9155	0	protein_coding
NM_181652	PRDX5	1.07892e-09	15.891	0	protein_coding
NR_024176	MKNK1	1.77903e-10	15.8731	0	protein_coding
NM_001145255	IKBKG	1.93509e-10	15.8714	0	protein_coding
NM_207038	TCF12	3.36926e-09	15.8694	0.509059	protein_coding
NM_001165887	ZNF268	8.48747e-11	15.8466	0	protein_coding
NM_001085465	CTNND1	1.73238e-10	15.84	0	protein_coding
NM_001242923	EIF3L	1.91751e-08	15.825	0.445269	protein_coding
NM_198329	UBA5	3.39788e-09	15.8239	0.487049	protein_coding
NM_001258298	KIAA1598	1.9615e-19	15.8219	0	protein_coding
NM_001011668	CHCHD7	1.34401e-09	15.8193	0	protein_coding
NM_001243385	PARVB	2.31635e-09	15.7891	0.479779	protein_coding
NM_001276267	DUOXA1	2.40847e-10	15.7779	0	protein_coding
NM_001199899	PDK2	3.27641e-09	15.7645	0.498735	protein_coding
NR_046393	ABR	7.11599e-10	15.7604	0	unannotated_transcripts
NM_198926	FAM212B	3.68467e-09	15.7384	0.679127	protein_coding
NM_001159736	BUD13	2.38874e-09	15.734	0.384103	protein_coding
NM_001127454	DFNA5	3.60796e-10	15.7171	0	protein_coding
NM_183421	FBXO25	2.53549e-14	15.6885	0	protein_coding
NM_001184728	PIGT	2.54016e-15	15.6719	0	protein_coding
NR_046054	CACNA1G	2.20071e-18	15.65	0	nonsense_mediated_decay
NM_025259_4	MSH5	7.60417e-10	15.6488	0	unannotated_transcripts
NM_001012270	BIRC5	1.76765e-08	15.6473	0.771856	protein_coding
NM_001267864	SLIRP	8.39918e-10	15.644	0	protein_coding
NR_036472	ENY2	3.4689e-10	15.6336	0	nonsense_mediated_decay
NM_007244	PRR4	1.29966e-09	15.6324	0	protein_coding
NM_153001	PSMC4	1.13199e-08	15.6158	0.547447	protein_coding
NM_001173464	KIF21A	6.582e-19	15.6057	0	protein_coding
NM_001159677	SYNCRIP	5.13626e-09	15.5994	0.370692	protein_coding
NM_001258305	CCDC74A	1.62884e-10	15.5821	0	protein_coding
NM_001135021	ELMOD3	2.20698e-10	15.565	0	protein_coding
NM_001127582	ING4	1.35497e-09	15.5623	0	protein_coding
NM_172084	CAMK2B	2.55821e-11	15.5613	0	protein_coding
NM_006309	LRRFIP2	1.00208e-10	15.5547	0	protein_coding
NM_198386	CACNA1G	3.22669e-18	15.5383	0	protein_coding
NM_001199158	KAT7	1.02594e-09	15.5365	0	protein_coding
NM_001190233	DNAJC19	6.10538e-10	15.5239	0	protein_coding
NR_038431	LOC100506054	4.68526e-09	15.5212	0.449283	lncRNA
NR_024273	SEC13	6.29424e-09	15.4977	0.484192	unannotated_transcripts
NM_001142799	C17orf49	2.10888e-09	15.4893	0	protein_coding
NR_073544	AXDND1	1.28668e-09	15.4773	0	nonsense_mediated_decay
NM_001171814	OAT	1.39412e-08	15.4675	0.489254	protein_coding
NM_001145850	PROM1	2.06632e-12	15.4639	0	protein_coding
NM_002389	CD46	6.04013e-14	15.4593	0	protein_coding
NM_001271999	DOCK7	1.9268e-13	15.4546	0	protein_coding
NM_001197030	ANKHD1	1.02602e-08	15.4488	0.503416	protein_coding
NM_032263	IQCG	1.80072e-09	15.4337	0	protein_coding
NM_201382	PLEC	1.07163e-09	15.4275	0	protein_coding
NM_001199784	SDCBP2	3.84317e-10	15.4219	0	protein_coding
NM_001204414	TINAGL1	1.14129e-08	15.4132	0.494104	protein_coding
NR_045494	CLU	1.02208e-08	15.3728	0.593375	protein_coding
NM_001163122	RDM1	4.33946e-10	15.3682	0	protein_coding
NM_022088	ZFP64	1.24501e-09	15.363	0	protein_coding
NM_080423	PTPN2	1.50432e-08	15.328	0.527317	protein_coding
NR_047520	LOC643837	1.2412e-09	15.3	0	unannotated_transcripts
NM_199360	TPD52L2	4.07367e-16	15.2855	0	protein_coding
NM_001256810	GRM4	9.16952e-10	15.2735	0	unannotated_transcripts
NM_001260507	RPS3	1.14893e-09	15.2082	0	protein_coding
NM_198382	CACNA1G	1.01876e-17	15.2036	0	protein_coding
NR_046480	ROGDI	1.42813e-09	15.1857	0	nonsense_mediated_decay
NR_073603	ATG12	2.08672e-08	15.1839	0.85186	nonsense_mediated_decay
NM_001168278	WWTR1	4.33285e-09	15.1828	0.53432	protein_coding
NR_073482	ZNF689	6.14426e-09	15.1732	0.405331	unannotated_transcripts
NM_170699	GPBAR1	8.80278e-10	15.1543	0	protein_coding
NM_001136125	CCND3	8.90475e-09	15.1498	0.64216	protein_coding
NM_181742	ORC4	7.39554e-14	15.1443	0	protein_coding
NR_038278	LINC00665	2.55149e-10	15.1417	0	lncRNA
NM_001178010	CDC45	6.57271e-09	15.1411	0.499146	protein_coding
NM_002064	GLRX	1.46614e-08	15.1324	0.686344	protein_coding
NM_001085428	ARSA	1.41388e-09	15.1281	0	protein_coding
NM_001012727	AGPAT2	1.00764e-08	15.1253	0.61048	protein_coding
NM_001166356	SHMT2	1.73041e-09	15.1158	0	protein_coding
NR_034176	RUFY4	5.0037e-10	15.0869	0	nonsense_mediated_decay
NM_182744	NBL1	7.12263e-10	15.0775	0	protein_coding
NM_006732	FOSB	8.75594e-08	15.0764	1.84013	protein_coding
NR_045796	CSE1L	1.19837e-08	15.0574	0.501001	protein_coding
NM_001934	DLX4	1.91273e-09	15.0547	0	protein_coding
NM_001256328	CACNA1G	1.61492e-17	15.0276	0	protein_coding
NM_000933	PLCB4	2.84257e-09	15.0238	0	protein_coding
NR_027356	LOC645166	9.20286e-10	15.0179	0	lncRNA
NM_201431	RASSF6	2.66873e-13	14.9999	0	protein_coding
NM_005822	RCAN2	2.78758e-10	14.9397	0	protein_coding
NM_001142466	GPT2	1.69746e-08	14.9123	0.827251	protein_coding
NM_001256359	CACNA1G	2.56147e-17	14.8896	0	protein_coding
NM_001201478	EIF2D	3.63789e-09	14.8885	0.363763	protein_coding
NM_001174063	FGFR1	2.28443e-09	14.8837	0	protein_coding
NM_031466	TRAPPC9	3.66131e-09	14.8489	0.642732	protein_coding
NM_001267041	ARMC8	2.03735e-09	14.8429	0	protein_coding
NM_001130702	BSCL2	1.30873e-09	14.8408	0	protein_coding
NM_001100122	SBNO2	2.91246e-09	14.7888	0	protein_coding
NR_051967	MRPS2	2.50184e-09	14.7774	0	processed_transcript
NM_001257197	CUL3	2.06756e-09	14.7752	0	protein_coding
NM_203417	RCAN1	2.3502e-09	14.7567	0	protein_coding
NM_001002031	ATP5G2	9.81616e-10	14.7536	0	protein_coding
NM_006928	PMEL	9.5591e-10	14.7468	0	protein_coding
NM_203399	STMN1	9.53906e-08	14.7456	0.538426	protein_coding
NM_001261390	CALCOCO2	1.71694e-09	14.7366	0	protein_coding
NM_001042495	SLC12A6	2.32107e-24	14.7255	0	protein_coding
NM_001127397	ERLEC1	6.27107e-09	14.7205	0.622512	protein_coding
NM_001251980	RCAN3	3.56375e-13	14.7203	0	protein_coding
NM_001099682	MAGIX	3.94103e-10	14.71	0	protein_coding
NR_024601	DIABLO	2.71425e-09	14.7081	0	unannotated_transcripts
NM_001199874	B4GALT3	1.10212e-08	14.7008	0.611011	protein_coding
NM_182666	UBE2E1	5.46738e-09	14.6945	0.462874	protein_coding
NM_001170796	ZFAND1	1.65349e-09	14.6734	0	protein_coding
NM_203497	COMMD6	7.59049e-10	14.6687	0	protein_coding
NM_001142675	CHID1	3.18703e-14	14.6509	0	protein_coding
NM_001142316	LMO2	1.20091e-09	14.6503	0	protein_coding
NM_017779	DEPDC1	2.17036e-09	14.637	0	protein_coding
NM_001243135	PELI3	7.0343e-09	14.6345	0.512649	protein_coding
NR_033683	PCYT2	8.7315e-10	14.6293	0	unannotated_transcripts
NM_001077700	MIER1	4.76575e-09	14.5958	0.603365	protein_coding
NM_001271787	DYNC1I2	7.35823e-10	14.5888	0	protein_coding
NM_001184718	TIPARP	3.36017e-08	14.582	0.487582	protein_coding
NM_001252650	RDH11	1.85255e-08	14.5729	0.7716	protein_coding
NR_023922	DHRS4-AS1	2.56351e-24	14.5704	0	lncRNA
NR_072993	ENKUR	2.13458e-10	14.5639	0	unannotated_transcripts
NM_001244644	CHMP2B	1.92492e-08	14.533	0.853562	protein_coding
NR_027691	PANX2	7.15559e-10	14.5249	0	nonsense_mediated_decay
NM_001252512	SOAT1	2.17219e-14	14.5187	0	protein_coding
NM_001331	CTNND1	9.03716e-10	14.5157	0	protein_coding
NM_001202473	ZNF816-ZNF321P	4.8085e-09	14.4871	0.56687	protein_coding
NM_001134709	DEK	1.0539e-08	14.4868	0.483994	protein_coding
NM_001270896	TRAPPC3	2.07713e-08	14.4804	0.739452	protein_coding
NM_001145724	HOMER3	2.10499e-12	14.4709	0	protein_coding
NM_001130029	RELL2	8.17046e-09	14.4609	0.514847	protein_coding
NM_022356	LEPRE1	7.60448e-09	14.4466	0.66284	protein_coding
NR_046056	CACNA1G	1.40399e-16	14.438	0	nonsense_mediated_decay
NM_001271684	SLC35A3	7.45118e-09	14.4272	0.59329	protein_coding
NM_175625	RAB3IP	2.68822e-08	14.4105	0.815025	protein_coding
NM_001256329	CACNA1G	1.29871e-16	14.397	0	protein_coding
NM_001134666	TRMT10A	4.67509e-09	14.3968	0	protein_coding
NM_133339	RAD17	1.63037e-09	14.3887	0	protein_coding
NM_001127702	SERPINA1	6.6214e-16	14.37	0	protein_coding
NM_032871	RELT	1.54096e-08	14.3692	0.794119	protein_coding
NM_001202404	ALDH7A1	4.52426e-09	14.3627	0	protein_coding
NR_045756	COL25A1	5.56234e-36	14.3513	0	nonsense_mediated_decay
NM_001174104	CD14	4.09136e-16	14.3419	0	protein_coding
NR_072996	MAPK13	1.57996e-08	14.3417	0.929593	protein_coding
NM_001144073	CHORDC1	4.26268e-08	14.3405	0.534171	protein_coding
NM_001257322	APBB1	5.42891e-13	14.319	0	unannotated_transcripts
NM_001271640	ZNF138	6.09041e-10	14.3188	0	protein_coding
NM_020318	PAPPA2	1.7259e-10	14.2968	0	protein_coding
NM_025142	TAOK1	9.51168e-09	14.2939	0.401045	protein_coding
NM_001242339	PFKP	2.86931e-09	14.2937	0	protein_coding
NR_073091	MEAF6	6.68708e-09	14.2937	0.57414	processed_transcript
NM_001195017	CD4	2.58997e-10	14.2925	0	protein_coding
NM_147781	CTSB	8.97953e-10	14.2815	0	protein_coding
NM_175063	EMC10	2.79918e-08	14.2796	0.909037	protein_coding
NM_001145940	PAFAH1B3	3.56772e-09	14.2751	0	protein_coding
NM_001256568	PPFIBP2	1.69888e-10	14.2699	0	protein_coding
NM_145638	OSBPL5	4.09692e-09	14.2568	0	protein_coding
NM_001134388	ZDHHC4	3.09341e-09	14.2558	0	protein_coding
NM_001130005	ACTN1	4.42599e-08	14.25	0.536032	protein_coding
NM_006400	DCTN2	3.66466e-09	14.2354	0	protein_coding
NM_001276389	PLK1S1	1.21722e-08	14.2263	0.606864	protein_coding
NM_001195517	TLX1	1.08183e-11	14.2135	0	protein_coding
NR_027404	HHLA3	1.52974e-09	14.2016	0	nonsense_mediated_decay
NR_028455	ATXN3	6.39939e-15	14.1975	0	nonsense_mediated_decay
NM_001243565	DHDDS	2.3128e-08	14.1928	0.425795	protein_coding
NM_148909	OSBPL9	1.92605e-14	14.1907	0	protein_coding
NM_001144062	COPB1	3.2347e-09	14.1828	0	protein_coding
NM_001202470	RPS10-NUDT3	2.26773e-09	14.1699	0	protein_coding
NM_183401	RNF14	3.59815e-09	14.169	0	protein_coding
NM_030813	CLPB	1.03428e-08	14.1475	0.52542	protein_coding
NM_001166359	SHMT2	2.25835e-08	14.1288	0.423313	protein_coding
NM_001031847	CPT1A	1.74707e-09	14.1185	0	protein_coding
NM_001167971	TRMT2B	7.54021e-12	14.1143	0	protein_coding
NR_028063	GCC2	1.47314e-08	14.0897	0.71287	nonsense_mediated_decay
NM_001164347	ZBTB20	1.3359e-08	14.0799	0.478993	protein_coding
NM_001271971	HSP90AB1	8.7396e-08	14.0793	1.14569	protein_coding
NR_046057	CACNA1G	4.60487e-16	14.0657	0	nonsense_mediated_decay
NM_001160708	POLR3B	8.08018e-09	14.0655	0.695833	protein_coding
NR_028035	FAS	2.39572e-12	14.0638	0	nonsense_mediated_decay
NM_001270490	RPL18	1.57695e-11	14.0624	0	protein_coding
NM_001122824	TACC1	1.36736e-14	14.018	0	protein_coding
NM_001198810	SLC43A1	5.03035e-09	14.0123	0	protein_coding
NM_001077691	ALG9	1.02792e-08	13.9938	0.893129	protein_coding
NM_001190947	TRAF1	2.87153e-09	13.9926	0	protein_coding
NM_001193300	SEMA4A	1.29246e-09	13.9801	0	protein_coding
NM_001159936	EBNA1BP2	1.2078e-09	13.9732	0	protein_coding
NM_001164730	REEP1	2.42827e-09	13.9515	0	protein_coding
NM_014323	PATZ1	1.11031e-08	13.95	0.421647	protein_coding
NM_022963	FGFR4	1.33992e-08	13.9352	0.628009	protein_coding
NM_133266	SHANK2	1.62789e-10	13.927	0	protein_coding
NM_016488	PPHLN1	8.40908e-09	13.9258	0.481684	protein_coding
NM_198388	CACNA1G	6.94031e-16	13.9225	0	protein_coding
NM_001105563_4	CCHCR1	5.2713e-09	13.9075	0	unannotated_transcripts
NM_001165962	ELAC2	1.20644e-12	13.9057	0	protein_coding
NM_001037290	BCO2	4.94926e-09	13.9044	0	protein_coding
NR_074080	MAZ	3.47391e-08	13.8989	0.451733	protein_coding
NM_001014837_1	CUTA	1.35074e-08	13.8822	0.595081	unannotated_transcripts
NM_020682	AS3MT	7.87777e-09	13.882	0.550136	protein_coding
NM_001244846	CHEK1	5.43782e-09	13.876	0	protein_coding
NM_001083926	ASRGL1	2.52137e-09	13.8692	0	protein_coding
NM_032483	PPAPDC1B	1.50805e-09	13.865	0	protein_coding
NM_001099339	COMMD7	5.74299e-09	13.8528	0	protein_coding
NM_201378	PLEC	2.05762e-08	13.8461	0.700384	protein_coding
NR_024584	LOC728875	5.96561e-10	13.8387	0	unannotated_transcripts
NR_049786	SNX17	1.12725e-14	13.8353	0	nonsense_mediated_decay
NR_073156	HAUS7	2.84146e-10	13.8317	0	unannotated_transcripts
NM_145074	HTRA2	1.08438e-09	13.8276	0	protein_coding
NM_001193533	NEK4	2.35102e-08	13.823	0.759201	protein_coding
NM_001202425	ZNF559-ZNF177	1.19512e-20	13.8174	0	protein_coding
NM_152528	WDSUB1	6.49881e-09	13.8036	0	protein_coding
NR_030767	ANKRD13D	2.72639e-09	13.7967	0	unannotated_transcripts
NM_001040126	PQLC2	1.03789e-08	13.7847	0.64618	protein_coding
NM_001271769	AP3B1	9.5558e-09	13.7789	0.691542	protein_coding
NR_047553	UBE2V1	4.30429e-18	13.7733	0	unannotated_transcripts
NM_001007073	RPL32	3.99088e-09	13.7631	0	protein_coding
NM_001083589	E2F5	1.5727e-08	13.7606	0.447758	protein_coding
NM_001172766	FOXP2	1.38659e-09	13.7583	0	protein_coding
NM_001258256	UTY	1.10793e-17	13.7395	0	protein_coding
NR_073366	DNAJC10	1.57827e-09	13.7362	0	retained_intron
NR_046308	TSPO	4.81092e-08	13.7308	0.487316	protein_coding
NR_046381	ZNF195	5.72204e-08	13.729	0.671926	nonsense_mediated_decay
NM_001114133	SYNPO2L	1.63245e-09	13.7208	0	protein_coding
NM_001198909	ATP6V1F	3.16585e-09	13.7151	0	protein_coding
NM_033001	GTF2I	2.59405e-08	13.7129	0.534023	protein_coding
NM_001145394	TSEN2	1.34897e-08	13.7092	0.523241	protein_coding
NM_019103	ZMAT5	1.23993e-08	13.7077	0.619427	protein_coding
NM_001242840	GUK1	1.6995e-08	13.6899	0.521289	protein_coding
NM_080662	PEX11G	4.9994e-09	13.6838	0	protein_coding
NM_004484	GPC3	1.87542e-09	13.6769	0	protein_coding
NM_001204858	TCEB1	3.58788e-14	13.6723	0	protein_coding
NM_001004019	FBLN2	1.92596e-12	13.6678	0	protein_coding
NM_153426	PITX2	5.18945e-13	13.6667	0	protein_coding
NM_001039847	GPX4	8.47673e-09	13.6539	0.30945	protein_coding
NM_001011724	HNRNPA1L2	2.167e-08	13.6462	0.800519	protein_coding
NM_001198939	DTNA	2.57298e-15	13.6344	0	protein_coding
NM_194442	LBR	2.42597e-08	13.615	0.681519	protein_coding
NM_001257972	CTSL1	4.56222e-09	13.6022	0	protein_coding
NM_183372_1	NBPF11	5.20879e-14	13.5845	0	unannotated_transcripts
NM_001271970	HSP90AB1	3.86514e-07	13.5811	0.634418	protein_coding
NM_001258324	TP53I11	3.3767e-08	13.5622	0.598255	protein_coding
NM_001270377	ANKRD46	2.16762e-09	13.5573	0	protein_coding
NM_001171796	TRIQK	1.50184e-09	13.5557	0	protein_coding
NR_024091	ZFP91-CNTF	2.41244e-14	13.5522	0	nonsense_mediated_decay
NM_001199973	RPL36A-HNRNPH2	3.57944e-08	13.5497	0.393887	protein_coding
NM_182907	PRDM1	1.29801e-08	13.5457	0.73743	protein_coding
NM_000511	FUT2	2.67691e-08	13.5409	0.721704	protein_coding
NM_001127482	SPRYD7	2.46916e-09	13.5389	0	protein_coding
NM_019859	HTR7	3.16154e-09	13.5367	0	protein_coding
NM_001206836	RAB11A	6.75579e-08	13.5337	0.486583	protein_coding
NM_001256531	TSPO	6.0316e-09	13.5277	0	protein_coding
NM_001024666	SH3KBP1	9.53844e-10	13.5251	0	protein_coding
NM_001130103	COL13A1	1.92473e-18	13.5202	0	protein_coding
NM_001003688	SMAD1	3.12709e-08	13.5128	0.804792	protein_coding
NM_006162	NFATC1	8.34983e-09	13.5122	0	protein_coding
NR_046448	LOC374443	1.9236e-18	13.5091	0	lncRNA
NR_027716	H2AFJ	1.22396e-09	13.5052	0	nonsense_mediated_decay
NM_001145305	KIAA1683	6.18245e-09	13.5039	0	protein_coding
NM_001113511	ARHGEF7	1.03678e-12	13.5005	0	protein_coding
NR_024005	DDX11L2	3.82191e-09	13.4992	0	processed_transcript
NM_001204880	UBE2D1	9.89194e-09	13.4932	0.610302	protein_coding
NM_001042474	ZNF565	1.25101e-17	13.4895	0	protein_coding
NM_199482	MOB4	8.95063e-15	13.4845	0	protein_coding
NM_001198615	MAP7	3.51386e-08	13.4733	0.427477	protein_coding
NM_001114397	DHX36	3.88833e-08	13.4731	0.72642	protein_coding
NM_139009	HFE	1.15287e-10	13.4623	0	protein_coding
NM_001128143	PMS1	3.87591e-08	13.4478	0.552687	protein_coding
NM_001199853	AK3	1.1356e-09	13.4458	0	protein_coding
NM_001114974	SMTNL2	1.17961e-09	13.4288	0	protein_coding
NM_001199014	STPG1	4.07759e-09	13.4286	0	protein_coding
NM_001244713	RAD23B	6.64764e-09	13.4225	0	protein_coding
NM_001166358	SHMT2	3.22147e-09	13.4224	0	protein_coding
NM_201539	NDRG2	2.43853e-13	13.3944	0	protein_coding
NM_001204402	PRPS1	2.65205e-09	13.3901	0	nonsense_mediated_decay
NM_001077415	CRELD1	1.09955e-09	13.3876	0	protein_coding
NM_001127398	ERLEC1	1.80407e-08	13.3858	0.738143	protein_coding
NR_038457	NAPA	1.07222e-08	13.3815	0.621693	nonsense_mediated_decay
NM_001242442	GRB7	2.33155e-09	13.3796	0	protein_coding
NM_001040183	CLDND1	2.25849e-08	13.3778	0.586281	protein_coding
NM_001127889	SPG21	3.50688e-08	13.372	0.449527	protein_coding
NR_037660	POC1B	3.57698e-09	13.372	0	protein_coding
NM_001099754	SYBU	1.17687e-09	13.3693	0	protein_coding
NM_001271819	ORAI2	1.2795e-08	13.3662	0.769934	protein_coding
NM_005437	NCOA4	4.24508e-08	13.3586	0.513074	protein_coding
NM_001075099	SKAP1	1.70101e-08	13.3411	0.706196	protein_coding
NR_033949	P2RX7	2.58954e-20	13.331	0	protein_coding
NM_001168368	GALNT16	3.35366e-10	13.3158	0	protein_coding
NM_003684	MKNK1	8.14857e-09	13.315	0	protein_coding
NM_203488	ACYP1	1.7968e-09	13.3001	0	unannotated_transcripts
NM_001276479	LONP1	6.20553e-09	13.2903	0	protein_coding
NM_001165928	DAG1	6.06582e-11	13.2902	0	protein_coding
NM_001160124	KLF6	3.55554e-09	13.2778	0	protein_coding
NM_001267782	AMBRA1	9.21949e-09	13.2508	0	protein_coding
NM_001195098	ANKRD28	2.2938e-08	13.2503	0.505289	protein_coding
NM_001006621	MAPKAP1	3.99597e-09	13.2453	0	protein_coding
NM_001167931	IL1RAP	2.25158e-10	13.2274	0	protein_coding
NR_048562	SHMT2	1.27755e-09	13.2204	0	nonsense_mediated_decay
NM_170711	DAZAP1	5.18701e-09	13.2174	0	protein_coding
NM_005660	SLC35A2	4.93469e-09	13.2159	0	protein_coding
NM_001256909	CYBRD1	5.99649e-09	13.2016	0	protein_coding
NM_138495	ATXN7L1	3.51392e-08	13.2015	0.521217	protein_coding
NR_073554	CDK5RAP2	2.59763e-11	13.1939	0	protein_coding
NM_001265605	MORF4L1	4.99045e-08	13.1877	0.664442	protein_coding
NM_001254755	CYB5D2	7.35502e-09	13.1858	0	protein_coding
NM_001012762	CTU2	2.98941e-08	13.1849	0.619427	protein_coding
NM_001143943	EFCAB2	2.78711e-09	13.1836	0	protein_coding
NR_038150	UBR7	4.33504e-09	13.1814	0	nonsense_mediated_decay
NR_038294	LOC100507173	1.89396e-08	13.1806	0.484722	lncRNA
NM_001173513	TXNRD3	2.5444e-08	13.1709	0.8173	protein_coding
NM_001243147	NVL	1.53939e-09	13.1625	0	protein_coding
NM_031213	FAM108A1	1.28822e-09	13.1608	0	protein_coding
NM_001270363	RAD23A	1.38712e-08	13.1585	0.569844	protein_coding
NM_001258456	TNIP1	3.71027e-09	13.1543	0	protein_coding
NM_001098173	PRDM7	6.24547e-10	13.1502	0	protein_coding
NM_181801	UBE2C	1.80568e-09	13.1426	0	protein_coding
NM_153742	CTH	1.37829e-08	13.1319	0.435393	protein_coding
NM_001252065	SYT7	3.37864e-08	13.1221	0.909389	protein_coding
NM_000142	FGFR3	3.6674e-09	13.1148	0	protein_coding
NM_032547	SCOC	7.54757e-13	13.1114	0	protein_coding
NM_001258399	CCDC103	3.40661e-14	13.1071	0	protein_coding
NR_003501	EARS2	4.70009e-08	13.1042	0.615647	nonsense_mediated_decay
NM_002189	IL15RA	2.81253e-09	13.0804	0	protein_coding
NM_001772	CD33	1.80969e-09	13.0742	0	protein_coding
NM_001204094	MOB4	2.06033e-12	13.0741	0	protein_coding
NM_001256482	EPHX2	4.29669e-14	13.0737	0	protein_coding
NM_018727	TRPV1	2.46947e-08	13.0586	0.736127	protein_coding
NM_001243254	DENND5A	4.13847e-08	13.0504	0.585612	protein_coding
NR_049778	ZNF385B	1.33378e-09	13.049	0	unannotated_transcripts
NR_074078	RGS3	5.61055e-09	13.0442	0	unannotated_transcripts
NM_001244734	MARVELD2	4.06919e-08	13.0421	0.740048	protein_coding
NM_001193475	PPP1R21	2.26633e-08	13.0421	0.49655	protein_coding
NM_001099753	SYBU	1.49993e-09	13.0311	0	protein_coding
NR_038133	CHN1	1.25953e-09	13.0284	0	nonsense_mediated_decay
NM_001195536	CHMP5	1.13091e-08	13.023	0	protein_coding
NM_001206704	SP100	1.83795e-09	13.0191	0	protein_coding
NM_001145462	YIF1B	1.85485e-08	13.0159	0.496618	protein_coding
NM_001153663	SCOC	1.26512e-15	13.0156	0	protein_coding
NM_001195053	DDIT3	1.9189e-07	13.0038	0.529884	protein_coding
NM_001271856	GRASP	1.82901e-09	13.0004	0	protein_coding
NM_005888	SLC25A3	4.00405e-09	13	0	protein_coding
NM_001143940	LGSN	1.13995e-10	12.9969	0	protein_coding
NM_001080951	PLAGL1	1.42915e-08	12.9784	0.602842	protein_coding
NM_014031	SLC27A6	1.53933e-09	12.9734	0	protein_coding
NM_001271786	DYNC1I2	5.77153e-10	12.9732	0	protein_coding
NM_001242928	ZNF410	5.34838e-14	12.972	0	protein_coding
NM_001160367	CDK10	4.25404e-08	12.9558	0.614126	protein_coding
NM_001003802	SMARCD3	5.71697e-09	12.9466	0	protein_coding
NR_046035	CXCL1	4.9631e-07	12.9409	0.606776	protein_coding
NM_001128919	MARK3	1.17823e-08	12.9341	0	protein_coding
NM_001193425	SUV39H2	5.82425e-09	12.9336	0	protein_coding
NM_001271285	FAM173A	3.45283e-08	12.9328	0.662142	protein_coding
NM_001145853	WFS1	1.61775e-08	12.9317	0.782648	protein_coding
NM_198901	SRI	3.17009e-08	12.9292	0.718172	protein_coding
NM_033355	CASP8	6.86514e-09	12.9201	0	protein_coding
NM_000456	SUOX	2.40663e-09	12.9175	0	protein_coding
NM_012267	HSPBP1	3.93812e-08	12.9101	0.794525	protein_coding
NM_020432	PHTF2	1.67988e-08	12.9085	0.719194	protein_coding
NM_001122827	ESRP1	7.19652e-08	12.9069	0.544927	protein_coding
NM_015401	HDAC7	2.07217e-08	12.9052	0.493563	protein_coding
NR_045999	CCNDBP1	8.23114e-09	12.8921	0	nonsense_mediated_decay
NM_139343	BIN1	1.80903e-21	12.8856	0	protein_coding
NM_001164391	MTF2	4.83406e-09	12.8816	0	protein_coding
NM_025078	PQLC1	1.48136e-08	12.8764	0.414765	protein_coding
NM_001009939	44079	7.72822e-09	12.8744	0	protein_coding
NM_001204182	NEK2	4.20431e-09	12.8712	0	protein_coding
NM_182480	COQ6	2.85947e-09	12.8592	0	protein_coding
NM_181746	CERS2	6.36943e-08	12.8578	0.912929	protein_coding
NM_001199865	KIF16B	1.25053e-08	12.8545	0	protein_coding
NM_001142525	BHLHB9	6.08057e-09	12.8438	0	protein_coding
NM_001024943	ASL	9.3994e-08	12.8399	0.925732	protein_coding
NM_014491	FOXP2	1.85573e-09	12.8394	0	protein_coding
NM_172232	ABCA5	3.08908e-10	12.8306	0	protein_coding
NR_024134	GHRL	6.77534e-18	12.8207	0	unannotated_transcripts
NR_033810	CYP3A5	1.09631e-08	12.8176	0	unannotated_transcripts
NM_139070	MAPK9	1.68689e-08	12.8095	0.651111	protein_coding
NM_174963	ST3GAL3	3.36198e-34	12.8082	0	protein_coding
NM_001258265	UTY	4.70647e-09	12.8075	0	protein_coding
NM_001198783	POU2F1	1.2232e-09	12.806	0	protein_coding
NR_033815	ALS2CL	6.16944e-09	12.8036	0	protein_coding
NM_153759	DNMT3A	1.50259e-08	12.7993	0.501345	protein_coding
NM_001272043	RPS6KB1	1.29567e-16	12.7921	0	protein_coding
NR_073189	HRK	3.08306e-09	12.7871	0	unannotated_transcripts
NM_001114752	CD55	2.06293e-08	12.7799	0.435689	protein_coding
NM_001165895	CD320	8.59116e-08	12.7791	0.579055	protein_coding
NM_001201564	PLRG1	3.96247e-08	12.7663	0.541211	protein_coding
NR_073517	PIK3R2	8.57703e-09	12.7648	0	protein_coding
NM_001146706	KDM5D	6.83841e-09	12.7498	0	protein_coding
NM_148901	TNFRSF18	2.92251e-08	12.7434	0.450384	protein_coding
NM_001267552	PEMT	6.395e-12	12.7346	0	protein_coding
NM_001134779	IPO11	6.21773e-09	12.7204	0	protein_coding
NR_024533	ALG3	4.84002e-08	12.717	0.609949	nonsense_mediated_decay
NM_020816	KIF17	3.91391e-09	12.7086	0	protein_coding
NM_001204514	KIFAP3	2.9608e-09	12.7002	0	protein_coding
NR_028027	CREBZF	1.01033e-08	12.6942	0	nonsense_mediated_decay
NM_001267063	PLEKHB2	7.59823e-09	12.682	0	protein_coding
NM_001102668	PSMA4	6.13984e-08	12.6707	0.740645	protein_coding
NM_001025580	AMMECR1	1.43461e-08	12.663	0	protein_coding
NM_001276378	LZTFL1	8.96713e-09	12.66	0	protein_coding
NM_006007	ZFAND5	3.89604e-07	12.633	0.766369	protein_coding
NM_001195800	LDLR	3.66542e-09	12.6294	0	protein_coding
NM_001271634	RQCD1	3.56711e-09	12.6228	0	protein_coding
NM_001199323	BLOC1S5	5.26605e-13	12.6192	0	protein_coding
NM_001164269	RAD51	2.69745e-08	12.6031	0.576426	protein_coding
NM_001242493	FAM156A	7.36691e-10	12.5894	0	protein_coding
NM_024841	PRR5L	9.26913e-14	12.5885	0	protein_coding
NM_001145348	KDM8	1.65234e-08	12.5878	0	protein_coding
NM_001127457	CRY2	1.07051e-08	12.587	0	protein_coding
NM_001265580	FAM13A	9.63805e-09	12.5837	0	protein_coding
NR_027638	ADAM9	1.03808e-07	12.5793	1.30321	nonsense_mediated_decay
NM_001017974	P4HA2	2.59838e-08	12.5558	0.656394	protein_coding
NM_001079866	BCS1L	2.70591e-08	12.5473	0.666855	protein_coding
NM_139345	BIN1	8.45537e-18	12.5437	0	protein_coding
NM_004536	NAIP	3.51109e-09	12.543	0	protein_coding
NM_133168	OSCAR	9.90353e-12	12.5414	0	protein_coding
NM_001127325	MAD2L2	1.07358e-08	12.5411	0	protein_coding
NM_022342	KIF9	4.67169e-09	12.5372	0	protein_coding
NM_001135729	TOM1	5.10388e-12	12.5314	0	protein_coding
NM_001276276	MAZ	6.23956e-11	12.5096	0	protein_coding
NR_072994	PPP1R10	2.62229e-07	12.5075	0.606688	protein_coding
NR_038328	TEKT4P2	7.21052e-09	12.5017	0	processed_transcript
NM_001270392	RASSF6	5.03671e-09	12.499	0	protein_coding
NM_001207033	RNF40	3.17426e-08	12.4963	0.381324	protein_coding
NM_001025235	TSPAN4	5.76106e-13	12.4948	0	protein_coding
NM_001258447	TOP1MT	8.12289e-08	12.4947	0.780809	protein_coding
NR_052019	SNAPIN	4.11414e-08	12.4906	0.436816	processed_transcript
NM_201222	MAGED2	5.2575e-09	12.4674	0	protein_coding
NM_001127357	PHTF2	4.50486e-10	12.4585	0	protein_coding
NM_001077511_6	TCF19	1.96129e-08	12.4582	0.63311	unannotated_transcripts
NR_045998	CCNDBP1	8.34528e-14	12.4574	0	nonsense_mediated_decay
NM_001242369	CACFD1	1.26009e-12	12.4571	0	protein_coding
NM_001114176	AEBP2	9.68306e-08	12.4546	0.602408	protein_coding
NM_001114100	SEZ6L2	3.73435e-08	12.4472	0.668674	protein_coding
NM_001244974	PPP1CC	1.81858e-08	12.4224	0	protein_coding
NM_001164115	CASS4	7.89301e-72	12.4203	0	protein_coding
NR_073112	SERPINB1	1.18354e-08	12.415	0	protein_coding
NM_001171819	PPARD	9.99454e-11	12.4086	0	protein_coding
NM_001185094	NIT1	6.74581e-09	12.3918	0	protein_coding
NM_006091	CORO2B	1.31954e-08	12.3899	0	protein_coding
NR_027708	IDI2-AS1	6.78413e-09	12.3889	0	lncRNA
NM_001024216	FBLIM1	2.50309e-08	12.3879	0.826086	protein_coding
NM_133335	WHSC1	1.05687e-07	12.3865	0.647721	protein_coding
NM_001134440	ZNF502	9.05447e-09	12.3733	0	protein_coding
NM_001243812	CACNA1B	4.7485e-09	12.3723	0	protein_coding
NM_001145514	SCRN1	5.17935e-08	12.3712	0.540608	protein_coding
NM_001207053	KLK7	4.03224e-08	12.3683	0.576672	protein_coding
NM_001161363	NPTN	2.82956e-08	12.3677	0.728507	protein_coding
NM_001199855	AK3	9.33847e-10	12.3664	0	protein_coding
NM_001014449	DDX19B	3.49644e-09	12.3583	0	protein_coding
NM_032298	SYT3	7.98868e-09	12.3546	0	protein_coding
NR_046070	CHD1L	1.19549e-07	12.3523	0.712534	nonsense_mediated_decay
NM_001146337	AFAP1L1	8.48e-09	12.3443	0	protein_coding
NR_073500	SZRD1	3.63795e-08	12.3355	0.460673	unannotated_transcripts
NM_001145110	NELL2	4.15612e-09	12.3303	0	protein_coding
NM_001135753	ECD	1.42946e-07	12.3272	0.597911	protein_coding
NM_001024938	SLC2A11	4.14917e-08	12.3238	0.70082	protein_coding
NM_017984	ZCWPW1	3.51541e-09	12.323	0	protein_coding
NM_138385	TMEM129	9.42618e-09	12.3229	0	protein_coding
NM_001127695	CTSA	1.50698e-08	12.3102	0	protein_coding
NR_073056	SLC16A7	1.58201e-14	12.3053	0	nonsense_mediated_decay
NM_001010935	RAP1A	3.76778e-09	12.2993	0	protein_coding
NR_037606	MRPS14	1.60892e-08	12.2921	0	protein_coding
NR_046408	FN3KRP	4.39571e-09	12.2914	0	nonsense_mediated_decay
NR_034105	CRNDE	5.41847e-09	12.2851	0	lncRNA
NM_173192	KCNIP2	1.58903e-16	12.2834	0	protein_coding
NM_001042595	TMEM91	2.19712e-08	12.277	0.453457	protein_coding
NM_004580	RAB27A	3.59905e-08	12.2749	0.645124	protein_coding
NR_024138	GHRL	1.98736e-17	12.2661	0	unannotated_transcripts
NM_014098	PRDX3	1.39012e-07	12.2658	0.642923	unannotated_transcripts
NM_001170585	PLB1	1.89131e-09	12.265	0	protein_coding
NM_001113349	ECE1	6.10116e-08	12.2633	0.602755	protein_coding
NM_001258423	SMS	5.82593e-09	12.2629	0	protein_coding
NM_198204	MLX	2.61576e-08	12.2539	0.587288	protein_coding
NM_003032	ST6GAL1	7.2983e-09	12.2501	0	protein_coding
NM_148913	ABHD11	3.83003e-08	12.2439	0.763337	protein_coding
NM_001168393	CREBRF	3.42508e-08	12.2439	0.885556	protein_coding
NM_001204833	ANO10	1.26442e-08	12.2417	0	protein_coding
NM_001101417	ISPD	4.57281e-09	12.2272	0	protein_coding
NM_001271888	CIB2	2.60404e-08	12.2248	0.725496	protein_coding
NM_001130710	LSM5	2.04765e-09	12.2196	0	protein_coding
NM_001040444	PHF11	8.74701e-09	12.2195	0	protein_coding
NM_001004426	PLA2G6	1.46338e-08	12.2093	0	protein_coding
NM_001080976	DSE	9.72624e-09	12.2051	0	protein_coding
NM_182849	CCNB1IP1	1.06123e-08	12.2045	0	protein_coding
NR_027427	TATDN1	6.02931e-09	12.202	0	nonsense_mediated_decay
NM_001199851	DAP3	9.35712e-08	12.1886	0.645411	protein_coding
NM_001256196	ARAF	5.59523e-09	12.1854	0	protein_coding
NM_001201365	RNF14	1.56451e-08	12.1655	0	protein_coding
NM_024054	C7orf25	9.36549e-08	12.1612	0.646468	protein_coding
NM_001035260	VPS26A	4.23387e-08	12.1585	0.770318	protein_coding
NM_001165418	SLC25A11	2.27829e-08	12.158	0	protein_coding
NM_001174092	TMEM185A	2.68791e-09	12.1517	0	protein_coding
NM_031423	NUF2	1.16442e-08	12.1397	0	protein_coding
NM_001143971	CDYL	1.91826e-08	12.1396	0	protein_coding
NM_001099437	ZNF30	1.17774e-08	12.1372	0	protein_coding
NM_001034194	EXOSC9	1.5159e-08	12.1235	0	protein_coding
NM_001017373	SAMD3	1.82907e-09	12.118	0	protein_coding
NM_130800	MEN1	1.32474e-08	12.1174	0	protein_coding
NR_048555	PSMD9	1.99214e-08	12.1125	0	protein_coding
NM_001256468	KAT6B	3.19882e-09	12.1042	0	protein_coding
NM_013334	GMPPB	1.79028e-08	12.1042	0	protein_coding
NM_001242894	ZKSCAN3	1.85806e-08	12.0993	0	protein_coding
NM_015846	MBD1	1.93719e-20	12.0969	0	protein_coding
NM_001242856	ARFIP2	2.93676e-13	12.0938	0	protein_coding
NM_001145838	MTFR1	9.70643e-08	12.0938	0.610657	protein_coding
NM_002767	PRPSAP2	1.89667e-08	12.0906	0	protein_coding
NM_001012634	IL32	3.21144e-08	12.0692	0.602842	protein_coding
NM_001199975	UQCRB	1.0998e-09	12.0645	0	protein_coding
NM_198232	RNASE1	1.77242e-08	12.0632	0	protein_coding
NM_001261380	SLC6A9	1.67681e-09	12.0586	0	protein_coding
NM_006986	MAGED1	5.90082e-08	12.0471	0.79956	protein_coding
NM_001167865	NSMCE4A	5.26902e-08	12.0421	0.669079	protein_coding
NM_001130036	PLEKHB1	8.04699e-09	12.0395	0	protein_coding
NM_001184986	NDUFC1	7.15695e-12	12.0379	0	protein_coding
NR_073126	AKR1E2	1.93835e-09	12.0354	0	nonsense_mediated_decay
NM_138763	BAX	7.36845e-08	12.0331	0.602147	protein_coding
NM_001008211	OPTN	2.03958e-08	12.0313	0	protein_coding
NM_001191022	CTCF	1.23754e-09	12.0308	0	protein_coding
NM_006677	USP19	1.54802e-08	12.0296	0	protein_coding
NM_001165927	MKS1	1.19842e-08	12.0239	0	protein_coding
NM_176895	PPAP2A	1.00083e-08	12.0204	0	protein_coding
NM_001257989	TYMP	1.84012e-08	12.0164	0	protein_coding
NR_046110	LOC440894	1.83e-08	12.0138	0	lncRNA
NR_003105	ZWILCH	9.31962e-09	12.0127	0	unannotated_transcripts
NM_015945	SLC35C2	1.83219e-08	12.0062	0	protein_coding
NM_001193343	MRPS18A	1.1773e-07	12.0025	0.615199	protein_coding
NM_001040633	PRKAG2	4.47939e-09	12.0023	0	protein_coding
NM_032471	PKIB	2.02965e-08	11.9994	0	protein_coding
NM_005873	RGS19	2.19334e-08	11.9991	0	protein_coding
NM_001193509	TTC27	5.87637e-09	11.9979	0	protein_coding
NM_001184943	FAM219A	3.54075e-11	11.9915	0	protein_coding
NM_024918	DSN1	7.689e-08	11.9914	0.64859	protein_coding
NM_001040194	AGTRAP	9.70172e-08	11.9856	0.907982	protein_coding
NM_181307	MRPL52	5.91372e-09	11.9843	0	protein_coding
NM_001248011	NUDT9	2.63303e-08	11.9812	0.55029	protein_coding
NM_001136015	ANXA2	9.79865e-09	11.9773	0	protein_coding
NR_073558	CDK5RAP2	6.16434e-09	11.9772	0	protein_coding
NM_003457	ZNF207	1.38956e-07	11.9752	0.671824	protein_coding
NM_001139488	RASGRP3	1.27931e-09	11.9636	0	protein_coding
NM_001127205	HMOX2	2.12452e-08	11.9632	0	protein_coding
NR_024600	DIABLO	2.04656e-08	11.963	0	unannotated_transcripts
NR_049741	SIKE1	2.85457e-08	11.9528	0.502794	protein_coding
NM_001174127	SLC11A2	4.54318e-08	11.9509	0.87844	protein_coding
NM_001083314	CHMP1A	1.28246e-07	11.9465	0.665144	protein_coding
NM_001042470	SUMF2	3.10907e-08	11.9387	0.426316	protein_coding
NM_001159642	BNIPL	9.36345e-09	11.9359	0	protein_coding
NM_001184700	UGDH	8.86922e-10	11.9295	0	protein_coding
NM_001194937	POGZ	1.53452e-07	11.9265	0.369064	protein_coding
NM_020478	ANK1	9.58953e-14	11.9155	0	protein_coding
NM_005427	TP73	3.64564e-09	11.9145	0	protein_coding
NM_001272012	ITPRIP	8.82726e-09	11.9122	0	protein_coding
NM_001193455	NSUN2	2.62907e-08	11.9034	0	protein_coding
NM_207170	SYF2	3.46528e-09	11.899	0	protein_coding
NM_130801	MEN1	3.34103e-08	11.888	0.631341	protein_coding
NM_001153635	SCOC	1.74645e-14	11.8875	0	protein_coding
NM_001012632	IL32	2.64647e-08	11.8847	0	protein_coding
NR_046136	FAM91A2	3.91511e-09	11.8797	0	unannotated_transcripts
NM_006749	SLC20A2	7.38279e-09	11.8769	0	protein_coding
NR_045573	ISYNA1	9.01585e-08	11.8734	0.595508	protein_coding
NM_001164279	SLC37A4	4.17467e-09	11.8702	0	protein_coding
NR_047524	LOC643837	2.33071e-08	11.8585	0	lncRNA
NM_001271667	DTNBP1	4.9665e-09	11.852	0	protein_coding
NM_001160407	TLCD1	5.79666e-08	11.8505	0.350324	protein_coding
NM_199362	TPD52L2	9.88449e-14	11.8482	0	protein_coding
NM_001136570	FAM47E	9.05506e-22	11.8459	0	protein_coding
NM_003933	BAIAP3	1.23686e-15	11.8408	0	protein_coding
NM_001195015	CD4	4.2473e-10	11.8373	0	protein_coding
NM_001242463	FBXO32	6.77028e-09	11.8312	0	protein_coding
NM_007011	ABHD2	9.05517e-09	11.8308	0	protein_coding
NM_001184977	UQCC	8.05704e-08	11.8307	0.586784	protein_coding
NM_001161364	NPTN	2.61449e-08	11.823	0	protein_coding
NM_001243203	RANBP6	8.68299e-09	11.8221	0	protein_coding
NM_001256331	CACNA1G	2.13489e-14	11.8149	0	protein_coding
NM_001080855	PXN	1.4532e-08	11.8145	0	protein_coding
NM_001258463	PAX6	1.27002e-09	11.8116	0	protein_coding
NM_001013837	MAD1L1	8.79988e-08	11.8093	0.603016	protein_coding
NM_199039	KLHL5	2.25199e-08	11.8076	0	protein_coding
NM_001017535	VDR	1.55178e-08	11.7857	0	protein_coding
NM_001256675	STOML1	2.66861e-09	11.7785	0	protein_coding
NM_022908	NT5DC2	2.9531e-09	11.7746	0	protein_coding
NM_020480	ANK1	1.36307e-09	11.7683	0	protein_coding
NM_001256333	CACNA1G	4.63631e-12	11.7655	0	protein_coding
NM_198269	HIPK1	7.22559e-09	11.745	0	protein_coding
NM_001193657	C17orf62	1.72222e-08	11.7399	0	protein_coding
NM_001184701	UGDH	4.90811e-08	11.7387	0.537377	protein_coding
NM_001143965	TBC1D7	1.79892e-10	11.7368	0	protein_coding
NR_046234	WDR92	9.66843e-09	11.7346	0	protein_coding
NM_003981	PRC1	2.57695e-07	11.7306	0.600586	protein_coding
NM_001193636	DHRS4L2	1.32542e-11	11.7298	0	protein_coding
NM_001257137	ITCH	2.46234e-08	11.7111	0	protein_coding
NM_001242936	FAM47E	2.09132e-22	11.7111	0	protein_coding
NR_037719	C17orf61-PLSCR3	3.85305e-08	11.7092	0.679646	nonsense_mediated_decay
NM_001198962	ECHDC2	3.11044e-13	11.707	0	protein_coding
NM_199368	TRPC4AP	1.35654e-07	11.6891	0.599289	protein_coding
NM_032327	ZDHHC16	3.51491e-08	11.6882	0.541287	protein_coding
NM_133376	ITGB1	2.35397e-07	11.6867	0.587623	protein_coding
NM_001128303	LACC1	1.6612e-08	11.6857	0	protein_coding
NM_001202513	MXD1	5.49712e-08	11.6807	0.452287	protein_coding
NM_003227	TFR2	3.05533e-09	11.6758	0	protein_coding
NR_073581	TYSND1	1.08901e-09	11.6754	0	processed_transcript
NM_001126054	CASK	2.79094e-08	11.6746	0	protein_coding
NR_037712	RAD51D	1.73651e-08	11.6725	0	nonsense_mediated_decay
NM_001242916	ZFAND6	1.04109e-08	11.6693	0	protein_coding
NM_172089	TNFSF12-TNFSF13	7.33789e-09	11.6574	0	protein_coding
NM_177952	PPM1A	1.46111e-07	11.6482	0.818299	protein_coding
NM_001242630	GFOD1	2.72046e-09	11.6454	0	protein_coding
NM_001166131	EME1	3.88648e-08	11.6363	0.709075	protein_coding
NR_037583	LEMD1	8.99449e-09	11.6356	0	processed_transcript
NM_001025595	ARFIP1	3.29371e-08	11.6315	0	protein_coding
NM_213662	STAT3	1.11654e-08	11.6295	0	protein_coding
NM_001134663	SAMD13	9.42614e-09	11.6289	0	protein_coding
NR_027882	BAX	5.58732e-16	11.6287	0	protein_coding
NM_183323	PAIP1	2.26215e-09	11.62	0	protein_coding
NM_001008390	CGGBP1	1.21912e-08	11.6174	0	protein_coding
NM_032975	DTNA	5.53609e-15	11.5877	0	protein_coding
NM_001143788	PPHLN1	9.88264e-08	11.5741	0.532614	protein_coding
NM_001165938	STARD3	5.71248e-08	11.5712	0.528855	protein_coding
NR_034151	LOC730227	8.37804e-09	11.5691	0	lncRNA
NM_001012454	FAM71F2	1.26882e-08	11.5689	0	protein_coding
NM_014955	METTL13	5.76375e-09	11.5581	0	protein_coding
NM_001013842	C8orf58	4.29318e-08	11.5537	0.446906	protein_coding
NM_005418	ST5	2.02183e-08	11.5442	0	protein_coding
NM_001010892	RSPH4A	1.20359e-08	11.5344	0	protein_coding
NM_001178086	ZFX	2.36196e-08	11.5273	0	protein_coding
NM_005157	ABL1	2.53194e-08	11.5249	0	protein_coding
NM_001171747	C3orf52	8.6196e-08	11.5236	0.655608	protein_coding
NM_001130069	SUMF2	1.05671e-13	11.5229	0	protein_coding
NM_001261446	TXNRD1	1.40233e-08	11.5198	0	protein_coding
NM_174966	ST3GAL3	4.5022e-21	11.5173	0	protein_coding
NM_006624	ZMYND11	8.0189e-11	11.5075	0	protein_coding
NM_001199629	MYL6B	7.40447e-09	11.5071	0	protein_coding
NM_001193452	NUDT16L1	4.13547e-08	11.5057	0.6088	protein_coding
NM_006569	CGREF1	1.79859e-08	11.4997	0	protein_coding
NR_049764	FBXO28	1.10828e-07	11.4941	0.443878	nonsense_mediated_decay
NM_213619	ATP6V1H	1.00379e-07	11.494	0.889916	protein_coding
NM_001242914	ZFAND6	9.29042e-09	11.4912	0	protein_coding
NM_001204220	ZNF670	1.45669e-07	11.4879	0.608888	protein_coding
NM_001261392	NOL10	2.51119e-07	11.485	1.34679	protein_coding
NM_001199285	PHOSPHO2	1.44064e-07	11.4751	0.537752	protein_coding
NM_001146032	FCHO2	1.56392e-08	11.4689	0	protein_coding
NM_001136530	SERPINE2	1.72531e-08	11.4638	0	protein_coding
NM_181356	SUPT3H	3.19716e-12	11.4606	0	protein_coding
NM_001037537	PHYH	2.25636e-08	11.445	0	protein_coding
NR_046402	POLD1	2.12826e-08	11.4353	0	nonsense_mediated_decay
NM_144673	CMTM2	8.14982e-09	11.435	0	protein_coding
NM_001014448	CPZ	3.57846e-21	11.4348	0	protein_coding
NR_046388	PELP1	1.89188e-09	11.434	0	unannotated_transcripts
NM_183357	ADCY5	5.76473e-10	11.4247	0	protein_coding
NM_016651	DACT1	3.40795e-09	11.4236	0	protein_coding
NM_001018104	FAHD1	1.60989e-08	11.4224	0	protein_coding
NM_001270731	BCL2L13	5.47456e-08	11.4128	0.491605	protein_coding
NR_026787	LMLN	3.44323e-08	11.4101	0	protein_coding
NM_001271748	APEX2	1.26743e-07	11.408	0.408101	protein_coding
NR_037573	DCTN5	1.5193e-08	11.3915	0	protein_coding
NM_020372	SLC22A17	3.1923e-09	11.3882	0	protein_coding
NM_201575	SEZ6L2	7.48065e-08	11.3748	0.671009	protein_coding
NM_001099406	SLC39A6	1.41979e-08	11.3739	0	protein_coding
NM_153026	PRICKLE1	1.8185e-08	11.3709	0	protein_coding
NM_001130060	ATF7	3.38035e-08	11.3604	0	protein_coding
NM_001258373	SPATA20	9.83577e-08	11.3567	0.507729	protein_coding
NM_001260489	LSR	5.15533e-08	11.3559	0.46382	protein_coding
NM_001141979	TP53BP1	1.09136e-07	11.3352	0.637989	protein_coding
NM_001170757	FAM122B	5.56867e-08	11.3341	0.682041	protein_coding
NM_201612	IKBIP	3.00021e-08	11.3301	0	protein_coding
NR_076392	LONP1	2.16111e-07	11.3252	1.45655	protein_coding
NM_016325	ZNF274	1.4294e-08	11.3196	0	protein_coding
NM_001205122	ATG13	7.80375e-08	11.3186	0.68027	protein_coding
NM_024781	CCDC102B	2.99983e-08	11.3148	0	protein_coding
NM_181441	MRPL55	3.40252e-11	11.3087	0	protein_coding
NM_001243280	ALCAM	2.40053e-08	11.2903	0	protein_coding
NM_000793	DIO2	1.81395e-09	11.2896	0	protein_coding
NM_178584	44084	7.62895e-09	11.2888	0	protein_coding
NM_000641	IL11	2.05503e-08	11.2799	0	protein_coding
NR_037653	ST20	1.71327e-07	11.2759	0.673357	protein_coding
NM_001243885	TOB1	1.4213e-07	11.2753	0.361511	protein_coding
NM_014985	CEP152	1.06112e-07	11.2569	0.666553	protein_coding
NM_175624	RAB3IP	2.07904e-07	11.2462	0.975104	protein_coding
NM_001085454	GIT1	3.72833e-08	11.2448	0	protein_coding
NM_018417	ADCY10	4.10671e-09	11.2408	0	protein_coding
NM_001244249	APEX1	2.86788e-08	11.2385	0	protein_coding
NM_175738	RAB37	1.15357e-33	11.2372	0	protein_coding
NR_028464	ATXN3	5.39999e-11	11.2346	0	processed_transcript
NM_001271763	DUS2L	2.78693e-08	11.2229	0	protein_coding
NM_001031714	INF2	4.87773e-08	11.2135	0.542497	protein_coding
NM_001164280	SLC37A4	1.65249e-07	11.2075	0.54333	protein_coding
NM_001178002	ATP8B3	5.22203e-09	11.2046	0	protein_coding
NM_001166346	MDFIC	1.23707e-08	11.2014	0	protein_coding
NM_005055	RAPSN	1.1847e-08	11.1814	0	protein_coding
NM_206937	LIG4	6.54273e-08	11.1789	0.5338	protein_coding
NM_001198619	MAP7	1.55926e-08	11.1775	0	protein_coding
NM_198377	CACNA1G	1.11162e-24	11.1773	0	protein_coding
NM_001135642	INPP5K	1.24179e-08	11.1625	0	protein_coding
NM_001251934	NR1H3	1.32457e-12	11.1589	0	protein_coding
NM_001127667	GSN	8.1683e-10	11.1477	0	protein_coding
NM_001146319	GRAMD3	1.03513e-16	11.1339	0	protein_coding
NR_028458	ATXN3	1.68277e-14	11.11	0	nonsense_mediated_decay
NM_130471	MADD	2.27822e-13	11.1068	0	protein_coding
NM_212472	PRKAR1A	3.00113e-08	11.1026	0	protein_coding
NM_018374	TMEM106B	1.05161e-08	11.1002	0	protein_coding
NM_001271594	SESN3	5.15607e-09	11.0935	0	protein_coding
NR_026697	FAM134C	2.70029e-07	11.0892	1.30496	nonsense_mediated_decay
NM_001166161	PPP1R9A	5.76908e-15	11.0885	0	protein_coding
NM_205768	ZBTB18	1.02908e-08	11.0801	0	protein_coding
NM_018682	MLL5	1.04694e-08	11.0757	0	protein_coding
NR_073367	DNAJC10	7.43094e-09	11.0727	0	protein_coding
NM_001135676	C8orf40	1.42854e-12	11.0656	0	protein_coding
NM_016326	CKLF	5.82535e-20	11.065	0	protein_coding
NM_001244604	DPYSL2	9.2779e-08	11.0645	0.388224	protein_coding
NM_020892	DTX2	2.23897e-08	11.0632	0	protein_coding
NR_038224	ZNF503-AS1	6.10535e-08	11.0485	0.562805	lncRNA
NR_073481	ZNF689	2.92641e-12	11.0431	0	unannotated_transcripts
NM_001251830	SPP1	5.81979e-23	11.0405	0	protein_coding
NM_205833	IGSF1	1.42213e-08	11.0387	0	protein_coding
NM_001135051	FAM160B1	8.15965e-08	11.0271	0.597653	protein_coding
NM_001242361	NRD1	1.41516e-13	11.0217	0	protein_coding
NM_001040110	NRF1	4.40733e-08	11.009	0	protein_coding
NM_001142451	SPNS1	2.12906e-08	11.0076	0	protein_coding
NM_001142464	ECSIT	9.50976e-08	11.0073	0.64695	protein_coding
NM_014910	ZNF507	1.62811e-07	11.0047	1.20135	protein_coding
NM_006746	SCML1	1.2233e-08	11.0024	0	protein_coding
NM_001163259	FAM63A	2.83474e-08	10.9982	0	protein_coding
NM_183233	SLC22A18	5.36998e-09	10.9932	0	protein_coding
NM_152837	SNX16	1.44798e-08	10.9921	0	protein_coding
NM_022910	NDRG4	2.76497e-20	10.9881	0	protein_coding
NM_001251922	RAP1B	1.69111e-13	10.9719	0	protein_coding
NM_138992	BACE2	4.68691e-08	10.9691	0	protein_coding
NM_001270841	CRIP2	6.97259e-09	10.969	0	protein_coding
NM_004945	DNM2	2.6979e-07	10.9663	0.426142	protein_coding
NR_045818	TMCO1	9.72008e-09	10.9597	0	protein_coding
NM_001164605	FXYD5	2.12828e-08	10.9587	0	protein_coding
NM_020910	KIAA1549	1.05622e-07	10.9557	0.588886	protein_coding
NM_001161473	ALDH3B1	5.455e-11	10.9535	0	protein_coding
NM_001206983	METTL23	3.64872e-08	10.9533	0	protein_coding
NM_001243158	TAF1C	2.14758e-11	10.9488	0	protein_coding
NM_138766	PAM	4.51448e-08	10.9369	0	protein_coding
NM_001199238	GPANK1	3.81557e-07	10.9339	1.26801	protein_coding
NM_001195822	HSDL2	2.24818e-07	10.9329	0.679854	protein_coding
NM_001267547	ARFRP1	3.90516e-12	10.9276	0	protein_coding
NM_001161587	GYS1	2.15726e-07	10.9259	0.673255	protein_coding
NM_001171879	MCF2	1.63592e-13	10.908	0	protein_coding
NM_001127364	FAM221A	8.60662e-09	10.9055	0	protein_coding
NM_022367	SEMA4A	9.92322e-10	10.9049	0	protein_coding
NM_001193514	SLC30A6	2.47143e-07	10.9022	1.23062	protein_coding
NM_024101	MLPH	1.619e-08	10.8996	0	protein_coding
NM_007282	RNF13	7.57018e-09	10.8807	0	protein_coding
NM_017737	FNBP1L	6.08722e-09	10.8749	0	protein_coding
NM_001122853	MYOZ3	4.85775e-09	10.8603	0	protein_coding
NM_145738	SYNGR1	4.1968e-08	10.8584	0	protein_coding
NM_001271698	ABCB7	7.03017e-09	10.8571	0	protein_coding
NR_047549	SLC25A12	8.5165e-08	10.8563	0.545536	nonsense_mediated_decay
NM_004816	FAM189A2	5.73283e-09	10.8557	0	protein_coding
NM_014761	IST1	2.14692e-07	10.8507	0.911155	protein_coding
NM_001005408	NEURL4	1.44059e-07	10.8446	1.40066	protein_coding
NM_004258	CD101	5.48003e-08	10.8436	0	protein_coding
NM_033340	CASP7	3.49757e-08	10.8406	0	protein_coding
NM_194325	ZNF30	1.50868e-08	10.8352	0	protein_coding
NM_000481	AMT	3.51482e-09	10.8335	0	protein_coding
NM_198047	HIBCH	1.32185e-07	10.8324	0.601799	protein_coding
NM_002498	NEK3	1.12309e-08	10.8246	0	protein_coding
NM_001167989	PQBP1	3.35569e-08	10.8186	0	protein_coding
NM_001195753	THAP3	3.65458e-08	10.8181	0	protein_coding
NM_153372	C1QTNF1	1.2193e-13	10.814	0	protein_coding
NM_009587	LGALS9	3.97351e-12	10.8127	0	protein_coding
NM_152409	C5orf24	2.07749e-07	10.8087	0.613501	protein_coding
NM_001256295	ETS2	7.03326e-09	10.8006	0	protein_coding
NM_001164385	STAU2	8.68623e-08	10.7946	0.607743	protein_coding
NM_173073	SLC35C2	4.24061e-08	10.7752	0	protein_coding
NM_052828	TRIM10	2.73561e-08	10.7737	0	protein_coding
NM_020918	GPAM	2.67817e-08	10.7581	0	protein_coding
NM_001164782	ATXN3	4.74642e-29	10.7395	0	unannotated_transcripts
NM_001160175	NAT1	2.8786e-12	10.7347	0	protein_coding
NM_001271851	RRAGC	5.2706e-08	10.725	0	protein_coding
NM_001271609	STX10	1.74346e-07	10.7213	0.504386	protein_coding
NM_020183	ARNTL2	9.07898e-11	10.7099	0	protein_coding
NM_001135208	FKBP2	3.00204e-07	10.7077	0.538501	protein_coding
NM_001271928	KIF27	1.53796e-07	10.7052	0.671926	protein_coding
NM_015847	MBD1	4.47867e-19	10.7009	0	protein_coding
NM_000106	CYP2D6	1.81406e-08	10.7005	0	protein_coding
NM_145054	WDR16	4.28796e-09	10.6988	0	protein_coding
NM_001243657	NUDT7	9.97902e-09	10.6975	0	protein_coding
NM_017602	OTUD5	6.31832e-08	10.6934	0	protein_coding
NM_001199779	PSMB2	1.4636e-08	10.6886	0	protein_coding
NM_015726	DCAF8	2.06477e-08	10.6865	0	protein_coding
NM_030922	NIPA2	2.70294e-08	10.6809	0	protein_coding
NR_024022	SETMAR	1.62955e-07	10.6776	0.898769	unannotated_transcripts
NR_038370	NDRG3	1.7783e-07	10.6748	0.371611	protein_coding
NM_001166010	ECI2	9.4118e-09	10.6624	0	protein_coding
NR_046083	ADIPOR1	1.81473e-07	10.6517	0.545689	unannotated_transcripts
NM_001199649	PTK2	4.46393e-08	10.6441	0	protein_coding
NR_048557	TSN	1.35578e-08	10.6272	0	unannotated_transcripts
NM_001195677	VAPB	1.86362e-07	10.6227	0.608447	protein_coding
NM_001103161	SH2D5	5.79718e-08	10.6224	0	protein_coding
NM_145654	RDM1	1.00943e-08	10.6211	0	protein_coding
NM_001005417	B4GALT2	2.38502e-07	10.6163	0.605111	protein_coding
NM_001242906	ASCC2	4.03651e-08	10.6156	0	protein_coding
NM_001009923	TMEM230	7.20876e-09	10.6105	0	protein_coding
NR_038193	METTL23	8.12205e-08	10.5951	0.493022	protein_coding
NR_037904	UBE2F-SCLY	1.01724e-08	10.5913	0	nonsense_mediated_decay
NM_001270892	TRAPPC6A	3.20275e-09	10.5894	0	protein_coding
NM_014721	PHACTR2	1.70168e-09	10.5794	0	protein_coding
NM_001193570	CSRP1	6.59651e-08	10.5715	0	protein_coding
NM_012324	MAPK8IP2	2.16715e-08	10.5587	0	protein_coding
NM_001267038	CENPK	5.01418e-08	10.5562	0	protein_coding
NM_001270679	MCU	6.53184e-12	10.5532	0	protein_coding
NM_001018160	NAE1	1.00281e-07	10.5467	0.645603	protein_coding
NR_045670	PSMC3IP	4.3543e-08	10.5463	0	protein_coding
NM_001164774	ATXN3	8.91601e-26	10.5327	0	unannotated_transcripts
NM_001161616	RGL3	1.97958e-08	10.5289	0	protein_coding
NM_001198528	TCF7L2	3.25023e-16	10.5191	0	protein_coding
NM_001136267	DAZAP2	4.26706e-10	10.5144	0	protein_coding
NM_001521	GTF3C2	6.83384e-08	10.5114	0	protein_coding
NM_001083907	BANK1	2.35364e-08	10.51	0	protein_coding
NR_073598	ATP8B4	1.65815e-14	10.5083	0	nonsense_mediated_decay
NM_001253826	GALNT14	5.9904e-10	10.508	0	protein_coding
NM_178135	HSD17B13	5.34151e-08	10.5032	0	protein_coding
NM_015476	TPGS2	2.30033e-07	10.4958	0.9897	protein_coding
NM_001145144	SLC1A5	1.92208e-08	10.4895	0	protein_coding
NR_046350	PPWD1	3.154e-08	10.4881	0	unannotated_transcripts
NR_049772	PSME3	2.28876e-07	10.4846	0.602755	protein_coding
NM_001076678	ZNF493	6.56489e-08	10.4799	0	protein_coding
NM_001258464	PAX6	1.08723e-09	10.4767	0	protein_coding
NM_001037808	EIF3C	2.48189e-11	10.4758	0	protein_coding
NM_001251935	NR1H3	1.34506e-13	10.4664	0	protein_coding
NM_001193316	VIPAS39	2.51548e-11	10.4653	0	protein_coding
NM_145637	APOL2	2.01333e-08	10.4643	0	protein_coding
NR_026542	C21orf88	1.37368e-08	10.4452	0	lncRNA
NM_078471	MYO18A	3.59838e-08	10.4422	0	protein_coding
NM_001199917	PGM3	1.31197e-08	10.4302	0	protein_coding
NM_001251917	RAP1B	3.31831e-11	10.4294	0	protein_coding
NM_001252036	RAB5B	1.77572e-07	10.4275	0.659259	protein_coding
NM_015610	WIPI2	4.38873e-09	10.4272	0	protein_coding
NM_001142805	SLC6A8	1.37665e-07	10.4224	0.902743	protein_coding
NM_001256681	KIAA0391	2.63013e-07	10.4206	0.433209	protein_coding
NM_001202489	UBE2G2	2.27526e-07	10.4167	1.4437	protein_coding
NM_032173	ZNRF3	2.84408e-07	10.4004	1.04769	protein_coding
NM_001114331	CLCN7	6.83792e-08	10.389	0	protein_coding
NM_001178055	PARP8	1.78985e-08	10.3885	0	protein_coding
NM_001054	SULT1A2	1.2808e-08	10.3875	0	protein_coding
NR_039995	TMEM161B-AS1	1.88112e-08	10.3846	0	lncRNA
NR_024405	LOC730101	3.14558e-08	10.3816	0	processed_transcript
NM_152927	CPNE1	1.30149e-44	10.3737	0	protein_coding
NR_047580	TKT	3.29038e-08	10.3706	0	nonsense_mediated_decay
NM_001123226	MTO1	1.55517e-08	10.3647	0	protein_coding
NM_002685	EXOSC10	6.82963e-08	10.3643	0	protein_coding
NM_203315	BDH1	8.13621e-08	10.363	0.591082	protein_coding
NM_002226	JAG2	1.23929e-07	10.3623	1.41908	protein_coding
NM_001097640	FUT3	2.54409e-08	10.3547	0	protein_coding
NM_152526	PARD3B	1.68184e-08	10.3538	0	protein_coding
NM_007182	RASSF1	3.31428e-08	10.3536	0	protein_coding
NM_001421	ELF4	1.70106e-07	10.3523	0.671926	protein_coding
NM_001165966	PITPNM3	3.65578e-08	10.3472	0	protein_coding
NM_001044388	ZNF557	1.44039e-07	10.3449	1.03222	protein_coding
NM_001177388	LGALS3	8.32269e-08	10.3331	0.36271	unannotated_transcripts
NM_001077497_6	PRR3	1.02184e-06	10.315	0.832092	unannotated_transcripts
NM_006994	BTN3A3	7.01631e-08	10.312	0	protein_coding
NM_001195433	MLF1	1.08124e-29	10.3112	0	protein_coding
NR_024516	APLP2	5.68989e-09	10.3066	0	nonsense_mediated_decay
NM_025249	KIAA1683	1.79956e-07	10.3066	0.369776	protein_coding
NM_012398	PIP5K1C	9.37594e-08	10.3057	0.548444	protein_coding
NM_002344	LTK	2.00777e-08	10.3041	0	protein_coding
NM_024845	NAA60	8.64491e-08	10.2962	0.664943	protein_coding
NR_024527	SCN4B	1.99216e-08	10.2936	0	retained_intron
NM_032546	TRIM54	2.04985e-08	10.2932	0	protein_coding
NM_001177612	CINP	4.80628e-08	10.2833	0	unannotated_transcripts
NM_001099681	MAGIX	2.87207e-10	10.2805	0	protein_coding
NM_001199770	OTX1	1.55096e-07	10.2799	0.377941	protein_coding
NM_001242638	IL31RA	1.06437e-12	10.2754	0	protein_coding
NM_001199786	FKBP1A	8.36153e-07	10.2749	0.440393	protein_coding
NM_013981	NRG2	1.49993e-08	10.2726	0	protein_coding
NM_001164777	ATXN3	4.89095e-32	10.271	0	unannotated_transcripts
NM_212533	ABCA2	1.51809e-07	10.2674	0.606513	protein_coding
NR_073398	SEMA4F	1.3047e-08	10.258	0	nonsense_mediated_decay
NM_020748	INTS2	8.70918e-08	10.258	0.696156	protein_coding
NM_001242828	ELOVL5	2.08944e-08	10.2575	0	protein_coding
NM_001190880	HYI	5.51252e-08	10.2508	0	protein_coding
NM_001003396	TPD52L1	6.13136e-08	10.246	0	protein_coding
NM_001165258	TMEM14C	8.07638e-09	10.2459	0	protein_coding
NM_024740	ALG9	5.56158e-08	10.2446	0	protein_coding
NM_005922	MAP3K4	5.49828e-08	10.2397	0	protein_coding
NM_001003652	SMAD2	5.19106e-08	10.2387	0	protein_coding
NM_001142318	TXNL4B	1.65354e-08	10.2382	0	protein_coding
NM_178445	CCRL1	7.11359e-09	10.237	0	protein_coding
NR_048538	SLC9A8	9.87115e-13	10.2333	0	protein_coding
NM_001257240	ALG13	1.75806e-07	10.2249	0.492684	protein_coding
NM_024615	PARP8	1.00148e-07	10.2212	0.67213	protein_coding
NM_018676	THSD1	3.3971e-08	10.2191	0	protein_coding
NM_182899	CREB5	7.33525e-09	10.2126	0	protein_coding
NM_000930	PLAT	2.01332e-08	10.2037	0	protein_coding
NM_030587	B4GALT2	1.97454e-07	10.2035	0.546452	protein_coding
NM_001315	MAPK14	8.865e-08	10.2031	0	protein_coding
NM_001178064	NSMF	7.57867e-08	10.1976	0	protein_coding
NM_001079881	PRKD2	1.07416e-08	10.1973	0	protein_coding
NM_001243116	NFKBIB	5.83504e-08	10.1927	0	protein_coding
NM_001242834	NDRG4	2.92171e-08	10.1746	0	protein_coding
NM_014767	SPOCK2	2.13026e-08	10.1723	0	protein_coding
NM_153253	SIPA1	5.15762e-08	10.1671	0	protein_coding
NM_199247	CACNB1	1.07099e-08	10.1545	0	protein_coding
NR_051988	FBXW10	3.76775e-09	10.1535	0	nonsense_mediated_decay
NM_001126240	TP73	9.86954e-09	10.1487	0	protein_coding
NM_001256120	NAA10	3.29827e-07	10.1481	0.460359	protein_coding
NM_001252669	GULP1	2.52258e-07	10.1428	1.40012	protein_coding
NM_001172775	ZNF555	2.28044e-08	10.1418	0	protein_coding
NM_138626	BCL2L11	4.83124e-07	10.1323	0.63367	protein_coding
NM_001184999	KIAA0430	1.88305e-07	10.1284	0.395558	protein_coding
[truncated: 26,743 more rows]

## Sheet: Figure 2 - Source data 1B
Accession	Gene	normalized FPKM (no TRAIL)	log2(fold change)	-log10p	RefSeq Annotation
NR_033712	TP73-AS1	1.01786e-279	907.863	0	processed_transcript
NR_040056	IQCH-AS1	3.00752e-273	892.088	0	unannotated_transcripts
NR_024510_1	LINC00623	2.86162e-288	726.203	0	unannotated_transcripts
NM_001171933	CDH23	1.82381e-206	657.808	0	protein_coding
NM_001171934	CDH23	1.36854e-203	656.523	0	protein_coding
NM_001076682	NCAM1	8.10129e-207	652.472	0	protein_coding
NM_001242608	NCAM1	8.25263e-202	638.072	0	protein_coding
NM_001437	ESR2	2.59475e-189	610.51	0	protein_coding
NR_024133	GHRL	8.17657e-213	574.221	0	unannotated_transcripts
NR_024134	GHRL	1.11738e-178	572.764	0	unannotated_transcripts
NR_024138	GHRL	3.9719e-178	572.744	0	unannotated_transcripts
NR_045023	C17orf76-AS1	4.35319e-170	547.831	0	lncRNA
NM_001214902	ESR2	3.40097e-150	478.814	0	protein_coding
NM_001242491_1	FAM156A	1.83309e-133	424.241	0	unannotated_transcripts
NM_001040275	ESR2	4.27237e-152	422.448	0	protein_coding
NM_001164283	TRAF3IP2	6.08832e-127	401.574	0	protein_coding
NR_045408	RCAN3AS	8.85842e-172	393.953	0	lncRNA
NM_001242761	DLGAP1	3.2307e-107	335.851	0	protein_coding
NM_023946	LYNX1	4.29809e-119	334.355	0	protein_coding
NM_001271876	ESR2	1.31741e-171	308.384	0	protein_coding
NM_001214903	ESR2	1.16178e-164	307.991	0	unannotated_transcripts
NM_001271877	ESR2	1.64295e-161	307.837	0	protein_coding
NM_001258403	SLC4A8	1.84332e-94	296.068	0	protein_coding
NM_001195252	APTX	1.91116e-83	259.191	0	protein_coding
NM_001170793	RMDN2	2.92383e-82	254.229	0	protein_coding
NM_001206482	ELMO1	3.40035e-80	244.62	0	protein_coding
NR_045407	RCAN3AS	1.39512e-107	238.384	0	lncRNA
NM_001033087	MACROD2	2.65712e-128	229.386	0	protein_coding
NM_018905	PCDHA2	3.69534e-122	229.137	0	protein_coding
NM_018906	PCDHA3	4.70759e-119	223.384	0	protein_coding
NM_001270408	JAM2	5.46776e-72	220.294	0	protein_coding
NM_001276251	LDLRAD4	5.34354e-71	215.858	0	protein_coding
NR_026700	GLYCTK	1.00966e-69	215.842	0	protein_coding
NR_045025	C17orf76-AS1	3.92094e-69	214.27	0	lncRNA
NR_046318	ENC1	8.41462e-67	203.141	0	unannotated_transcripts
NR_040049	SDCBP2-AS1	6.26345e-78	202.807	0	lncRNA
NM_001163265	PCYT1B	2.57542e-66	199.652	0	protein_coding
NM_001272108	PAQR6	6.60155e-64	194.806	0	protein_coding
NM_001244963	NAV2	1.32198e-62	191.302	0	protein_coding
NM_001267565	CREM	1.18307e-62	190.875	0	processed_transcript
NM_170726	ALDH4A1	2.5934e-85	185.514	0	protein_coding
NM_001130160	STOX1	8.87889e-102	182.228	0	protein_coding
NR_026702	GLYCTK	1.18986e-102	181.386	0	protein_coding
NM_001114982	TP63	1.76855e-58	173.208	0	protein_coding
NM_001220473	PPFIA2	5.33396e-62	172.997	0	protein_coding
NM_001220474	PPFIA2	1.31212e-60	171.507	0	protein_coding
NM_003625	PPFIA2	1.31212e-60	171.507	0	protein_coding
NM_001197128	IRF3	1.97481e-59	170.74	0	protein_coding
NM_001271162	PGR	4.49972e-58	170.113	0	protein_coding
NM_001220476	PPFIA2	1.88296e-58	169.209	0	protein_coding
NM_001195254	APTX	7.91359e-65	167.909	0	protein_coding
NM_001220475	PPFIA2	4.98374e-57	167.695	0	protein_coding
NM_201590	CACNB2	1.75502e-56	167.592	0	protein_coding
NM_181269	CMTM1	4.6064e-85	167.251	0	protein_coding
NM_001034955	SORBS1	2.23343e-55	165.244	0	protein_coding
NM_001220477	PPFIA2	1.11504e-56	157.017	0	protein_coding
NM_004746	DLGAP1	1.32233e-53	156.351	0	protein_coding
NM_001220478	PPFIA2	2.68972e-56	156.287	0	protein_coding
NM_152606	ZNF540	1.53704e-55	154.289	0	protein_coding
NM_001193289	APOBEC3A_B	1.83878e-94	152.668	0	protein_coding
NM_181270	CMTM1	1.49462e-90	152.538	0	protein_coding
NM_181709	FAM101A	5.31712e-52	152.441	0	protein_coding
NM_001272113	PAQR6	4.23012e-51	151.933	0	protein_coding
NM_001127441	CPA5	1.85429e-55	151.139	0	protein_coding
NM_001204871	URGCP-MRPS24	6.24511e-72	147.281	0	protein_coding
NM_001002812	PDE4DIP	5.91144e-92	146.256	0	protein_coding
NM_001270462	ST3GAL3	9.52021e-60	146.064	0	protein_coding
NM_030984	TBXAS1	2.01125e-49	145.183	0	protein_coding
NM_001197296	ECM2	9.78956e-49	142.7	0	protein_coding
NR_038265	PPFIA2	3.77449e-49	142.64	0	unannotated_transcripts
NM_170782	KCNN3	3.01756e-52	142.471	0	protein_coding
NM_152897	SNX21	1.04913e-47	141.944	0	protein_coding
NR_037802	ZNF625-ZNF20	2.67689e-54	141.714	0	nonsense_mediated_decay
NM_001130159	STOX1	5.65827e-98	139.901	0	protein_coding
NM_001272105	PAQR6	1.60602e-46	139.071	0	protein_coding
NM_001199663	PMF1-BGLAP	6.25986e-67	137.194	0	protein_coding
NM_138981	MAPK10	3.73911e-70	137.11	0	unannotated_transcripts
NM_001145307	LRTOMT	4.83527e-51	134.889	0	protein_coding
NM_001206542	CASP10	1.42775e-45	133.004	0	protein_coding
NM_001146113	MIER1	8.73446e-54	131.19	0	protein_coding
NR_027646	ATP1A1OS	9.03369e-44	129.307	0	lncRNA
NM_139003	HFE	1.52487e-43	128.744	0	protein_coding
NM_001258295	NFATC2	1.28645e-64	126.893	0	protein_coding
NM_032974	CASP10	2.18559e-43	126.469	0	protein_coding
NM_001204151	MBD1	9.48937e-63	124.283	0	protein_coding
NM_001142282	RPS24	8.59019e-134	124.278	0	protein_coding
NM_001001851	ITIH5	4.82714e-45	123.616	0	protein_coding
NR_073058	C7orf55	7.6177e-67	121.107	0	unannotated_transcripts
NM_181272	CMTM1	3.41321e-49	120.426	0	protein_coding
NM_001258294	NFATC2	2.20163e-62	118.044	0	protein_coding
NM_001202546	CUX1	1.77458e-40	117.336	0	protein_coding
NM_013290	PSMC3IP	7.33118e-49	115.504	0	protein_coding
NM_002753	MAPK10	7.09085e-78	114.58	0	protein_coding
NR_075090	SOX2-OT	4.48629e-40	113.077	0	lncRNA
NM_001143919	LTB4R	1.36716e-44	112.567	0	protein_coding
NR_075093	SOX2-OT	1.57413e-39	111.681	0	lncRNA
NM_001198688	LEPR	1.61427e-72	111.026	0	protein_coding
NM_001271069	MAX	9.36236e-85	110.618	0	protein_coding
NM_139004	HFE	1.2715e-42	109.175	0	protein_coding
NM_001131010	SATB1	3.0204e-38	107.459	0	protein_coding
NM_001163120	RDM1	1.82472e-41	106.359	0	protein_coding
NM_001260496	RDX	1.36707e-56	106.07	0	protein_coding
NM_001267566	CREM	1.63737e-42	106.066	0	unannotated_transcripts
NM_197957	MAX	1.16255e-85	103.914	0	protein_coding
NM_001257334	ATP5A1	7.13196e-36	103.218	0	protein_coding
NM_001167987	INCA1	7.11205e-35	99.6032	0	protein_coding
NM_001040138	CKLF	4.42353e-34	99.389	0.601886	protein_coding
NM_019101	APOM	7.53612e-35	98.6919	0	protein_coding
NM_001164556	DISC1	5.01009e-35	98.453	0	protein_coding
NM_022877_1	SMN2	3.21761e-254	97.9567	0	unannotated_transcripts
NR_047680	BLNK	6.64128e-41	97.7102	0	protein_coding
NR_046112	LOC440894	2.84708e-119	95.7442	0	unannotated_transcripts
NM_001003927	EVI2A	9.72579e-40	95.7062	0	protein_coding
NR_040242	MPPE1	3.22968e-33	94.0893	0	nonsense_mediated_decay
NM_001015878	AURKC	4.6942e-33	93.5342	0	protein_coding
NM_001077490	GNAS	2.67201e-34	93.4662	0	protein_coding
NR_047681	BLNK	1.24369e-38	93.1693	0	protein_coding
NM_001272111	PAQR6	2.22072e-33	92.922	0	protein_coding
NR_047682	BLNK	2.07903e-38	92.7232	0	protein_coding
NM_001114980	TP63	1.59887e-35	91.9654	0	protein_coding
NM_001010896	C10orf113	5.89343e-32	91.4777	0.43735	unannotated_transcripts
NM_001199287	PHOSPHO2	9.68703e-32	90.734	0.438839	protein_coding
NM_001114981	TP63	9.89261e-33	90.1311	0	protein_coding
NM_172388	NFATC1	1.16798e-32	89.9859	0	protein_coding
NM_001256283	EDNRA	1.19812e-32	89.9163	0	unannotated_transcripts
NM_001242814	ANKRD6	3.54821e-32	88.7597	0	protein_coding
NR_045929	PGAP2	1.20364e-31	88.7237	0	protein_coding
NM_001270897	TRAPPC3	6.06381e-38	87.8983	0	protein_coding
NR_073017	ST3GAL3	7.45033e-45	87.2817	0	protein_coding
NM_001197127	IRF3	1.02493e-30	86.6865	0	protein_coding
NM_001199092	TDRD5	3.61995e-31	85.8205	0	protein_coding
NM_001144913	FGFR2	1.19828e-34	85.1843	0	protein_coding
NM_001258245	TMEM218	1.44696e-33	85.1758	0	protein_coding
NM_001170783	FAM122C	1.00106e-39	84.2894	0	protein_coding
NR_045925	PGAP2	1.26068e-39	83.3555	0	nonsense_mediated_decay
NM_001166253	TBXAS1	8.75484e-37	82.603	0	protein_coding
NM_032539	SLITRK2	5.21795e-40	82.2283	0	protein_coding
NR_049786	SNX17	1.7959e-29	81.9261	0	nonsense_mediated_decay
NM_001256312	STK3	6.93138e-39	81.7781	0	protein_coding
NM_001242637	IL31RA	2.95695e-29	79.9653	0	protein_coding
NM_001258297	NFATC2	1.39979e-41	79.5056	0	protein_coding
NM_033492	CDK11B	4.48124e-29	79.0322	0	unannotated_transcripts
NM_001061	TBXAS1	4.80765e-35	78.7827	0	protein_coding
NM_001242417	WDR20	4.31363e-28	77.0643	0	protein_coding
NR_029394	TBXAS1	2.02127e-35	76.5947	0	unannotated_transcripts
NR_073497	ESR2	4.68338e-169	76.5415	0	processed_transcript
NR_037661	FKBP1A-SDCBP2	1.75762e-28	76.4113	0	protein_coding
NM_001034956	SORBS1	5.36193e-60	75.5742	0	protein_coding
NM_001258240	TMEM218	5.24461e-31	75.372	0	protein_coding
NM_016724	FOLR1	2.20991e-37	74.8066	0	protein_coding
NM_003787	NOL4	1.63589e-34	74.7469	0	protein_coding
NR_038354	WDR20	2.38851e-27	74.5869	0	nonsense_mediated_decay
NM_001272110	PAQR6	2.61182e-30	74.1674	0	protein_coding
NM_001256679	KIAA0391	4.43651e-42	73.8492	0	protein_coding
NR_046450	LOC374443	4.38421e-34	73.7588	0	lncRNA
NM_001137606	PARVG	8.07786e-36	73.4525	0	unannotated_transcripts
NM_001001579	PDE9A	1.04213e-29	73.3268	0	protein_coding
NM_001258241	TMEM218	7.94334e-27	73.1001	0	protein_coding
NM_001258292	NFATC2	6.54541e-37	72.4302	0	protein_coding
NR_073019	ST3GAL3	8.14105e-41	72.0033	0	nonsense_mediated_decay
NM_001258296	NFATC2	8.68349e-40	71.8713	0	protein_coding
NR_047542	CDKN2B-AS1	1.32004e-26	71.6586	0	lncRNA
NR_073046	DEDD2	2.87228e-26	71.0905	0	processed_transcript
NR_046451	LOC374443	4.71258e-26	70.7584	0	unannotated_transcripts
NM_172088	TNFSF13	3.09813e-33	70.7218	0	protein_coding
NM_001160115	C15orf40	5.85719e-26	70.7072	0	protein_coding
NM_001165970	STRADA	4.64019e-32	70.6863	0	protein_coding
NM_199203	TMEM189-UBE2V1	1.21952e-26	70.3579	0	protein_coding
NM_001198938	DTNA	2.73681e-41	70.2776	0	protein_coding
NM_181283	CMTM1	9.08787e-44	70.1604	0	protein_coding
NM_001242638	IL31RA	1.35666e-26	70.0878	0	protein_coding
NR_045021	C17orf76-AS1	5.52033e-98	69.9262	0	lncRNA
NM_001276273	MBD4	8.43162e-50	69.6654	0	protein_coding
NM_001204289	MUC1	1.00458e-26	69.2358	0	protein_coding
NM_001258442	BLNK	1.1034e-26	69.2092	0	protein_coding
NM_001202467	ZMYND11	1.51398e-38	68.8513	0	protein_coding
NR_046445	LOC374443	2.3479e-39	68.7392	0	processed_transcript
NR_024501	FMR1-AS1	1.59788e-33	68.4682	0	lncRNA
NM_001167595	AMACR	1.37334e-25	68.3274	0	protein_coding
NR_045926	PGAP2	1.0573e-24	67.3064	0.307726	nonsense_mediated_decay
NR_027998	RDM1	1.56451e-29	66.8611	0	nonsense_mediated_decay
NM_001137605	PARVG	4.88782e-26	66.8388	0	protein_coding
NR_046446	LOC374443	4.20917e-37	66.6226	0	processed_transcript
NM_001270451	UBE3B	3.23588e-25	66.4496	0	protein_coding
NM_001256236	PGAP2	1.7193e-30	66.1827	0	protein_coding
NM_001244585	LUC7L2	9.2087e-25	65.9272	0	protein_coding
NM_001001576	PDE9A	1.5982e-34	65.6738	0	protein_coding
NM_012237	SIRT2	6.54204e-25	65.6052	0	protein_coding
NM_001136021	NFATC2	2.6746e-35	65.4416	0	protein_coding
NM_182772	CREM	4.82506e-46	65.1692	0	protein_coding
NR_002582	SNORA7A	1.3595e-36	65.1611	0	snoRNA
NM_001256334	CACNA1G	1.66223e-42	65.1378	0	protein_coding
NM_172197	AGER	2.64266e-35	64.9101	0	protein_coding
NM_001201548	SLC16A4	9.07289e-25	64.8176	0	protein_coding
NM_152880	PTK7	8.75319e-25	64.7426	0	protein_coding
NM_001198546	NOL4	2.53765e-30	64.4949	0	protein_coding
NR_073542	MOK	5.10644e-24	63.9291	0	protein_coding
NM_001136570	FAM47E	7.91197e-25	63.8354	0	protein_coding
NR_047616	UTY	8.45783e-25	63.6918	0	protein_coding
NR_046447	LOC374443	1.14771e-29	63.5909	0	processed_transcript
NM_057164	COL6A3	2.44039e-29	63.1305	0	protein_coding
NM_001204291	MUC1	1.9237e-27	62.638	0	protein_coding
NM_001204963	PBX1	3.8669e-30	62.3327	0	protein_coding
NM_001204292	MUC1	5.26586e-27	62.2112	0	protein_coding
NM_001163124	RDM1	1.04422e-28	61.9311	0	protein_coding
NM_001143990	WRAP53	5.59162e-24	61.6091	0	protein_coding
NR_047540	CDKN2B-AS1	8.07096e-38	61.605	0	lncRNA
NR_047603	UTY	6.59069e-24	61.4999	0	protein_coding
NR_024502	FMR1-AS1	6.33656e-27	61.0743	0	lncRNA
NM_001201546	SLC16A4	5.35949e-27	60.4729	0	protein_coding
NM_001143770	ZNF438	5.22887e-23	60.3236	0	protein_coding
NM_017451	BAIAP2	3.58116e-23	60.0125	0	protein_coding
NM_001135109	RIC3	3.11276e-24	59.9012	0	protein_coding
NM_001202544	CUX1	3.29381e-23	59.8889	0	protein_coding
NR_045658	CREB3L4	2.67015e-22	58.9751	0	protein_coding
NM_001204098	CKLF-CMTM1	1.34592e-89	58.6553	0	protein_coding
NM_018900	PCDHA1	1.86206e-26	58.6165	0	protein_coding
NM_001198548	NOL4	1.00324e-27	58.1402	0	protein_coding
NM_001198617	MAP7	2.00884e-37	58.1047	0	protein_coding
NR_073541	MOK	8.56561e-26	57.5724	0	protein_coding
NR_073150	RAP2C	6.63456e-37	57.2984	0	protein_coding
NR_045923	PGAP2	2.65738e-22	57.2308	0	protein_coding
NM_001130482	VRK2	4.97671e-22	57.1062	0	protein_coding
NM_033244	PML	1.16755e-28	57.0858	0	protein_coding
NR_073023	ST3GAL3	6.95717e-22	56.6976	0	nonsense_mediated_decay
NM_001271187	RAP2C	1.47721e-30	56.697	0	protein_coding
NM_001267870	HSD11B1L	1.12263e-21	56.3514	0	protein_coding
NM_001270370	TMEM254	4.94487e-22	56.2966	0	protein_coding
NM_198385	CACNA1G	6.80507e-22	55.4103	0	protein_coding
NR_047541	CDKN2B-AS1	4.48709e-30	55.2837	0	lncRNA
NM_001001569	PDE9A	9.75567e-22	55.0554	0	protein_coding
NM_001258457	TBC1D7	1.73823e-21	54.8994	0	protein_coding
NM_174963	ST3GAL3	6.38721e-28	54.7581	0	protein_coding
NM_001276264	DUOXA1	1.13806e-21	54.2042	0	protein_coding
NM_001171798	TRIQK	3.65447e-26	54.1566	0	protein_coding
NM_001100425	KIAA0895	2.54785e-30	54.13	0	protein_coding
NM_001256277	RAB34	3.40694e-22	54.0938	0	protein_coding
NM_001190720	IKBKB	7.52288e-21	53.7314	0	protein_coding
NM_001167985	INCA1	1.30219e-33	53.6559	0	protein_coding
NM_172374	IL4I1	1.33252e-21	53.5915	0	protein_coding
NM_198377	CACNA1G	5.43303e-32	53.5253	0	protein_coding
NM_016725	FOLR1	1.09577e-29	53.3938	0	protein_coding
NM_001145055	IL18BP	5.52503e-21	53.3654	0	protein_coding
NM_145791	MGST1	8.05272e-21	53.2802	0	protein_coding
NM_152943	ZNF268	6.88878e-21	53.0206	0	protein_coding
NM_001177638	DAG1	2.6872e-21	52.9179	0	protein_coding
NM_001243014	ABCB9	5.31628e-21	52.7938	0	protein_coding
NR_027999	RDM1	1.69263e-20	52.5747	0	nonsense_mediated_decay
NM_145863	ASB3	6.62161e-21	52.2393	0	protein_coding
NR_046282	ZNF74	8.71965e-21	52.141	0	nonsense_mediated_decay
NM_001161657	MYB	6.66734e-32	51.9179	0	protein_coding
NM_001003677	C11orf49	1.94696e-20	51.748	0	protein_coding
NM_207296	MBNL1	3.35452e-20	51.644	0	protein_coding
NM_001204145	HDAC9	1.42135e-20	51.5391	0	protein_coding
NM_001199254	SGOL1	1.37887e-20	51.4383	0	protein_coding
NM_001261820	TCP11	1.61439e-38	51.1536	0	protein_coding
NM_001253791	LOC440335	2.76049e-27	50.7882	0	protein_coding
NM_018896	CACNA1G	1.18612e-25	50.7454	0	protein_coding
NM_001256825	ZNF195	1.62538e-19	50.6018	0.602581	protein_coding
NR_047577	IL4I1	7.39604e-23	50.5735	0	nonsense_mediated_decay
NM_001270373	TMEM254	4.54302e-20	50.5471	0	protein_coding
NM_001145136	CPT1B	1.41473e-20	50.4976	0	unannotated_transcripts
NM_001127663	GSN	2.57454e-20	50.3477	0	protein_coding
NM_174971	ST3GAL3	5.4244e-20	50.3232	0	protein_coding
NM_001257399	UBE2V1	7.0935e-20	50.0534	0	protein_coding
NM_001003792	RBMS3	3.58849e-21	49.7585	0	protein_coding
NM_001174082	NLRP2	7.08117e-20	49.7441	0	protein_coding
NM_198380	CACNA1G	1.16391e-25	49.7193	0	protein_coding
NM_201629	TJP2	2.3458e-39	49.625	0	protein_coding
NM_001205206	SLC19A1	1.90668e-19	49.3919	0	protein_coding
NR_048547	MGST1	5.83421e-28	49.3892	0	protein_coding
NM_022141	PARVG	2.01891e-20	49.1812	0	protein_coding
NM_001261821	TCP11	2.90308e-37	49.1439	0	protein_coding
NM_001142429	MORF4L2	1.90334e-19	49.0583	0	protein_coding
NM_001001584	PDE9A	1.14677e-37	49.0545	0	protein_coding
NM_001204099	CKLF-CMTM1	2.8771e-44	49.0287	0	protein_coding
NM_001256324	CACNA1G	1.26199e-24	48.9866	0	protein_coding
NM_001193277	MID1	1.66301e-20	48.8899	0	protein_coding
NM_001258018	IL4I1	1.13645e-23	48.6145	0	protein_coding
NR_046112_1	LOC440894	2.17963e-97	48.5993	0	unannotated_transcripts
NM_004194	ADAM22	1.77553e-21	47.9889	0	protein_coding
NM_001256304	DTNB	5.25459e-20	47.5493	0	protein_coding
NM_001160179	NAT1	1.18112e-33	47.4949	0	protein_coding
NM_001272112	PAQR6	3.68829e-20	47.3645	0	protein_coding
NM_001193657	C17orf62	2.75365e-25	47.234	0	protein_coding
NR_047599	UTY	6.83726e-20	46.9541	0	protein_coding
NM_001204294	MUC1	5.53387e-20	46.9538	0	protein_coding
NM_134261	RORA	2.21723e-22	46.9112	0	protein_coding
NM_013962	NRG1	1.11385e-31	46.8929	0	protein_coding
NM_001243428	ERG	6.36396e-26	46.801	0	protein_coding
NM_001256326	CACNA1G	8.365e-21	46.7979	0	protein_coding
NM_001142420	MORF4L2	2.33137e-18	46.6682	0.471148	protein_coding
NR_047533	CDKN2B-AS1	2.00719e-19	46.5462	0	lncRNA
NM_173843	IL1RN	3.46107e-26	46.3637	0	protein_coding
NM_198376	CACNA1G	9.01757e-33	46.1934	0	protein_coding
NM_152369	SLC44A3	7.36627e-24	45.8765	0	protein_coding
NR_033711	TP73-AS1	3.66137e-53	45.7501	0	processed_transcript
NM_001142432	MORF4L2	1.4692e-26	45.6147	0	protein_coding
NM_001194947	EIF4G1	3.21192e-18	44.7667	0	protein_coding
NM_002542	OGG1	3.33493e-26	44.6587	0	protein_coding
NM_001195684	TGFBR3	2.79921e-27	44.6337	0	protein_coding
NM_001242614	CD99L2	1.09227e-20	44.6064	0	protein_coding
NM_001174119	ZFYVE27	2.49206e-17	44.5419	0.630042	protein_coding
NM_001001392	CD44	5.51227e-30	44.5382	0	protein_coding
NM_001191036	TRIQK	4.89396e-24	44.4915	0	protein_coding
NM_001033605	BBS9	3.74623e-18	44.3074	0	protein_coding
NM_001136154	ERG	6.64023e-25	44.2869	0	protein_coding
NM_130803	MEN1	9.99689e-19	43.6816	0	protein_coding
NM_182643	DLC1	3.76016e-25	43.6454	0	protein_coding
NM_001199664	PMF1-BGLAP	3.75608e-54	43.6288	0	protein_coding
NM_001127179	MYO7A	1.55135e-25	43.5162	0	unannotated_transcripts
NM_198952	NUDT1	1.73103e-20	43.3042	0	protein_coding
NM_144704	AIFM3	3.91809e-22	43.169	0	protein_coding
NM_001142333	RBFOX1	1.87942e-19	43.1543	0	protein_coding
NR_038416	BZRAP1-AS1	4.41223e-18	43.1211	0	lncRNA
NM_001167916	VEPH1	2.95223e-19	43.0541	0	protein_coding
NR_036578	APTX	6.80278e-18	43.025	0	unannotated_transcripts
NR_073391	ZNF138	8.22646e-18	42.8691	0	protein_coding
NM_001177641	DAG1	4.18805e-21	42.85	0	protein_coding
NM_018723	RBFOX1	7.77897e-21	42.6329	0	protein_coding
NM_001174117	DMXL2	2.79193e-25	42.2241	0	protein_coding
NR_046352	CNOT10	6.75443e-18	42.2195	0	nonsense_mediated_decay
NM_001243116	NFKBIB	2.39127e-23	42.2195	0	protein_coding
NM_001160173	NAT1	1.06643e-19	42.2167	0	protein_coding
NM_001251984	RCAN3	2.98072e-18	42.0428	0	protein_coding
NM_001018091	GCOM1	3.87468e-24	41.773	0	protein_coding
NR_073020	ST3GAL3	4.70186e-26	41.7503	0	protein_coding
NM_201533	DGKZ	4.5246e-18	41.7386	0	protein_coding
NM_198949	NUDT1	1.11851e-20	41.6384	0	protein_coding
NR_024577	SEC61A2	2.43706e-17	41.4336	0	processed_transcript
NM_030932	DIAPH3	2.11238e-22	41.3683	0	protein_coding
NM_001127665	GSN	5.18994e-17	41.1489	0	protein_coding
NR_038415	BZRAP1-AS1	9.73294e-19	41.0313	0	lncRNA
NM_001001574	PDE9A	2.37683e-17	40.9587	0	protein_coding
NM_181888	UBE2D3	1.38728e-24	40.7586	0	protein_coding
NR_037169_5	LOC100507547	5.99847e-17	40.7126	0	unannotated_transcripts
NM_001144008	SLITRK2	3.74636e-23	40.6987	0	protein_coding
NM_001242912	ZFAND6	1.55383e-17	40.5273	0	protein_coding
NM_001171132	FAM3A	3.94444e-17	40.5223	0	protein_coding
NM_001260504	STK31	1.66451e-17	40.4723	0	protein_coding
NM_001162951	SYTL2	4.88802e-36	40.4525	0	protein_coding
NM_001142391	SLC10A3	3.92818e-29	40.3011	0	protein_coding
NR_046382	ZNF195	3.98252e-17	40.0973	0	protein_coding
NM_054034	FN1	8.2219e-18	40.0742	0	protein_coding
NM_139011	HFE	4.67873e-17	39.9798	0	protein_coding
NM_001242361	NRD1	1.00886e-16	39.9474	0	protein_coding
NR_027265	GLG1	6.26851e-24	39.783	0	nonsense_mediated_decay
NM_001098201	GPER	1.84233e-17	39.7749	0	protein_coding
NM_001256959	CLCN6	2.46283e-21	39.6925	0	protein_coding
NM_153767	KCNJ1	1.23962e-20	39.6759	0	protein_coding
NR_047534	CDKN2B-AS1	1.02273e-17	39.6341	0	lncRNA
NM_183013	CREM	3.8379e-19	39.6136	0	protein_coding
NM_001242493	FAM156A	1.30383e-17	39.3832	0	protein_coding
NM_001204421	RGS6	6.2061e-17	39.2738	0	protein_coding
NM_182721	CREM	7.82362e-17	38.9099	0	protein_coding
NR_046135	FAM91A2	7.11505e-21	38.8688	0	unannotated_transcripts
NM_000070	CAPN3	4.59067e-17	38.802	0	protein_coding
NM_022067	VIPAS39	7.01808e-17	38.7184	0	protein_coding
NM_001135729	TOM1	5.43806e-20	38.4761	0	protein_coding
NR_028130	CFL2	8.2098e-17	38.2886	0	nonsense_mediated_decay
NM_001204146	HDAC9	8.51489e-23	38.2316	0	protein_coding
NM_001244962	FRMD3	8.91783e-17	38.0717	0	protein_coding
NR_073577	USP10	6.22344e-42	37.8567	0	nonsense_mediated_decay
NM_001256333	CACNA1G	5.32808e-27	37.8181	0	protein_coding
NR_033818	IKBKB	2.20088e-16	37.6193	0	nonsense_mediated_decay
NM_001204422	RGS6	7.67088e-16	37.5322	0	protein_coding
NR_073083	CRIP2	1.53154e-15	36.9708	0.445571	protein_coding
NM_001012635	IL32	3.84974e-15	36.8476	0.447393	protein_coding
NR_073581	TYSND1	3.95499e-17	36.545	0	processed_transcript
NR_073543	MOK	1.46742e-22	36.5157	0	protein_coding
NM_001242393	ACSS2	1.54741e-19	36.348	0	protein_coding
NM_004449	ERG	1.10028e-21	36.3404	0	protein_coding
NM_001025077	CELF2	2.44952e-47	36.1839	0	protein_coding
NR_045637	BOLA3-AS1	7.0477e-16	36.1358	0	lncRNA
NM_001258414	SLC5A11	7.95714e-17	36.1153	0	protein_coding
NM_001127667	GSN	7.20787e-16	36.0037	0	protein_coding
NR_030765	ATP5SL	6.99644e-16	35.9533	0	protein_coding
NR_073469	EXTL3	2.8598e-16	35.9247	0	unannotated_transcripts
NM_001127585	ING4	1.21223e-15	35.8555	0	protein_coding
NR_036478	TMEM198B	1.04972e-15	35.8551	0	processed_transcript
NM_001018090	GCOM1	5.76919e-21	35.8205	0	protein_coding
NM_001145963	SLC12A4	7.24603e-16	35.7685	0	protein_coding
NM_018679	TCP11	6.60242e-29	35.7478	0	protein_coding
NR_047543	CDKN2B-AS1	2.1103e-18	35.7442	0	lncRNA
NM_144565	DUOXA1	7.12957e-23	35.7432	0	protein_coding
NM_024344	CAPN3	2.51873e-16	35.7297	0	protein_coding
NM_001251983	RCAN3	5.26152e-21	35.5181	0	protein_coding
NM_001164616	FZD6	5.0062e-21	35.4208	0	protein_coding
NM_032944	STK31	1.76094e-16	35.1684	0	protein_coding
NM_144574	WDR20	3.79775e-16	35.0324	0	protein_coding
NM_181291	WDR20	1.12152e-15	35.0174	0	protein_coding
NM_001256812	GRM4	1.3446e-18	34.994	0	protein_coding
NM_032087	PCDHGA7	4.6365e-17	34.9115	0	protein_coding
NM_001105544	ECHDC1	3.86188e-15	34.8203	0	protein_coding
NM_006538	BCL2L11	3.48229e-17	34.7521	0	protein_coding
NM_001242452	IRF5	5.26506e-15	34.6692	0	protein_coding
NR_047553	UBE2V1	9.28431e-21	34.6024	0	unannotated_transcripts
NM_000926	PGR	3.75877e-24	34.537	0	protein_coding
NM_001199262	UCHL5	1.39986e-14	34.5126	0.526148	protein_coding
NM_001170564	HHAT	1.53869e-15	34.4875	0	protein_coding
NM_001244812	FOXP1	4.6067e-16	34.3556	0	protein_coding
NM_001164540	DISC1	3.02402e-17	34.2496	0	protein_coding
NM_134262	RORA	1.09369e-16	34.2394	0	protein_coding
NR_037914	RCHY1	1.64021e-15	34.2272	0	nonsense_mediated_decay
NM_001256693	MELK	3.78545e-15	33.8628	0	protein_coding
NM_001146319	GRAMD3	1.84336e-15	33.7395	0	protein_coding
NM_001199982	NDUFS1	6.61621e-20	33.6006	0	protein_coding
NM_001272019	EPC1	1.96546e-28	33.5823	0	protein_coding
NM_001256239	PGAP2	1.20485e-14	33.5626	0	protein_coding
NM_007169	PEMT	2.97437e-15	33.4555	0	protein_coding
NM_001206996	PPP2R2C	3.21616e-15	33.4369	0	protein_coding
NM_001191009	SRSF10	1.03768e-15	33.3513	0	protein_coding
NM_001242852	RNF146	1.0562e-14	33.3372	0	protein_coding
NM_001168217	ALS2CR11	2.61096e-16	33.3185	0	protein_coding
NR_046051	THTPA	1.6677e-27	33.3106	0	lncRNA
NM_001145255	IKBKG	3.41888e-15	33.2645	0	protein_coding
NR_049750	RTN3	8.65647e-15	33.2427	0	protein_coding
NM_138617	RHCE	2.1725e-22	33.1646	0	protein_coding
NM_001270371	TMEM254	4.60944e-35	32.9791	0	protein_coding
NR_046054	CACNA1G	5.14917e-18	32.8988	0	nonsense_mediated_decay
NM_001145512	NFIA	1.49314e-15	32.8167	0	protein_coding
NR_033948	P2RX7	1.84491e-22	32.6558	0	protein_coding
NM_153766	KCNJ1	3.12466e-15	32.4016	0	protein_coding
NM_001276276	MAZ	6.95965e-20	32.3236	0	protein_coding
NM_172352	CD46	6.67454e-14	32.3067	0.600499	protein_coding
NM_001267059	SNX17	1.02427e-17	32.2782	0	protein_coding
NM_005263	GFI1	1.6562e-14	32.2469	0	protein_coding
NM_172361	CD46	2.49863e-16	32.2341	0	protein_coding
NM_001199821	MDP1	2.19257e-20	32.1645	0	protein_coding
NM_001142595	P4HA1	1.3043e-14	32.0926	0	protein_coding
NM_001100167	MRVI1	4.40539e-15	32.0182	0	protein_coding
NM_031462	CD99L2	4.53367e-14	31.873	0.59329	protein_coding
NR_033953	P2RX7	8.66311e-15	31.783	0	nonsense_mediated_decay
NR_074080	MAZ	1.71453e-22	31.7571	0	protein_coding
NM_205838_7	LST1	1.23917e-14	31.5862	0	unannotated_transcripts
NM_001143674	MPC2	3.52851e-28	31.4972	0	protein_coding
NM_001077358	PDE11A	1.86726e-15	31.4941	0	protein_coding
NR_047607	UTY	1.39574e-14	31.4827	0	protein_coding
NM_001267557	PDCD6	9.66264e-14	31.4819	0.404394	protein_coding
NR_047638	UTY	8.02973e-15	31.3758	0	protein_coding
NM_139008	HFE	6.02323e-14	31.1595	0	protein_coding
NM_014988	LIMCH1	9.8015e-19	31.1037	0	protein_coding
NM_001252660	EPB41L2	2.45703e-14	31.0808	0	protein_coding
NM_001198954	RNF103-CHMP3	3.01002e-14	30.9847	0	protein_coding
NR_037775	MIA-RAB4B	4.63873e-14	30.8791	0	nonsense_mediated_decay
NM_013958	NRG1	2.63692e-14	30.8738	0	protein_coding
NM_001256711	ANAPC10	9.42038e-15	30.8181	0	protein_coding
NM_001258265	UTY	4.06086e-17	30.8171	0	protein_coding
NM_001153690	SCOC	3.80786e-17	30.7908	0	protein_coding
NM_001258273	MLH1	1.38119e-24	30.725	0	protein_coding
NM_001206936_3	AGER	3.98775e-18	30.6666	0	unannotated_transcripts
NM_001145438	PGAP2	2.97541e-33	30.6417	0	protein_coding
NR_037655	BLOC1S1	1.57949e-17	30.5655	0	nonsense_mediated_decay
NM_001178116	ABI1	2.9233e-33	30.5533	0	protein_coding
NM_001256707	ANAPC10	2.05682e-14	30.5193	0	protein_coding
NM_177457	LYNX1	5.72822e-14	30.5072	0	protein_coding
NM_001153585	SCOC	1.8417e-13	30.4951	0.606425	protein_coding
NR_037857	LOC254128	1.21624e-14	30.2122	0	lncRNA
NM_001171133	FAM3A	1.59023e-16	30.1193	0	protein_coding
NM_001269041	CTCFL	3.37383e-15	30.0783	0	protein_coding
NR_047647	UTY	3.74192e-14	30.0098	0	protein_coding
NM_001267068	PLEKHB2	1.29419e-13	29.9166	0	protein_coding
NM_138290	RUNDC3B	4.96905e-18	29.9056	0	protein_coding
NM_001271826	PUS7L	1.30171e-14	29.892	0	protein_coding
NM_001197237	BTN2A2	6.00056e-14	29.8892	0	protein_coding
NM_001127194	CNBP	8.59481e-14	29.8647	0	protein_coding
NM_001199322	BLOC1S5	7.2936e-14	29.6561	0	protein_coding
NM_001258402	SLC4A8	1.34151e-14	29.6469	0	protein_coding
NR_038203	LOC100616530	1.43025e-18	29.6201	0	unannotated_transcripts
NM_018312	PPP6R3	2.89195e-13	29.618	0.443999	protein_coding
NR_047683	BLNK	2.87115e-18	29.5692	0	protein_coding
NM_001256188	SNX12	4.81946e-14	29.3136	0	protein_coding
NM_001258243	TMEM218	8.17864e-18	29.1388	0	protein_coding
NM_198396	CACNA1G	5.42812e-22	29.0744	0	protein_coding
NM_001105545	ECHDC1	5.98315e-13	29.0119	0.547294	protein_coding
NM_001013254	LSP1	1.88858e-14	28.8077	0	protein_coding
NR_049767	SLC7A8	2.08064e-18	28.7234	0	nonsense_mediated_decay
NR_040088	SETD4	2.16871e-17	28.6772	0	unannotated_transcripts
NM_001256186	SNX12	4.49241e-20	28.6413	0	protein_coding
NR_047695	PIGT	1.77945e-13	28.5738	0	protein_coding
NM_001204187	TP73	1.21398e-13	28.5725	0	protein_coding
NM_001172650	ZNF559-ZNF177	1.65363e-13	28.5157	0	protein_coding
NM_001145724	HOMER3	1.29574e-13	28.5068	0	protein_coding
NM_133343	RAD17	1.32077e-19	28.4237	0	protein_coding
NM_138399	TMEM44	2.29703e-13	28.285	0	protein_coding
NR_046372	P2RX4	6.79805e-14	28.2493	0	nonsense_mediated_decay
NM_018903	PCDHA12	1.33881e-17	28.2	0	protein_coding
NM_001199898	PDK2	1.84199e-13	28.1869	0	protein_coding
NM_001256892	SRI	1.32872e-15	28.1607	0	protein_coding
NM_031939	MRO	6.91101e-14	28.1517	0	protein_coding
NM_001178063_3	C2	6.20206e-14	28.1046	0	unannotated_transcripts
NM_001164279	SLC37A4	4.48508e-13	27.9944	0	protein_coding
NR_037634	GJA9-MYCBP	1.77223e-37	27.9483	0	nonsense_mediated_decay
NR_027168	C17orf76-AS1	9.65732e-26	27.9472	0	lncRNA
NM_001142278	APLP2	6.85626e-14	27.8859	0	protein_coding
NM_001258250	UTY	1.85157e-15	27.8595	0	protein_coding
NM_052873	IFT43	2.02569e-13	27.8525	0	protein_coding
NM_001242840	GUK1	7.55188e-13	27.7687	0.460234	protein_coding
NR_033243	UBAP1	4.44918e-13	27.7288	0	protein_coding
NM_001271611	STX10	1.03438e-12	27.6958	0.599289	protein_coding
NM_001144929	NKIRAS2	3.51921e-13	27.6693	0	protein_coding
NR_038246	LOC100507557	1.54869e-54	27.5896	0	unannotated_transcripts
NM_024531	SLC52A2	5.06871e-13	27.583	0	protein_coding
NM_001199752	CPT1C	1.15248e-13	27.4978	0	protein_coding
NM_001197139	DBNDD2	1.01851e-12	27.4335	0.314975	protein_coding
NR_024518	LMAN2L	7.35249e-13	27.204	0	unannotated_transcripts
NM_001184903	CARD8	1.28119e-13	27.1572	0	protein_coding
NM_001001581	PDE9A	8.03093e-13	27.1181	0	protein_coding
NM_001199662	PMF1-BGLAP	6.39392e-29	27.1181	0	protein_coding
NM_182690	EFNA4	1.30071e-16	27.0184	0	protein_coding
NM_001271960	SLC39A1	2.98062e-20	26.8739	0	protein_coding
NM_001136011	FXYD3	1.01132e-12	26.8535	0	protein_coding
NM_173214	NFAT5	4.89653e-12	26.8114	0.596536	protein_coding
NM_182898	CREB5	1.34525e-13	26.8077	0	protein_coding
NR_073448	REEP2	1.34662e-12	26.7776	0	protein_coding
NM_001002756	NFU1	1.01913e-12	26.7692	0	protein_coding
NM_020418	PCBP4	6.64542e-13	26.7556	0	protein_coding
NM_001145670	SORBS2	2.12409e-14	26.7454	0	protein_coding
NM_001129884	TEX264	1.01484e-12	26.6629	0	protein_coding
NM_001258257	UTY	9.78033e-16	26.658	0	protein_coding
NM_001174083	NLRP2	2.29157e-24	26.6228	0	protein_coding
NM_001127192	CNBP	5.29894e-13	26.6064	0	protein_coding
NM_000880	IL7	2.30365e-13	26.5759	0	protein_coding
NM_001146006	IGFALS	4.57782e-14	26.4904	0	protein_coding
NR_038414	BZRAP1-AS1	2.55625e-23	26.3878	0	lncRNA
NM_138717_4	PPT2	1.80737e-12	26.3877	0	unannotated_transcripts
NM_001257235	ALG13	2.95183e-12	26.3594	0.446663	protein_coding
NM_001128921	MARK3	4.78775e-13	26.3304	0	protein_coding
NM_018901	PCDHA10	1.2976e-27	26.2959	0	protein_coding
NM_198964	PTHLH	6.21378e-14	26.2581	0	protein_coding
NM_001111031	ACVR1C	2.20225e-13	26.1573	0	protein_coding
NM_001253914	TBC1D1	1.18899e-13	26.029	0	processed_transcript
NM_033151	ABCC11	1.6188e-13	25.9939	0	protein_coding
NM_001252608	THBS3	1.27649e-12	25.9752	0	protein_coding
NM_004731	SLC16A7	1.8709e-12	25.9455	0	protein_coding
NM_001271790	DYNC1I2	1.97517e-12	25.8644	0	protein_coding
NM_147781	CTSB	1.17565e-12	25.8111	0	protein_coding
NM_001130084	ABLIM2	5.3462e-16	25.7343	0	protein_coding
NR_049784	SNX17	1.43879e-12	25.5963	0	nonsense_mediated_decay
NM_001204888	RAB43	3.44743e-15	25.5418	0	protein_coding
NM_181700	PPP2R1B	1.29181e-12	25.4723	0	protein_coding
NM_003603	SORBS2	1.25711e-14	25.4689	0	protein_coding
NM_182918	ERG	2.85235e-17	25.4462	0	protein_coding
NM_182717	CREM	7.56648e-13	25.4255	0	protein_coding
NM_001185075	FMR1	1.37199e-13	25.3337	0	protein_coding
NM_001011554	SLC13A3	1.11549e-18	25.271	0	protein_coding
NM_001256666	FAM193A	8.33224e-13	25.2424	0	protein_coding
NM_198379	CACNA1G	1.32477e-15	25.2316	0	protein_coding
NM_173217	ST6GAL1	1.22659e-12	25.2166	0	protein_coding
NR_047597	UTY	5.11777e-15	25.1736	0	protein_coding
NM_001256359	CACNA1G	1.81955e-16	25.1065	0	protein_coding
NM_206883	SLC26A5	3.11785e-13	25.1004	0	protein_coding
NM_001134759	CRYZ	2.28364e-29	25.0958	0	protein_coding
NM_001177506	AOAH	3.43432e-19	25.0144	0	protein_coding
NM_001136479	ANP32E	1.65251e-12	24.9984	0	protein_coding
NM_001142426	MORF4L2	8.76817e-12	24.9297	0.424697	protein_coding
NM_001271980	STK25	1.74649e-15	24.9276	0	protein_coding
NM_001163811	WDR81	1.88869e-13	24.923	0	protein_coding
NM_001258342	SLC44A3	3.92461e-13	24.9121	0	protein_coding
NR_033836	PIGA	4.04296e-13	24.8863	0	nonsense_mediated_decay
NM_001039803	CDK20	2.78461e-12	24.8175	0	protein_coding
NM_001184729	PIGT	4.16132e-12	24.8068	0	protein_coding
NM_001161	NUDT2	2.45504e-12	24.7548	0	protein_coding
NM_001258270	UTY	3.72407e-16	24.7262	0	protein_coding
NM_001267066	PLEKHB2	1.48492e-11	24.6433	0.412457	protein_coding
NM_172350	CD46	1.04816e-20	24.6411	0	protein_coding
NM_001271100	PUF60	1.07522e-17	24.6113	0	protein_coding
NM_001029939	ZFAT	6.40964e-13	24.4865	0	protein_coding
NM_001257393	UBE2V1	7.23318e-13	24.4293	0	protein_coding
NM_001165937	STARD3	2.89515e-12	24.4125	0	protein_coding
NM_001171799	TRIQK	5.94942e-18	24.4002	0	protein_coding
NM_002004	FDPS	2.61768e-12	24.3569	0	protein_coding
NM_001195802	LDLR	3.8741e-11	24.3489	0.431095	unannotated_transcripts
NM_020465	NDRG4	1.80703e-12	24.3362	0	protein_coding
NM_153283	HYAL1	3.0533e-19	24.3304	0	protein_coding
NM_153026	PRICKLE1	3.64701e-12	24.3188	0	protein_coding
NM_001202545	CUX1	9.87937e-32	24.2671	0	protein_coding
NM_130898	CREB3L4	2.89742e-12	24.248	0	protein_coding
NM_001127664	GSN	2.10889e-17	24.1959	0	protein_coding
NR_036638	FAM213B	1.11718e-11	24.1102	0.462433	processed_transcript
NM_001184874	GPRASP2	4.29671e-12	24.0895	0	protein_coding
NM_183228	IKZF3	2.26977e-12	23.9182	0	protein_coding
NM_001136033	PUF60	6.40497e-17	23.8847	0	protein_coding
NM_014707	HDAC9	3.03351e-15	23.8529	0	protein_coding
NM_032041	NCALD	2.95672e-12	23.8518	0	protein_coding
NM_001391	DTNA	1.69848e-21	23.7992	0	protein_coding
NM_001001572	PDE9A	1.38971e-11	23.7928	0.613412	protein_coding
NM_001198851	FOXJ3	2.65475e-12	23.7863	0	protein_coding
NM_198705	HSD11B1L	1.23791e-24	23.6576	0	protein_coding
NM_001270735	BCL2L13	1.29931e-16	23.6516	0	protein_coding
NM_001257172	DDX19B	1.00881e-25	23.5292	0	protein_coding
NM_001254729	AP4S1	3.01656e-30	23.5183	0	protein_coding
NR_029431	DNAJC7	1.613e-19	23.4797	0	protein_coding
NM_006385	ZNF211	3.69079e-12	23.4151	0	protein_coding
NR_047513	SLC9B1	2.63682e-12	23.3576	0	nonsense_mediated_decay
NM_001160036	RHOBTB2	1.17212e-17	23.3424	0	protein_coding
NM_138727	ST7L	4.75689e-12	23.3399	0	protein_coding
NM_001135825	RNF185	2.25531e-11	23.324	0.458608	protein_coding
NM_001001585	PDE9A	2.58409e-33	23.2625	0	protein_coding
NR_026826	INTS9	3.60604e-24	23.1808	0	protein_coding
NM_006309	LRRFIP2	1.60523e-12	23.1522	0	protein_coding
NM_001199464	PDCD2	2.7565e-11	23.145	0.518557	protein_coding
NR_048552	NOL10	6.49372e-12	23.1343	0	protein_coding
NM_001206966_5	AGER	1.45817e-23	23.1236	0	unannotated_transcripts
NM_020407	RHBG	1.76487e-11	23.1136	0	protein_coding
NM_000295	SERPINA1	1.87999e-11	22.9594	0	protein_coding
NM_153285	HYAL1	5.44785e-21	22.9524	0	protein_coding
NM_033506	FBXO24	1.74981e-11	22.9204	0	protein_coding
NR_047524	LOC643837	7.11651e-12	22.911	0	lncRNA
NM_001252091	MRAS	3.57313e-12	22.8966	0	protein_coding
NM_201545	LGALS8	2.52194e-12	22.8627	0	protein_coding
NM_145638	OSBPL5	1.69582e-11	22.8317	0	protein_coding
NM_001195104	GSR	5.42591e-12	22.7875	0	protein_coding
NM_001256658	TEAD2	2.33107e-16	22.7487	0	protein_coding
NM_001142576	IMPDH1	1.77206e-17	22.7419	0	protein_coding
NM_031857	PCDHA9	4.95364e-68	22.7341	0	protein_coding
NM_001001577	PDE9A	1.77819e-19	22.7303	0	protein_coding
NM_001242462	GHR	1.43306e-13	22.6923	0	protein_coding
NM_139353	TAF1C	5.96175e-12	22.6437	0	protein_coding
NM_001083113	ZGPAT	1.14521e-30	22.6395	0	protein_coding
NM_001199784	SDCBP2	7.30506e-12	22.5567	0	protein_coding
NM_015415	MPC2	1.7668e-23	22.4851	0	protein_coding
NM_178231	ICA1L	1.50261e-11	22.4844	0	unannotated_transcripts
NM_001172569	MYD88	6.34939e-12	22.4448	0	protein_coding
NM_001242460	GHR	1.42014e-13	22.4429	0	protein_coding
NR_047591	TMEM218	1.82315e-17	22.4061	0	retained_intron
NM_001242524_3	HLA-DPA1	2.87304e-15	22.2802	0	unannotated_transcripts
NM_016820	OGG1	2.53485e-21	22.2724	0	protein_coding
NM_001163673	WDR81	1.35078e-12	22.2318	0	protein_coding
NM_001081455	P2RY14	1.23786e-15	22.0896	0	protein_coding
NM_001093728	TCP11	2.23367e-20	22.0518	0	unannotated_transcripts
NR_033700	FMR1	1.42167e-18	21.9612	0	protein_coding
NM_001135752	ECD	8.15632e-16	21.9416	0	protein_coding
NM_001127706	SERPINA1	1.72816e-11	21.9002	0	protein_coding
NM_001164537	DISC1	3.61824e-15	21.8816	0	protein_coding
NM_001168465	MAP7D2	3.03627e-19	21.8649	0	protein_coding
NM_001135670	MSRA	3.04628e-11	21.8504	0	protein_coding
NM_001178076	ASNS	2.60316e-11	21.8456	0	protein_coding
NM_001256329	CACNA1G	2.08901e-15	21.697	0	protein_coding
NM_001130518	CSGALNACT1	4.64324e-12	21.5855	0	protein_coding
NM_001265590	RTN3	2.56674e-11	21.5348	0	protein_coding
NM_001142430	MORF4L2	7.36252e-11	21.5275	0.472628	protein_coding
NM_001198549	NOL4	9.84705e-13	21.4299	0	protein_coding
NM_001159545	RFPL2	1.49327e-11	21.4235	0	protein_coding
NM_198517	TBC1D10C	2.01561e-12	21.423	0	protein_coding
NM_001256524	ZNF74	1.35612e-13	21.4118	0	protein_coding
NM_170672	RASGRP3	2.73896e-12	21.3891	0	protein_coding
NM_022105	DIDO1	2.14204e-10	21.3626	0.57659	protein_coding
NR_047624	UTY	2.50821e-18	21.173	0	protein_coding
NM_001185096	AIF1L	3.14249e-11	21.1116	0	protein_coding
NM_001185095	AIF1L	2.59448e-11	21.1087	0	protein_coding
NM_001048224	DBNDD2	2.56358e-11	21.0917	0	protein_coding
NM_001258355	HNF4A	2.01567e-14	20.9797	0	protein_coding
NM_022829	SLC13A3	1.81806e-16	20.9698	0	protein_coding
NM_001204868	STX16	1.21691e-11	20.9178	0	protein_coding
NM_001040200	CLDND1	2.62403e-16	20.9167	0	protein_coding
NR_073477	IKZF5	8.29252e-11	20.9009	0.442373	unannotated_transcripts
NM_006334	OLFM1	1.52613e-11	20.8811	0	protein_coding
NR_027682	RPAIN	4.90009e-11	20.8348	0	nonsense_mediated_decay
NM_001128126	AP4S1	4.63172e-24	20.8305	0	protein_coding
NM_198593	C1QTNF1	8.91287e-12	20.8279	0	protein_coding
NM_001142448	SPNS1	1.46415e-11	20.806	0	protein_coding
NR_073582	TYSND1	8.73446e-16	20.8058	0	protein_coding
NM_001007471	TRPM3	5.97248e-22	20.7721	0	protein_coding
NR_073594	TYSND1	2.34134e-11	20.5303	0	processed_transcript
NM_002625	PFKFB1	2.22745e-11	20.5211	0	protein_coding
NM_022442	UBE2V1	1.2605e-16	20.4974	0	protein_coding
NM_001163023	PLK1S1	5.21811e-11	20.4071	0	protein_coding
NM_001143816	BDNF	9.70184e-12	20.3616	0	protein_coding
NM_001010919	FAM26F	2.66483e-11	20.3507	0	protein_coding
NR_073463	MED21	9.19563e-11	20.3197	0	processed_transcript
NM_001257195	KLHL3	4.26378e-12	20.2533	0	protein_coding
NM_001258459	PHKG1	1.56714e-24	20.2425	0	protein_coding
NM_018902	PCDHA11	1.62311e-16	20.1916	0	protein_coding
NM_001204858	TCEB1	3.92612e-11	20.1459	0	protein_coding
NM_001242788	BRF1	4.17422e-11	20.1337	0	protein_coding
NM_001265594	PLEKHG5	1.99187e-10	20.0867	0.599376	protein_coding
NM_022910	NDRG4	1.22581e-15	20.0469	0	protein_coding
NM_001252092	MRAS	7.28486e-11	20.0363	0	protein_coding
NM_001256823	ZNF195	1.23475e-13	20.0362	0	protein_coding
NM_032186	ZNF644	4.0625e-11	19.9642	0	protein_coding
NM_001242461	GHR	1.29783e-13	19.9619	0	unannotated_transcripts
NM_138971	BACE1	9.6061e-11	19.9522	0	protein_coding
NM_201382	PLEC	2.58936e-10	19.9475	0.537827	protein_coding
NR_037173_4	LOC100507463	2.15467e-15	19.9265	0	unannotated_transcripts
NM_001032364	GGT1	1.05319e-10	19.9129	0	unannotated_transcripts
NM_001252051	PCMT1	4.91462e-11	19.8608	0	protein_coding
NM_001112741	KCNC1	1.88739e-11	19.8095	0	protein_coding
NM_001144942	RAB34	2.04377e-11	19.797	0	protein_coding
NM_001261817	TCP11	5.65438e-19	19.796	0	protein_coding
NM_001257414	IKZF3	4.28555e-11	19.7714	0	protein_coding
NM_005714	KCNK7	7.76479e-11	19.6598	0	protein_coding
NM_001243876	SPHK2	1.10993e-10	19.6459	0	protein_coding
NM_001201363	HMGN3	2.02043e-10	19.6089	0.474502	protein_coding
NM_184087	TRIM55	6.51027e-12	19.5277	0	protein_coding
NR_034093	MRVI1-AS1	4.30352e-10	19.4878	0.602755	lncRNA
NM_033239	PML	6.83777e-14	19.3706	0	protein_coding
NM_001267061	SNX17	3.83228e-10	19.362	0.422508	protein_coding
NM_001143826	MAPRE2	2.26071e-11	19.3545	0	protein_coding
NR_033312	BDNF-AS	1.29468e-10	19.3073	0	lncRNA
NM_001008489	PHOSPHO2	4.83945e-16	19.3053	0	protein_coding
NR_049773	KIAA1324	2.66007e-14	19.2959	0	unannotated_transcripts
NM_001244961	FRMD3	3.34416e-11	19.2556	0	protein_coding
NM_130833	OPA1	2.84608e-10	19.2497	0.612788	protein_coding
NM_033167	B3GALNT1	3.74564e-11	19.2444	0	protein_coding
NR_024623	C21orf49	1.29846e-10	19.2327	0	lncRNA
NM_001131015	CIZ1	3.76638e-16	19.2236	0	protein_coding
NM_001135602	GLB1	1.58889e-10	19.2187	0	protein_coding
NR_038830	PIN1	9.98095e-11	19.2102	0	processed_transcript
NM_001242775	TMEM139	4.13276e-13	19.1892	0	protein_coding
NM_001242881	CARKD	1.08541e-15	19.1561	0	protein_coding
NM_172210	CSF1	1.54237e-17	19.1508	0	protein_coding
NM_005693	NR1H3	1.65681e-10	19.1274	0	protein_coding
NM_001200031	HYAL3	1.73088e-10	19.1253	0	protein_coding
NM_001126336	VCAN	2.61583e-25	19.0896	0	protein_coding
NM_001172704	GGA3	4.4137e-23	19.0837	0	protein_coding
NM_001252669	GULP1	1.12213e-14	19.0588	0	protein_coding
NR_073050	DEDD2	1.9399e-15	19.058	0	processed_transcript
NM_001198536	MEFV	1.10712e-11	19.0548	0	protein_coding
NM_001190263	C1D	3.81585e-10	19.0283	0.617083	protein_coding
NM_001258367	DIAPH3	1.08292e-10	19.0151	0	protein_coding
NM_001178122	ABI1	4.0042e-11	19.0107	0	protein_coding
NM_001257234	ALG13	2.04468e-13	18.9816	0	protein_coding
NM_001242839	GUK1	2.08138e-10	18.9772	0	protein_coding
NM_001267552	PEMT	7.62457e-15	18.9703	0	protein_coding
NM_001136129	APP	9.54661e-12	18.9567	0	protein_coding
NR_028327	LOC100133331	2.07377e-11	18.9145	0	unannotated_transcripts
NM_001170688	MIB2	2.47258e-10	18.909	0	protein_coding
NM_024426	WT1	1.66329e-31	18.9066	0	protein_coding
NR_073480	ZNF689	2.37987e-10	18.9056	0	protein_coding
NM_001256336	CHD1L	4.76507e-10	18.9012	0.561774	protein_coding
NM_001005747	CACNB4	3.51629e-11	18.8995	0	protein_coding
NM_001177642	DAG1	1.30293e-10	18.8937	0	protein_coding
NR_052025	SLIRP	8.97846e-11	18.8745	0	nonsense_mediated_decay
NM_001253794	LOC440335	1.93663e-10	18.8464	0	protein_coding
NM_001001568	PDE9A	6.10496e-10	18.8432	0.568315	protein_coding
NM_001143889	BSDC1	1.35928e-10	18.8371	0	protein_coding
NM_001145294	NGLY1	1.03592e-10	18.7853	0	protein_coding
NR_049756	RPP14	1.81379e-10	18.7832	0	unannotated_transcripts
NM_001161575	LRRC36	2.06469e-11	18.7249	0	protein_coding
NM_024424	WT1	3.68466e-31	18.6314	0	protein_coding
NM_174858	AK5	3.87432e-11	18.6234	0	protein_coding
NM_001097641	FUT3	2.23948e-10	18.6037	0	protein_coding
NM_182684	UPK3B	5.91249e-11	18.5737	0	protein_coding
NM_033317	DMKN	2.70911e-11	18.5721	0	protein_coding
NM_001257968	CCDC129	5.99976e-12	18.5648	0	protein_coding
NM_001256046	C19orf12	1.59312e-20	18.5484	0	protein_coding
NM_145352	SCARF1	1.49273e-10	18.5434	0	unannotated_transcripts
NM_001130045	TTLL10	4.07505e-11	18.5227	0	protein_coding
NR_023351	SPRYD7	2.09175e-11	18.5089	0	unannotated_transcripts
NM_001252120	PASK	5.20599e-25	18.4828	0	protein_coding
NM_001145057	IL18BP	4.08439e-17	18.4506	0	protein_coding
NM_001101677	SOHLH1	5.6565e-11	18.4485	0	protein_coding
NM_173544	FAM129C	2.20717e-11	18.3658	0	protein_coding
NM_001017529	PRR5	1.43372e-14	18.3427	0	protein_coding
NM_001177612	CINP	9.48911e-10	18.3061	0.610214	unannotated_transcripts
NR_046394	CMPK1	2.85794e-10	18.3007	0	nonsense_mediated_decay
NM_001166462	MPP1	6.36537e-18	18.275	0	protein_coding
NM_001012412	SGOL1	1.05733e-23	18.27	0	protein_coding
NM_001242776	TMEM139	7.25003e-14	18.2669	0	unannotated_transcripts
NM_148901	TNFRSF18	7.99205e-10	18.2651	0.603016	protein_coding
NM_020182	PMEPA1	9.9542e-18	18.2222	0	protein_coding
NM_001130480	VRK2	2.31105e-10	18.1097	0	protein_coding
NM_001207038	ETV7	3.04261e-11	18.1064	0	protein_coding
NM_001193312	C7orf10	1.21125e-09	18.0929	0.599031	protein_coding
NM_001267060	SNX17	5.93746e-16	18.0925	0	protein_coding
NM_001167868	ATP5SL	3.68555e-19	18.0287	0	protein_coding
NM_000793	DIO2	2.58595e-11	18.0199	0	protein_coding
NM_173841	IL1RN	4.54975e-14	17.9521	0	protein_coding
NM_001256824	ZNF195	6.30782e-16	17.9403	0	protein_coding
NM_001013253	LSP1	6.76619e-11	17.891	0	protein_coding
NM_001270991	EPGN	1.81873e-10	17.8742	0	protein_coding
NM_173092	KCNH6	3.7752e-11	17.848	0	protein_coding
NM_001127603	NMRK1	1.53217e-10	17.8408	0	protein_coding
NM_181528	NAA20	9.96866e-10	17.8335	0.588464	protein_coding
NM_001184945	FAM219A	3.07952e-10	17.8007	0	protein_coding
NM_001100408	C17orf62	1.72241e-09	17.7955	0.631899	protein_coding
NM_138714	NFAT5	6.46699e-10	17.7719	0	protein_coding
NM_001257376	SCFD1	5.75678e-10	17.7526	0	protein_coding
NR_038279	LINC00665	3.15048e-10	17.7362	0	lncRNA
NM_001198898	ACY1	1.20549e-09	17.7137	0.506891	protein_coding
NM_001145109	NELL2	1.47346e-10	17.7114	0	protein_coding
NR_045756	COL25A1	5.82914e-11	17.6612	0	nonsense_mediated_decay
NR_045035	APH1A	2.14435e-13	17.6308	0	protein_coding
NR_040075	LOC100287225	4.04286e-11	17.5918	0	lncRNA
NM_198539	ZNF568	3.8241e-19	17.5886	0	protein_coding
NM_001006943	EPHA8	1.59318e-10	17.5538	0	protein_coding
NM_001258309	NOP2	1.39796e-10	17.5479	0	protein_coding
NM_001243926	MAPKAPK3	6.39403e-11	17.5191	0	protein_coding
NM_001144026	NDOR1	1.61911e-18	17.5029	0	protein_coding
NM_004915	ABCG1	3.46793e-10	17.4934	0	protein_coding
NR_033342	CELF5	1.53405e-10	17.4832	0	nonsense_mediated_decay
NM_000861	HRH1	2.64494e-10	17.4678	0	protein_coding
NM_134426	SLC26A6	5.75477e-10	17.4421	0	protein_coding
NM_001099222	IFT74	3.68721e-10	17.4241	0	protein_coding
NM_001135187	AGFG1	7.93219e-15	17.395	0	protein_coding
NM_001204835	ZNF568	5.10508e-19	17.3941	0	protein_coding
NM_007150	ZNF185	3.18893e-10	17.3834	0	protein_coding
NM_001247988	CTAGE5	4.5145e-10	17.3749	0	protein_coding
NR_045586	SRA1	3.06113e-10	17.3249	0	protein_coding
NM_001270445	RTBDN	1.18824e-09	17.3223	0.60986	protein_coding
NM_001270395	PKIB	2.99065e-20	17.321	0	protein_coding
NM_001083885	DFNB31	7.96411e-13	17.3173	0	protein_coding
NM_001136130	APP	1.77975e-10	17.2898	0	protein_coding
NM_001177996	FAM109A	2.77959e-10	17.2774	0	protein_coding
NR_024435	MAP3K14-AS1	4.57668e-10	17.2366	0	lncRNA
NM_001206691	RFX4	4.51125e-11	17.197	0	protein_coding
NM_198999	SLC26A5	3.50856e-14	17.1169	0	protein_coding
NM_001199981	NDUFS1	8.85328e-15	17.0948	0	protein_coding
NM_001199805	KLRC4-KLRK1	8.7693e-10	17.0733	0	protein_coding
NM_201535	NDRG2	1.90521e-13	17.0577	0	protein_coding
NM_000378	WT1	3.50574e-29	17.0562	0	protein_coding
NM_201596	CACNB2	2.45273e-10	17.038	0	protein_coding
NM_001270460	ST3GAL3	1.07616e-18	17.0363	0	protein_coding
NM_013960	NRG1	1.20841e-16	17.028	0	protein_coding
NM_001195798	LDLR	1.52372e-09	17.0173	0.387587	protein_coding
NM_001252385	TNIP1	1.88362e-09	17.0024	0.670094	protein_coding
NR_073532	STK25	1.66249e-09	16.9889	0.604586	unannotated_transcripts
NM_001256740	GDAP1L1	2.54596e-11	16.9841	0	protein_coding
NM_001243768	APITD1-CORT	3.28747e-10	16.9569	0	protein_coding
NM_001093726	SEPP1	1.79045e-10	16.9321	0	protein_coding
NR_045674	CLIC5	3.85515e-11	16.9259	0	processed_transcript
NM_001256690	MELK	1.14045e-14	16.8827	0	protein_coding
NM_001271442	C21orf2	1.22849e-10	16.8673	0	protein_coding
NM_153759	DNMT3A	8.14273e-10	16.859	0	protein_coding
NM_001032395	GPR126	1.60672e-11	16.8347	0	protein_coding
NM_001258426	SLC4A9	3.61739e-10	16.8337	0	protein_coding
NM_001242842	ZNF195	2.6483e-11	16.826	0	protein_coding
NM_203356	CTAGE5	5.95108e-10	16.8129	0	protein_coding
NM_201538	NDRG2	7.12482e-10	16.7785	0	protein_coding
NM_138559	BCL11A	1.83656e-10	16.7624	0	protein_coding
NM_001164832	FXYD6	2.07688e-10	16.7509	0	protein_coding
NM_001166700	FAM104B	1.9305e-10	16.7313	0	protein_coding
NM_001204502	FLT3LG	2.48529e-10	16.6872	0	protein_coding
NR_046035	CXCL1	4.43373e-08	16.6668	0.85186	protein_coding
NM_198384	CACNA1G	6.90474e-14	16.6645	0	protein_coding
NR_045351	ASPSCR1	3.00259e-09	16.6474	0.644548	protein_coding
NM_001271922	SEC11A	8.26115e-10	16.6336	0	protein_coding
NM_001160004	NRG1	1.89448e-16	16.6145	0	protein_coding
NM_001145648	RASGRF1	1.10444e-10	16.6089	0	protein_coding
NM_001265597	ZNF211	4.07112e-10	16.5376	0	protein_coding
NM_001042495	SLC12A6	6.44969e-14	16.535	0	protein_coding
NM_000054	AVPR2	1.21015e-10	16.5237	0	protein_coding
NM_001242628	GFOD1	8.18492e-10	16.5216	0	protein_coding
NR_073584	IPO11-LRRC70	5.29793e-10	16.5186	0	protein_coding
NM_145074	HTRA2	4.84813e-10	16.4788	0	protein_coding
NR_073056	SLC16A7	1.99735e-18	16.4607	0	nonsense_mediated_decay
NM_017454	STAU1	2.02632e-09	16.425	0.636576	protein_coding
NM_013987	PARK2	5.46792e-10	16.4231	0	protein_coding
NM_001160167	PRR5L	4.82721e-10	16.4147	0	protein_coding
NM_001166035	SBSN	4.6936e-10	16.3976	0	protein_coding
NM_025104	DBF4B	1.41308e-10	16.394	0	protein_coding
NM_006786	UTS2	8.38092e-10	16.3531	0	protein_coding
NR_047589	TMEM218	6.2815e-13	16.3527	0	processed_transcript
NM_001170806	C8orf47	1.42549e-09	16.3439	0	protein_coding
NM_001258432	NDRG1	1.27526e-09	16.2934	0	protein_coding
NR_027779	TTLL1	9.99462e-10	16.2743	0	nonsense_mediated_decay
NM_001142634	SPDYA	2.70035e-10	16.2311	0	protein_coding
NM_175840	SMOX	5.23685e-10	16.2284	0	protein_coding
NM_001165882	ZNF268	9.20225e-10	16.2175	0	protein_coding
NM_001142339	GNAL	3.43589e-14	16.2145	0	protein_coding
NM_001242835	NDRG4	1.03031e-12	16.2107	0	protein_coding
NR_033685	PCYT2	3.44433e-10	16.2107	0	unannotated_transcripts
NM_001276346	TNNT2	3.0189e-10	16.189	0	protein_coding
NM_016619	PLAC8	1.88885e-10	16.1865	0	protein_coding
NR_051974	CREM	5.45079e-10	16.1809	0	unannotated_transcripts
NM_015265	SATB2	7.38275e-10	16.1786	0	protein_coding
NR_046139	FAM91A2	3.63193e-16	16.1748	0	unannotated_transcripts
NR_024205	LINC00152	6.12555e-10	16.1712	0	lncRNA
NM_198883	MTX1	1.19918e-09	16.1599	0	protein_coding
NM_001243659	GLRX	1.94417e-09	16.158	0	protein_coding
NM_001243399	GLRX2	2.75023e-10	16.1451	0	protein_coding
NM_213594	RFX4	1.74146e-14	16.1374	0	protein_coding
NM_203285	PVRL1	2.26488e-10	16.1297	0	protein_coding
NM_001170633	C12orf56	2.33776e-10	16.1266	0	protein_coding
NM_001242405	GHR	1.12823e-13	16.1019	0	protein_coding
NM_170712	RASSF1	1.06142e-09	16.0913	0	protein_coding
NM_001198588	JMJD7-PLA2G4B	2.84916e-10	16.042	0	protein_coding
NM_001190455	CHRNA7	9.90612e-10	16.0384	0	protein_coding
NM_001039660	IL18BP	2.39045e-21	16.0377	0	protein_coding
NM_004484	GPC3	6.23138e-10	16.028	0	protein_coding
NM_003988	PAX2	2.10679e-14	16.0038	0	protein_coding
NR_024474_1	UBE2Q2P3	6.30223e-10	15.9859	0	unannotated_transcripts
NM_001098173	PRDM7	2.43105e-10	15.9824	0	protein_coding
NM_001135954	UCK1	2.76371e-09	15.9673	0.510112	protein_coding
NM_001242539	NCOA6	5.0299e-10	15.9654	0	protein_coding
NM_145796	POGZ	5.45786e-12	15.9352	0	protein_coding
NM_001243755	C7orf49	1.04693e-11	15.9337	0	protein_coding
NM_144729	DUSP10	6.78452e-10	15.9304	0	unannotated_transcripts
NM_001270728	BCL2L13	6.20445e-24	15.8576	0	protein_coding
NM_001146321	GRAMD3	7.32658e-10	15.8466	0	protein_coding
NM_001276262	RGS3	7.02678e-18	15.8428	0	protein_coding
NM_001206729	AKT3	1.23767e-10	15.8391	0	protein_coding
NM_001197108	SCHIP1	3.5068e-110	15.8351	0	protein_coding
NM_001199257	SGOL1	5.63288e-09	15.8277	0.549982	protein_coding
NM_001048199	RCC1	1.11521e-09	15.8134	0	protein_coding
NM_173074	PIGF	6.65924e-10	15.8092	0	protein_coding
NM_001017415	USP1	8.59222e-10	15.8069	0	protein_coding
NM_170724	PKHD1	2.40664e-11	15.8027	0	protein_coding
NM_001142301	TMEM67	5.73336e-10	15.7681	0	protein_coding
NM_001202406	ZNF559	2.87908e-09	15.7609	0	protein_coding
NM_001191002	GSTO1	1.00266e-09	15.755	0	protein_coding
NR_029472	SNRPC	1.6722e-09	15.7505	0	protein_coding
NM_001256214	ATP1A3	7.19733e-10	15.7435	0	protein_coding
NM_001128304	PLSCR4	3.14637e-10	15.7337	0	protein_coding
NR_037612	SEPT5-GP1BB	5.15878e-10	15.7297	0	nonsense_mediated_decay
NM_001159701	FHL1	1.15341e-09	15.7286	0	protein_coding
NM_001167618	MLH1	3.78599e-16	15.7279	0	protein_coding
NM_001097599	SLC35G2	2.02072e-09	15.7274	0	protein_coding
NM_006625	SRSF10	3.76212e-19	15.7013	0	protein_coding
NR_036472	ENY2	3.60863e-10	15.6873	0	nonsense_mediated_decay
NR_075075	C18orf8	1.38962e-09	15.658	0	unannotated_transcripts
NR_027349	MIR17HG	7.80107e-10	15.6563	0	lncRNA
NM_001127695	CTSA	2.77678e-09	15.629	0	protein_coding
NM_024960	PANK2	1.49038e-09	15.6121	0	protein_coding
NM_001099400	SGCE	3.87693e-10	15.6043	0	protein_coding
NM_003877	SOCS2	2.8592e-10	15.6026	0	protein_coding
NM_001100875	MARCH10	1.108e-10	15.5952	0	protein_coding
NM_001257988	TYMP	7.30769e-10	15.5929	0	protein_coding
NM_001135592	RPS27A	3.13392e-09	15.5602	0	protein_coding
NR_038104	TECR	1.77573e-09	15.5503	0	processed_transcript
NM_001244960	FRMD3	1.50019e-09	15.5133	0	protein_coding
NM_001244569	BID	1.36808e-13	15.5044	0	protein_coding
NR_073379	JPH3	7.80352e-11	15.497	0	processed_transcript
NM_001270507	TNFAIP3	6.47637e-08	15.496	0.596708	protein_coding
NM_001257342	BCS1L	3.51117e-09	15.4945	0.601539	protein_coding
NM_001164276	ZNF44	5.11926e-09	15.476	0.739213	protein_coding
NM_004298	NUP155	3.11835e-09	15.4606	0	protein_coding
NM_021233	DNASE2B	1.23747e-09	15.4524	0	protein_coding
NM_005042	PRH2	1.2911e-10	15.444	0	unannotated_transcripts
NM_033128	SCIN	8.21757e-11	15.4291	0	protein_coding
NM_001128627	SPIRE1	3.44782e-17	15.4193	0	protein_coding
NM_139070	MAPK9	3.32115e-09	15.4159	0	protein_coding
NM_001256483	EPHX2	9.95838e-17	15.4067	0	protein_coding
NM_001128220	VGLL4	1.37762e-19	15.4055	0	protein_coding
NM_001146276	NCEH1	5.53573e-09	15.4043	0.688776	protein_coding
NM_001256732	SSBP2	1.93613e-13	15.4003	0	protein_coding
NR_073127	AKR1E2	2.49494e-14	15.388	0	protein_coding
NM_001256621	R3HCC1L	7.18723e-29	15.3838	0	protein_coding
NM_001257973	CTSL1	6.44723e-15	15.3775	0	protein_coding
NM_001256325	CACNA1G	2.25152e-21	15.3564	0	protein_coding
NM_001145717	PNPLA1	2.85152e-13	15.347	0	protein_coding
NM_001136009	FXYD3	1.11393e-09	15.3326	0	protein_coding
NR_046136	FAM91A2	9.56472e-16	15.3324	0	unannotated_transcripts
NM_001017528	PRR5	8.57208e-17	15.3136	0	protein_coding
NM_001085426	ARSA	9.40505e-10	15.3113	0	protein_coding
NM_002036	DARC	1.10718e-10	15.2962	0	protein_coding
NM_001164460	STEAP1B	3.84472e-10	15.2723	0	protein_coding
NM_001142762	KNSTRN	3.15676e-09	15.2609	0	protein_coding
NM_001242948	EPDR1	5.90569e-10	15.2572	0	protein_coding
NM_001271828	PRELID1	2.0838e-09	15.257	0	protein_coding
NM_139006	HFE	2.37581e-09	15.2379	0	protein_coding
NM_003925	MBD4	3.47158e-09	15.2359	0	protein_coding
NM_001082973	CASC1	1.16069e-09	15.2247	0	protein_coding
NM_001166209	SYNPO	1.56818e-09	15.1956	0	protein_coding
NM_001146051	HSDL1	8.71808e-09	15.1805	0.738737	protein_coding
NM_018914	PCDHGA11	2.42583e-10	15.1654	0	protein_coding
NM_001143941	RBM24	1.23358e-09	15.156	0	protein_coding
NM_001012756	ZNF260	2.16451e-13	15.1524	0	protein_coding
NM_001006612	WBP5	2.48038e-09	15.147	0	protein_coding
NM_001270837	CRIP2	1.80045e-33	15.1187	0	protein_coding
NM_001193380	IL17RE	5.62357e-09	15.1085	0.624519	protein_coding
NM_001018074	NR3C1	2.863e-18	15.0972	0	protein_coding
NM_001145266	SLC35C1	1.50753e-09	15.0805	0	protein_coding
NM_001271213	SQRDL	4.23035e-09	15.0787	0	protein_coding
NM_178272	PILRA	5.3055e-10	15.0701	0	protein_coding
NM_001098819	PDE4C	1.07753e-09	15.0628	0	protein_coding
NM_001079668	NKX2-1	5.10645e-10	15.0585	0	protein_coding
NM_001130413	SCNN1D	4.65038e-09	15.0516	0	protein_coding
NM_001204398	PITX2	1.4881e-09	15.0416	0	protein_coding
NM_198434	AURKA	9.62126e-09	15.0267	0.624428	protein_coding
NR_047598	UTY	2.28486e-20	15.0213	0	protein_coding
NM_001202555	CD44	1.79388e-13	15.0077	0	protein_coding
NM_030629	CMIP	1.59825e-09	15.0059	0	protein_coding
NM_001012762	CTU2	9.56978e-09	14.9975	0.635543	protein_coding
NR_046188	NBPF24	4.31019e-10	14.9956	0	protein_coding
NM_001256321	THTPA	5.16501e-11	14.9923	0	protein_coding
NM_001163377	QPCTL	9.77013e-10	14.9756	0	protein_coding
NM_001193322	IKBKE	2.11881e-08	14.9688	0.920096	protein_coding
NM_001190738	NFIB	2.97817e-13	14.9639	0	protein_coding
NM_144996	ARL13B	8.73446e-14	14.9507	0	protein_coding
NM_032546	TRIM54	1.56137e-09	14.9504	0	protein_coding
NM_001161581	POC1A	7.63284e-09	14.9471	0.613947	protein_coding
NM_001163125	RDM1	1.28633e-22	14.8827	0	protein_coding
NM_014217	KCNK2	8.52551e-11	14.8791	0	protein_coding
NM_001142317	TXNL4B	1.92973e-09	14.8758	0	protein_coding
NM_001256428	PDLIM5	5.13852e-09	14.8734	0	protein_coding
NR_048555	PSMD9	3.52121e-09	14.8714	0	protein_coding
NM_001270708_1	NRM	1.20292e-09	14.8696	0	unannotated_transcripts
NR_037573	DCTN5	2.77578e-09	14.8519	0	protein_coding
NM_001146111	MIER1	2.27459e-20	14.8185	0	protein_coding
NM_001258463	PAX6	6.99448e-10	14.8054	0	protein_coding
NM_024859	MAGIX	8.70888e-14	14.8015	0	protein_coding
NR_002949	NUDT16P1	7.96299e-09	14.7997	0.789815	processed_transcript
NM_001159702	FHL1	1.35741e-15	14.7978	0	protein_coding
NM_001258041	HARS	6.39199e-09	14.7977	0.622239	protein_coding
NM_001199758	MTHFS	9.35156e-10	14.7687	0	protein_coding
NR_045259	NRP1	1.4118e-09	14.7518	0	protein_coding
NM_001193635	DHRS4L2	9.31515e-10	14.7494	0	protein_coding
NM_148173	PEMT	1.84908e-08	14.7341	0.568797	protein_coding
NM_001042461	TRAPPC5	1.56239e-08	14.7288	0.686027	protein_coding
NM_001136125	CCND3	4.87471e-09	14.7242	0	protein_coding
NM_001161465	JMJD4	1.1278e-08	14.7163	0.687294	protein_coding
NM_001195054	DDIT3	2.8237e-09	14.71	0	protein_coding
NR_033699	FMR1	1.34761e-12	14.6949	0	protein_coding
NM_001135685	LTK	2.68382e-09	14.6918	0	protein_coding
NM_001270993	EPGN	2.60985e-09	14.6918	0	protein_coding
NM_001164605	FXYD5	6.01221e-09	14.6907	0	protein_coding
NM_001007068	SDCBP	5.63812e-15	14.6885	0	protein_coding
NR_040110	ELP2	6.22037e-09	14.6776	0.49336	protein_coding
NM_001142676	CHID1	1.50324e-09	14.6694	0	protein_coding
NM_144499	GNAT1	1.94354e-10	14.6584	0	protein_coding
NM_007182	RASSF1	1.2504e-08	14.6435	0.874356	protein_coding
NM_001198902	YY1AP1	5.60117e-09	14.6164	0	protein_coding
NM_079837	BANP	1.85556e-09	14.609	0	protein_coding
NM_001008541	MXI1	2.69919e-09	14.6019	0	protein_coding
NM_001130487	NDRG4	1.12902e-19	14.5789	0	protein_coding
NM_001207042	PRMT1	2.8727e-09	14.5606	0	protein_coding
NM_001005741	GBA	1.31474e-08	14.5586	0.735773	protein_coding
NR_033429	ABTB1	1.16241e-08	14.5546	0.705313	nonsense_mediated_decay
NR_027368	POP4	7.62364e-09	14.554	0.596965	protein_coding
NM_001135148	SLC39A8	3.78582e-09	14.5419	0	protein_coding
NM_001159546	RFPL2	1.11557e-11	14.5294	0	protein_coding
NR_073604	ATG12	1.42221e-08	14.5256	0.676851	unannotated_transcripts
NM_001199679	TMEM56	4.86729e-10	14.5144	0	protein_coding
NM_153013	NADKD1	6.72885e-09	14.5052	0	protein_coding
NM_001163560	MEIOB	6.66641e-10	14.5004	0	protein_coding
NM_018192	LEPREL1	7.88809e-10	14.4889	0	protein_coding
NR_073567	GHRLOS	2.94547e-19	14.4718	0	unannotated_transcripts
NM_001126121	SLC25A19	8.20991e-09	14.4366	0.53121	protein_coding
NM_001206838	PTPRZ1	3.1936e-11	14.4165	0	protein_coding
NM_001190947	TRAF1	4.39358e-09	14.4148	0	protein_coding
NR_046202	C19orf47	8.70595e-09	14.4145	0.478797	protein_coding
NM_001256647	NR1H2	1.96868e-09	14.411	0	protein_coding
NM_001142499	FLYWCH2	2.20587e-08	14.4071	0.69702	protein_coding
NM_001206839	PTPRZ1	3.57367e-11	14.3971	0	protein_coding
NR_002596	RFPL3S	2.44767e-09	14.3908	0	lncRNA
NR_049728	PSMG1	1.37359e-08	14.3879	0.740765	nonsense_mediated_decay
NM_001207064	CXADR	6.7823e-09	14.3859	0	protein_coding
NR_034098	EML2	4.12357e-09	14.3852	0	unannotated_transcripts
NM_001191022	CTCF	8.44288e-10	14.383	0	protein_coding
NR_027830	BCAP29	1.73052e-09	14.352	0	protein_coding
NM_138485	GTPBP8	1.34754e-08	14.3451	0.715569	protein_coding
NM_144624	UHMK1	2.2842e-09	14.3423	0	protein_coding
NM_020692	GALNT16	1.24129e-10	14.3249	0	protein_coding
NM_001142469	C16orf45	8.70817e-10	14.3165	0	protein_coding
NM_153436	ODF2	4.4548e-10	14.3138	0	protein_coding
NM_001035534	FAM129B	5.0507e-08	14.3092	1.66454	protein_coding
NM_001166036	ZNF260	4.83385e-13	14.3054	0	protein_coding
NM_003833	MATN4	2.69115e-09	14.3053	0	protein_coding
NM_001164280	SLC37A4	2.86477e-08	14.3036	0.670602	protein_coding
NM_001204091	RPS10	3.73082e-09	14.2917	0	protein_coding
NM_001038633	RSPO1	8.86792e-10	14.2904	0	protein_coding
NM_001142599	P4HA2	3.53924e-09	14.2781	0	protein_coding
NM_001207014	SERPINH1	1.98204e-08	14.2614	0.909742	protein_coding
NM_001199922	SIAE	3.84323e-09	14.2577	0	protein_coding
NM_001136140	CMPK1	4.75859e-09	14.2478	0	protein_coding
NM_024728	C7orf10	7.22382e-09	14.243	0	protein_coding
NM_001122834	HHAT	9.93582e-10	14.237	0	protein_coding
NM_001256748	SSUH2	2.46629e-09	14.2243	0	protein_coding
NR_046389	ASIC1	7.00212e-09	14.2242	0	nonsense_mediated_decay
NR_049738	METTL21D	1.62358e-08	14.2206	0.634887	nonsense_mediated_decay
NM_001257972	CTSL1	7.82011e-09	14.2091	0	protein_coding
NR_073610	PAQR6	5.87436e-09	14.2065	0	protein_coding
NM_001270615	DEDD2	2.33917e-12	14.1741	0	protein_coding
NM_001242798	ZNF322	5.08796e-09	14.1685	0	protein_coding
NM_001040165	C16orf13	1.03558e-08	14.168	0.418107	protein_coding
NM_001199753	CPT1C	1.43952e-09	14.1482	0	protein_coding
NR_034151	LOC730227	8.0873e-09	14.129	0	lncRNA
NM_172217	IL16	1.1157e-10	14.1225	0	protein_coding
NM_024558	METTL21D	8.00125e-09	14.1222	0	protein_coding
NR_049790	PLEKHB2	9.84366e-24	14.1129	0	unannotated_transcripts
NM_001258423	SMS	4.67712e-09	14.1117	0	protein_coding
NM_018912	PCDHGA1	1.12479e-18	14.0946	0	protein_coding
NR_046009	ZMAT1	1.07336e-09	14.0888	0	unannotated_transcripts
NM_018100	EFHC1	1.85797e-09	14.0844	0	protein_coding
NR_074078	RGS3	3.5079e-09	14.0788	0	unannotated_transcripts
NM_032979	DTNA	7.81415e-10	14.0761	0	protein_coding
NM_001199881	EGR3	1.1353e-08	14.0693	0.866301	unannotated_transcripts
NM_001271429	EMC1	6.25216e-12	14.0687	0	protein_coding
NM_001077195	ZNF436	2.1639e-09	14.0606	0	protein_coding
NM_198537	YJEFN3	3.25532e-09	14.0602	0	protein_coding
NM_001164732	REEP1	1.52725e-09	14.0569	0	protein_coding
NM_001007100	SCP2	2.18881e-17	14.0487	0	protein_coding
NR_073565	DNLZ	7.10074e-09	14.0456	0	protein_coding
NM_001114172	PIK3R3	8.43372e-10	14.0404	0	protein_coding
NM_002344	LTK	7.69712e-09	14.0386	0	protein_coding
NM_001127700	SERPINA1	3.57609e-09	14.0247	0	protein_coding
NM_183231	IKZF3	3.73266e-12	14.0235	0	protein_coding
NM_080741	NEU4	8.15363e-10	14.0152	0	protein_coding
NM_001143681	GSTK1	5.6372e-09	14.0087	0	protein_coding
NM_207521	RTN4	1.28783e-09	13.9883	0	protein_coding
NR_023313	CIRBP	1.23899e-08	13.9852	0.407657	nonsense_mediated_decay
NM_001166102	NDUFV1	9.98391e-09	13.9807	0.45618	protein_coding
NR_073082	CRIP2	8.06752e-13	13.9711	0	protein_coding
NM_001014990	MRPL22	7.21046e-09	13.9704	0	protein_coding
NM_001003715	RECQL5	1.71522e-09	13.9598	0	protein_coding
NM_001130964	PLCD1	2.11786e-09	13.9515	0	protein_coding
NR_073479	IKZF5	6.54377e-20	13.9301	0	unannotated_transcripts
NM_001199125	COPS3	2.66686e-09	13.9276	0	protein_coding
NM_001207036	ETV7	1.84596e-09	13.9264	0	protein_coding
NM_176071	P2RY2	7.86178e-09	13.9249	0	protein_coding
NR_073081	CRIP2	8.21829e-09	13.9236	0	retained_intron
NM_001145398	TEF	5.56215e-09	13.9071	0	protein_coding
NM_001253853	AP4B1	6.41279e-09	13.8838	0	protein_coding
NM_001256418	ATPAF1	4.36682e-09	13.8833	0	protein_coding
NM_144591	C10orf32	6.31457e-09	13.8799	0	protein_coding
NM_001195108	TLR10	1.19947e-09	13.8799	0	protein_coding
NM_001166118	NT5C3	1.41244e-08	13.8757	0.929962	protein_coding
NM_001256119	NAA10	4.05552e-09	13.8559	0	protein_coding
NM_001242644	RAB2A	1.29199e-09	13.853	0	protein_coding
NM_001042520	C2orf88	4.4139e-09	13.8508	0	protein_coding
NM_001171201	UBAP1	9.12481e-09	13.8505	0	protein_coding
NM_001137554	MCTS1	3.22993e-09	13.8504	0	protein_coding
NM_001008726	WDR89	4.10873e-09	13.8357	0	protein_coding
NM_001172672	PNPLA4	1.01404e-12	13.8257	0	protein_coding
NR_027752	ALDH1L2	5.55938e-09	13.8192	0	protein_coding
NM_001204450	CCPG1	8.63142e-12	13.8143	0	protein_coding
NM_001007794	CEPT1	1.03169e-08	13.8069	0	protein_coding
NM_006484	DYRK1B	5.31928e-09	13.802	0	protein_coding
NM_001168272	ITPR1	2.89317e-09	13.7987	0	protein_coding
NM_001144758	PHLDB1	1.98369e-09	13.7952	0	protein_coding
NR_028451	BCAT2	2.91001e-09	13.7856	0	unannotated_transcripts
NM_001199329	FPGT	1.82343e-09	13.7856	0	protein_coding
NM_001004440	FAM19A3	8.89771e-09	13.7732	0	protein_coding
NM_001167599	NEU4	7.53396e-10	13.7617	0	protein_coding
NM_004199	P4HA2	2.41699e-08	13.7564	0.921	protein_coding
NR_027286	FLVCR1-AS1	1.10579e-08	13.7524	0	lncRNA
NM_017526	LEPROT	1.80532e-08	13.749	0.601452	protein_coding
NM_001170938	ISYNA1	1.62271e-08	13.7409	0.448611	protein_coding
NM_001166699	FAM104B	1.25001e-08	13.7372	0.706637	protein_coding
NM_001198807	MSANTD3	1.0538e-08	13.7302	0	protein_coding
NM_001136493	MFSD2A	5.12093e-09	13.7226	0	protein_coding
NM_019624	ABCB9	5.91308e-09	13.7073	0	protein_coding
NM_001204268	FXYD6-FXYD2	1.70258e-40	13.7035	0	protein_coding
NM_001143999	SEC14L1	6.69823e-09	13.6709	0	protein_coding
NM_013348	KCNJ14	2.8443e-09	13.6686	0	protein_coding
NM_001271856	GRASP	4.85893e-09	13.6628	0	protein_coding
NM_001243960	NEDD4L	3.46392e-09	13.6495	0	protein_coding
NM_001171507	MCFD2	3.44912e-09	13.6463	0	protein_coding
NM_001252512	SOAT1	2.26772e-09	13.6394	0	protein_coding
NM_001103154	ARL17B	3.55586e-14	13.6256	0	protein_coding
NM_001193535	FBXL5	1.7426e-08	13.6156	0.916139	protein_coding
NM_001199158	KAT7	7.38924e-09	13.6004	0	protein_coding
NM_001164731	REEP1	3.96772e-09	13.5942	0	protein_coding
NM_024885	TAF7L	8.30712e-09	13.5862	0	protein_coding
NM_145812	AIFM1	2.03736e-09	13.5723	0	protein_coding
NM_001145020	C6orf52	1.75539e-09	13.5691	0	protein_coding
NM_001098623	OBSCN	1.33394e-10	13.5685	0	protein_coding
NM_001271609	STX10	8.6729e-09	13.5681	0	protein_coding
NM_033171	B3GALT5	6.57866e-14	13.566	0	protein_coding
NM_001114619	MGAT1	4.09485e-08	13.5609	0.370845	protein_coding
NM_001201549	SLC16A4	7.452e-10	13.5558	0	protein_coding
NM_001008211	OPTN	1.97107e-08	13.5482	0.930702	protein_coding
NM_001257329	ARRB2	6.58496e-15	13.5406	0	protein_coding
NR_027353	CD8A	2.05854e-09	13.5378	0	protein_coding
NM_015216	PPIP5K2	1.35634e-08	13.5352	0.907806	protein_coding
NM_001178061	SEMA6C	2.69533e-09	13.5282	0	protein_coding
NM_001199811	INTS7	1.35245e-08	13.5281	0	protein_coding
NM_001243723	SETMAR	5.88052e-21	13.5276	0	protein_coding
NM_001142886	EPHX3	3.27546e-09	13.5177	0	protein_coding
NM_001174089	SLC4A11	1.64317e-08	13.5127	0.893639	protein_coding
NM_001204367	MGST2	2.14647e-09	13.496	0	protein_coding
NM_052877	MED8	2.04352e-09	13.4877	0	protein_coding
NM_001006665	RPS6KA1	6.96793e-09	13.4761	0	protein_coding
NM_001136	AGER	1.93845e-13	13.4675	0	protein_coding
NR_033386	KLHDC9	2.15919e-11	13.4495	0	processed_transcript
NM_001257989	TYMP	1.11769e-08	13.439	0	protein_coding
NM_139027	ADAMTS13	3.4328e-09	13.4321	0	protein_coding
NM_178586	PPP2R5C	1.56559e-08	13.4275	0.536854	protein_coding
NM_000425	L1CAM	1.03945e-16	13.4249	0	protein_coding
NM_139069	MAPK9	2.22933e-09	13.4212	0	protein_coding
NM_001127219	ACCS	9.34546e-10	13.4188	0	protein_coding
NM_001146320	GRAMD3	4.08924e-08	13.4107	0.903611	protein_coding
NM_020451	SEPN1	9.94183e-09	13.408	0	protein_coding
NR_033191	PPP2R2D	1.57402e-08	13.391	0.72538	nonsense_mediated_decay
NM_001190809	DHX35	8.21681e-09	13.3898	0	protein_coding
NM_001081003	COMMD5	3.09555e-09	13.3832	0	protein_coding
NM_001159996	NRG1	1.38607e-09	13.3783	0	protein_coding
NM_206884	SLC26A5	4.27547e-10	13.3759	0	protein_coding
NM_001256129	ARL8A	6.97881e-09	13.3695	0	protein_coding
NM_005278	GPM6B	2.89546e-11	13.3636	0	protein_coding
NM_001206836	RAB11A	6.23306e-09	13.3542	0	protein_coding
NM_001168341	TTC39B	3.30634e-14	13.3461	0	protein_coding
NM_001164617	GPC3	3.62497e-12	13.3405	0	protein_coding
NM_001198645	TRIM6	7.44347e-13	13.3288	0	protein_coding
NM_031934	RAB34	1.57734e-11	13.3141	0	protein_coding
NR_033701	AIF1L	3.61997e-08	13.3073	0.410162	nonsense_mediated_decay
NM_001007239	METTL13	3.83541e-09	13.2999	0	protein_coding
NM_000085	CLCNKB	7.0248e-10	13.2998	0	protein_coding
NM_212469	CHKA	4.13541e-08	13.2986	0.909566	protein_coding
NR_047649	SLC38A9	5.52528e-12	13.2972	0	nonsense_mediated_decay
NM_001271021	AKR1E2	1.38525e-09	13.2776	0	protein_coding
NM_032092	PCDHGA11	1.37262e-08	13.2772	0	protein_coding
NR_033654	TAC3	4.3899e-14	13.2685	0	nonsense_mediated_decay
NM_012481	IKZF3	1.17849e-12	13.2387	0	protein_coding
NM_001256944	CLCN4	6.41387e-09	13.2296	0	protein_coding
NM_002636	PHF1	1.87049e-09	13.2272	0	protein_coding
NM_001145138	RELA	1.72497e-08	13.202	0.514563	protein_coding
NM_015716	MINK1	1.99294e-08	13.1911	0.724113	protein_coding
NM_016325	ZNF274	2.06446e-08	13.1742	0.920638	protein_coding
NM_001271669	DTNBP1	1.16517e-08	13.1731	0	protein_coding
NR_030722	FAM104B	6.92658e-09	13.1726	0	protein_coding
NM_175842	SMOX	1.60561e-10	13.1725	0	protein_coding
NM_001126108	SLC12A3	1.61077e-10	13.1628	0	protein_coding
NM_198194	STOM	3.33458e-09	13.1606	0	protein_coding
NM_001126051	HDGF	6.71011e-09	13.1565	0	protein_coding
NR_023922	DHRS4-AS1	9.63964e-15	13.1429	0	lncRNA
NR_024519	LMAN2L	1.62216e-17	13.1274	0	unannotated_transcripts
NM_004883	NRG2	2.56306e-09	13.1268	0	protein_coding
NM_001251991	GMNN	3.53061e-09	13.1036	0	protein_coding
NR_047592	TMEM218	1.93478e-08	13.0716	0.474502	protein_coding
NM_001256482	EPHX2	6.80316e-13	13.0693	0	protein_coding
NM_003822	NR5A2	5.82304e-09	13.0656	0	protein_coding
NM_001251845	TRPC1	9.12054e-09	13.0614	0	protein_coding
NM_182666	UBE2E1	8.1476e-09	13.061	0	protein_coding
NM_001083111	GNRH1	1.62608e-09	13.0564	0	protein_coding
NM_001142673	ATG13	8.90555e-16	13.0559	0	protein_coding
NR_073200	ADARB1	7.05015e-13	13.0518	0	nonsense_mediated_decay
NM_001243743	FANCC	4.50624e-09	13.0514	0	protein_coding
NM_001162894	KIAA0040	2.0991e-08	13.0374	0.602842	protein_coding
NM_024840	ZNF613	1.45499e-08	13.0089	0	protein_coding
NM_000772	CYP2C18	4.91535e-09	13.0084	0	protein_coding
NM_199136	FAM221A	4.67769e-09	13.0074	0	protein_coding
NM_001144009	SLITRK2	6.48983e-12	13.0047	0	protein_coding
NM_001080976	DSE	5.91573e-09	12.9924	0	protein_coding
NM_139049	MAPK8	9.87685e-09	12.9839	0	protein_coding
NM_021723	ADAM22	7.31491e-09	12.9803	0	protein_coding
NR_028039	GATS	9.07019e-09	12.9753	0	processed_transcript
NR_045791	NSUN4	9.18465e-09	12.9696	0	nonsense_mediated_decay
NM_139343	BIN1	2.81815e-09	12.9675	0	protein_coding
NR_048538	SLC9A8	5.56202e-09	12.9648	0	protein_coding
NM_001167903	MFSD1	3.1045e-08	12.9543	0.749824	protein_coding
NM_013229	APAF1	6.36488e-09	12.9471	0	protein_coding
NM_006657	FTCD	2.15738e-11	12.9324	0	protein_coding
NM_001161574	MAFF	7.62821e-09	12.9318	0	protein_coding
NM_000720	CACNA1D	1.4784e-09	12.9229	0	protein_coding
NM_001271780	PSMD6	3.82984e-13	12.8985	0	protein_coding
NM_182683	UPK3B	5.56499e-09	12.8935	0	protein_coding
NM_004113	FGF12	6.0338e-10	12.8788	0	protein_coding
NM_001256313	STK3	7.17184e-09	12.8741	0	protein_coding
NM_001160302	SYNJ1	1.08044e-20	12.8667	0	protein_coding
NM_198538	SBSN	1.55059e-12	12.854	0	protein_coding
NM_001102654	NTF3	4.20678e-09	12.8482	0	protein_coding
NM_001265614	SLC25A25	1.06722e-08	12.8465	0	protein_coding
NM_001204267	GABRA4	3.95471e-10	12.8458	0	protein_coding
NM_173494	PIH1D3	8.16116e-10	12.8445	0	protein_coding
NM_001127328	ACADM	4.12528e-09	12.8428	0	protein_coding
NR_024370	LOC440356	5.73974e-09	12.835	0	processed_transcript
NM_001197301	DKKL1	2.23487e-09	12.8291	0	protein_coding
NM_001144972	SNX20	5.53437e-10	12.8268	0	protein_coding
NR_026787	LMLN	9.62231e-10	12.8268	0	protein_coding
NM_001130860	HEPH	5.55866e-09	12.8255	0	protein_coding
NM_001205251	ACSL6	1.35321e-09	12.8128	0	protein_coding
NM_153620	HOXA1	5.63048e-09	12.8013	0	protein_coding
NM_178273	PILRA	2.71625e-09	12.7935	0	protein_coding
NM_001145861	POP1	2.34167e-08	12.7874	0.488785	protein_coding
NM_001165966	PITPNM3	5.23623e-09	12.7834	0	protein_coding
NM_024993	LRRTM4	7.08738e-10	12.7818	0	protein_coding
NM_001193389	UNKL	1.28812e-08	12.7791	0	protein_coding
NM_001160708	POLR3B	7.46328e-09	12.7788	0	protein_coding
NM_002082	GRK6	8.99344e-09	12.7787	0	protein_coding
NM_001199786	FKBP1A	8.59968e-08	12.7744	0.792366	protein_coding
NM_002662	PLD1	1.11903e-08	12.768	0	protein_coding
NM_001130922	RABL2B	2.17397e-08	12.7606	0	protein_coding
NM_001754	RUNX1	1.46166e-09	12.755	0	protein_coding
NM_001166349	SLC26A11	3.40132e-09	12.7439	0	protein_coding
NM_001040182	CLDND1	7.21389e-08	12.7403	1.59688	protein_coding
NR_073544	AXDND1	4.71757e-09	12.7393	0	nonsense_mediated_decay
NM_005414	SKIL	2.20948e-08	12.7358	0	protein_coding
NR_046072	NKX3-1	5.7303e-12	12.734	0	unannotated_transcripts
NR_037791	RAB4B-EGLN2	2.3147e-09	12.7291	0	nonsense_mediated_decay
NM_201636	TBXA2R	1.81066e-09	12.7112	0	protein_coding
NM_030794	TDRD3	2.11153e-09	12.6864	0	protein_coding
NM_000283	PDE6B	1.90464e-10	12.6667	0	protein_coding
NR_073510	ONECUT1	1.06478e-09	12.6568	0	unannotated_transcripts
NM_031468	CALN1	5.38705e-10	12.648	0	protein_coding
NM_001163636	GTF2I	1.07474e-08	12.647	0	protein_coding
NM_001033082	MYCL1	9.48815e-09	12.6395	0	protein_coding
NM_198569	GPR126	1.02727e-07	12.6325	0.574955	protein_coding
NR_072983	DOLPP1	2.29417e-08	12.6314	0	nonsense_mediated_decay
NM_001193340	SLC13A3	3.62182e-12	12.6138	0	protein_coding
NM_001185062	AQP1	3.01776e-09	12.6123	0	unannotated_transcripts
NM_001145291	PDE6B	1.98567e-10	12.612	0	protein_coding
NM_001126112	TP53	1.69611e-08	12.6025	0	protein_coding
NM_178445	CCRL1	4.34074e-09	12.5787	0	protein_coding
NM_001276342	C18orf8	4.53738e-09	12.5587	0	protein_coding
NM_001270476	PPP2R5D	1.12581e-08	12.5547	0	protein_coding
NM_001077262	UBXN11	1.69739e-08	12.5496	0	protein_coding
NM_001007024	GOSR1	2.90634e-08	12.5403	1.68298	protein_coding
NM_001130851	CDKN3	2.19159e-08	12.5344	0	protein_coding
NM_001261442	EXTL2	4.9307e-09	12.5314	0	protein_coding
NM_001122827	ESRP1	5.9906e-08	12.5245	0.424004	protein_coding
NM_001265611	MAPKBP1	6.59355e-09	12.5223	0	protein_coding
NM_001033574	AMZ2	6.53602e-08	12.5216	0.708964	protein_coding
NM_001136217	TMEM51	1.0386e-07	12.5144	0.600672	protein_coding
NM_031205	CABP1	2.91452e-09	12.5117	0	protein_coding
NR_037174_5	LOC100507463	1.80741e-09	12.5099	0	unannotated_transcripts
NM_016826	OGG1	2.03296e-08	12.5065	0	protein_coding
NM_001039659	IL18BP	9.5892e-28	12.4911	0	protein_coding
NM_013953	PAX8	8.39174e-09	12.4908	0	protein_coding
NM_001170717	BCAR1	2.84992e-08	12.4788	0.598599	protein_coding
NM_001164459	ACTR3C	7.07447e-13	12.4722	0	protein_coding
NM_001042453	MST4	8.03939e-09	12.4611	0	protein_coding
NM_015979	MED23	1.39417e-08	12.4427	0	protein_coding
NM_018155	SLC25A36	3.92233e-08	12.4415	0.832387	protein_coding
NR_046255	FGD5-AS1	8.07805e-08	12.4289	0.671722	lncRNA
NM_001199290	PHOSPHO2-KLHL23	1.82423e-08	12.4204	0	protein_coding
NM_001243730	RARG	2.35102e-08	12.4182	0	protein_coding
NM_148898	FOXP2	1.22654e-12	12.4152	0	protein_coding
NM_001271662	SEMA4F	2.83749e-08	12.4033	0	protein_coding
NM_001083947	TMPRSS4	1.05294e-08	12.3873	0	protein_coding
NM_182314	ENOX2	7.87258e-09	12.3831	0	protein_coding
NM_001248007	TRIM3	5.85058e-09	12.3754	0	protein_coding
NR_040006	CLPTM1	6.40587e-09	12.3716	0	unannotated_transcripts
NM_003990	PAX2	5.13431e-09	12.3706	0	protein_coding
NR_073366	DNAJC10	5.11745e-09	12.3577	0	retained_intron
NM_015209	KAZN	2.58582e-09	12.3509	0	protein_coding
NR_046313	CHRNA3	2.17267e-09	12.3504	0	nonsense_mediated_decay
NM_133168	OSCAR	2.65573e-09	12.3485	0	protein_coding
NR_027299	XPC	4.57991e-08	12.3466	1.67264	unannotated_transcripts
NM_001198611	MAP7	4.93137e-09	12.3451	0	protein_coding
NR_026661	FAM222A-AS1	1.33193e-08	12.3447	0	lncRNA
NR_028075	SCARF1	9.0377e-12	12.3338	0	nonsense_mediated_decay
NM_152320	ZNF641	5.51184e-09	12.3324	0	protein_coding
NM_002017	FLI1	3.84658e-10	12.332	0	protein_coding
NM_004734	DCLK1	2.37068e-25	12.3301	0	protein_coding
NM_001004426	PLA2G6	7.04631e-09	12.3225	0	protein_coding
NM_001243784	PDE2A	2.87128e-08	12.3207	0	protein_coding
NM_001174151	ARL13B	2.5531e-08	12.3203	0	protein_coding
NM_031862	NBR1	1.11104e-08	12.305	0	protein_coding
NM_001122671	CCBL1	2.19413e-08	12.2923	0	protein_coding
NM_013406	DHPS	9.06427e-09	12.2923	0	protein_coding
NM_001142415	AIMP1	9.67806e-09	12.282	0	protein_coding
NR_073449	REEP2	8.54947e-09	12.2816	0	protein_coding
NR_046409	POLD3	6.16129e-09	12.2734	0	protein_coding
NM_001199809	INTS7	6.82327e-09	12.2691	0	protein_coding
NR_024581	ASB13	7.43282e-08	12.2634	0.445935	processed_transcript
NM_001270699	ARHGAP12	2.72838e-08	12.2594	0	protein_coding
NR_073377	TPRA1	4.07877e-08	12.2569	0.845576	nonsense_mediated_decay
NR_045218	TRIM41	1.7959e-08	12.2401	0	nonsense_mediated_decay
NM_000841	GRM4	7.904e-09	12.2355	0	protein_coding
NM_001242826	RNF41	8.26575e-09	12.2272	0	protein_coding
NM_001258028	TKT	9.93025e-09	12.2184	0	protein_coding
NM_001127605	LIPA	8.9417e-09	12.2138	0	protein_coding
NM_003466	PAX8	5.80941e-08	12.2088	1.44672	protein_coding
NM_001025237	TSPAN4	7.76932e-14	12.2088	0	protein_coding
NM_001272042	RPS6KB1	1.26562e-08	12.2017	0	protein_coding
NM_001276457	ELF2	1.02846e-07	12.1822	0.598686	protein_coding
NM_199004	ARRB2	1.5047e-08	12.1577	0	protein_coding
NM_001099339	COMMD7	5.33708e-08	12.1459	0.802857	protein_coding
NM_001197221	PDE4D	3.87408e-09	12.136	0	protein_coding
NM_001166359	SHMT2	1.23829e-08	12.132	0	protein_coding
NM_001129728	PLEKHG4	6.13198e-08	12.1059	1.22805	protein_coding
NM_001184789	PARD3	3.05474e-14	12.1012	0	protein_coding
NM_001082487	ACD	5.77817e-09	12.0919	0	unannotated_transcripts
NM_152283	ZFP62	7.24786e-08	12.0862	1.44977	protein_coding
NM_001130970	NSMF	1.22257e-08	12.075	0	protein_coding
NM_001014451	DDX19B	1.61924e-08	12.0737	0	protein_coding
NM_001171095	CLDN2	1.34686e-09	12.0735	0	protein_coding
NM_001166057	PEPD	8.273e-09	12.0656	0	protein_coding
NM_198953	NUDT1	5.15554e-08	12.0648	0.563678	protein_coding
NM_001244889	UNC5B	6.69384e-08	12.0646	0.946154	protein_coding
NR_073401	FBXL19	1.08583e-07	12.0583	1.2652	unannotated_transcripts
NM_001258464	PAX6	3.0085e-10	12.0582	0	protein_coding
NM_001001349	NKIRAS2	2.37776e-08	12.0535	0	protein_coding
NM_024054	C7orf25	1.38178e-07	12.0331	0.653256	protein_coding
NR_045773	ATF2	3.6056e-08	12.0311	0	protein_coding
NM_031849	PCDHA6	6.50508e-44	12.0241	0	protein_coding
NM_020985	CHAT	2.00409e-09	12.009	0	protein_coding
NM_001197320	MCL1	4.68784e-08	12.0037	0.838482	protein_coding
NM_203473	PORCN	1.02775e-12	12.0002	0	protein_coding
NM_001271781	PSMD6	1.17484e-07	11.9935	0.380176	protein_coding
NM_002505	NFYA	3.31416e-08	11.9919	0	protein_coding
NM_001173990	TMEM216	7.71555e-08	11.9881	0.614841	protein_coding
NM_001256738	GDAP1L1	1.23672e-11	11.9668	0	protein_coding
NM_004442	EPHB2	1.34111e-07	11.9614	0.584776	protein_coding
NM_001142623	GHDC	1.91887e-08	11.9553	0	protein_coding
NM_005363	MAGEA6	1.35479e-09	11.9545	0	protein_coding
NM_001135176	NEDD1	3.55941e-08	11.947	0	protein_coding
NM_001017957	OS9	1.28081e-11	11.9337	0	protein_coding
NM_018565	SERINC2	1.6774e-08	11.9293	0	protein_coding
NM_032831	ORAI2	2.23797e-08	11.9288	0	protein_coding
NM_177529	SULT1A1	1.04765e-08	11.9282	0	protein_coding
NM_001002843	ZNF280D	2.96555e-08	11.9259	0	protein_coding
NR_003529	CDKN2B-AS1	2.74975e-09	11.9204	0	lncRNA
NM_001257331	ARRB2	2.82962e-09	11.888	0	protein_coding
NM_001166135	RBM28	2.5059e-08	11.8868	0	protein_coding
NM_001160210	SLC25A13	5.50817e-08	11.8607	0.603888	protein_coding
NM_001243776	CEP57	1.94085e-08	11.8495	0	protein_coding
NM_001014988	LAT	1.0415e-08	11.8421	0	protein_coding
NM_001261385	UEVLD	3.82401e-12	11.8362	0	protein_coding
NM_032123	KIRREL2	8.67341e-09	11.8315	0	protein_coding
NM_001193301	SEMA4A	5.05296e-09	11.8307	0	protein_coding
NM_001199673	CALU	2.71424e-08	11.8304	0	protein_coding
NM_016084	RASD1	3.47093e-08	11.8067	0	protein_coding
NR_028462	ATXN3	2.18305e-08	11.8049	0	nonsense_mediated_decay
NR_029467	SELL	8.98604e-09	11.7989	0	protein_coding
NM_152780	MAP7D2	1.30368e-13	11.7853	0	protein_coding
NM_019084	CCNJ	7.59242e-08	11.774	0.570328	protein_coding
NM_138320	PCSK6	9.73041e-09	11.7698	0	unannotated_transcripts
NM_001242402	GHR	9.63894e-14	11.7595	0	protein_coding
NM_001146696	KDM4C	7.48896e-09	11.7546	0	protein_coding
NM_001252093	MRAS	1.22339e-08	11.7541	0	protein_coding
NM_001172684	CELF6	1.33209e-09	11.7513	0	protein_coding
NM_001256068	NOXA1	2.46473e-08	11.7462	0	protein_coding
NR_040712	CHRAC1	3.63666e-08	11.7377	0	unannotated_transcripts
NM_016569	TBX3	3.67884e-08	11.7308	0	protein_coding
NM_001171991	HCCS	6.41195e-09	11.7257	0	protein_coding
NM_020485	RHCE	8.56967e-09	11.707	0	protein_coding
NM_001256412	RAB18	1.85938e-10	11.6997	0	protein_coding
NM_001161659	MYB	1.22752e-08	11.6713	0	protein_coding
NM_001201404	WASF2	4.53209e-08	11.648	0	protein_coding
NM_001172438	PEG10	3.6384e-08	11.6323	0	protein_coding
NM_001256909	CYBRD1	1.60449e-08	11.624	0	protein_coding
NM_001010986	ATP11C	1.47074e-07	11.6239	0.596965	protein_coding
NM_001173551	TMPRSS4	1.23699e-08	11.62	0	protein_coding
NM_001267605	ZNF248	6.41978e-22	11.5992	0	protein_coding
NM_001199201	ZBBX	1.05052e-08	11.5929	0	protein_coding
NM_032264	NBPF3	3.60819e-08	11.5872	0	protein_coding
NM_001145819	SOX6	1.16415e-10	11.5771	0	protein_coding
NM_001260488	ZNF155	1.31261e-16	11.5767	0	protein_coding
NM_006647	NOXA1	2.25767e-11	11.5756	0	protein_coding
NM_001166418	HDAC8	5.55655e-08	11.5731	0.564793	protein_coding
NM_001242598	TMEM147	2.28769e-08	11.5548	0	protein_coding
NM_133177	PTPRU	1.07792e-08	11.5442	0	protein_coding
NM_002891	RASGRF1	7.80201e-11	11.531	0	protein_coding
NR_075098	HEATR2	3.55108e-08	11.5297	0	protein_coding
NM_003987	PAX2	7.53452e-09	11.5272	0	protein_coding
NM_015846	MBD1	3.3385e-14	11.5271	0	protein_coding
NM_001130928	MEF2A	1.12553e-08	11.5192	0	protein_coding
NM_005550	KIFC3	2.16864e-08	11.5147	0	protein_coding
NM_001256187	SNX12	1.80537e-08	11.5128	0	protein_coding
NM_001040197	AGTRAP	6.08164e-08	11.4994	0.900492	protein_coding
NR_028500	LDHA	3.22396e-08	11.497	0	nonsense_mediated_decay
NM_001136215	ARTN	2.41853e-08	11.4963	0	protein_coding
NM_002599	PDE2A	2.36423e-15	11.493	0	protein_coding
NM_001146207	RASGRP4	2.03475e-09	11.4866	0	protein_coding
NR_036476	TMEM198B	5.88524e-08	11.484	0.363612	processed_transcript
NM_001042750	STAG2	4.43627e-09	11.4712	0	protein_coding
NM_001199264	SGK2	9.6244e-10	11.4669	0	protein_coding
NM_001178032	ZC4H2	3.24248e-08	11.4666	0	protein_coding
NM_018918	PCDHGA5	1.76925e-20	11.4512	0	protein_coding
NM_018926	PCDHGB6	3.31368e-16	11.4445	0	protein_coding
NM_080631	VPS41	7.25129e-09	11.443	0	protein_coding
NM_001190821	SMAD7	8.99458e-08	11.442	0.654038	protein_coding
NM_001252197	IRX5	3.30619e-09	11.4367	0	protein_coding
NM_001204414	TINAGL1	4.84096e-08	11.4277	0	protein_coding
NM_001193267	SIRT5	1.34801e-08	11.4006	0	protein_coding
NM_001135590	ZNF577	2.59716e-08	11.3989	0	protein_coding
NM_001185127	VAMP4	5.09554e-08	11.3866	0	protein_coding
NM_152872	FAS	4.77445e-08	11.3851	0	protein_coding
NM_001198786	POU2F1	6.59595e-08	11.3646	0.73743	protein_coding
NM_001100603	KDELR2	8.06717e-09	11.3638	0	protein_coding
NM_001167607	GM2A	9.83712e-09	11.3612	0	protein_coding
NM_001097639	FUT3	3.57703e-08	11.3612	0	protein_coding
NM_001256728	USP39	2.02997e-08	11.3604	0	protein_coding
NM_001204415	TINAGL1	1.43867e-07	11.3579	1.52506	protein_coding
NM_001146282	SRP54	2.27211e-08	11.3528	0	protein_coding
NM_002341_5	LTB	3.39836e-08	11.3287	0	unannotated_transcripts
NM_001145152	VPS37A	2.3889e-08	11.3255	0	protein_coding
NM_001604	PAX6	5.64075e-11	11.3134	0	protein_coding
NM_001042410	ANKZF1	1.28834e-07	11.3013	0.546758	protein_coding
NM_001199817	GGCT	2.31598e-08	11.2928	0	protein_coding
NR_073505	ESR2	1.52511e-08	11.2894	0	unannotated_transcripts
NM_057091	ARTN	1.19814e-07	11.2879	0.905005	protein_coding
NM_004827	ABCG2	2.01077e-08	11.2851	0	protein_coding
NM_006549	CAMKK2	3.52736e-22	11.284	0	protein_coding
NM_001204220	ZNF670	9.62745e-08	11.2781	0.640259	protein_coding
NM_001005388	NFASC	1.16719e-08	11.275	0	protein_coding
NM_032871	RELT	4.59801e-08	11.2702	0	protein_coding
NM_001168375	KIAA0319	2.43274e-08	11.2549	0	protein_coding
NM_001190822	SMAD7	1.22682e-07	11.2437	0.642828	protein_coding
NM_198926	FAM212B	2.88492e-08	11.2417	0	protein_coding
NM_178497	C4orf26	3.96663e-09	11.231	0	protein_coding
NM_001014444	CRYM	9.99114e-09	11.2163	0	unannotated_transcripts
NM_001171088	CLCN2	3.14289e-08	11.2136	0	protein_coding
NM_001199880	EGR3	7.76421e-09	11.2136	0	protein_coding
NM_001270880	GNPDA2	3.87932e-12	11.1984	0	protein_coding
NM_001242307	PITRM1	4.70548e-08	11.179	0	protein_coding
NM_001542	IGSF3	4.30445e-08	11.1771	0	protein_coding
NM_001184808	CD99L2	8.18074e-09	11.1648	0	protein_coding
NM_001101653	COMMD9	1.14696e-08	11.1644	0	protein_coding
NM_001258433	NDRG1	2.84834e-08	11.1572	0	protein_coding
NR_024222	KBTBD4	7.83958e-08	11.1542	1.14297	unannotated_transcripts
NM_001172517	SATB2	4.85463e-10	11.1416	0	protein_coding
NM_014809	KIAA0319	3.35603e-09	11.1373	0	protein_coding
NM_001243965	HLA-DRB1	7.38448e-08	11.1324	0.921724	protein_coding
NM_001012516	ITM2C	1.459e-08	11.132	0	protein_coding
NR_046479	FKBP14	1.04044e-08	11.1319	0	protein_coding
NM_001005362	DNM2	6.29422e-08	11.1243	0	protein_coding
NM_001206880	MRVI1	5.40705e-18	11.1215	0	protein_coding
NM_145259	ACVR1C	1.0621e-08	11.1087	0	protein_coding
NR_033227	CHTF8	4.45507e-07	11.0975	0.843148	unannotated_transcripts
NR_033955	P2RX7	4.21088e-13	11.0971	0	protein_coding
NM_153499	CAMKK2	2.74623e-21	11.0929	0	protein_coding
NM_001145293	NGLY1	5.2904e-08	11.0887	0	protein_coding
NM_013956	NRG1	7.83417e-14	11.0739	0	protein_coding
NM_001170704	MBNL3	8.64973e-15	11.0716	0	protein_coding
NM_001166017	SKA3	1.75233e-07	11.0532	1.16273	protein_coding
NM_199248	CACNB1	6.78755e-08	11.0443	0	protein_coding
NM_001003943	BMF	3.74295e-08	11.0431	0	protein_coding
NM_172214	CAMKK2	4.13123e-13	11.0379	0	protein_coding
NR_036639	YIPF1	3.91719e-08	11.0339	0	protein_coding
NM_001144886	CITED1	1.23888e-08	11.0324	0	protein_coding
NM_001257396	UBE2V1	1.0382e-11	11.0229	0	protein_coding
NM_198704	HSD11B1L	1.95263e-08	11.0088	0	protein_coding
NM_002552	ORC4	1.12753e-07	11.0032	0.712198	protein_coding
NM_139071	SMARCD1	4.73733e-08	10.9973	0	protein_coding
NR_024384	LINC00461	5.78246e-09	10.9964	0	lncRNA
NM_001142929	CHAT	2.9621e-12	10.9876	0	protein_coding
NM_182676	PLTP	1.0656e-45	10.9831	0	protein_coding
NM_001204062	COMMD3-BMI1	2.08868e-08	10.9807	0	protein_coding
NM_001198674	TMEM136	1.04286e-08	10.9797	0	protein_coding
NM_001161010	ARMC10	3.59404e-07	10.9554	0.603801	protein_coding
NR_026939	CASC2	3.50615e-08	10.9535	0	lncRNA
NM_018272	CASC1	3.01346e-10	10.9481	0	protein_coding
NM_001145666	GLG1	7.2553e-08	10.9436	0	protein_coding
NM_001256092	ATF2	1.6024e-07	10.9394	0.394695	protein_coding
NM_001170687	MIB2	6.55701e-08	10.933	0	protein_coding
NM_001174094	ZEB1	2.52106e-08	10.9188	0	protein_coding
NM_001271698	ABCB7	1.13709e-13	10.9031	0	protein_coding
NM_001206609	SELPLG	4.2503e-08	10.9011	0	protein_coding
NM_000826	GRIA2	7.43938e-10	10.8981	0	protein_coding
NM_001083619	GRIA2	7.43938e-10	10.8981	0	protein_coding
NM_001199157	KAT7	9.30591e-10	10.8977	0	protein_coding
NM_001195532	SPTAN1	1.39646e-07	10.8947	0.533355	protein_coding
NM_032468	ASPH	9.04136e-23	10.8886	0	protein_coding
NM_001173466	AAAS	4.26106e-08	10.8691	0	protein_coding
NM_001271573	PEX11A	1.49264e-07	10.8676	0.605899	protein_coding
NM_001204889	ALDH2	2.01536e-08	10.863	0	protein_coding
NM_015233	MTUS2	8.60575e-10	10.8574	0	protein_coding
NM_178173	CCDC36	3.31451e-09	10.8538	0	protein_coding
NM_001170931	FOXO4	5.41859e-09	10.853	0	protein_coding
NM_001144881	PRICKLE1	1.00907e-08	10.8389	0	protein_coding
NR_026554	CALCOCO1	3.4246e-08	10.8324	0	protein_coding
NM_138819	FAM122C	6.04035e-08	10.8278	0	protein_coding
NR_003605	ZFAS1	1.32584e-07	10.8266	0.648107	lncRNA
NR_073069	BCL2L13	3.86209e-25	10.8135	0	unannotated_transcripts
NM_080423	PTPN2	3.00418e-08	10.8124	0	protein_coding
NM_001174105	CD14	1.08559e-08	10.812	0	protein_coding
NM_153432	ODF2	4.28271e-14	10.7896	0	protein_coding
NM_138469	R3HCC1L	1.36395e-07	10.7829	1.21968	protein_coding
NM_001172623	NEO1	6.54588e-08	10.7799	0	protein_coding
NR_036641	PDGFC	6.43929e-08	10.7508	0	nonsense_mediated_decay
NM_001258450	PKMYT1	2.26701e-08	10.749	0	protein_coding
NM_001164501	EIF4ENIF1	2.20667e-08	10.7485	0	protein_coding
NM_001018075	NR3C1	9.97772e-13	10.7458	0	protein_coding
NM_001170716	BCAR1	1.97572e-11	10.7442	0	protein_coding
NM_001005368	ZNF32	6.24192e-08	10.7383	0	protein_coding
NM_001145256	IRAK4	3.74346e-08	10.7281	0	protein_coding
NM_001130716	PLAC8	8.03394e-11	10.7105	0	protein_coding
NM_152494	DCST1	5.61665e-12	10.7044	0	protein_coding
NM_001190977	YAF2	7.56811e-08	10.6966	0	protein_coding
NM_001039574	KCNC4	4.09992e-08	10.6907	0	protein_coding
NM_001190919	THRA	1.4054e-15	10.6668	0	protein_coding
NM_000083	CLCN1	1.55517e-08	10.6374	0	protein_coding
NM_001195217	CCDC107	1.23562e-07	10.6193	0.590574	protein_coding
NM_001167614	LEMD3	1.34608e-07	10.6166	0.591421	protein_coding
NM_001171797	TRIQK	1.39295e-07	10.614	1.17881	protein_coding
NM_001256064	CNTN1	2.39498e-12	10.5999	0	protein_coding
NM_001253881	MED27	6.15685e-07	10.5986	1.03152	protein_coding
NM_198378	CACNA1G	8.70999e-19	10.5891	0	protein_coding
NM_198901	SRI	4.84634e-08	10.5885	0	protein_coding
NM_001083608	NARF	5.02222e-08	10.5868	0	protein_coding
NM_001243241	ZSCAN31	1.00315e-09	10.5771	0	protein_coding
NM_175738	RAB37	5.81394e-19	10.5749	0	protein_coding
NM_001040280	CD83	3.68714e-07	10.5747	0.614841	protein_coding
NM_006463	STAMBP	2.00602e-08	10.5744	0	protein_coding
NM_001256668	FAM193A	3.27132e-08	10.5743	0	protein_coding
NM_001198619	MAP7	1.05035e-11	10.5663	0	protein_coding
NR_036493	PEX19	1.63379e-07	10.5627	0.614483	nonsense_mediated_decay
NR_027941	COX11	1.15818e-07	10.5597	0.49812	nonsense_mediated_decay
NM_001255976	PMEPA1	1.29968e-08	10.5554	0	protein_coding
NM_001145056	SLC44A2	1.08268e-07	10.5513	0.611721	protein_coding
NR_024568	FBXO31	1.96449e-08	10.5498	0	unannotated_transcripts
NM_001172691	ZNF573	3.29614e-08	10.5492	0	protein_coding
NM_001001996	GPM6B	3.88516e-12	10.5447	0	protein_coding
NR_047694	PIGT	1.53562e-07	10.5423	0.487916	nonsense_mediated_decay
NR_028458	ATXN3	5.79699e-13	10.5208	0	nonsense_mediated_decay
NM_006994	BTN3A3	3.2483e-08	10.5203	0	protein_coding
NR_024144	GHRLOS	1.10151e-21	10.5144	0	lncRNA
NM_001134430	TOR2A	4.7412e-08	10.497	0	protein_coding
NR_028588	ECI2	8.88612e-13	10.4963	0	nonsense_mediated_decay
NM_001172666	RAB40C	5.82543e-10	10.4915	0	protein_coding
NM_138786	TM4SF18	1.35915e-08	10.4891	0	protein_coding
NM_181775	PLXNA4	2.61571e-09	10.4733	0	protein_coding
NM_001127898	CLCN5	4.11323e-08	10.4577	0	protein_coding
NM_001172767	FOXP2	1.36409e-11	10.4566	0	protein_coding
NM_183232	IKZF3	2.95599e-12	10.4556	0	protein_coding
NM_001267822	ZMYND15	2.33933e-10	10.4535	0	protein_coding
NM_177434	FTSJ1	5.02594e-08	10.4414	0	unannotated_transcripts
NM_001160	APAF1	1.54879e-08	10.4288	0	protein_coding
NM_001184697	MEPE	9.82327e-18	10.4259	0	protein_coding
NM_001198615	MAP7	1.52763e-11	10.4232	0	protein_coding
NM_001018070	CORO1B	1.55389e-07	10.3827	0.662541	protein_coding
NM_001204519	P2RX5	6.69066e-11	10.3772	0	protein_coding
NM_001024613	FEZF1	4.22072e-09	10.3705	0	protein_coding
NM_013964	NRG1	1.71527e-13	10.3532	0	protein_coding
NM_001164165	GPR75-ASB3	1.84838e-12	10.3483	0	protein_coding
NM_001142550	WDR47	4.74704e-08	10.347	0	protein_coding
NR_026973_4	HLA-F-AS1	3.36755e-09	10.3468	0	unannotated_transcripts
NM_001159291	MICAL1	8.87628e-08	10.3467	0	protein_coding
NM_001256478	CMPK2	1.26582e-08	10.3383	0	protein_coding
NM_016729	FOLR1	2.09372e-07	10.337	0.816019	protein_coding
NM_001142446	ANK1	2.35068e-15	10.3362	0	protein_coding
NM_015079	TBC1D2B	4.49204e-08	10.3271	0	protein_coding
NM_001165418	SLC25A11	1.51056e-08	10.3245	0	protein_coding
NM_001102454	ZNF219	1.54224e-07	10.3145	0.392652	protein_coding
NM_203475	PORCN	6.14931e-08	10.3095	0	protein_coding
NM_001130103	COL13A1	3.28078e-08	10.3076	0	protein_coding
NM_182471	PKM	1.0598e-06	10.301	0.470505	protein_coding
NM_001422	ELF5	9.07228e-09	10.2876	0	protein_coding
NM_003706	PLA2G4C	2.19984e-07	10.2873	0.639123	protein_coding
NM_001242548	ANAPC16	1.56951e-08	10.2847	0	protein_coding
NM_001256702	USP3	4.67629e-08	10.2732	0	protein_coding
NM_001142431	MORF4L2	5.71842e-17	10.2627	0	protein_coding
NM_025249	KIAA1683	3.93263e-08	10.2333	0	protein_coding
NM_020775	KIAA1324	1.16227e-08	10.2201	0	protein_coding
NM_080591	PTGS1	4.07012e-08	10.2184	0	protein_coding
NM_001077194	GPBAR1	5.32125e-09	10.209	0	protein_coding
NM_000770	CYP2C8	4.16968e-09	10.2078	0	protein_coding
NM_001167990	PQBP1	4.962e-12	10.1949	0	protein_coding
NM_001134194	ACPP	1.70411e-08	10.1932	0	protein_coding
NM_130471	MADD	5.2181e-13	10.1921	0	protein_coding
NM_001242923	EIF3L	1.62624e-07	10.1917	0.487983	protein_coding
NM_001257395	UBE2V1	1.52929e-12	10.1906	0	protein_coding
NM_033290	MID1	1.47533e-20	10.1826	0	protein_coding
NM_016499	TMEM216	1.97109e-07	10.1796	0.510042	protein_coding
NM_001271165	PTGS1	3.68782e-08	10.1788	0	protein_coding
NM_001143771	ZNF438	3.71108e-08	10.172	0	protein_coding
NM_017743	DPP8	1.50569e-07	10.1634	0.553308	protein_coding
NM_001198827	C8orf58	1.99933e-07	10.157	0.575445	protein_coding
NM_001042412	CYLD	1.61256e-07	10.1494	0.53062	protein_coding
NR_047571	ANKFY1	7.43326e-08	10.1451	0	protein_coding
NM_001144940	VMO1	1.40634e-08	10.1389	0	protein_coding
NM_031467	SLC4A9	1.34888e-10	10.1131	0	protein_coding
NM_002140	HNRNPK	1.49619e-07	10.1041	0.560273	protein_coding
NM_001006682	SPIN2B	6.84556e-09	10.1027	0	protein_coding
NM_018921	PCDHGA9	6.2576e-16	10.0935	0	protein_coding
NM_001256680	KIAA0391	3.85173e-07	10.0739	1.12033	protein_coding
NM_001166266	LTBP1	1.37462e-08	10.0628	0	protein_coding
NM_014839	LPPR4	1.8465e-08	10.0566	0	protein_coding
NM_057166	COL6A3	1.11943e-08	10.0499	0	protein_coding
NM_001242918	ZFAND6	9.5825e-21	10.0319	0	protein_coding
NR_045622	NABP1	3.30099e-07	10.0143	0.866621	nonsense_mediated_decay
NM_001130042	CRYZ	1.63114e-13	10.0032	0	protein_coding
NR_027668	RNF170	6.25224e-08	9.99882	0	nonsense_mediated_decay
NM_001130002	C3orf55	1.19205e-08	9.99851	0	processed_transcript
NM_018662	DISC1	9.646e-08	9.9898	0	protein_coding
NR_051952	HDAC8	2.50013e-14	9.97219	0	nonsense_mediated_decay
NR_072987	TMEM254	4.77624e-21	9.96386	0	processed_transcript
NM_001198671	TMEM136	1.23443e-07	9.94769	0	protein_coding
NM_001170587	HHAT	6.24508e-09	9.94153	0	protein_coding
NM_001256047	C19orf12	1.01575e-11	9.9312	0	protein_coding
NM_001204420	RGS6	1.41533e-07	9.92168	0	protein_coding
NM_013957	NRG1	2.75044e-13	9.91895	0	protein_coding
NM_001242401	GHR	9.01479e-14	9.91202	0	protein_coding
NM_198244	EIF4G1	6.49418e-07	9.90796	0.632365	protein_coding
NM_000343	SLC5A1	6.82985e-09	9.89638	0	protein_coding
NM_001199943	SH3GL1	4.45139e-08	9.89466	0	protein_coding
NM_201544	LGALS8	2.26224e-07	9.89027	0.605548	protein_coding
NR_049764	FBXO28	3.2055e-08	9.88617	0	nonsense_mediated_decay
NM_203391	GK	1.45597e-09	9.87702	0	protein_coding
NM_182723	CREM	5.45348e-08	9.87204	0	protein_coding
NM_152408	POC5	1.99554e-08	9.86969	0	protein_coding
NM_004683	RGN	1.72544e-08	9.8628	0	protein_coding
NM_001932	MPP3	8.53494e-08	9.85045	0	protein_coding
NM_001184785	PARD3	1.27897e-10	9.85	0	protein_coding
NM_001167819	FHL1	1.17096e-08	9.84474	0	protein_coding
NM_001172562	INTS9	7.16362e-08	9.8421	0	protein_coding
NM_001173465	KIF21A	1.874e-08	9.83564	0	protein_coding
NM_182531	ZNF778	8.31308e-08	9.83067	0	protein_coding
NM_001001551	IDNK	7.63399e-11	9.83059	0	protein_coding
NM_001198528	TCF7L2	1.1386e-20	9.83019	0	protein_coding
NM_057174	PEX16	6.10887e-09	9.81839	0	protein_coding
NM_001163148	ETV1	1.80009e-08	9.81815	0	protein_coding
NM_001168374	KIAA0319	6.95695e-11	9.81675	0	protein_coding
NR_038951	LOC100506343	7.74694e-14	9.81095	0	lncRNA
NM_001145391	OXSM	1.42657e-07	9.8026	0	protein_coding
NM_001105533	CPED1	2.05333e-08	9.80144	0	protein_coding
NM_001242404	GHR	8.97611e-14	9.79327	0	protein_coding
NM_001032394	GPR126	3.71913e-07	9.79192	0.441712	protein_coding
NM_001025580	AMMECR1	2.13434e-08	9.78069	0	protein_coding
NM_001195822	HSDL2	5.78894e-07	9.77312	0.820448	protein_coding
NM_001242914	ZFAND6	2.52897e-08	9.76671	0	protein_coding
NM_001134367	SLC6A6	2.32125e-07	9.76651	0.485718	protein_coding
NM_001267777	IFT20	1.25323e-08	9.75755	0	protein_coding
NM_207123	GAB1	8.49315e-08	9.75699	0	protein_coding
NM_001111039	ZSCAN26	4.08599e-07	9.75127	0.557207	protein_coding
NM_001244950	SPOCK2	4.46459e-08	9.74524	0	protein_coding
NM_001202403	ASB6	3.26691e-07	9.74074	0.474372	protein_coding
NM_001257965	CRB1	2.74844e-16	9.73524	0	protein_coding
NM_001206946	PICALM	1.23095e-07	9.73292	0	protein_coding
NM_001082538	TCTN1	6.23807e-08	9.71321	0	protein_coding
NR_027683	RPAIN	4.37979e-07	9.71252	0.500932	nonsense_mediated_decay
NM_001162426	TSC1	3.25453e-07	9.71048	0.686449	protein_coding
NM_199039	KLHL5	1.9213e-07	9.68816	0	protein_coding
NM_176797	P2RY6	4.36799e-09	9.67681	0	protein_coding
NM_001203248	EZH2	1.78354e-08	9.6766	0	protein_coding
NM_001173128	YTHDF2	1.23647e-07	9.66396	0	protein_coding
NR_036517	C17orf62	2.40043e-07	9.66108	0.464453	protein_coding
NM_203342	EPB41	6.07144e-08	9.65391	0	protein_coding
NR_033680	CARD8	8.76373e-12	9.65324	0	nonsense_mediated_decay
NM_198833	SERPINB8	4.76436e-07	9.6428	0.601366	protein_coding
NR_072984	TMEM254	2.00629e-25	9.64048	0	processed_transcript
NM_017733	PIGG	2.85323e-07	9.62207	0.556033	protein_coding
NM_001039589	DPH2	1.65711e-08	9.62049	0	protein_coding
NM_001201554	ZNF821	8.06239e-08	9.62001	0	protein_coding
NM_001201473	CORO7	1.85313e-08	9.6125	0	protein_coding
NM_001159588	CD109	1.88712e-07	9.60772	0	protein_coding
NM_001163022	PLK1S1	3.13703e-08	9.6062	0	protein_coding
NM_001193461	MSRB3	1.40899e-07	9.59489	0	protein_coding
NM_016066	GLRX2	3.02589e-12	9.58443	0	protein_coding
NM_001164547	DISC1	9.84749e-29	9.58409	0	protein_coding
NM_001128626	SPIRE1	7.66785e-08	9.56872	0	protein_coding
NM_003277	CLDN5	2.19358e-08	9.56278	0	protein_coding
NM_033302	ADRA1A	1.69772e-08	9.5554	0	protein_coding
NM_004413	DPEP1	2.1285e-08	9.53926	0	protein_coding
NM_018898	PCDHAC1	1.05007e-07	9.53684	0	protein_coding
NM_033641	COL4A6	4.92206e-08	9.53267	0	protein_coding
NM_005090	JMJD7-PLA2G4B	2.39472e-09	9.53227	0	protein_coding
NM_173807	C1orf101	4.26722e-09	9.51863	0	protein_coding
NM_001167962	SLC26A5	1.04792e-13	9.51598	0	protein_coding
NM_033004	NLRP1	1.11953e-07	9.50922	0	protein_coding
NM_001114331	CLCN7	5.22455e-08	9.49955	0	protein_coding
NM_001242399	GHR	8.8802e-14	9.49664	0	protein_coding
NM_001163322	CCDC120	2.12737e-21	9.49138	0	protein_coding
NM_178237	EXOC1	7.9577e-08	9.48745	0	protein_coding
NM_001142525	BHLHB9	2.00504e-16	9.48544	0	protein_coding
NM_001184965	WDR44	2.1695e-07	9.46931	0	protein_coding
NR_073136	HPS4	1.22376e-07	9.44102	0	nonsense_mediated_decay
NM_198445	RINL	1.97564e-07	9.43777	0	protein_coding
NM_004619	TRAF5	3.00759e-07	9.43586	0.623149	protein_coding
NM_145759	TRAF5	3.00759e-07	9.43586	0.616005	protein_coding
NM_152538	IGSF11	2.20491e-08	9.43347	0	protein_coding
NM_001197219	PDE4D	5.45092e-12	9.42963	0	protein_coding
NM_001272043	RPS6KB1	1.7971e-20	9.40815	0	protein_coding
NM_138622	BCL2L11	9.12228e-08	9.4073	0	protein_coding
NM_020208	SLC6A20	3.56242e-08	9.40527	0	protein_coding
NM_001206769	DLG2	3.28594e-14	9.39672	0	protein_coding
NM_001274	CHEK1	2.04329e-07	9.37571	0	protein_coding
NM_000569	FCGR3A	4.93947e-14	9.35248	0	protein_coding
NM_001168335	ME2	7.33258e-08	9.32116	0	protein_coding
NM_170663	MINK1	4.30366e-12	9.311	0	protein_coding
NR_027340	FKBP9L	2.02302e-08	9.30981	0	unannotated_transcripts
NM_001007101	ZNF484	3.45063e-07	9.29373	0.838333	protein_coding
NR_045632	NFU1	1.37366e-07	9.29258	0	processed_transcript
NM_001167681	FLI1	1.76627e-10	9.28755	0	protein_coding
NM_015028	TNIK	3.76686e-08	9.28729	0	protein_coding
NM_001144923	TTC26	4.64962e-11	9.27485	0	protein_coding
NM_001242910	RSPO1	1.03063e-08	9.26749	0	protein_coding
NR_028461	ATXN3	3.78613e-08	9.23713	0	protein_coding
NR_047645	UTY	1.00045e-13	9.23436	0	protein_coding
NM_203329	CD59	1.08715e-07	9.22328	0	protein_coding
NM_012446	SSBP2	5.96926e-08	9.20958	0	protein_coding
NM_001164753	ASPH	1.74764e-25	9.20773	0	protein_coding
NM_001130831	GAS7	4.91034e-08	9.20151	0	protein_coding
NM_001242946	EPDR1	1.84636e-07	9.18728	0	protein_coding
NM_001017425	KCNK2	2.83643e-11	9.18711	0	protein_coding
NM_201998	SF1	9.40949e-08	9.18174	0	protein_coding
NM_001164319	FLNB	3.05257e-07	9.17702	0.631434	protein_coding
NM_202468	GIPC1	6.43813e-07	9.16712	0.525929	protein_coding
NM_001127592	FCGR3A	6.89918e-14	9.16207	0	protein_coding
NM_017829	CECR5	7.24223e-07	9.13976	0.509831	protein_coding
NM_001256749	SSUH2	9.48946e-10	9.12511	0	protein_coding
NM_012153	EHF	2.14087e-06	9.11101	0.65492	protein_coding
NM_001185119	MYNN	2.41037e-07	9.11076	0	protein_coding
NM_000364	TNNT2	1.31762e-10	9.094	0	protein_coding
NR_033703	MYNN	1.00583e-10	9.07953	0	nonsense_mediated_decay
NM_001276464	NR5A2	9.34799e-08	9.06823	0	protein_coding
NR_037962	RHOU	6.47936e-08	9.04687	0	unannotated_transcripts
NR_024520	LMAN2L	5.22016e-08	9.0468	0	unannotated_transcripts
NM_001174081	NLRP2	2.72396e-06	9.03662	0.603278	protein_coding
NM_199330	HOMER2	1.20222e-07	9.03132	0	protein_coding
NM_023085	CAPN10	1.2043e-07	9.02578	0	protein_coding
NM_001172746	SEC23B	1.10489e-07	9.02053	0	protein_coding
NM_001166208	SYNPO	3.36306e-10	9.01279	0	protein_coding
NM_001172420	EFHC1	3.45155e-11	8.99852	0	protein_coding
NM_006333	C1D	3.85583e-07	8.99709	0.597997	protein_coding
NM_001130085	ABLIM2	4.67488e-08	8.97007	0	protein_coding
NM_001178043	DBI	4.45314e-12	8.95953	0	protein_coding
NM_001185073	CLDN12	7.34098e-07	8.92963	0.649268	protein_coding
NM_001178045	SLC44A4	3.38553e-09	8.9216	0	protein_coding
NM_001206944	CSPG5	2.14167e-07	8.91203	0	protein_coding
NM_001202408	ZNF559	1.31788e-09	8.89881	0	protein_coding
NM_001276392	LDLRAD1	2.46169e-08	8.89715	0	protein_coding
NM_145792	MGST1	3.07018e-07	8.89661	0	protein_coding
NM_006007	ZFAND5	2.54215e-07	8.87463	0	protein_coding
NM_001190388	GNE	2.27778e-10	8.85779	0	protein_coding
NM_001243158	TAF1C	6.29887e-08	8.85648	0	protein_coding
NM_001410	MEGF8	2.76146e-07	8.85619	0	protein_coding
NR_027697	TAPT1-AS1	2.0415e-07	8.84713	0	lncRNA
NM_170674	MEIS2	3.94822e-09	8.84253	0	protein_coding
NM_024837	ATP8B4	1.68066e-08	8.84212	0	protein_coding
NM_001207025	POU2F2	1.3019e-07	8.82595	0	protein_coding
NM_001003787	STRADA	1.1723e-07	8.82425	0	protein_coding
NM_001257159	CEP41	1.40168e-07	8.82058	0	protein_coding
NM_177444	PPFIBP1	9.91248e-09	8.81353	0	protein_coding
NM_201536	NDRG2	8.70763e-13	8.80409	0	protein_coding
NM_001025243	IRAK1	7.87728e-07	8.79336	0.71108	protein_coding
NM_001206932_3	AGER	5.4375e-15	8.79016	0	unannotated_transcripts
NM_007078	LDB3	1.42642e-11	8.78993	0	protein_coding
NM_080681_6	COL11A2	1.81083e-07	8.78545	0	unannotated_transcripts
NM_014702	KIAA0408	1.62325e-08	8.77784	0	protein_coding
NM_001130046	CCL20	8.5852e-06	8.75989	0.893979	protein_coding
NM_001256836	QTRTD1	1.36048e-06	8.74558	0.613055	protein_coding
NM_001204184	TP73	1.35523e-10	8.71652	0	protein_coding
NR_046055	CACNA1G	2.03447e-16	8.70695	0	nonsense_mediated_decay
NM_025257_4	SLC44A4	3.98438e-09	8.69502	0	unannotated_transcripts
NM_001168357	PLA2G7	2.09044e-16	8.68293	0	protein_coding
NR_036556	ANKRD54	1.75165e-06	8.68286	0.692397	protein_coding
NM_001511	CXCL1	0.000177557	8.6543	4.30103	protein_coding
NM_001153446	SCOC	4.80514e-09	8.65211	0	protein_coding
NM_001145811	SOX6	8.81373e-11	8.65041	0	protein_coding
NM_000800	FGF1	5.16975e-19	8.64977	0	protein_coding
NM_001178141	TFDP2	4.5223e-07	8.64351	0.49174	protein_coding
NR_037149	NME1-NME2	1.11318e-06	8.64108	0.51435	protein_coding
NM_001242409	GAREM	6.93243e-07	8.63818	0.616095	protein_coding
NM_001077197	PDE11A	2.87548e-11	8.62826	0	protein_coding
NM_181866	ACOT7	8.93037e-07	8.61318	0.533577	protein_coding
NM_052944	SLC5A11	2.48572e-08	8.60687	0	protein_coding
NM_001257963	PDLIM3	1.07577e-18	8.58183	0	protein_coding
NM_001242920	PLTP	1.61945e-39	8.57973	0	protein_coding
NM_018388	MBNL3	1.78398e-13	8.57516	0	protein_coding
NR_052015	RUSC2	2.52291e-07	8.57508	0	protein_coding
NM_001260486	ZNF155	1.60579e-07	8.5698	0	protein_coding
NM_001009991	SYTL3	1.33689e-06	8.56325	0.425911	protein_coding
NM_001202516	CFLAR	1.95573e-07	8.54494	0	protein_coding
NM_032578	MYPN	4.55556e-08	8.53377	0	protein_coding
NM_018925	PCDHGB5	7.90936e-15	8.49759	0	protein_coding
NM_001173479	ARHGEF9	5.00597e-12	8.49209	0	protein_coding
NR_038244	LOC100507557	3.65304e-08	8.48973	0	lncRNA
NM_001191013	GSTO2	2.10261e-07	8.48663	0	protein_coding
NM_001256278	RAB34	2.64423e-08	8.47259	0	protein_coding
NM_001142504	STARD8	1.85206e-12	8.46251	0	protein_coding
NM_001127662	GSN	1.03788e-06	8.42411	0.48142	protein_coding
NM_001136267	DAZAP2	3.74012e-11	8.41478	0	protein_coding
NR_037175_4	LOC100507463	3.215e-08	8.4124	0	unannotated_transcripts
NM_001127715	STXBP5	9.5757e-08	8.40873	0	protein_coding
NM_001168348	NSUN5	7.20784e-08	8.38462	0	protein_coding
NM_000584	IL8	0.000344422	8.37008	4.30103	protein_coding
NR_046057	CACNA1G	6.88066e-08	8.36889	0	nonsense_mediated_decay
NM_001197126	IRF3	1.06217e-07	8.34463	0	protein_coding
NM_020341	PAK7	4.82008e-08	8.33242	0	protein_coding
NM_001267050	GPR155	4.24547e-10	8.32637	0	protein_coding
NM_001164553	DISC1	8.38531e-08	8.32576	0	protein_coding
NM_001256470	PLEKHA5	2.21826e-08	8.32255	0	protein_coding
NM_031448	C19orf12	7.44878e-08	8.32203	0	protein_coding
NM_001161560	TNIK	8.97201e-08	8.32053	0	protein_coding
NM_031369	HNRNPD	3.17609e-06	8.3117	0.460234	protein_coding
NM_001171087	CLCN2	3.95607e-10	8.29807	0	protein_coding
NM_001204110	BCL2L11	3.57454e-16	8.29282	0	nonsense_mediated_decay
NM_176796	P2RY6	1.07274e-11	8.27267	0	protein_coding
NR_027674	ADARB1	7.31582e-13	8.26517	0	nonsense_mediated_decay
NM_001146205	RASGRP4	1.46473e-11	8.2645	0	protein_coding
NM_006203	PDE4D	3.47413e-12	8.24927	0	protein_coding
NM_001254758	ST3GAL4	6.9327e-09	8.2478	0	protein_coding
NM_001204172	MDM4	1.38348e-17	8.24365	0	protein_coding
NM_001251980	RCAN3	3.56973e-12	8.22988	0	protein_coding
NM_080702_6	BAG6	1.05203e-06	8.21475	0.637047	unannotated_transcripts
NM_004802	OTOF	5.98621e-11	8.21439	0	protein_coding
NR_045678	LINC00847	9.51315e-07	8.20255	0.388117	lncRNA
NM_001159380	MTHFSD	9.64025e-10	8.19575	0	protein_coding
NM_001204266	GABRA4	1.22096e-10	8.18568	0	protein_coding
NM_001256608	C1orf85	3.56828e-12	8.1573	0	protein_coding
NM_001114106	SLC44A3	3.58479e-07	8.15647	0	protein_coding
NM_182756	SPDYA	8.31208e-11	8.11995	0	protein_coding
NM_001261443	GNAL	1.06469e-07	8.11806	0	protein_coding
NM_001198942	DTNA	1.63521e-11	8.10637	0	protein_coding
NM_178039	ERC1	1.80333e-08	8.09952	0	protein_coding
NM_024781	CCDC102B	8.73498e-08	8.09739	0	protein_coding
NR_046056	CACNA1G	2.12881e-15	8.09517	0	nonsense_mediated_decay
NM_001204385	VEGFA	1.73617e-13	8.08251	0	protein_coding
NM_001270483	TST	7.97253e-08	8.07819	0	protein_coding
NM_001172128	IL16	3.34371e-11	8.07694	0	protein_coding
NM_001270419	DUS4L	2.34116e-07	8.07085	0	protein_coding
NM_002535	OAS2	1.65664e-10	8.07056	0	protein_coding
NM_001256585	MGLL	1.01997e-06	8.06562	0.710746	protein_coding
NM_001137604	POLR1B	2.36412e-07	8.05315	0	protein_coding
NR_033231	SMPD4	7.90734e-07	8.05145	0.650237	nonsense_mediated_decay
NM_001031726	C19orf12	4.07044e-07	8.04016	0	protein_coding
NM_001145809	MYH14	4.6048e-11	8.0387	0	protein_coding
NM_001184787	PARD3	2.49978e-07	8.0325	0	protein_coding
NM_001167928	IL1RAP	9.71273e-12	8.02955	0	protein_coding
NM_001206981	C4orf26	2.57056e-10	8.02948	0	protein_coding
NR_046008	ZMAT1	3.86529e-10	8.02411	0	unannotated_transcripts
NM_001136574	LANCL1	5.37765e-08	8.00967	0	protein_coding
NM_001267613	GPR161	1.17713e-07	7.995	0	protein_coding
NM_181690	AKT3	1.67063e-11	7.98909	0	protein_coding
NM_001197124	IRF3	2.71329e-13	7.98801	0	protein_coding
NM_001204833	ANO10	8.61565e-08	7.96384	0	protein_coding
NM_174920	SAMD14	1.30113e-10	7.9637	0	protein_coding
NM_002570	PCSK6	2.07305e-07	7.95033	0	protein_coding
NM_153426	PITX2	4.71753e-11	7.931	0	protein_coding
NM_001136041	HDAC11	5.63703e-07	7.92245	0	protein_coding
NM_001544	ICAM4	5.27245e-10	7.90994	0	protein_coding
NM_006497	HIC1	3.37481e-08	7.90538	0	protein_coding
NM_001079691	N4BP2L1	1.21001e-08	7.86478	0	protein_coding
NR_045033	APH1A	1.86342e-06	7.85472	0.632924	protein_coding
NM_001195604	SEPHS1	1.40905e-07	7.85102	0	protein_coding
NM_173073	SLC35C2	4.54136e-07	7.83538	0	protein_coding
NM_000540	RYR1	2.69403e-08	7.81575	0	protein_coding
NM_001184957	C3orf20	9.13753e-12	7.81	0	protein_coding
NM_180976	PPP2R5D	2.20485e-07	7.79641	0	protein_coding
NM_020384	CLDN2	2.30986e-10	7.7954	0	protein_coding
NM_001185177	CES3	2.19069e-07	7.78412	0	protein_coding
NM_004027	INPP4A	7.34797e-08	7.7497	0	protein_coding
NM_001197244	BCL7B	2.12135e-08	7.73793	0	protein_coding
NM_001048222	DBNDD2	5.01614e-08	7.73231	0	protein_coding
NM_005906	MAK	4.42168e-08	7.73082	0	protein_coding
NM_001009939	44079	9.02176e-08	7.73013	0	protein_coding
NR_029416	SHMT2	4.16226e-10	7.71804	0	nonsense_mediated_decay
NM_001261425	PPP1R1C	9.89932e-07	7.70338	0.448306	protein_coding
NM_001127236	GPBP1	1.03802e-14	7.67482	0	protein_coding
NM_001142505	ABCG4	6.7746e-08	7.64604	0	protein_coding
NR_047549	SLC25A12	2.42988e-07	7.64414	0	nonsense_mediated_decay
NM_001146075	RPAP3	7.49452e-07	7.62918	0	protein_coding
NR_074082	TMEM231	4.38758e-07	7.62843	0	unannotated_transcripts
NM_181077	GOLGA8A	5.34808e-09	7.62279	0	protein_coding
NM_018300	ZNF83	2.14874e-06	7.60705	0.383735	protein_coding
NM_001203244	SEMA4G	6.98082e-09	7.6061	0	protein_coding
NM_005446	P2RX6	8.87393e-08	7.58895	0	protein_coding
NM_001242957	MAK	2.8823e-10	7.5727	0	protein_coding
NM_001145396	ALDH16A1	9.34276e-07	7.54059	0.399027	protein_coding
NM_001142389	PNPLA4	5.69928e-07	7.54033	0	protein_coding
NM_001251977	RCAN3	2.48241e-07	7.52663	0	protein_coding
NM_020321	ASIC3	2.24903e-09	7.50671	0	protein_coding
NM_003739	AKR1C3	2.38252e-07	7.50232	0	protein_coding
NM_000163	GHR	8.25726e-14	7.48855	0	protein_coding
NM_001137668	CASP8AP2	5.12436e-07	7.47415	0	protein_coding
NM_178849	HNF4A	3.10719e-07	7.47144	0	protein_coding
NM_001102406	ALPK1	7.98625e-07	7.47028	0	protein_coding
NM_148957	TNFRSF19	1.35058e-11	7.46922	0	protein_coding
NM_001193536	DOCK8	3.81991e-08	7.46742	0	protein_coding
NM_001172567	MYD88	2.87644e-07	7.45246	0	protein_coding
NM_207197	ADAM15	7.69852e-07	7.45111	0	protein_coding
NM_001130047	TBCEL	4.22674e-08	7.43473	0	protein_coding
NM_001167827	TFEB	1.78565e-07	7.42782	0	protein_coding
NM_001164721	PTAFR	2.90693e-07	7.42534	0	protein_coding
NM_001166704	FAM104B	4.78794e-11	7.40837	0	protein_coding
NR_033949	P2RX7	3.77831e-18	7.40792	0	protein_coding
NR_073598	ATP8B4	2.35807e-10	7.40369	0	nonsense_mediated_decay
NM_001005474	NFKBIZ	1.42154e-05	7.38107	0.682459	protein_coding
NM_175080	P2RX5	1.22364e-10	7.37728	0	protein_coding
NM_198089	ZNF155	9.6061e-07	7.35933	0	protein_coding
NM_007248	TREX1	5.97712e-12	7.35575	0	protein_coding
NM_022905	TTC23	2.60102e-09	7.35228	0	unannotated_transcripts
NM_001042762	FIGNL1	5.63051e-06	7.35061	0.647142	protein_coding
NM_001178099	ZNF182	3.54232e-07	7.34646	0	protein_coding
NM_001178035	CEP85L	2.83446e-07	7.33952	0	protein_coding
NM_001258411	SLC5A11	5.1637e-10	7.33071	0	protein_coding
NM_207292	MBNL1	1.35606e-06	7.32193	0.506124	protein_coding
NM_001185072	CLDN12	1.55683e-10	7.31261	0	protein_coding
NM_001083956	ZNF655	1.47501e-06	7.30809	0.374533	protein_coding
NM_001146202	RASGRP4	3.26298e-12	7.29127	0	protein_coding
NM_001127889	SPG21	2.13648e-06	7.2877	0.416971	protein_coding
NM_001194999	MR1	3.80897e-08	7.28277	0	protein_coding
NM_198386	CACNA1G	2.43349e-17	7.28101	0	protein_coding
NM_006051	APBB3	2.65186e-06	7.27298	0.610214	protein_coding
NM_177530	SULT1A1	3.9849e-12	7.26881	0	protein_coding
NM_007162	TFEB	6.50716e-23	7.257	0	protein_coding
NM_144566	ZNF700	8.22662e-06	7.23184	0.7103	protein_coding
NM_001271943	TFEB	8.60386e-07	7.22826	0	protein_coding
NM_020679	MIF4GD	9.38153e-07	7.22102	0	protein_coding
NM_001011513	PDLIM5	5.48151e-12	7.22018	0	protein_coding
NM_001256672	STOML1	1.47773e-11	7.21539	0	protein_coding
NM_001105563_4	CCHCR1	1.66576e-07	7.19981	0	unannotated_transcripts
NM_001242913	ZFAND6	1.10586e-09	7.19914	0	protein_coding
NM_148886	SMCR7	3.39676e-06	7.16117	0.710634	protein_coding
NR_036467	IFFO1	1.96219e-12	7.15892	0	nonsense_mediated_decay
NM_001242843	ZNF195	1.52815e-06	7.13458	0.464326	protein_coding
NM_001257205	FGF1	2.9687e-17	7.11802	0	protein_coding
NM_001712	CEACAM1	8.89901e-18	7.11325	0	protein_coding
NM_174970	ST3GAL3	2.49043e-07	7.11062	0	protein_coding
NM_133169	OSCAR	4.50964e-10	7.10983	0	protein_coding
NM_001243731	RARG	5.50343e-07	7.094	0	protein_coding
NM_001144963	NFKBIL1	1.99735e-06	7.09136	0.563917	protein_coding
NM_181359	IL6R	6.06871e-07	7.08209	0	protein_coding
NM_153380	ZNF41	1.07802e-06	7.07853	0	protein_coding
NM_001257206	FGF1	3.40339e-17	7.06635	0	protein_coding
NR_033427	ARL13B	5.92361e-15	7.02955	0	protein_coding
NM_001202407	ZNF559	1.72172e-09	7.02932	0	protein_coding
NM_001270767	NTAN1	4.71625e-07	7.01302	0	protein_coding
NM_021235	EPS15L1	6.26113e-09	6.99858	0	protein_coding
NM_001159323	PLA2G4C	1.61956e-09	6.98229	0	protein_coding
NM_001242674	AHCYL1	7.29253e-24	6.95819	0	protein_coding
NM_001184696	MEPE	9.00381e-14	6.92866	0	protein_coding
NM_139033	MAPK7	1.12334e-06	6.92345	0	protein_coding
NM_001251901	CD83	6.33761e-05	6.92162	4.30103	protein_coding
NM_001204138	MBD1	9.61769e-15	6.90115	0	protein_coding
NM_001198863	CPNE1	1.64336e-34	6.90048	0	protein_coding
NM_001025369	VEGFA	9.81831e-12	6.89548	0	protein_coding
NM_015029	POP1	1.13012e-07	6.89516	0	protein_coding
NM_033136	FGF1	5.62217e-17	6.87653	0	protein_coding
NR_052024	EIF6	1.98969e-14	6.87483	0	nonsense_mediated_decay
NM_001040630	NCALD	2.05292e-16	6.86871	0	protein_coding
NM_015450	POT1	5.57683e-06	6.86497	0.607743	protein_coding
NM_017527	LY6K	1.8752e-07	6.83917	0	protein_coding
[truncated: 29,256 more rows]

## Sheet: Figure 2 - Source data 1C
Figure 2- source Data 1C. GO enrichment anaylsis for subset of genes represented in the transcripts upregulated > 2 fold upon TRAIL treatment (with 1 hr DMSO pre-treatment). Only statistically significant (FDR < 0.05) enrichments are listed.
Analysis Type:	PANTHER Overrepresentation Test (Released 20210224)
Annotation Version and Release Date:	GO Ontology database DOI: 10.5281/zenodo.4495804 Released 2021-02-01
Analyzed List:	upload_1 (Homo sapiens)
Reference List:	Reference list DMSO.txt (Homo sapiens)	There are duplicate IDs in the file. The unique set of IDs will be used.
Test Type:	FISHER
Correction:	FDR
GO biological process complete	Reference list DMSO.txt - REFLIST (13391)	upload_1 (68)	upload_1 (expected)	upload_1 (over/under)	upload_1 (fold Enrichment)	upload_1 (raw P-value)	upload_1 (FDR)
cellular response to corticotropin-releasing hormone stimulus (GO:0071376)	4	3	0.02	+	> 100	4.26e-06	0.0033
response to corticotropin-releasing hormone (GO:0043435)	4	3	0.02	+	> 100	4.26e-06	0.00313
killing of cells of other organism (GO:0031640)	17	4	0.09	+	46.34	3.34e-06	0.00273
antimicrobial humoral immune response mediated by antimicrobial peptide (GO:0061844)	22	4	0.11	+	35.8	8.19e-06	0.00365
chemokine-mediated signaling pathway (GO:0070098)	23	4	0.12	+	34.25	9.58e-06	0.00403
neutrophil chemotaxis (GO:0030593)	27	4	0.14	+	29.17	1.69e-05	0.00607
cellular response to chemokine (GO:1990869)	29	4	0.15	+	27.16	2.18e-05	0.00699
response to chemokine (GO:1990868)	29	4	0.15	+	27.16	2.18e-05	0.00684
neutrophil migration (GO:1990266)	32	4	0.16	+	24.62	3.11e-05	0.00897
granulocyte chemotaxis (GO:0071621)	33	4	0.17	+	23.87	3.47e-05	0.00964
granulocyte migration (GO:0097530)	38	4	0.19	+	20.73	5.77e-05	0.0133
antimicrobial humoral response (GO:0019730)	40	4	0.2	+	19.69	6.95e-05	0.0155
cell killing (GO:0001906)	44	4	0.22	+	17.9	9.81e-05	0.0198
myeloid leukocyte migration (GO:0097529)	50	4	0.25	+	15.75	0.000156	0.028
leukocyte chemotaxis (GO:0030595)	57	4	0.29	+	13.82	0.00025	0.0384
I-kappaB kinase/NF-kappaB signaling (GO:0007249)	58	4	0.29	+	13.58	0.000267	0.0405
cellular response to lipopolysaccharide (GO:0071222)	105	7	0.53	+	13.13	1.46e-06	0.00179
cell chemotaxis (GO:0060326)	94	6	0.48	+	12.57	1.09e-05	0.00412
cellular response to molecule of bacterial origin (GO:0071219)	111	7	0.56	+	12.42	2.07e-06	0.00204
cellular response to biotic stimulus (GO:0071216)	129	7	0.66	+	10.69	5.35e-06	0.00315
response to lipopolysaccharide (GO:0032496)	195	10	0.99	+	10.1	7.27e-08	0.000178
response to molecule of bacterial origin (GO:0002237)	207	10	1.05	+	9.51	1.24e-07	0.000261
positive regulation of leukocyte differentiation (GO:1902107)	104	5	0.53	+	9.47	0.000221	0.0357
positive regulation of hemopoiesis (GO:1903708)	104	5	0.53	+	9.47	0.000221	0.0353
circadian rhythm (GO:0007623)	104	5	0.53	+	9.47	0.000221	0.0349
response to tumor necrosis factor (GO:0034612)	192	8	0.97	+	8.21	7.12e-06	0.00361
cellular response to tumor necrosis factor (GO:0071356)	170	7	0.86	+	8.11	2.98e-05	0.00895
response to mechanical stimulus (GO:0009612)	152	6	0.77	+	7.77	0.000143	0.0266
leukocyte migration (GO:0050900)	162	6	0.82	+	7.29	0.0002	0.033
intracellular receptor signaling pathway (GO:0030522)	168	6	0.85	+	7.03	0.000241	0.0374
regulation of hemopoiesis (GO:1903706)	281	10	1.43	+	7.01	1.84e-06	0.00208
regulation of leukocyte cell-cell adhesion (GO:1903037)	201	7	1.02	+	6.86	8.3e-05	0.0172
regulation of myeloid cell differentiation (GO:0045637)	179	6	0.91	+	6.6	0.000336	0.0485
cellular response to lipid (GO:0071396)	329	11	1.67	+	6.58	9.63e-07	0.00129
inflammatory response (GO:0006954)	271	9	1.38	+	6.54	1.08e-05	0.00419
response to bacterium (GO:0009617)	321	10	1.63	+	6.13	5.79e-06	0.00328
response to lipid (GO:0033993)	566	16	2.87	+	5.57	2.21e-08	6.5e-05
cytokine-mediated signaling pathway (GO:0019221)	454	12	2.31	+	5.21	3.22e-06	0.00279
negative regulation of cell population proliferation (GO:0008285)	490	12	2.49	+	4.82	6.9e-06	0.00363
chemotaxis (GO:0006935)	333	8	1.69	+	4.73	0.000308	0.0462
taxis (GO:0042330)	334	8	1.7	+	4.72	0.000314	0.0466
regulation of cell adhesion (GO:0030155)	508	12	2.58	+	4.65	9.85e-06	0.00403
cell migration (GO:0016477)	603	14	3.06	+	4.57	1.94e-06	0.00204
response to cytokine (GO:0034097)	773	17	3.93	+	4.33	2.6e-07	0.000479
localization of cell (GO:0051674)	683	14	3.47	+	4.04	7.98e-06	0.00379
cell motility (GO:0048870)	683	14	3.47	+	4.04	7.98e-06	0.00367
tube morphogenesis (GO:0035239)	491	10	2.49	+	4.01	0.000195	0.0326
cellular response to oxygen-containing compound (GO:1901701)	746	15	3.79	+	3.96	4.48e-06	0.00314
cellular response to cytokine stimulus (GO:0071345)	701	14	3.56	+	3.93	1.07e-05	0.00424
response to other organism (GO:0051707)	754	15	3.83	+	3.92	5.09e-06	0.00341
response to external biotic stimulus (GO:0043207)	754	15	3.83	+	3.92	5.09e-06	0.00326
response to biotic stimulus (GO:0009607)	778	15	3.95	+	3.8	7.39e-06	0.00363
response to organic cyclic compound (GO:0014070)	623	12	3.16	+	3.79	7.05e-05	0.0155
response to hormone (GO:0009725)	588	11	2.99	+	3.68	0.000188	0.0318
response to abiotic stimulus (GO:0009628)	866	16	4.4	+	3.64	5.88e-06	0.0032
locomotion (GO:0040011)	837	15	4.25	+	3.53	1.74e-05	0.00611
leukocyte activation (GO:0045321)	672	12	3.41	+	3.52	0.000143	0.0269
response to oxygen-containing compound (GO:1901700)	1122	20	5.7	+	3.51	5.01e-07	0.00082
defense response (GO:0006952)	732	13	3.72	+	3.5	7.64e-05	0.0165
response to external stimulus (GO:0009605)	1508	26	7.66	+	3.4	9.01e-09	4.42e-05
positive regulation of transcription by RNA polymerase II (GO:0045944)	934	16	4.74	+	3.37	1.5e-05	0.00552
cellular response to organic substance (GO:0071310)	1675	28	8.51	+	3.29	3.56e-09	2.62e-05
regulation of cell population proliferation (GO:0042127)	1144	19	5.81	+	3.27	2.99e-06	0.00275
response to nitrogen compound (GO:1901698)	783	13	3.98	+	3.27	0.000149	0.0271
response to organonitrogen compound (GO:0010243)	734	12	3.73	+	3.22	0.000319	0.0465
positive regulation of multicellular organismal process (GO:0051240)	941	15	4.78	+	3.14	6.64e-05	0.015
regulation of immune system process (GO:0002682)	1008	16	5.12	+	3.13	3.78e-05	0.0101
response to endogenous stimulus (GO:0009719)	1017	16	5.16	+	3.1	4.21e-05	0.0109
immune response (GO:0006955)	1018	16	5.17	+	3.1	4.26e-05	0.0108
response to organic substance (GO:0010033)	2164	32	10.99	+	2.91	2.98e-09	4.39e-05
positive regulation of RNA metabolic process (GO:0051254)	1358	20	6.9	+	2.9	9.26e-06	0.00401
cellular response to chemical stimulus (GO:0070887)	2055	30	10.44	+	2.87	1.74e-08	6.4e-05
movement of cell or subcellular component (GO:0006928)	1050	15	5.33	+	2.81	0.000222	0.0347
positive regulation of nucleic acid-templated transcription (GO:1903508)	1272	18	6.46	+	2.79	5.01e-05	0.0121
positive regulation of transcription, DNA-templated (GO:0045893)	1272	18	6.46	+	2.79	5.01e-05	0.0119
positive regulation of RNA biosynthetic process (GO:1902680)	1273	18	6.46	+	2.78	5.06e-05	0.0118
biological process involved in interspecies interaction between organisms (GO:0044419)	1388	19	7.05	+	2.7	4.58e-05	0.0112
positive regulation of cellular biosynthetic process (GO:0031328)	1545	21	7.85	+	2.68	1.75e-05	0.006
positive regulation of biosynthetic process (GO:0009891)	1567	21	7.96	+	2.64	2.17e-05	0.0071
positive regulation of nucleobase-containing compound metabolic process (GO:0045935)	1498	20	7.61	+	2.63	3.86e-05	0.0101
cell surface receptor signaling pathway (GO:0007166)	1608	21	8.17	+	2.57	3.19e-05	0.00904
immune system process (GO:0002376)	1689	22	8.58	+	2.57	2e-05	0.00668
positive regulation of macromolecule biosynthetic process (GO:0010557)	1473	19	7.48	+	2.54	0.000102	0.02
response to chemical (GO:0042221)	2809	33	14.26	+	2.31	5.43e-07	0.0008
positive regulation of macromolecule metabolic process (GO:0010604)	2653	30	13.47	+	2.23	5.25e-06	0.00322
positive regulation of nitrogen compound metabolic process (GO:0051173)	2409	27	12.23	+	2.21	2.5e-05	0.00767
regulation of transcription by RNA polymerase II (GO:0006357)	1964	22	9.97	+	2.21	0.000214	0.035
positive regulation of cellular metabolic process (GO:0031325)	2549	28	12.94	+	2.16	3.11e-05	0.00915
response to stress (GO:0006950)	2560	27	13	+	2.08	7.97e-05	0.0168
positive regulation of metabolic process (GO:0009893)	2869	30	14.57	+	2.06	3.76e-05	0.0102
regulation of transcription, DNA-templated (GO:0006355)	2632	27	13.37	+	2.02	0.000164	0.0292
regulation of nucleic acid-templated transcription (GO:1903506)	2633	27	13.37	+	2.02	0.000165	0.0289
regulation of RNA biosynthetic process (GO:2001141)	2637	27	13.39	+	2.02	0.000167	0.0286
regulation of RNA metabolic process (GO:0051252)	2867	29	14.56	+	1.99	8.38e-05	0.0171
regulation of biosynthetic process (GO:0009889)	3226	32	16.38	+	1.95	4.46e-05	0.0111
regulation of cellular macromolecule biosynthetic process (GO:2000112)	3027	30	15.37	+	1.95	0.000107	0.0208
regulation of macromolecule biosynthetic process (GO:0010556)	3050	30	15.49	+	1.94	0.000115	0.0219
regulation of cellular biosynthetic process (GO:0031326)	3161	31	16.05	+	1.93	7.79e-05	0.0166
regulation of gene expression (GO:0010468)	3675	34	18.66	+	1.82	9.87e-05	0.0196
negative regulation of biological process (GO:0048519)	4089	36	20.76	+	1.73	0.000166	0.0288
cellular response to stimulus (GO:0051716)	4456	38	22.63	+	1.68	0.000148	0.0273
regulation of macromolecule metabolic process (GO:0060255)	4766	39	24.2	+	1.61	0.000314	0.0462

## Sheet: Figure 2 - Source data 1D
Figure 2- source data 1D. Transcription factor enrichment analysis for subset of genes represented in the transcripts upregulated > 2 fold upon TRAIL treatment (with 1 hr DMSO pre-treatment)
Rank	TF	Score	Library	Overlapping_Genes
1	CSRNP1	6.5	ARCHS4 Coexpression,2;GTEx Coexpression,11	KLF10,BTG2,EGR2,JUN,EGR3,CEBPD,STX11,RELB,ICAM1,NFKBIA,NR4A2,NR4A1,NR4A3,IRF1,NFKBIZ,FOSB,NFKBIE
2	FOSB	8.667	ARCHS4 Coexpression,10;Enrichr Queries,14;GTEx Coexpression,2	BTG2,CEBPD,SDC4,TNFAIP2,CXCL1,CXCL3,CXCL2,THBS1,ICAM1,TUBA1A,PLAU,NFKBIZ,LONP1,KLF10,EGR2,JUN,EGR3,GEM,NFKBIA,NR4A2,NR4A1,NR4A3,ELF3,IRF1,HSPA1B,BIRC3
3	RELB	14.5	ARCHS4 Coexpression,27;Enrichr Queries,5;ReMap ChIP-seq,4;GTEx Coexpression,22	BTG2,ANKRD33B,SDC4,CEBPD,TNFAIP2,CXCL1,CXCL3,TANK,CXCL2,THBS1,STX11,ICAM1,RELB,IFIH1,PLAU,NFKBIZ,LONP1,SMG7-AS1,KLF10,EGR2,JUN,TNFRSF9,SKIDA1,GEM,NR4A2,NFKBIA,NR4A1,NEURL4,NR4A3,IRF1,FOSB,NFKBIE,BIRC3
4	ZNF267	16.67	ARCHS4 Coexpression,11;Enrichr Queries,3;GTEx Coexpression,36	BTG2,CEBPD,AMD1,TNFAIP2,CXCL1,CXCL3,CXCL2,THBS1,TANK,STX11,RELB,ICAM1,IFIH1,DUSP10,PLAU,NFKBIZ,LONP1,KLF10,EGR2,JUN,TNFRSF9,GEM,NR4A2,NFKBIA,NR4A1,NR4A3,IRF1,FOSB,NFKBIE,BIRC3
5	REL	17.67	ARCHS4 Coexpression,35;Enrichr Queries,1;GTEx Coexpression,17	BTG2,CEBPD,SDC4,TNFAIP2,CXCL1,CXCL3,CXCL2,THBS1,STX11,RELB,ICAM1,IFIH1,DUSP10,PLAU,NFKBIZ,LONP1,KLF10,EGR2,JUN,EGR3,TNFRSF9,GEM,PTBP3,NR4A2,NFKBIA,NR4A1,NR4A3,IRF1,FOSB,NFKBIE,BIRC3
6	BATF3	20	ARCHS4 Coexpression,23;Enrichr Queries,27;GTEx Coexpression,10	BTG2,EGR2,JUN,EGR3,CEBPD,SDC4,TNFRSF9,TNFAIP2,CXCL2,THBS1,STX11,ICAM1,RELB,IFIH1,NFKBIA,NR4A1,NR4A3,PLAU,IRF1,LONP1,FOSB,NFKBIE,BIRC3
7	JUNB	20	ARCHS4 Coexpression,14;Enrichr Queries,13;ReMap ChIP-seq,49;GTEx Coexpression,4	BTG2,CEBPD,SDC4,TNFAIP2,CXCL1,CXCL2,THBS1,STX11,ICAM1,RELB,LYL1,DUSP10,TUBA1A,PLAU,NFKBIZ,LONP1,KLF10,BRD2,JUN,EGR2,EGR3,GEM,NFKBIA,NR4A2,NR4A1,NR4A3,PDIK1L,IRF1,FOSB,NFKBIE,HSPA1B,BIRC3
8	NR4A3	20.33	ARCHS4 Coexpression,7;Enrichr Queries,6;GTEx Coexpression,48	BTG2,CEBPD,SDC4,TNFAIP2,CXCL1,CXCL3,CXCL2,THBS1,STX11,ICAM1,RELB,DUSP10,PLAU,NFKBIZ,LONP1,KLF10,EGR2,JUN,EGR3,GEM,NR4A2,NFKBIA,NR4A1,IRF1,FOSB,NFKBIE,BIRC3
9	JUN	22	Literature ChIP-seq,39;ARCHS4 Coexpression,17;ENCODE ChIP-seq,3;Enrichr Queries,16;ReMap ChIP-seq,42;GTEx Coexpression,15	BTG2,ANKRD33B,SDC4,CEBPD,MEPCE,TNFAIP2,CXCL3,CXCL2,THBS1,TANK,STX11,ICAM1,DUSP10,TUBA1A,PLAU,NFKBIZ,LONP1,FAM71A,KLF10,BRD2,EGR2,JUN,EGR3,HMGCS1,ARL14,SKIDA1,UBE2G2,GEM,NFKBIA,NR4A2,NR4A1,NR4A3,IRF1,FOSB,ADAM9,NFKBIE,HSPA1B,BIRC3
10	EGR1	23.17	Literature ChIP-seq,18;ARCHS4 Coexpression,21;ENCODE ChIP-seq,53;Enrichr Queries,17;ReMap ChIP-seq,29;GTEx Coexpression,1	BTG2,CEBPD,SDC4,MEPCE,TNFAIP2,CXCL1,ELK1,CXCL2,THBS1,TANK,ICAM1,RELB,LYL1,TUBA1A,NUAK2,PLAU,NFKBIZ,LONP1,SMG7-AS1,CD59,KLF10,JAG2,NANOS1,BRD2,EGR2,JUN,EGR3,HMGCS1,SKIDA1,IRX3,UBE2G2,GEM,PTBP3,NR4A2,NFKBIA,NR4A1,NEURL4,MTNR1A,NR4A3,IRF1,FOSB,TRIM15,NFKBIE,HSPA1B,BIRC3
11	NFKB2	23.5	ARCHS4 Coexpression,59;Enrichr Queries,7;ReMap ChIP-seq,19;GTEx Coexpression,9	BTG2,ANKRD33B,CEBPD,SDC4,TNFAIP2,CXCL1,TANK,CXCL2,THBS1,STX11,ICAM1,RELB,IFIH1,NUAK2,PLAU,NFKBIZ,LONP1,FAM71A,EGR2,JUN,TNFRSF9,GEM,NR4A2,NFKBIA,NR4A1,NEURL4,NR4A3,IRF1,FOSB,NFKBIE,BIRC3
12	FOS	24.4	ARCHS4 Coexpression,20;ENCODE ChIP-seq,32;Enrichr Queries,28;ReMap ChIP-seq,37;GTEx Coexpression,5	BTG2,SDC4,CEBPD,AMD1,MEPCE,CXCL1,CXCL2,THBS1,ICAM1,LYL1,DUSP10,NUAK2,TUBA1A,PLAU,NFKBIZ,LONP1,ZBED5,KLF10,EGR2,JUN,EGR3,HMGCS1,ARL14,GEM,NFKBIA,NR4A2,NR4A1,NR4A3,IRF1,FOSB,ADAM9,NOL10,IRF6,NFKBIE,BIRC3
13	NFIL3	30.33	ARCHS4 Coexpression,55;Enrichr Queries,18;GTEx Coexpression,18	BTG2,CEBPD,SDC4,TNFAIP2,CXCL1,TANK,CXCL2,THBS1,STX11,RELB,ICAM1,DUSP10,PLAU,NFKBIZ,LONP1,KLF10,EGR2,JUN,EGR3,GEM,NR4A2,NFKBIA,NR4A1,NR4A3,IRF1,FOSB,BIRC3
14	PLSCR1	30.5	ARCHS4 Coexpression,42;GTEx Coexpression,19	IFIH1,CEBPD,IRF1,TNFAIP2,CXCL3,TANK,CXCL2,STX11,RELB,ICAM1
15	ATF3	31.67	Literature ChIP-seq,11;ARCHS4 Coexpression,1;ENCODE ChIP-seq,41;Enrichr Queries,2;ReMap ChIP-seq,132;GTEx Coexpression,3	BTG2,CEBPD,SDC4,MEPCE,TNFAIP2,CXCL1,CXCL3,CXCL2,THBS1,ICAM1,RELB,IFIH1,DUSP10,TUBA1A,NUAK2,PLAU,NFKBIZ,DPH3,LONP1,SMG7-AS1,CD59,ZBED5,KLF10,BRD2,EGR2,JUN,EGR3,HMGCS1,ARL14,TNFRSF9,GEM,NFKBIA,NR4A2,NR4A1,NEURL4,NR4A3,ELF3,IRF1,FOSB,NOL10,NFKBIE,HSPA1B,BIRC3
16	MSC	33.33	ARCHS4 Coexpression,29;Enrichr Queries,12;GTEx Coexpression,59	BTG2,ANKRD33B,CEBPD,SDC4,TNFAIP2,CXCL1,CXCL3,CXCL2,THBS1,STX11,ICAM1,RELB,IFIH1,DUSP10,PLAU,NFKBIZ,LONP1,EGR2,JUN,EGR3,TNFRSF9,GEM,NR4A2,NFKBIA,NR4A1,NR4A3,IRF1,FOSB,NFKBIE,BIRC3
17	ETV3L	34.33	ARCHS4 Coexpression,39;Enrichr Queries,26;GTEx Coexpression,38	BTG2,ANKRD33B,SDC4,TNFAIP2,CXCL1,CXCL3,CXCL2,THBS1,STX11,ICAM1,RELB,IFIH1,DUSP10,PLAU,NFKBIZ,EGR2,JUN,EGR3,TNFRSF9,GEM,NR4A2,NFKBIA,NR4A1,NR4A3,FOSB,NFKBIE,BIRC3
18	EGR2	35.33	ARCHS4 Coexpression,19;Enrichr Queries,8;GTEx Coexpression,79	BTG2,CEBPD,SDC4,TNFAIP2,CXCL1,CXCL3,CXCL2,THBS1,STX11,ICAM1,RELB,DUSP10,PLAU,NFKBIZ,LONP1,KLF10,JUN,EGR3,TNFRSF9,GEM,NR4A2,NFKBIA,NR4A1,NR4A3,IRF1,FOSB,NFKBIE,BIRC3
19	EGR3	35.67	ARCHS4 Coexpression,18;Enrichr Queries,42;GTEx Coexpression,47	KLF10,EGR2,BTG2,JUN,CEBPD,SDC4,IRX3,CXCL1,CXCL2,THBS1,GEM,ICAM1,NR4A2,NFKBIA,NR4A1,DUSP10,NR4A3,PLAU,IRF1,NFKBIZ,LONP1,FOSB,IRF6,FAM71A
20	KLF6	37.25	ARCHS4 Coexpression,9;Enrichr Queries,31;ReMap ChIP-seq,68;GTEx Coexpression,41	BTG2,SDC4,CEBPD,TNFAIP2,CXCL2,THBS1,STX11,ICAM1,RELB,NUAK2,DUSP10,TUBA1A,PLAU,NFKBIZ,LONP1,KLF10,JUN,EGR2,EGR3,HMGCS1,GEM,NR4A2,NFKBIA,NR4A1,ELF3,IRF1,ADAM9,FOSB,IRF6,NFKBIE,BIRC3
21	ARID5A	37.5	ARCHS4 Coexpression,38;GTEx Coexpression,37	NFKBIA,IRF1,NFKBIE,GEM,STX11,RELB,ICAM1
22	ZBTB21	42.5	ARCHS4 Coexpression,73;GTEx Coexpression,12	KLF10,NR4A2,BRD2,EGR3,NR4A3,CEBPD,SDC4,NFKBIZ,GEM
23	NR4A1	43	ARCHS4 Coexpression,5;Enrichr Queries,35;ReMap ChIP-seq,125;GTEx Coexpression,7	BTG2,CEBPD,SDC4,MEPCE,CXCL1,CXCL2,THBS1,ICAM1,RELB,LYL1,TUBA1A,NFKBIZ,LONP1,SMG7-AS1,KLF10,EGR2,JUN,EGR3,HMGCS1,SKIDA1,TNFRSF9,GEM,NR4A2,NFKBIA,NR4A3,ELF3,IRF1,FOSB,NFKBIE,HSPA1B
24	ETS2	45	Literature ChIP-seq,121;ARCHS4 Coexpression,13;Enrichr Queries,25;GTEx Coexpression,21	BTG2,SDC4,CEBPD,TNFAIP2,CXCL1,CXCL2,THBS1,STX11,ICAM1,RELB,DUSP10,PLAU,NFKBIZ,LONP1,KLF10,EGR2,JUN,VDR,GEM,NFKBIA,NR4A2,NR4A1,ELF3,IRF1,FOSB,TRIM15,IRF6,BIRC3
25	IRF4	46.6	ARCHS4 Coexpression,30;ENCODE ChIP-seq,67;Enrichr Queries,60;ReMap ChIP-seq,41;GTEx Coexpression,35	BTG2,ANKRD33B,MEPCE,CXCL2,THBS1,STX11,ICAM1,RELB,IFIH1,DUSP10,NUAK2,PLAU,NFKBIZ,LONP1,SMG7-AS1,BRD2,EGR2,JUN,EGR3,VDR,TNFRSF9,GEM,NR4A2,NFKBIA,NR4A1,NEURL4,NR4A3,IRF1,FOSB,NOL10,NFKBIE,BIRC3
26	NFKB1	49	ARCHS4 Coexpression,16;Enrichr Queries,29;ReMap ChIP-seq,131;GTEx Coexpression,20	BTG2,ANKRD33B,CEBPD,SDC4,TNFAIP2,CXCL1,CXCL3,CXCL2,THBS1,STX11,RELB,ICAM1,IFIH1,NUAK2,PLAU,NFKBIZ,LONP1,FAM71A,EGR2,JUN,VDR,PTBP3,NR4A2,NFKBIA,NR4A1,NEURL4,NR4A3,IRF1,FOSB,NFKBIE,BIRC3
27	JUND	51.17	Literature ChIP-seq,40;ARCHS4 Coexpression,49;ENCODE ChIP-seq,6;Enrichr Queries,99;ReMap ChIP-seq,97;GTEx Coexpression,16	BTG2,ANKRD33B,SDC4,CEBPD,MEPCE,TNFAIP2,CXCL3,THBS1,TANK,ELK1,CXCL2,STX11,IFIH1,TUBA1A,DUSP10,PLAU,NFKBIZ,LONP1,KLF10,BRD2,JUN,EGR3,HMGCS1,ARL14,SKIDA1,GEM,NR4A2,NFKBIA,NR4A1,ELF3,IRF1,FOSB,ADAM9,NFKBIE,HSPA1B
28	BHLHE40	54.5	ARCHS4 Coexpression,3;ENCODE ChIP-seq,46;ReMap ChIP-seq,60;GTEx Coexpression,109	BTG2,SDC4,MEPCE,TNFAIP2,CXCL2,ICAM1,RELB,LYL1,DUSP10,NUAK2,TUBA1A,NFKBIZ,LONP1,KLF10,BRD2,JUN,HMGCS1,VDR,PTBP3,GULP1,NR4A2,NFKBIA,NR4A1,NEURL4,NR4A3,ELF3,PDIK1L,FOSB,IRF6,NFKBIE,HSPA1B,BIRC3
29	KLF4	56.4	Literature ChIP-seq,46;ARCHS4 Coexpression,15;Enrichr Queries,36;ReMap ChIP-seq,104;GTEx Coexpression,81	BTG2,SDC4,CEBPD,MEPCE,TNFAIP2,CXCL1,CXCL2,THBS1,TANK,STX11,ICAM1,NUAK2,TUBA1A,PLAU,NFKBIZ,LONP1,KLF10,EGR2,JUN,EGR3,VDR,IRX3,GEM,NR4A2,NFKBIA,NR4A1,NEURL4,NR4A3,ELF3,IRF1,FOSB,IRF6,NFKBIE,BIRC3
30	FOXQ1	57.67	ARCHS4 Coexpression,53;Enrichr Queries,50;GTEx Coexpression,70	BTG2,EGR2,JUN,ARL14,CEBPD,SDC4,IRX3,CXCL1,CXCL2,THBS1,GEM,ICAM1,NR4A2,NFKBIA,NR4A1,ELF3,PLAU,IRF1,NFKBIZ,LONP1,FOSB,TRIM15,IRF6
31	BATF	59.4	ARCHS4 Coexpression,24;ENCODE ChIP-seq,55;Enrichr Queries,73;ReMap ChIP-seq,48;GTEx Coexpression,97	BTG2,ANKRD33B,CEBPD,TNFAIP2,CXCL1,TANK,CXCL2,THBS1,STX11,ICAM1,RELB,IFIH1,DUSP10,NFKBIZ,LONP1,CD59,FAM71A,BRD2,EGR2,JUN,TNFRSF9,NFKBIA,NR4A3,IRF1,FOSB,NFKBIE,BIRC3
32	CEBPB	68	Literature ChIP-seq,30;ARCHS4 Coexpression,102;ENCODE ChIP-seq,8;Enrichr Queries,46;ReMap ChIP-seq,119;GTEx Coexpression,103	BTG2,CEBPD,SDC4,TNFAIP2,CXCL1,CXCL2,THBS1,ELK1,STX11,RELB,ICAM1,NUAK2,TUBA1A,PLAU,NFKBIZ,DPH3,LONP1,KLF10,BRD2,EGR2,JUN,EGR3,HMGCS1,SKIDA1,UBE2G2,NFKBIA,NR4A1,IRF1,FOSB,ADAM9,FSCN3,HSPA1B,BIRC3
33	FOSL1	69	ARCHS4 Coexpression,74;ENCODE ChIP-seq,59;Enrichr Queries,11;ReMap ChIP-seq,130;GTEx Coexpression,71	BTG2,ANKRD33B,SDC4,CEBPD,TNFAIP2,CXCL1,CXCL3,THBS1,CXCL2,TANK,ICAM1,RELB,LYL1,PLAU,NFKBIZ,LONP1,CD59,KLF10,JUN,EGR2,EGR3,HMGCS1,ARL14,GEM,NR4A2,NFKBIA,NR4A1,NR4A3,IRF1,ADAM9,FOSB,NOL10,BIRC3
34	HIVEP1	71	ARCHS4 Coexpression,135;Enrichr Queries,65;GTEx Coexpression,13	KLF10,BTG2,EGR2,JUN,ANKRD33B,SDC4,THBS1,PTBP3,RELB,ICAM1,IFIH1,NR4A2,NFKBIA,NR4A1,DUSP10,NR4A3,IRF1,NFKBIZ,LONP1,FOSB,NFKBIE,BIRC3
35	STAT1	74.83	Literature ChIP-seq,134;ARCHS4 Coexpression,60;ENCODE ChIP-seq,12;Enrichr Queries,149;ReMap ChIP-seq,2;GTEx Coexpression,92	BTG2,ANKRD33B,SDC4,CEBPD,TNFAIP2,CXCL1,CXCL2,THBS1,STX11,ICAM1,RELB,IFIH1,LYL1,DUSP10,PLAU,NFKBIZ,SMG7-AS1,ZBED5,FAM71A,KLF10,BRD2,EGR2,JUN,NR4A2,NFKBIA,NR4A1,NR4A3,ELF3,IRF1,FOSB,NOL10,NFKBIE,BIRC3
36	ZNF331	75	ARCHS4 Coexpression,159;Enrichr Queries,41;GTEx Coexpression,25	KLF10,BTG2,EGR2,JUN,EGR3,CEBPD,CXCL2,THBS1,GEM,ICAM1,NR4A2,NFKBIA,NR4A1,NR4A3,DUSP10,TUBA1A,IRF1,NFKBIZ,LONP1,FOSB,BIRC3
37	RELA	78.33	Literature ChIP-seq,1;ARCHS4 Coexpression,67;ENCODE ChIP-seq,1;Enrichr Queries,111;ReMap ChIP-seq,1;GTEx Coexpression,289	BTG2,ANKRD33B,CEBPD,SDC4,MEPCE,TNFAIP2,CXCL1,CXCL3,CXCL2,THBS1,TANK,ELK1,STX11,ICAM1,RELB,IFIH1,DUSP10,NUAK2,TUBA1A,PLAU,NFKBIZ,LONP1,SMG7-AS1,CD59,KLF10,JUN,EGR2,EGR3,HMGCS1,ARL14,VDR,TNFRSF9,GEM,NR4A2,NFKBIA,NR4A1,NEURL4,NR4A3,ELF3,IRF1,FOSB,TRIM15,IRF6,NFKBIE,BIRC3
38	SNAI1	81.67	ARCHS4 Coexpression,54;Enrichr Queries,15;GTEx Coexpression,176	BTG2,CEBPD,SDC4,TNFAIP2,CXCL1,CXCL3,CXCL2,THBS1,ICAM1,DUSP10,PLAU,NFKBIZ,LONP1,KLF10,EGR2,JUN,EGR3,VDR,GEM,NR4A2,NFKBIA,NR4A1,NR4A3,IRF1,FOSB,NFKBIE
39	NR3C1	85.5	Literature ChIP-seq,37;ARCHS4 Coexpression,32;ENCODE ChIP-seq,26;Enrichr Queries,297;ReMap ChIP-seq,57;GTEx Coexpression,64	BTG2,ANKRD33B,SDC4,CEBPD,MEPCE,CXCL3,TANK,CXCL2,THBS1,STX11,ICAM1,RELB,IFIH1,NUAK2,TUBA1A,PLAU,DPH3,KLF10,JUN,HMGCS1,ARL14,UBE2G2,NFKBIA,NR4A2,NR4A1,NR4A3,ELF3,IRF1,FOSB,NOL10,BIRC3
40	IRF7	89	ARCHS4 Coexpression,89;Enrichr Queries,70;GTEx Coexpression,108	BTG2,EGR2,JUN,CEBPD,TNFRSF9,TNFAIP2,CXCL1,CXCL2,THBS1,STX11,ICAM1,RELB,IFIH1,NFKBIA,NR4A1,IRF1,NFKBIZ,LONP1,FOSB,NFKBIE,BIRC3
41	STAT5A	89	Literature ChIP-seq,13;ARCHS4 Coexpression,57;ENCODE ChIP-seq,96;Enrichr Queries,43;ReMap ChIP-seq,40;GTEx Coexpression,285	BTG2,CEBPD,SDC4,TNFAIP2,CXCL1,TANK,ELK1,CXCL2,THBS1,STX11,ICAM1,RELB,IFIH1,LYL1,DUSP10,PLAU,NFKBIZ,DPH3,LONP1,FAM71A,BRD2,EGR2,JUN,VDR,TNFRSF9,UBE2G2,GULP1,NFKBIA,NR4A2,NR4A1,ELF3,PDIK1L,IRF1,FOSB,TRIM15,NFKBIE,BIRC3
42	MSANTD3	91	ARCHS4 Coexpression,122;GTEx Coexpression,60	DPH3,MEPCE,ADAM9,NOL10,CXCL3
43	FOSL2	93.6	ARCHS4 Coexpression,31;ENCODE ChIP-seq,37;Enrichr Queries,20;ReMap ChIP-seq,155;GTEx Coexpression,225	BTG2,CEBPD,SDC4,MEPCE,AMD1,TNFAIP2,CXCL1,CXCL2,THBS1,STX11,ICAM1,RELB,DUSP10,TUBA1A,PLAU,NFKBIZ,LONP1,ZBED5,KLF10,EGR2,JUN,EGR3,ARL14,GEM,NFKBIA,NR4A2,NR4A1,NR4A3,ELF3,IRF1,ADAM9,FOSB,NOL10,BIRC3
44	IRF8	94.75	Literature ChIP-seq,52;ARCHS4 Coexpression,96;Enrichr Queries,142;GTEx Coexpression,89	BTG2,EGR2,JUN,CEBPD,IRX3,TNFAIP2,CXCL2,THBS1,STX11,ICAM1,RELB,PTBP3,IFIH1,NFKBIA,PLAU,IRF1,NFKBIZ,NFKBIE,BIRC3
45	CREM	99.6	Literature ChIP-seq,64;ARCHS4 Coexpression,25;Enrichr Queries,24;ReMap ChIP-seq,10;GTEx Coexpression,375	BTG2,ANKRD33B,CEBPD,SDC4,MEPCE,AMD1,TNFAIP2,CXCL1,CXCL3,CXCL2,THBS1,TANK,STX11,ICAM1,RELB,LYL1,DUSP10,NFKBIZ,DPH3,LONP1,SMG7-AS1,FAM71A,KLF10,JAG2,BRD2,EGR2,JUN,EGR3,VDR,SKIDA1,UBE2G2,GEM,PTBP3,NR4A2,NFKBIA,NR4A1,NEURL4,NR4A3,PDIK1L,IRF1,FOSB,NOL10,NFKBIE,HSPA1B,BIRC3
46	HIF1A	102.6	Literature ChIP-seq,35;ARCHS4 Coexpression,48;Enrichr Queries,89;ReMap ChIP-seq,193;GTEx Coexpression,148	KLF10,JUN,BTG2,CEBPD,SDC4,HMGCS1,TNFAIP2,THBS1,CXCL2,ICAM1,NR4A2,NFKBIA,TUBA1A,ELF3,IRF1,NFKBIZ,LONP1,ADAM9,FOSB,CD59,NFKBIE,BIRC3
47	DDIT3	104.7	ARCHS4 Coexpression,78;Enrichr Queries,9;GTEx Coexpression,227	BTG2,CEBPD,SDC4,CXCL2,THBS1,ICAM1,RELB,DUSP10,TUBA1A,PLAU,NFKBIZ,LONP1,KLF10,JUN,EGR2,EGR3,HMGCS1,GEM,NR4A2,NFKBIA,NR4A1,NEURL4,NR4A3,IRF1,FOSB,HSPA1B,BIRC3
48	PRDM1	108.8	ARCHS4 Coexpression,61;ENCODE ChIP-seq,27;Enrichr Queries,10;ReMap ChIP-seq,185;GTEx Coexpression,261	BTG2,ANKRD33B,CEBPD,SDC4,MEPCE,TNFAIP2,CXCL1,CXCL2,THBS1,ELK1,STX11,ICAM1,RELB,IFIH1,NUAK2,DUSP10,PLAU,NFKBIZ,LONP1,SMG7-AS1,FAM71A,EGR2,JUN,EGR3,VDR,TNFRSF9,ARHGAP5-AS1,GEM,PTBP3,NR4A2,NFKBIA,NR4A1,NR4A3,IRF1,FOSB,BIRC3
49	NFE2L2	111	Literature ChIP-seq,123;ARCHS4 Coexpression,8;Enrichr Queries,98;ReMap ChIP-seq,103;GTEx Coexpression,223	BTG2,SDC4,CEBPD,MEPCE,TNFAIP2,THBS1,TANK,STX11,ICAM1,RELB,IFIH1,LYL1,TUBA1A,NFKBIZ,LONP1,CD59,KLF10,JUN,HMGCS1,PTBP3,NFKBIA,NR4A2,NR4A1,NR4A3,IRF1,FOSB,ADAM9,IRF6,NFKBIE,HSPA1B,BIRC3
50	AHR	113.4	Literature ChIP-seq,86;ARCHS4 Coexpression,41;Enrichr Queries,58;ReMap ChIP-seq,280;GTEx Coexpression,102	BTG2,CEBPD,SDC4,TNFAIP2,CXCL2,THBS1,ICAM1,PLAU,NFKBIZ,LONP1,CD59,KLF10,EGR2,JUN,UBE2G2,GEM,GULP1,PTBP3,NFKBIA,NR4A2,NR4A1,ELF3,IRF1,ADAM9,BIRC3
51	PAX5	119.6	ARCHS4 Coexpression,97;ENCODE ChIP-seq,31;Enrichr Queries,403;ReMap ChIP-seq,23;GTEx Coexpression,44	BTG2,ANKRD33B,MEPCE,AMD1,TNFAIP2,THBS1,ICAM1,IFIH1,LYL1,LONP1,KLF10,NANOS1,BRD2,EGR2,JUN,EGR3,HMGCS1,NR4A2,NR4A1,NEURL4,NR4A3,PDIK1L,IRF1,FOSB,NFKBIE,HSPA1B,BIRC3
52	ETV3	120	ARCHS4 Coexpression,12;Enrichr Queries,52;GTEx Coexpression,296	BTG2,SDC4,TNFAIP2,CXCL3,THBS1,STX11,ICAM1,RELB,IFIH1,DUSP10,NFKBIZ,LONP1,KLF10,EGR2,JUN,EGR3,IRX3,PTBP3,NR4A2,NFKBIA,NR4A1,NR4A3,IRF1,FOSB,IRF6,NFKBIE,BIRC3
53	TRAFD1	128	ARCHS4 Coexpression,81;Enrichr Queries,215;GTEx Coexpression,88	BTG2,JUN,SDC4,TNFAIP2,THBS1,STX11,PTBP3,RELB,ICAM1,IFIH1,NFKBIA,IRF1,NFKBIZ,LONP1,BIRC3
54	ELK3	135.8	Literature ChIP-seq,58;ARCHS4 Coexpression,172;Enrichr Queries,197;GTEx Coexpression,116	KLF10,BRD2,BTG2,JUN,CEBPD,SDC4,AMD1,THBS1,GEM,ICAM1,NFKBIA,NR4A2,LYL1,DUSP10,NR4A3,PLAU,IRF1,LONP1,ADAM9,CD59,BIRC3
55	ETV7	136.7	ARCHS4 Coexpression,26;Enrichr Queries,76;GTEx Coexpression,308	EGR2,JUN,EGR3,TNFRSF9,TNFAIP2,CXCL1,CXCL2,THBS1,TANK,STX11,PTBP3,ICAM1,RELB,IFIH1,NFKBIA,NR4A3,IRF1,FOSB,IRF6,NFKBIE,BIRC3
56	STAT3	137	Literature ChIP-seq,5;ARCHS4 Coexpression,409;ENCODE ChIP-seq,7;Enrichr Queries,296;ReMap ChIP-seq,7;GTEx Coexpression,98	BTG2,CEBPD,SDC4,MEPCE,CXCL2,THBS1,TANK,STX11,RELB,ICAM1,LYL1,NUAK2,TUBA1A,DUSP10,PLAU,NFKBIZ,LONP1,ZBED5,KLF10,JUN,EGR2,EGR3,HMGCS1,ARL14,ARHGAP5-AS1,NR4A2,NFKBIA,NEURL4,NR4A3,IRF1,FOSB,ADAM9,NOL10,IRF6,NFKBIE,BIRC3
57	HNF1B	139.3	ARCHS4 Coexpression,160;Enrichr Queries,225;ReMap ChIP-seq,33	BTG2,EGR2,JUN,ARL14,SDC4,VDR,CXCL1,ARHGAP5-AS1,CXCL3,CXCL2,TANK,THBS1,ICAM1,NR4A2,NR4A1,ELF3,PLAU,IRF1,SMG7-AS1,ADAM9,IRF6,BIRC3
58	ZNF597	144.7	ARCHS4 Coexpression,139;Enrichr Queries,77;GTEx Coexpression,218	KLF10,BTG2,EGR2,JUN,ANKRD33B,EGR3,AMD1,TANK,THBS1,GEM,ICAM1,NR4A2,NFKBIA,DUSP10,NR4A3,PLAU,IRF1,NFKBIZ,LONP1,FOSB
59	IKZF2	145.3	ARCHS4 Coexpression,50;Enrichr Queries,346;GTEx Coexpression,40	BTG2,EGR2,JUN,ANKRD33B,THBS1,PTBP3,ICAM1,IFIH1,NR4A2,DUSP10,IRF1,NFKBIZ,NFKBIE,BIRC3
60	CDX2	150	Literature ChIP-seq,17;ARCHS4 Coexpression,182;Enrichr Queries,280;ReMap ChIP-seq,39;GTEx Coexpression,232	BRD2,JUN,BTG2,EGR2,ARL14,SDC4,CEBPD,VDR,IRX3,CXCL3,CXCL2,TANK,THBS1,GULP1,NR4A2,NUAK2,ELF3,IRF1,NFKBIZ,SMG7-AS1,TRIM15,IRF6
61	KLF11	155.3	ARCHS4 Coexpression,158;Enrichr Queries,63;GTEx Coexpression,245	KLF10,BTG2,EGR2,JUN,CEBPD,SDC4,THBS1,GEM,STX11,ICAM1,NR4A2,NFKBIA,NR4A1,DUSP10,NR4A3,IRF1,NFKBIZ,LONP1,FOSB
62	CEBPD	155.4	Literature ChIP-seq,91;ARCHS4 Coexpression,406;ENCODE ChIP-seq,51;ReMap ChIP-seq,139;GTEx Coexpression,90	BRD2,JUN,SKIDA1,IRX3,MEPCE,AMD1,CXCL2,TANK,STX11,ICAM1,GULP1,NR4A2,NFKBIA,LYL1,NR4A1,PLAU,NFKBIZ,FOSB,NFKBIE,HSPA1B
63	RUNX2	168	Literature ChIP-seq,36;ARCHS4 Coexpression,439;Enrichr Queries,241;ReMap ChIP-seq,93;GTEx Coexpression,31	BTG2,ANKRD33B,SDC4,CEBPD,TNFAIP2,THBS1,TANK,ICAM1,DUSP10,PLAU,NFKBIZ,FAM71A,BRD2,JUN,EGR2,EGR3,VDR,GULP1,NFKBIA,NR4A2,NR4A3,IRF1,ADAM9,FOSB,BIRC3
64	SOX17	168	Literature ChIP-seq,105;ARCHS4 Coexpression,65;Enrichr Queries,319;GTEx Coexpression,183	JAG2,JUN,BTG2,EGR2,CEBPD,IRX3,TNFRSF9,THBS1,ICAM1,NR4A2,NFKBIA,NR4A1,DUSP10,NFKBIZ,FOSB,ADAM9,FSCN3
65	ARNTL	168.3	ARCHS4 Coexpression,255;Enrichr Queries,62;ReMap ChIP-seq,288;GTEx Coexpression,68	NANOS1,KLF10,BTG2,EGR2,JUN,EGR3,CEBPD,SDC4,TANK,THBS1,STX11,GEM,ICAM1,NR4A2,NFKBIA,NR4A1,DUSP10,PLAU,IRF1,NFKBIZ,LONP1,FOSB
66	MEF2B	168.5	ARCHS4 Coexpression,148;Enrichr Queries,84;ReMap ChIP-seq,136;GTEx Coexpression,306	BTG2,EGR2,JUN,ANKRD33B,EGR3,CEBPD,VDR,TNFRSF9,THBS1,ICAM1,RELB,NR4A2,NFKBIA,NR4A1,NR4A3,ELF3,IRF1,LONP1,FOSB,NFKBIE,ZBED5
67	ETV6	169	ARCHS4 Coexpression,161;Enrichr Queries,216;ReMap ChIP-seq,31;GTEx Coexpression,268	KLF10,BRD2,BTG2,JUN,SDC4,SKIDA1,MEPCE,TNFAIP2,TANK,THBS1,RELB,ICAM1,NFKBIA,IFIH1,LYL1,DUSP10,IRF1,NFKBIZ,LONP1,FOSB,NFKBIE,HSPA1B,BIRC3
68	FOXA1	169.7	Literature ChIP-seq,88;ARCHS4 Coexpression,397;ENCODE ChIP-seq,81;Enrichr Queries,236;ReMap ChIP-seq,8;GTEx Coexpression,208	BTG2,SDC4,CEBPD,AMD1,MEPCE,CXCL3,THBS1,TANK,DUSP10,NUAK2,CD59,KLF10,BRD2,JUN,IRX3,ARHGAP5-AS1,PTBP3,GULP1,NFKBIA,NR4A2,NR4A1,MTNR1A,ELF3,IRF1,ADAM9,IRF6,HSPA1B,BIRC3
69	OVOL1	173.3	ARCHS4 Coexpression,164;Enrichr Queries,45;GTEx Coexpression,311	BTG2,EGR2,JUN,EGR3,CEBPD,SDC4,VDR,CXCL1,CXCL2,THBS1,ICAM1,NR4A2,NFKBIA,NR4A1,NUAK2,ELF3,PLAU,IRF1,NFKBIZ,LONP1,FOSB,IRF6
70	HIVEP3	173.7	ARCHS4 Coexpression,22;Enrichr Queries,328;GTEx Coexpression,171	BTG2,EGR2,JUN,EGR3,IRX3,TNFAIP2,THBS1,GEM,STX11,ICAM1,RELB,NR4A1,DUSP10,NR4A3,IRF6,NFKBIE
71	TFAP2A	175.3	Literature ChIP-seq,145;ARCHS4 Coexpression,90;ENCODE ChIP-seq,16;Enrichr Queries,390;ReMap ChIP-seq,187;GTEx Coexpression,224	ANKRD33B,SDC4,CEBPD,MEPCE,AMD1,TNFAIP2,THBS1,ELK1,ICAM1,PLAU,LONP1,SMG7-AS1,CD59,ZBED5,KLF10,BRD2,EGR2,JUN,EGR3,VDR,IRX3,NR4A2,NR4A1,NR4A3,ELF3,IRF1,FOSB,IRF6,BIRC3
72	RFX5	175.6	ARCHS4 Coexpression,401;ENCODE ChIP-seq,9;Enrichr Queries,135;ReMap ChIP-seq,232;GTEx Coexpression,101	BTG2,ANKRD33B,CEBPD,SDC4,AMD1,MEPCE,TNFAIP2,THBS1,STX11,ICAM1,RELB,IFIH1,TUBA1A,NUAK2,DPH3,LONP1,ZBED5,KLF10,BRD2,JUN,HMGCS1,GEM,NFKBIA,NEURL4,ELF3,IRF1,FOSB,NOL10,NFKBIE,HSPA1B,BIRC3
73	ZNF469	176.5	ARCHS4 Coexpression,240;GTEx Coexpression,113	ADAM9,THBS1
74	BACH1	180.7	Literature ChIP-seq,79;ARCHS4 Coexpression,706;ENCODE ChIP-seq,33;Enrichr Queries,78;ReMap ChIP-seq,165;GTEx Coexpression,23	BTG2,CEBPD,SDC4,TNFAIP2,CXCL1,CXCL3,TANK,THBS1,CXCL2,STX11,RELB,ICAM1,NFKBIZ,LONP1,SMG7-AS1,CD59,KLF10,BRD2,EGR2,JUN,EGR3,GEM,PTBP3,GULP1,NR4A2,NFKBIA,NR4A1,NR4A3,ELF3,IRF1,ADAM9,FOSB,NOL10,TRIM15,NFKBIE,HSPA1B,BIRC3
75	FOXC1	181	ARCHS4 Coexpression,40;Enrichr Queries,160;GTEx Coexpression,343	JAG2,BRD2,BTG2,EGR2,JUN,EGR3,CEBPD,SDC4,IRX3,MEPCE,THBS1,GEM,GULP1,NR4A2,NFKBIA,NR4A1,NEURL4,LONP1,FOSB,HSPA1B
76	HEY1	181	ARCHS4 Coexpression,63;Enrichr Queries,147;GTEx Coexpression,333	KLF10,BTG2,EGR2,JUN,EGR3,HMGCS1,CEBPD,CXCL3,THBS1,GEM,ICAM1,NR4A2,NFKBIA,NR4A1,TUBA1A,FOSB
77	VDR	181.2	Literature ChIP-seq,8;ARCHS4 Coexpression,388;Enrichr Queries,91;ReMap ChIP-seq,137;GTEx Coexpression,282	BTG2,SDC4,CEBPD,TNFAIP2,THBS1,ICAM1,IFIH1,NUAK2,DUSP10,PLAU,LONP1,EGR2,JUN,EGR3,HMGCS1,VDR,PTBP3,NFKBIA,NR4A2,NR4A1,ELF3,IRF1,FOSB,TRIM15,IRF6,BIRC3
78	ELF5	184.2	Literature ChIP-seq,54;ARCHS4 Coexpression,231;Enrichr Queries,301;ReMap ChIP-seq,284;GTEx Coexpression,51	KLF10,BTG2,EGR2,JUN,EGR3,CEBPD,VDR,IRX3,THBS1,NR4A2,TUBA1A,ELF3,IRF1,NFKBIZ,SMG7-AS1,FOSB,CD59,NOL10,IRF6,ZBED5
79	ELF1	187.2	Literature ChIP-seq,94;ARCHS4 Coexpression,354;ENCODE ChIP-seq,105;ReMap ChIP-seq,124;GTEx Coexpression,259	BRD2,EGR3,HMGCS1,SDC4,MEPCE,TNFAIP2,STX11,PTBP3,ICAM1,NR4A2,NR4A1,LYL1,NEURL4,IRF1,FOSB,NFKBIE,ZBED5
80	MYB	190.8	Literature ChIP-seq,128;ARCHS4 Coexpression,333;ENCODE ChIP-seq,113;Enrichr Queries,400;ReMap ChIP-seq,76;GTEx Coexpression,95	BTG2,JUN,EGR2,EGR3,CEBPD,VDR,TNFAIP2,THBS1,PTBP3,NR4A2,LYL1,NR4A1,NEURL4,DUSP10,NR4A3,ELF3,IRF1,NFKBIZ,LONP1,FOSB,NFKBIE,BIRC3
81	ZNF878	198	ARCHS4 Coexpression,346;GTEx Coexpression,50	IFIH1,ANKRD33B,AMD1,NFKBIE,BIRC3,GULP1
82	IRF1	200.7	Literature ChIP-seq,139;ARCHS4 Coexpression,888;ENCODE ChIP-seq,99;Enrichr Queries,23;ReMap ChIP-seq,12;GTEx Coexpression,43	BTG2,SDC4,CEBPD,TNFAIP2,CXCL1,CXCL3,CXCL2,THBS1,STX11,ICAM1,RELB,IFIH1,DUSP10,NUAK2,PLAU,NFKBIZ,DPH3,LONP1,SMG7-AS1,CD59,ZBED5,FAM71A,KLF10,JUN,EGR2,VDR,ARHGAP5-AS1,NR4A2,NFKBIA,NR4A1,NR4A3,IRF1,FOSB,NOL10,NFKBIE,HSPA1B,BIRC3
83	TP63	200.8	Literature ChIP-seq,42;ARCHS4 Coexpression,198;Enrichr Queries,247;ReMap ChIP-seq,268;GTEx Coexpression,249	BTG2,ANKRD33B,CEBPD,SDC4,CXCL1,THBS1,TANK,DUSP10,NUAK2,PLAU,ZBED5,FAM71A,JAG2,NANOS1,EGR2,JUN,EGR3,VDR,IRX3,UBE2G2,PTBP3,ELF3,IRF1,FOSB,IRF6,HSPA1B
84	SRF	202.7	Literature ChIP-seq,151;ARCHS4 Coexpression,393;ENCODE ChIP-seq,21;Enrichr Queries,109;ReMap ChIP-seq,122;GTEx Coexpression,420	BTG2,CEBPD,SDC4,THBS1,ELK1,TANK,ICAM1,NUAK2,NFKBIZ,DPH3,LONP1,SMG7-AS1,KLF10,JUN,EGR2,EGR3,GEM,NR4A2,NFKBIA,NR4A1,NEURL4,NR4A3,IRF1,FOSB,NOL10,NFKBIE,HSPA1B,BIRC3
85	MAFK	206	ARCHS4 Coexpression,297;ENCODE ChIP-seq,11;Enrichr Queries,39;ReMap ChIP-seq,70;GTEx Coexpression,613	BTG2,ANKRD33B,CEBPD,SDC4,MEPCE,TNFAIP2,CXCL2,THBS1,TANK,STX11,ICAM1,RELB,DUSP10,PLAU,NFKBIZ,LONP1,FAM71A,KLF10,BRD2,EGR2,JUN,ARL14,SKIDA1,GEM,NR4A2,NFKBIA,NR4A1,NEURL4,NR4A3,IRF1,ADAM9,FOSB,IRF6,NFKBIE,BIRC3
86	MAFG	206.5	ARCHS4 Coexpression,105;Enrichr Queries,81;ReMap ChIP-seq,30;GTEx Coexpression,610	BTG2,ANKRD33B,CEBPD,SDC4,MEPCE,CXCL2,TANK,THBS1,ELK1,ICAM1,RELB,DUSP10,DPH3,NFKBIZ,LONP1,CD59,FAM71A,KLF10,BRD2,EGR2,JUN,HMGCS1,SKIDA1,NR4A2,NFKBIA,NR4A1,MTNR1A,NEURL4,PDIK1L,IRF1,ADAM9,FOSB,HSPA1B
87	RUNX1	207	Literature ChIP-seq,32;ARCHS4 Coexpression,834;Enrichr Queries,120;ReMap ChIP-seq,43;GTEx Coexpression,6	BTG2,CEBPD,SDC4,MEPCE,AMD1,TNFAIP2,THBS1,TANK,STX11,RELB,ICAM1,LYL1,DUSP10,TUBA1A,NUAK2,PLAU,NFKBIZ,LONP1,CD59,ZBED5,FAM71A,KLF10,JAG2,EGR2,JUN,EGR3,VDR,SKIDA1,TNFRSF9,PTBP3,NR4A2,NFKBIA,NR4A1,NEURL4,NR4A3,PDIK1L,IRF1,ADAM9,FOSB,NFKBIE
88	CREB3	208.3	ARCHS4 Coexpression,167;Enrichr Queries,295;ReMap ChIP-seq,80;GTEx Coexpression,291	KLF10,BTG2,JUN,CEBPD,SDC4,MEPCE,TNFAIP2,CXCL3,CXCL2,THBS1,PTBP3,ICAM1,NFKBIA,LYL1,NR4A1,DUSP10,TUBA1A,PDIK1L,IRF1,DPH3,CD59,IRF6,HSPA1B
89	ZNF165	209.8	ARCHS4 Coexpression,147;Enrichr Queries,21;ReMap ChIP-seq,293;GTEx Coexpression,378	BTG2,CEBPD,SDC4,CXCL1,CXCL2,THBS1,ICAM1,RELB,DUSP10,PLAU,NFKBIZ,LONP1,SMG7-AS1,KLF10,JUN,EGR3,HMGCS1,GEM,NR4A2,NFKBIA,NR4A3,ELF3,IRF1,FOSB,IRF6,BIRC3
90	BCL6	211.2	Literature ChIP-seq,85;ARCHS4 Coexpression,192;Enrichr Queries,32;ReMap ChIP-seq,38;GTEx Coexpression,709	BTG2,ANKRD33B,CEBPD,SDC4,MEPCE,TNFAIP2,CXCL2,THBS1,STX11,ICAM1,LYL1,NUAK2,DUSP10,NFKBIZ,LONP1,CD59,KLF10,JAG2,EGR2,JUN,EGR3,SKIDA1,TNFRSF9,GEM,NR4A2,NFKBIA,NR4A1,NEURL4,NR4A3,IRF1,FOSB,NFKBIE,BIRC3
91	EHF	212	ARCHS4 Coexpression,197;Enrichr Queries,131;ReMap ChIP-seq,208;GTEx Coexpression,312	BTG2,JUN,ARL14,CEBPD,SDC4,TNFAIP2,CXCL1,CXCL2,THBS1,ICAM1,NR4A2,ELF3,PLAU,NFKBIZ,ADAM9,IRF6,BIRC3
92	SREBF1	213.8	Literature ChIP-seq,148;ARCHS4 Coexpression,201;ENCODE ChIP-seq,93;Enrichr Queries,209;ReMap ChIP-seq,227;GTEx Coexpression,405	KLF10,JAG2,BTG2,JUN,SDC4,HMGCS1,CEBPD,UBE2G2,THBS1,ICAM1,NFKBIA,LYL1,NR4A1,NEURL4,TUBA1A,IRF1,LONP1,FOSB,SMG7-AS1,NFKBIE,HSPA1B
93	SON	215.5	ARCHS4 Coexpression,376;GTEx Coexpression,55	NR4A2,BRD2,UBE2G2,ZBED5
94	SKIL	219	ARCHS4 Coexpression,508;Enrichr Queries,92;GTEx Coexpression,57	KLF10,BTG2,EGR2,JUN,SDC4,THBS1,GEM,ICAM1,GULP1,NR4A2,NFKBIA,NR4A1,NR4A3,DUSP10,IRF1,NFKBIZ,LONP1,FOSB,BIRC3
95	SOX9	219.2	Literature ChIP-seq,45;ARCHS4 Coexpression,313;Enrichr Queries,199;ReMap ChIP-seq,117;GTEx Coexpression,422	BTG2,SDC4,CEBPD,MEPCE,TNFAIP2,TANK,THBS1,CXCL2,ELK1,ICAM1,RELB,PLAU,LONP1,SMG7-AS1,KLF10,BRD2,EGR2,JUN,EGR3,HMGCS1,GEM,NR4A2,NFKBIA,ELF3,IRF1,FOSB,NOL10,NFKBIE,BIRC3
96	GTF2B	221.8	ARCHS4 Coexpression,75;ENCODE ChIP-seq,22;ReMap ChIP-seq,158;GTEx Coexpression,632	KLF10,BTG2,JUN,SDC4,SKIDA1,MEPCE,ARHGAP5-AS1,CXCL3,TANK,STX11,NR4A2,NFKBIA,NEURL4,DUSP10,PDIK1L,IRF1,DPH3,FOSB,SMG7-AS1,CD59,NOL10,NFKBIE
97	TBP	222.4	Literature ChIP-seq,143;ARCHS4 Coexpression,465;ENCODE ChIP-seq,36;ReMap ChIP-seq,171;GTEx Coexpression,297	KLF10,NANOS1,BRD2,BTG2,SDC4,SKIDA1,MEPCE,UBE2G2,CXCL2,THBS1,ICAM1,NR4A2,NEURL4,NUAK2,NR4A3,SMG7-AS1,FOSB,CD59,NOL10,NFKBIE,ZBED5,HSPA1B
98	SMAD3	223.2	Literature ChIP-seq,6;ARCHS4 Coexpression,256;Enrichr Queries,155;ReMap ChIP-seq,73;GTEx Coexpression,626	BTG2,SDC4,CEBPD,THBS1,ICAM1,TUBA1A,NUAK2,DUSP10,PLAU,LONP1,CD59,ZBED5,KLF10,BRD2,JUN,EGR2,ARL14,VDR,GULP1,PTBP3,NFKBIA,NR4A3,ELF3,IRF1,ADAM9,FOSB,IRF6,BIRC3
99	KDM2B	226	ARCHS4 Coexpression,366;GTEx Coexpression,86	ANKRD33B,CD59,IRF6,NFKBIE,PTBP3
100	KLF5	226.4	Literature ChIP-seq,104;ARCHS4 Coexpression,84;Enrichr Queries,34;ReMap ChIP-seq,159;GTEx Coexpression,751	BTG2,SDC4,CEBPD,MEPCE,TNFAIP2,THBS1,ICAM1,DUSP10,PLAU,NFKBIZ,LONP1,KLF10,BRD2,EGR2,JUN,EGR3,GEM,PTBP3,NR4A2,NFKBIA,NR4A1,NEURL4,ELF3,IRF1,FOSB,TRIM15,IRF6,NFKBIE,BIRC3
101	TET3	227.3	ARCHS4 Coexpression,85;ReMap ChIP-seq,296;GTEx Coexpression,301	BRD2,BTG2,ANKRD33B,IRF6,PTBP3
102	CC2D1A	228.5	ARCHS4 Coexpression,118;GTEx Coexpression,339	JAG2,NEURL4,LONP1
103	FOXC2	231.7	ARCHS4 Coexpression,110;Enrichr Queries,243;GTEx Coexpression,342	EGR2,JUN,CEBPD,IRX3,TNFAIP2,THBS1,GEM,GULP1,ICAM1,NR4A2,NR4A1,PLAU,FOSB,ADAM9,CD59
104	SIX5	232	ARCHS4 Coexpression,391;ENCODE ChIP-seq,111;Enrichr Queries,242;ReMap ChIP-seq,277;GTEx Coexpression,139	BTG2,EGR2,JUN,EGR3,CEBPD,SDC4,IRX3,MEPCE,TNFAIP2,UBE2G2,THBS1,GULP1,NR4A1,NEURL4,ELF3,IRF1,LONP1,FOSB,NOL10
105	ZNF565	232.3	ARCHS4 Coexpression,264;Enrichr Queries,191;GTEx Coexpression,242	KLF10,BRD2,EGR2,JUN,EGR3,IRX3,THBS1,NR4A2,NR4A1,NEURL4,DUSP10,TUBA1A,DPH3,LONP1,FOSB,NOL10,BIRC3
106	MYC	232.8	Literature ChIP-seq,59;ARCHS4 Coexpression,1014;ENCODE ChIP-seq,48;Enrichr Queries,55;ReMap ChIP-seq,207;GTEx Coexpression,14	BTG2,ANKRD33B,CEBPD,SDC4,MEPCE,CXCL2,THBS1,TANK,ICAM1,IFIH1,LYL1,TUBA1A,DUSP10,PLAU,NFKBIZ,LONP1,KLF10,EGR2,JUN,EGR3,IRX3,SKIDA1,GEM,NR4A2,NFKBIA,NR4A1,NEURL4,NR4A3,IRF1,FOSB,IRF6,NFKBIE,BIRC3
107	TFEC	233	ARCHS4 Coexpression,58;Enrichr Queries,430;GTEx Coexpression,211	IFIH1,EGR2,JUN,CEBPD,PLAU,IRF1,TNFAIP2,CXCL3,THBS1,STX11,ICAM1,BIRC3
108	TAL1	234.7	Literature ChIP-seq,24;ARCHS4 Coexpression,753;ENCODE ChIP-seq,18;Enrichr Queries,165;ReMap ChIP-seq,138;GTEx Coexpression,310	BTG2,ANKRD33B,CEBPD,MEPCE,AMD1,TNFAIP2,THBS1,TANK,STX11,ICAM1,RELB,LYL1,DUSP10,LONP1,FAM71A,KLF10,JAG2,BRD2,JUN,EGR2,EGR3,UBE2G2,GEM,NR4A2,NR4A1,NEURL4,IRF1,FOSB,ADAM9,TRIM15,NOL10,NFKBIE,HSPA1B
109	GATA3	235.2	Literature ChIP-seq,106;ARCHS4 Coexpression,876;ENCODE ChIP-seq,19;Enrichr Queries,97;ReMap ChIP-seq,36;GTEx Coexpression,277	BTG2,ANKRD33B,SDC4,CEBPD,TANK,THBS1,CXCL2,ICAM1,DUSP10,NUAK2,PLAU,NFKBIZ,CD59,FAM71A,KLF10,JUN,EGR2,VDR,IRX3,GEM,GULP1,PTBP3,NR4A2,NFKBIA,NR4A1,ELF3,PDIK1L,IRF1,FOSB,ADAM9,IRF6,BIRC3
110	TFCP2L1	235.7	ARCHS4 Coexpression,94;Enrichr Queries,384;GTEx Coexpression,229	NR4A2,JAG2,NR4A1,BTG2,JUN,ELF3,CEBPD,SDC4,IRX3,FOSB,IRF6,THBS1
111	KLF2	236.8	Literature ChIP-seq,158;ARCHS4 Coexpression,724;Enrichr Queries,37;GTEx Coexpression,28	KLF10,JUN,BTG2,EGR2,EGR3,CEBPD,SDC4,CXCL2,THBS1,GEM,ICAM1,NR4A2,NFKBIA,NR4A1,TUBA1A,NR4A3,PDIK1L,PLAU,IRF1,NFKBIZ,LONP1,FOSB,BIRC3
112	KMT2B	237.5	ARCHS4 Coexpression,293;ReMap ChIP-seq,182	LYL1,BRD2,BTG2,NEURL4,LONP1,SMG7-AS1,NOL10,ICAM1
113	MAFB	237.5	ARCHS4 Coexpression,99;Enrichr Queries,49;ReMap ChIP-seq,129;GTEx Coexpression,673	BTG2,CEBPD,SDC4,TNFAIP2,CXCL2,THBS1,STX11,ICAM1,TUBA1A,NUAK2,PLAU,NFKBIZ,LONP1,KLF10,JUN,EGR2,EGR3,GEM,NR4A2,NFKBIA,NR4A1,IRF1,ADAM9,FOSB,IRF6,NFKBIE
114	FOXO1	238.6	Literature ChIP-seq,4;ARCHS4 Coexpression,281;Enrichr Queries,122;ReMap ChIP-seq,88;GTEx Coexpression,698	BTG2,SDC4,CEBPD,MEPCE,TANK,THBS1,ICAM1,LYL1,NUAK2,TUBA1A,NFKBIZ,LONP1,NANOS1,KLF10,BRD2,JUN,EGR2,EGR3,ARL14,IRX3,PTBP3,NFKBIA,NR4A2,NR4A1,NR4A3,PDIK1L,IRF1,FOSB,BIRC3
115	E2F6	238.8	ARCHS4 Coexpression,678;ENCODE ChIP-seq,60;Enrichr Queries,249;ReMap ChIP-seq,61;GTEx Coexpression,146	BTG2,CEBPD,MEPCE,AMD1,TNFAIP2,CXCL3,THBS1,ICAM1,LYL1,DUSP10,DPH3,LONP1,SMG7-AS1,NANOS1,JAG2,KLF10,BRD2,EGR2,JUN,EGR3,SKIDA1,UBE2G2,NR4A2,NFKBIA,NR4A1,NEURL4,IRF1,FOSB,NFKBIE,HSPA1B,BIRC3
116	NFATC1	243	ARCHS4 Coexpression,46;ENCODE ChIP-seq,45;Enrichr Queries,48;ReMap ChIP-seq,168;GTEx Coexpression,908	BTG2,CEBPD,SDC4,AMD1,TNFAIP2,THBS1,ELK1,TANK,STX11,ICAM1,RELB,TUBA1A,PLAU,NFKBIZ,LONP1,ZBED5,BRD2,EGR2,JUN,EGR3,GEM,NFKBIA,NR4A2,NR4A1,NR4A3,IRF1,FOSB,NFKBIE,BIRC3
117	ZNF263	243	Literature ChIP-seq,159;ARCHS4 Coexpression,83;ENCODE ChIP-seq,84;Enrichr Queries,340;ReMap ChIP-seq,279;GTEx Coexpression,513	JAG2,KLF10,BRD2,EGR2,JUN,ANKRD33B,EGR3,CEBPD,VDR,MEPCE,THBS1,NR4A2,NFKBIA,LYL1,NR4A1,NEURL4,IRF1,LONP1,FOSB,NFKBIE
118	BNC1	246	ARCHS4 Coexpression,101;Enrichr Queries,370;GTEx Coexpression,267	JAG2,EGR2,JUN,EGR3,SDC4,VDR,CXCL1,CXCL2,THBS1,GEM,PTBP3,PLAU,FOSB,ADAM9,IRF6
119	HNF4G	246	ARCHS4 Coexpression,372;ENCODE ChIP-seq,100;Enrichr Queries,398;ReMap ChIP-seq,161;GTEx Coexpression,199	BRD2,BTG2,EGR2,JUN,SDC4,CEBPD,HMGCS1,VDR,SKIDA1,THBS1,ICAM1,NR4A2,ELF3,IRF1,FOSB,TRIM15,NFKBIE,HSPA1B,BIRC3
120	HSF1	250	Literature ChIP-seq,75;ARCHS4 Coexpression,144;ENCODE ChIP-seq,117;ReMap ChIP-seq,223;GTEx Coexpression,691	JAG2,JUN,SDC4,MEPCE,UBE2G2,ELK1,LYL1,NEURL4,LONP1,SMG7-AS1,FOSB,NFKBIE,HSPA1B
121	BCL6B	251	ARCHS4 Coexpression,213;Enrichr Queries,465;GTEx Coexpression,75	JAG2,NR4A1,EGR2,JUN,NR4A3,CEBPD,PLAU,TNFAIP2,FOSB,CD59,THBS1,ICAM1
122	ZNF211	252.3	ARCHS4 Coexpression,474;Enrichr Queries,134;GTEx Coexpression,149	KLF10,BTG2,JUN,HMGCS1,THBS1,GEM,RELB,NR4A2,NFKBIA,NEURL4,DUSP10,TUBA1A,IRF1,NFKBIZ,LONP1,FOSB,ZBED5,BIRC3
123	ARID3A	254	ARCHS4 Coexpression,893;ENCODE ChIP-seq,101;Enrichr Queries,163;ReMap ChIP-seq,14;GTEx Coexpression,99	BTG2,SDC4,CEBPD,MEPCE,TNFAIP2,THBS1,STX11,ICAM1,DUSP10,PLAU,DPH3,LONP1,SMG7-AS1,CD59,BRD2,JUN,EGR2,TNFRSF9,SKIDA1,ARHGAP5-AS1,NR4A2,NFKBIA,NR4A1,NR4A3,IRF1,ADAM9,FOSB,NFKBIE,HSPA1B
124	ZBTB32	255	ARCHS4 Coexpression,37;Enrichr Queries,51;GTEx Coexpression,677	EGR2,JUN,EGR3,ANKRD33B,SDC4,TNFRSF9,TNFAIP2,ELK1,GEM,STX11,ICAM1,RELB,IFIH1,NR4A2,NFKBIA,NR4A1,NR4A3,IRF1,NFKBIZ,LONP1,SMG7-AS1,FOSB,NFKBIE,BIRC3
125	GATA2	255.3	Literature ChIP-seq,20;ARCHS4 Coexpression,730;ENCODE ChIP-seq,20;Enrichr Queries,314;ReMap ChIP-seq,50;GTEx Coexpression,398	BTG2,SDC4,CEBPD,AMD1,CXCL2,THBS1,TANK,STX11,ICAM1,LYL1,DUSP10,NFKBIZ,SMG7-AS1,CD59,ZBED5,FAM71A,KLF10,JUN,EGR2,ARL14,HMGCS1,GULP1,NR4A2,NFKBIA,NR4A1,ELF3,PDIK1L,IRF1,FOSB,ADAM9,IRF6,BIRC3
126	POU2F2	255.4	ARCHS4 Coexpression,877;ENCODE ChIP-seq,58;Enrichr Queries,74;ReMap ChIP-seq,52;GTEx Coexpression,216	BTG2,ANKRD33B,CEBPD,MEPCE,AMD1,TNFAIP2,CXCL1,CXCL2,THBS1,TANK,ICAM1,RELB,DUSP10,TUBA1A,PLAU,NFKBIZ,DPH3,LONP1,JAG2,BRD2,EGR2,JUN,HMGCS1,TNFRSF9,UBE2G2,NFKBIA,NR4A1,IRF1,FOSB,NOL10,NFKBIE,BIRC3
127	ESR1	257.3	Literature ChIP-seq,82;ARCHS4 Coexpression,630;ENCODE ChIP-seq,25;Enrichr Queries,307;ReMap ChIP-seq,148;GTEx Coexpression,352	KLF10,BTG2,EGR2,JUN,EGR3,SDC4,CEBPD,VDR,IRX3,TNFAIP2,CXCL1,TANK,THBS1,NFKBIA,NR4A2,NR4A1,NUAK2,TUBA1A,NR4A3,ELF3,IRF1,ZBED5
128	SPIB	259	ARCHS4 Coexpression,612;Enrichr Queries,174;ReMap ChIP-seq,144;GTEx Coexpression,106	BTG2,EGR2,JUN,MEPCE,TNFAIP2,THBS1,ICAM1,RELB,IFIH1,NR4A2,NFKBIA,NR4A1,NUAK2,IRF1,FOSB,ADAM9,NFKBIE,BIRC3
129	CREB1	260	Literature ChIP-seq,9;ARCHS4 Coexpression,113;ENCODE ChIP-seq,57;Enrichr Queries,826;ReMap ChIP-seq,176;GTEx Coexpression,379	BTG2,ANKRD33B,CEBPD,MEPCE,AMD1,THBS1,ICAM1,RELB,TUBA1A,NUAK2,DPH3,NFKBIZ,LONP1,ZBED5,KLF10,NANOS1,BRD2,JUN,EGR3,HMGCS1,VDR,SKIDA1,IRX3,GEM,PTBP3,NR4A2,NFKBIA,NR4A1,NEURL4,ELF3,IRF1,FOSB,NFKBIE,BIRC3
130	GPBP1L1	261.5	ARCHS4 Coexpression,423;GTEx Coexpression,100	BRD2,TUBA1A,IRF6,PTBP3
131	HOXA9	263	ARCHS4 Coexpression,525;Enrichr Queries,224;ReMap ChIP-seq,198;GTEx Coexpression,105	BTG2,EGR2,JUN,EGR3,SDC4,CEBPD,VDR,IRX3,TNFAIP2,CXCL2,THBS1,PTBP3,ICAM1,NR4A2,NR4A1,LYL1,DUSP10,NUAK2,IRF1,FOSB,IRF6,BIRC3
132	TFAP2C	263.5	Literature ChIP-seq,126;ARCHS4 Coexpression,780;ENCODE ChIP-seq,43;Enrichr Queries,239;ReMap ChIP-seq,153;GTEx Coexpression,240	BTG2,ANKRD33B,SDC4,CEBPD,AMD1,TNFAIP2,THBS1,NUAK2,PLAU,SMG7-AS1,CD59,ZBED5,KLF10,EGR2,JUN,EGR3,VDR,IRX3,UBE2G2,NR4A2,NFKBIA,NR4A1,NR4A3,ELF3,IRF1,FOSB,ADAM9,IRF6,BIRC3
133	BATF2	264	ARCHS4 Coexpression,51;Enrichr Queries,145;GTEx Coexpression,596	EGR2,TNFAIP2,CXCL1,CXCL3,CXCL2,THBS1,STX11,ICAM1,RELB,IFIH1,NFKBIA,IRF1,NFKBIZ,BIRC3
134	ZBTB38	265	ARCHS4 Coexpression,82;Enrichr Queries,583;GTEx Coexpression,130	KLF10,NFKBIA,BTG2,JUN,ANKRD33B,SDC4,DPH3,NFKBIZ,ADAM9,CD59,THBS1
135	ZNF281	266.3	ARCHS4 Coexpression,319;Enrichr Queries,192;GTEx Coexpression,288	KLF10,BTG2,JUN,HMGCS1,CEBPD,AMD1,TANK,THBS1,GULP1,NR4A2,NFKBIA,DUSP10,IRF1,LONP1,BIRC3
136	SCX	273	ARCHS4 Coexpression,273	JAG2,IRX3
137	NFE2L3	275.3	ARCHS4 Coexpression,173;Enrichr Queries,68;GTEx Coexpression,585	BTG2,EGR2,JUN,SDC4,AMD1,TNFAIP2,CXCL1,CXCL2,THBS1,PTBP3,ICAM1,RELB,GULP1,IFIH1,NR4A2,NFKBIA,PLAU,IRF1,NFKBIZ,FOSB,BIRC3
138	SOX11	278	Literature ChIP-seq,76;ARCHS4 Coexpression,127;Enrichr Queries,801;ReMap ChIP-seq,263;GTEx Coexpression,123	KLF10,BRD2,EGR2,JUN,BTG2,HMGCS1,SKIDA1,CXCL3,THBS1,RELB,NR4A2,NFKBIA,TUBA1A,NFKBIZ,FOSB,NFKBIE
139	SOX7	279	ARCHS4 Coexpression,603;Enrichr Queries,154;GTEx Coexpression,80	JAG2,BTG2,EGR2,JUN,CEBPD,IRX3,TNFAIP2,THBS1,PTBP3,ICAM1,NR4A2,NR4A1,NUAK2,NR4A3,PLAU,IRF1,FOSB,IRF6
140	KDM5B	280	Literature ChIP-seq,109;ARCHS4 Coexpression,200;ENCODE ChIP-seq,69;ReMap ChIP-seq,170;GTEx Coexpression,852	BTG2,ANKRD33B,TNFAIP2,ICAM1,LYL1,TUBA1A,PLAU,LONP1,JAG2,BRD2,JUN,HMGCS1,SKIDA1,IRX3,ARHGAP5-AS1,UBE2G2,PTBP3,GULP1,NR4A2,NFKBIA,NEURL4,IRF1,FOSB,ADAM9,NOL10,IRF6,NFKBIE
141	CREB3L1	280.5	ARCHS4 Coexpression,210;Enrichr Queries,366;ReMap ChIP-seq,85;GTEx Coexpression,461	BTG2,JUN,CEBPD,SDC4,MEPCE,TNFAIP2,THBS1,ICAM1,NR4A2,LYL1,NR4A1,PLAU,IRF1,LONP1,ADAM9,FOSB,NFKBIE,HSPA1B
142	FOXS1	281.7	ARCHS4 Coexpression,245;Enrichr Queries,281;GTEx Coexpression,319	BTG2,EGR2,JUN,CEBPD,SDC4,TNFAIP2,THBS1,ELK1,GEM,GULP1,NR4A1,PLAU,FOSB
143	PPARD	282.5	Literature ChIP-seq,53;ARCHS4 Coexpression,307;Enrichr Queries,101;GTEx Coexpression,669	BTG2,ANKRD33B,CEBPD,SDC4,TNFAIP2,THBS1,TANK,ICAM1,RELB,IFIH1,NUAK2,DUSP10,PLAU,NFKBIZ,LONP1,ZBED5,KLF10,NANOS1,JUN,VDR,NR4A2,NFKBIA,NR4A1,NR4A3,IRF1,FOSB,NFKBIE,BIRC3
144	ZBTB5	289.3	ARCHS4 Coexpression,470;Enrichr Queries,119;GTEx Coexpression,279	KLF10,BRD2,BTG2,JUN,HMGCS1,SDC4,THBS1,PTBP3,ICAM1,NR4A2,NFKBIA,NR4A1,IRF1,NFKBIZ,LONP1,IRF6,BIRC3
145	HLX	289.3	ARCHS4 Coexpression,100;Enrichr Queries,85;GTEx Coexpression,683	BTG2,EGR2,JUN,CEBPD,TNFAIP2,CXCL2,THBS1,STX11,ICAM1,RELB,NR4A2,NFKBIA,NR4A1,DUSP10,PLAU,IRF1,NFKBIZ,LONP1,FOSB
146	KLF3	290.3	ARCHS4 Coexpression,291;Enrichr Queries,339;ReMap ChIP-seq,257;GTEx Coexpression,274	KLF10,JUN,BTG2,CEBPD,SDC4,ARHGAP5-AS1,THBS1,STX11,PTBP3,NR4A2,NFKBIA,PDIK1L,IRF1,NFKBIZ,LONP1,SMG7-AS1,IRF6
147	DACH1	291.7	Literature ChIP-seq,116;ARCHS4 Coexpression,199;Enrichr Queries,560	BTG2,EGR2,JUN,HMGCS1,SDC4,SKIDA1,MEPCE,UBE2G2,THBS1,NR4A2,NR4A1,NR4A3,TUBA1A,DPH3,FOSB,HSPA1B
148	ZNF883	292.5	ARCHS4 Coexpression,239;GTEx Coexpression,346	NR4A2,TUBA1A,GULP1
149	RUNX3	293.6	ARCHS4 Coexpression,974;ENCODE ChIP-seq,114;Enrichr Queries,75;ReMap ChIP-seq,18;GTEx Coexpression,287	BTG2,ANKRD33B,CEBPD,AMD1,TNFAIP2,ELK1,THBS1,STX11,ICAM1,DUSP10,PLAU,NFKBIZ,LONP1,BRD2,EGR2,JUN,EGR3,TNFRSF9,UBE2G2,NFKBIA,NR4A2,NR4A1,NR4A3,IRF1,FOSB,NFKBIE,HSPA1B,BIRC3
150	RFX8	296	ARCHS4 Coexpression,154;GTEx Coexpression,438	ADAM9,FOSB,CD59,CXCL3
151	TGIF1	301	ARCHS4 Coexpression,583;Enrichr Queries,44;GTEx Coexpression,276	KLF10,BTG2,EGR2,JUN,CEBPD,SDC4,TNFAIP2,CXCL2,THBS1,GEM,ICAM1,GULP1,NR4A2,NFKBIA,NR4A1,DUSP10,PLAU,IRF1,NFKBIZ,LONP1,FOSB,BIRC3
152	ELK1	303.2	Literature ChIP-seq,41;ARCHS4 Coexpression,315;ENCODE ChIP-seq,70;ReMap ChIP-seq,135;GTEx Coexpression,955	JUN,EGR2,EGR3,HMGCS1,ARL14,AMD1,UBE2G2,ELK1,THBS1,ICAM1,LYL1,NR4A1,NEURL4,NR4A3,PLAU,LONP1,FOSB,SMG7-AS1,ADAM9,NOL10,NFKBIE,HSPA1B,BIRC3
153	IRF5	303.7	ARCHS4 Coexpression,395;Enrichr Queries,217;GTEx Coexpression,299	BTG2,EGR2,JUN,CEBPD,TNFAIP2,CXCL2,THBS1,ICAM1,IFIH1,NFKBIA,PLAU,IRF1,LONP1,NFKBIE
154	HBP1	303.8	ARCHS4 Coexpression,33;Enrichr Queries,193;ReMap ChIP-seq,156;GTEx Coexpression,833	KLF10,BRD2,JUN,BTG2,SDC4,HMGCS1,CEBPD,SKIDA1,CXCL3,THBS1,TANK,STX11,NR4A2,NFKBIA,NEURL4,TUBA1A,DUSP10,IRF1,NFKBIZ,LONP1,FOSB,NFKBIE,HSPA1B
155	ZBTB2	304.7	ARCHS4 Coexpression,128;Enrichr Queries,164;GTEx Coexpression,622	KLF10,BRD2,BTG2,EGR2,JUN,AMD1,TANK,THBS1,PTBP3,RELB,NR4A2,NFKBIA,NR4A1,DUSP10,IRF1,NFKBIZ,LONP1,FOSB
156	ARID5B	305.3	ARCHS4 Coexpression,132;Enrichr Queries,100;GTEx Coexpression,684	KLF10,BTG2,EGR2,JUN,CEBPD,SDC4,TANK,THBS1,ICAM1,NR4A2,NFKBIA,NR4A1,NEURL4,DUSP10,IRF1,NFKBIZ,LONP1,FOSB,CD59,BIRC3
157	IRX2	305.7	ARCHS4 Coexpression,387;Enrichr Queries,448;GTEx Coexpression,82	NR4A2,NR4A1,BTG2,EGR2,JUN,TUBA1A,SDC4,IRX3,FOSB,IRF6,THBS1
158	ZNF799	306.7	ARCHS4 Coexpression,463;Enrichr Queries,298;GTEx Coexpression,159	BTG2,EGR2,JUN,HMGCS1,TANK,THBS1,STX11,ICAM1,NR4A2,NR4A1,NEURL4,NFKBIZ,LONP1,FOSB
159	ZNF433	308	ARCHS4 Coexpression,218;Enrichr Queries,563;GTEx Coexpression,143	IFIH1,NR4A1,BTG2,JUN,NEURL4,EGR3,TUBA1A,SMG7-AS1,FOSB,FSCN3,THBS1,ICAM1
160	TWIST2	310	ARCHS4 Coexpression,494;GTEx Coexpression,126	ADAM9,THBS1
161	ZNF275	311	ARCHS4 Coexpression,47;Enrichr Queries,456;GTEx Coexpression,430	KLF10,BRD2,BTG2,JUN,ANKRD33B,HMGCS1,THBS1,ELK1,ICAM1,NR4A1,NEURL4,IRF1,LONP1,BIRC3
162	IRX1	311.3	ARCHS4 Coexpression,188;Enrichr Queries,719;GTEx Coexpression,27	NR4A2,NR4A1,JUN,EGR2,EGR3,TUBA1A,HMGCS1,IRX3,NFKBIZ,TANK,THBS1
163	CDX1	312.3	ARCHS4 Coexpression,189;Enrichr Queries,488;GTEx Coexpression,260	NR4A1,BTG2,EGR2,JUN,ELF3,VDR,IRF1,TRIM15,IRF6,THBS1
164	PBX4	314	ARCHS4 Coexpression,103;Enrichr Queries,53;GTEx Coexpression,786	BRD2,BTG2,EGR2,JUN,EGR3,CEBPD,SDC4,TNFAIP2,CXCL2,THBS1,GEM,ICAM1,RELB,NR4A2,NFKBIA,NR4A1,NR4A3,IRF1,LONP1,FOSB,BIRC3
165	SNAI2	314	ARCHS4 Coexpression,108;Enrichr Queries,553;ReMap ChIP-seq,192;GTEx Coexpression,403	JAG2,BTG2,EGR2,JUN,CEBPD,SDC4,THBS1,GEM,NEURL4,NUAK2,PLAU,LONP1,ADAM9,CD59,IRF6,NFKBIE,FAM71A
166	GRHL2	314.2	Literature ChIP-seq,93;ARCHS4 Coexpression,166;Enrichr Queries,958;ReMap ChIP-seq,120;GTEx Coexpression,234	KLF10,NANOS1,JUN,SDC4,CEBPD,IRX3,TNFAIP2,THBS1,ICAM1,NFKBIA,NR4A2,NR4A1,NUAK2,ELF3,PLAU,NFKBIZ,IRF6
167	HES5	316.7	ARCHS4 Coexpression,370;Enrichr Queries,128;GTEx Coexpression,452	BTG2,EGR2,JUN,EGR3,CEBPD,HMGCS1,IRX3,CXCL2,THBS1,GEM,ICAM1,NR4A2,NR4A1,NR4A3,NUAK2,PLAU,FOSB
168	STAT4	317.8	Literature ChIP-seq,10;ARCHS4 Coexpression,44;Enrichr Queries,90;GTEx Coexpression,1127	BRD2,BTG2,EGR2,JUN,CEBPD,SDC4,TNFRSF9,IRX3,CXCL1,CXCL2,THBS1,GEM,STX11,ICAM1,RELB,PTBP3,IFIH1,NR4A2,NFKBIA,PLAU,IRF1,NFKBIZ,FOSB,BIRC3
169	ZBTB1	319.7	ARCHS4 Coexpression,672;Enrichr Queries,93;GTEx Coexpression,194	KLF10,BTG2,EGR2,JUN,ANKRD33B,HMGCS1,CEBPD,THBS1,IFIH1,NR4A2,NFKBIA,NR4A1,DUSP10,NR4A3,IRF1,NFKBIZ,LONP1,FOSB,BIRC3
170	ZNF589	323.5	ARCHS4 Coexpression,152;Enrichr Queries,304;ReMap ChIP-seq,62;GTEx Coexpression,776	BRD2,BTG2,EGR2,JUN,SDC4,CEBPD,VDR,MEPCE,CXCL1,CXCL3,CXCL2,THBS1,ICAM1,GULP1,NFKBIA,DUSP10,PDIK1L,PLAU,IRF1,ADAM9,CD59,ZBED5,FAM71A,HSPA1B
171	GMEB2	325.7	ARCHS4 Coexpression,290;Enrichr Queries,515;GTEx Coexpression,172	KLF10,BRD2,BTG2,EGR2,JUN,NEURL4,ANKRD33B,IRF1,MEPCE,LONP1,ICAM1
172	POU3F2	326	Literature ChIP-seq,114;ARCHS4 Coexpression,204;Enrichr Queries,665;GTEx Coexpression,321	EGR2,JUN,EGR3,HMGCS1,IRX3,SKIDA1,AMD1,THBS1,GULP1,NR4A2,NR4A3,TUBA1A,DPH3,ADAM9,BIRC3
173	FOXI1	326	ARCHS4 Coexpression,403;Enrichr Queries,289;GTEx Coexpression,286	EGR2,JUN,SDC4,CEBPD,VDR,IRX3,NR4A2,NR4A1,NR4A3,ELF3,PLAU,IRF1,FOSB,IRF6,NFKBIE
174	ZNF35	326.7	ARCHS4 Coexpression,68;Enrichr Queries,110;GTEx Coexpression,802	KLF10,BTG2,EGR2,JUN,HMGCS1,CEBPD,ARL14,VDR,THBS1,ICAM1,GULP1,NR4A2,NFKBIA,NR4A1,PLAU,IRF1,DPH3,LONP1,FOSB,NOL10
175	ZNF274	327.3	Literature ChIP-seq,155;ARCHS4 Coexpression,916;ENCODE ChIP-seq,56;Enrichr Queries,112;ReMap ChIP-seq,255;GTEx Coexpression,470	KLF10,BTG2,EGR2,JUN,HMGCS1,CEBPD,AMD1,THBS1,PTBP3,ICAM1,RELB,NFKBIA,NR4A2,LYL1,NR4A1,PLAU,IRF1,NFKBIZ,LONP1,FOSB,NFKBIE,ZBED5
176	ZNF394	329	ARCHS4 Coexpression,76;Enrichr Queries,115;GTEx Coexpression,796	KLF10,BRD2,BTG2,JUN,CEBPD,THBS1,STX11,RELB,NR4A2,NFKBIA,TUBA1A,IRF1,NFKBIZ,LONP1,FOSB,HSPA1B,BIRC3
177	HES1	329.8	ARCHS4 Coexpression,758;Enrichr Queries,54;ReMap ChIP-seq,285;GTEx Coexpression,222	KLF10,JUN,BTG2,EGR2,EGR3,CEBPD,SDC4,IRX3,CXCL2,THBS1,GEM,ICAM1,NR4A2,NFKBIA,NR4A1,PLAU,IRF1,NFKBIZ,LONP1,FOSB,IRF6
178	SAFB2	330.5	ARCHS4 Coexpression,287;GTEx Coexpression,374	BRD2,NEURL4
179	ZSCAN4	331	ARCHS4 Coexpression,687;Enrichr Queries,223;GTEx Coexpression,83	JAG2,EGR2,JUN,EGR3,IRX3,AMD1,THBS1,RELB,NR4A2,NR4A1,NR4A3,ELF3,IRF1,FOSB,IRF6,BIRC3
180	NFYB	331.6	ARCHS4 Coexpression,675;ENCODE ChIP-seq,13;Enrichr Queries,511;ReMap ChIP-seq,128;GTEx Coexpression,331	BTG2,AMD1,MEPCE,ELK1,THBS1,DUSP10,NUAK2,DPH3,LONP1,SMG7-AS1,ZBED5,KLF10,BRD2,JUN,HMGCS1,ARL14,ARHGAP5-AS1,PTBP3,GULP1,NFKBIA,NR4A1,NEURL4,NR4A3,ELF3,PDIK1L,IRF1,FOSB,HSPA1B
181	ZNF697	331.7	ARCHS4 Coexpression,901;Enrichr Queries,33;GTEx Coexpression,61	BTG2,SDC4,TNFAIP2,CXCL3,THBS1,CXCL2,ICAM1,RELB,DUSP10,PLAU,NFKBIZ,LONP1,KLF10,EGR2,JUN,EGR3,GEM,NR4A2,NFKBIA,IRF1,ADAM9,FOSB,NOL10,BIRC3
182	ZNF436	332	ARCHS4 Coexpression,205;Enrichr Queries,183;GTEx Coexpression,608	KLF10,BTG2,EGR2,JUN,HMGCS1,CEBPD,SDC4,THBS1,NR4A2,NFKBIA,NR4A1,TUBA1A,IRF1,ADAM9,IRF6
183	BHLHE41	332	ARCHS4 Coexpression,191;GTEx Coexpression,473	EGR2,TUBA1A,EGR3,NR4A3
184	IRX4	332.7	ARCHS4 Coexpression,180;Enrichr Queries,579;GTEx Coexpression,239	NR4A2,JAG2,EGR2,EGR3,ELF3,IRX3,FOSB,IRF6,THBS1
185	E2F3	333	ARCHS4 Coexpression,340;Enrichr Queries,574;GTEx Coexpression,85	BTG2,EGR2,JUN,MEPCE,TANK,THBS1,STX11,PTBP3,NFKBIA,PLAU,IRF1,DPH3,LONP1
186	ATF4	335.5	ARCHS4 Coexpression,86;Enrichr Queries,487;ReMap ChIP-seq,252;GTEx Coexpression,517	BRD2,EGR2,BTG2,JUN,HMGCS1,SDC4,MEPCE,UBE2G2,CXCL3,NFKBIA,NEURL4,TUBA1A,IRF1,LONP1,FAM71A
187	HMX3	336	ARCHS4 Coexpression,52;Enrichr Queries,878;GTEx Coexpression,78	IFIH1,NR4A2,NR4A1,BRD2,EGR2,ANKRD33B,EGR3,IRX3,LONP1,NFKBIE,ELK1
188	GFI1B	337	Literature ChIP-seq,26;ARCHS4 Coexpression,500;Enrichr Queries,345;ReMap ChIP-seq,126;GTEx Coexpression,688	NANOS1,JAG2,BTG2,EGR2,JUN,CEBPD,VDR,MEPCE,TNFAIP2,UBE2G2,THBS1,ELK1,GEM,ICAM1,NR4A2,LYL1,NR4A1,NUAK2,PDIK1L,IRF1,LONP1,FOSB,NOL10,NFKBIE
189	EPAS1	337.8	ARCHS4 Coexpression,697;Enrichr Queries,376;ReMap ChIP-seq,191;GTEx Coexpression,87	BTG2,JUN,ANKRD33B,CEBPD,SDC4,THBS1,ICAM1,NFKBIA,NR4A2,NR4A1,NUAK2,NR4A3,ELF3,IRF1,CD59
190	TCF7	338.2	Literature ChIP-seq,108;ARCHS4 Coexpression,619;Enrichr Queries,169;ReMap ChIP-seq,87;GTEx Coexpression,708	BTG2,CEBPD,ELK1,TANK,THBS1,STX11,ICAM1,LYL1,DUSP10,NFKBIZ,LONP1,JAG2,BRD2,EGR2,JUN,EGR3,TNFRSF9,UBE2G2,GEM,NFKBIA,NR4A2,NR4A1,IRF1,FOSB,NOL10,NFKBIE,HSPA1B,BIRC3
191	FOXL2	339	ARCHS4 Coexpression,150;Enrichr Queries,441;GTEx Coexpression,426	EGR2,JUN,EGR3,IRX3,THBS1,ELK1,NR4A2,NR4A1,NR4A3,PLAU,LONP1,FOSB,IRF6
192	HOXB5	339.7	ARCHS4 Coexpression,288;Enrichr Queries,469;GTEx Coexpression,262	NR4A2,BTG2,EGR2,JUN,CEBPD,VDR,PLAU,IRX3,FOSB,TRIM15,CD59,THBS1
193	TWIST1	342.8	ARCHS4 Coexpression,552;Enrichr Queries,399;ReMap ChIP-seq,79;GTEx Coexpression,341	KLF10,BTG2,EGR2,JUN,ANKRD33B,EGR3,CEBPD,SKIDA1,IRX3,TNFAIP2,THBS1,GEM,NR4A2,LYL1,NR4A3,PLAU,ADAM9,FOSB,NFKBIE,FAM71A
194	USF2	342.8	ARCHS4 Coexpression,636;ENCODE ChIP-seq,39;Enrichr Queries,594;ReMap ChIP-seq,96;GTEx Coexpression,349	BTG2,SDC4,CEBPD,MEPCE,ELK1,STX11,ICAM1,RELB,LYL1,NUAK2,TUBA1A,PLAU,LONP1,KLF10,BRD2,JUN,EGR2,GEM,NR4A2,NFKBIA,NR4A1,NEURL4,ELF3,IRF1,FOSB
195	TP73	347.3	ARCHS4 Coexpression,91;Enrichr Queries,467;GTEx Coexpression,484	JAG2,BTG2,EGR2,JUN,EGR3,ANKRD33B,CEBPD,VDR,THBS1,ELK1,NR4A1,PLAU,IRF6
196	ZFY	347.7	ARCHS4 Coexpression,396;Enrichr Queries,61;GTEx Coexpression,586	BTG2,EGR2,JUN,EGR3,HMGCS1,CEBPD,CXCL1,CXCL2,THBS1,GEM,ICAM1,NR4A2,NR4A1,NR4A3,PLAU,NFKBIZ,FOSB,NOL10,BIRC3
197	FOXD1	350	ARCHS4 Coexpression,271;GTEx Coexpression,429	ADAM9,THBS1
198	HOXA13	356.7	ARCHS4 Coexpression,368;Enrichr Queries,178;GTEx Coexpression,524	BRD2,BTG2,EGR2,JUN,EGR3,VDR,IRX3,AMD1,THBS1,ICAM1,NR4A2,NR4A1,NR4A3,PLAU,BIRC3
199	IKZF3	356.7	ARCHS4 Coexpression,581;Enrichr Queries,457;GTEx Coexpression,32	BTG2,EGR2,JUN,ANKRD33B,TNFRSF9,THBS1,ICAM1,IFIH1,IRF1,NFKBIZ,NFKBIE,BIRC3
200	CREB3L2	357.7	ARCHS4 Coexpression,566;Enrichr Queries,387;GTEx Coexpression,120	NR4A2,KLF10,NFKBIA,BTG2,JUN,CEBPD,SDC4,LONP1,FOSB,ADAM9,THBS1,GULP1
201	SREBF2	357.8	Literature ChIP-seq,132;ARCHS4 Coexpression,220;ENCODE ChIP-seq,88;Enrichr Queries,516;ReMap ChIP-seq,256;GTEx Coexpression,935	JAG2,BRD2,BTG2,JUN,HMGCS1,SDC4,TNFAIP2,UBE2G2,THBS1,GEM,NFKBIA,LYL1,NR4A1,NEURL4,TUBA1A,IRF1,LONP1,FOSB
202	IRF2	358	ARCHS4 Coexpression,421;Enrichr Queries,71;ReMap ChIP-seq,98;GTEx Coexpression,842	BTG2,CEBPD,SDC4,MEPCE,TNFAIP2,THBS1,STX11,ICAM1,RELB,IFIH1,LYL1,DUSP10,NFKBIZ,LONP1,KLF10,BRD2,JUN,NR4A2,NFKBIA,NR4A1,IRF1,FOSB,NFKBIE,HSPA1B,BIRC3
203	ZNF683	358.7	ARCHS4 Coexpression,389;Enrichr Queries,534;GTEx Coexpression,153	NR4A2,EGR2,JUN,IRF1,TNFRSF9,SMG7-AS1,FOSB,FSCN3,THBS1,FAM71A,BIRC3
204	KLF9	361.5	ARCHS4 Coexpression,456;Enrichr Queries,88;ReMap ChIP-seq,113;GTEx Coexpression,789	JAG2,KLF10,JUN,BTG2,EGR2,CEBPD,SDC4,SKIDA1,TNFAIP2,THBS1,ICAM1,NR4A2,NFKBIA,LYL1,NR4A1,NEURL4,TUBA1A,NR4A3,IRF1,NFKBIZ,LONP1,FOSB
205	MAFF	362.8	ARCHS4 Coexpression,1623;ENCODE ChIP-seq,78;Enrichr Queries,4;ReMap ChIP-seq,101;GTEx Coexpression,8	BTG2,ANKRD33B,CEBPD,SDC4,AMD1,TNFAIP2,CXCL1,CXCL3,CXCL2,THBS1,ICAM1,RELB,DUSP10,PLAU,NFKBIZ,DPH3,LONP1,SMG7-AS1,KLF10,BRD2,JUN,EGR2,EGR3,HMGCS1,SKIDA1,GEM,NFKBIA,NR4A2,NR4A1,NR4A3,ELF3,IRF1,ADAM9,FOSB,NOL10,HSPA1B,BIRC3
206	ELF3	365	ARCHS4 Coexpression,379;Enrichr Queries,69;ReMap ChIP-seq,11;GTEx Coexpression,1001	BTG2,SDC4,CEBPD,TNFAIP2,CXCL1,CXCL3,CXCL2,TANK,THBS1,ICAM1,DUSP10,NUAK2,PLAU,NFKBIZ,LONP1,JUN,ARHGAP5-AS1,NFKBIA,NR4A1,ELF3,IRF1,ADAM9,FOSB,TRIM15,IRF6,BIRC3
207	NR1H3	365.6	Literature ChIP-seq,77;ARCHS4 Coexpression,170;Enrichr Queries,94;ReMap ChIP-seq,225;GTEx Coexpression,1262	BTG2,CEBPD,SDC4,TNFAIP2,TANK,THBS1,STX11,ICAM1,IFIH1,LYL1,TUBA1A,PLAU,LONP1,EGR2,JUN,HMGCS1,VDR,NFKBIA,NR4A2,NR4A1,IRF1,ADAM9,FOSB,NFKBIE,BIRC3
208	SP6	366.3	ARCHS4 Coexpression,712;Enrichr Queries,107;GTEx Coexpression,280	JAG2,BTG2,EGR2,JUN,EGR3,CEBPD,SDC4,VDR,IRX3,THBS1,ICAM1,NR4A2,NR4A1,ELF3,PLAU,FOSB,IRF6
209	SMAD1	369.8	Literature ChIP-seq,102;ARCHS4 Coexpression,588;Enrichr Queries,188;ReMap ChIP-seq,160;GTEx Coexpression,811	KLF10,BTG2,JUN,CEBPD,SDC4,MEPCE,THBS1,ICAM1,NFKBIA,LYL1,NR4A1,TUBA1A,IRF1,NFKBIZ,LONP1,FOSB,NFKBIE
210	ERF	370.3	ARCHS4 Coexpression,402;Enrichr Queries,67;GTEx Coexpression,642	KLF10,BRD2,BTG2,EGR2,JUN,EGR3,CEBPD,SDC4,THBS1,ICAM1,RELB,NR4A2,NFKBIA,NR4A1,NEURL4,NR4A3,PDIK1L,IRF1,LONP1,FOSB
211	LHX2	371.5	ARCHS4 Coexpression,677;Enrichr Queries,365;ReMap ChIP-seq,84;GTEx Coexpression,360	JUN,BTG2,EGR2,EGR3,ARL14,SDC4,CXCL1,THBS1,GEM,PTBP3,GULP1,NR4A2,NR4A1,DUSP10,NR4A3,TUBA1A,PLAU,ADAM9,FOSB
212	EGR4	372	ARCHS4 Coexpression,95;Enrichr Queries,57;GTEx Coexpression,964	KLF10,BTG2,EGR2,JUN,ANKRD33B,EGR3,CEBPD,SDC4,THBS1,GEM,ICAM1,NR4A2,NFKBIA,NR4A1,DUSP10,NR4A3,NFKBIZ,LONP1,FOSB
213	POU3F1	372.5	Literature ChIP-seq,31;ARCHS4 Coexpression,404;Enrichr Queries,278;GTEx Coexpression,777	JAG2,BTG2,EGR2,JUN,EGR3,IRX3,SKIDA1,MEPCE,THBS1,PTBP3,RELB,NR4A2,IFIH1,NR4A1,NR4A3,TUBA1A,ELF3,PLAU,IRF1,LONP1,FOSB,IRF6
214	ZUP1	373	ARCHS4 Coexpression,524;Enrichr Queries,348;GTEx Coexpression,247	BTG2,JUN,THBS1,TANK,STX11,PTBP3,IFIH1,NFKBIA,IRF1,NFKBIZ,DPH3,LONP1,NFKBIE,BIRC3
215	MYNN	373.8	ARCHS4 Coexpression,526;Enrichr Queries,524;ReMap ChIP-seq,147;GTEx Coexpression,298	KLF10,BRD2,BTG2,JUN,MEPCE,TANK,ICAM1,PTBP3,NR4A2,NFKBIA,LYL1,NEURL4,IRF1,NFKBIZ,LONP1,FOSB,NOL10,NFKBIE,HSPA1B
216	ATF5	374.3	ARCHS4 Coexpression,45;Enrichr Queries,105;GTEx Coexpression,973	BTG2,EGR2,JUN,ANKRD33B,HMGCS1,CEBPD,SDC4,TNFAIP2,THBS1,ICAM1,RELB,NFKBIA,IFIH1,NR4A1,TUBA1A,IRF1,LONP1,FOSB,NFKBIE
217	OSR1	376	ARCHS4 Coexpression,207;GTEx Coexpression,545	CD59,GEM,FAM71A
218	DLX4	376.5	Literature ChIP-seq,164;ARCHS4 Coexpression,339;Enrichr Queries,279;GTEx Coexpression,724	JAG2,BTG2,EGR2,JUN,EGR3,CEBPD,IRX3,THBS1,NR4A2,NR4A1,ELF3,LONP1,FOSB,IRF6
219	GABPA	377.2	Literature ChIP-seq,152;ARCHS4 Coexpression,125;ENCODE ChIP-seq,71;Enrichr Queries,1351;ReMap ChIP-seq,248;GTEx Coexpression,316	JUN,MEPCE,AMD1,UBE2G2,TANK,STX11,PTBP3,LYL1,NEURL4,PDIK1L,DPH3,LONP1,FOSB,SMG7-AS1,NOL10,NFKBIE
220	ZNF217	377.8	Literature ChIP-seq,25;ARCHS4 Coexpression,920;ENCODE ChIP-seq,74;Enrichr Queries,286;ReMap ChIP-seq,236;GTEx Coexpression,726	KLF10,BTG2,JUN,SDC4,CEBPD,ARL14,MEPCE,UBE2G2,TANK,THBS1,GEM,PTBP3,GULP1,NFKBIA,NR4A2,TUBA1A,NR4A3,DUSP10,ELF3,PDIK1L,IRF1,NFKBIZ,LONP1
221	MAF	378.8	ARCHS4 Coexpression,509;Enrichr Queries,146;ReMap ChIP-seq,173;GTEx Coexpression,687	JAG2,BTG2,EGR2,JUN,CEBPD,TNFRSF9,THBS1,GEM,ICAM1,NFKBIA,NR4A2,NR4A1,NEURL4,PLAU,IRF1,LONP1,FOSB,IRF6,FAM71A
222	FLI1	378.8	Literature ChIP-seq,34;ARCHS4 Coexpression,787;ENCODE ChIP-seq,112;Enrichr Queries,672;ReMap ChIP-seq,134;GTEx Coexpression,534	JAG2,BTG2,JUN,EGR2,MEPCE,AMD1,THBS1,CXCL2,ELK1,TANK,STX11,ICAM1,IFIH1,LYL1,NR4A1,NEURL4,IRF1,DPH3,FOSB,NOL10,NFKBIE
223	POU2AF1	379.5	ARCHS4 Coexpression,714;GTEx Coexpression,45	IFIH1,ANKRD33B,NFKBIE,FAM71A,BIRC3
224	IRX5	382	ARCHS4 Coexpression,375;Enrichr Queries,498;GTEx Coexpression,273	NR4A2,JAG2,BTG2,EGR2,JUN,EGR3,CEBPD,IRX3,FOSB,IRF6,THBS1
225	ZNF324B	383	ARCHS4 Coexpression,87;GTEx Coexpression,679	BRD2,NEURL4,MEPCE,LONP1,NOL10
226	TEAD4	384.2	Literature ChIP-seq,120;ARCHS4 Coexpression,856;ENCODE ChIP-seq,10;Enrichr Queries,382;ReMap ChIP-seq,13;GTEx Coexpression,924	ANKRD33B,SDC4,CEBPD,TNFAIP2,CXCL1,THBS1,TANK,ICAM1,NUAK2,PLAU,LONP1,ZBED5,JUN,EGR2,HMGCS1,SKIDA1,UBE2G2,GULP1,PTBP3,NFKBIA,NR4A1,NR4A3,ELF3,PDIK1L,IRF1,FOSB,NFKBIE,HSPA1B
227	DLX5	384.7	ARCHS4 Coexpression,309;Enrichr Queries,561;GTEx Coexpression,284	NR4A2,BTG2,EGR2,JUN,EGR3,TUBA1A,PDIK1L,IRX3,FOSB,IRF6,THBS1
228	ZNF792	385.3	ARCHS4 Coexpression,325;Enrichr Queries,254;GTEx Coexpression,577	BTG2,JUN,CEBPD,MEPCE,THBS1,STX11,ICAM1,IFIH1,NFKBIA,LYL1,DUSP10,PLAU,IRF1,LONP1,BIRC3
229	ZNF277	385.7	ARCHS4 Coexpression,514;Enrichr Queries,610;GTEx Coexpression,33	BTG2,JUN,ANKRD33B,HMGCS1,AMD1,TANK,THBS1,IFIH1,NFKBIA,NEURL4,TUBA1A,LONP1
230	CASZ1	386.7	ARCHS4 Coexpression,176;Enrichr Queries,734;GTEx Coexpression,250	NR4A2,JAG2,BTG2,JUN,DUSP10,EGR3,ELF3,IRX3,IRF6,THBS1
231	HOXA6	387	ARCHS4 Coexpression,277;Enrichr Queries,141;GTEx Coexpression,743	BRD2,BTG2,EGR2,JUN,EGR3,VDR,IRX3,CXCL2,THBS1,ICAM1,NR4A2,NEURL4,NR4A3,PLAU,IRF1,FOSB
232	HNF4A	387.3	Literature ChIP-seq,61;ARCHS4 Coexpression,918;ENCODE ChIP-seq,73;Enrichr Queries,309;ReMap ChIP-seq,246;GTEx Coexpression,717	SDC4,CEBPD,MEPCE,THBS1,CXCL2,ICAM1,IFIH1,LYL1,NUAK2,SMG7-AS1,BRD2,EGR2,JUN,HMGCS1,VDR,SKIDA1,UBE2G2,GULP1,NFKBIA,NR4A1,ELF3,IRF1,ADAM9,TRIM15,IRF6
233	ZNF703	387.3	ARCHS4 Coexpression,146;Enrichr Queries,244;GTEx Coexpression,772	KLF10,BRD2,BTG2,JUN,EGR3,CEBPD,SDC4,IRX3,MEPCE,THBS1,NR4A2,NR4A1,NEURL4,DUSP10,FOSB
234	NR4A2	388	Literature ChIP-seq,115;ARCHS4 Coexpression,6;Enrichr Queries,38;GTEx Coexpression,1393	BTG2,CEBPD,SDC4,CXCL1,CXCL2,THBS1,TANK,STX11,ICAM1,RELB,DUSP10,NFKBIZ,LONP1,KLF10,BRD2,EGR2,JUN,EGR3,HMGCS1,GEM,NFKBIA,NR4A1,NR4A3,IRF1,FOSB,BIRC3
235	ARID3B	389	ARCHS4 Coexpression,178;GTEx Coexpression,600	TNFRSF9,ADAM9,CD59,GULP1
236	ETV2	390.3	Literature ChIP-seq,153;ARCHS4 Coexpression,973;Enrichr Queries,232;GTEx Coexpression,203	BTG2,EGR2,JUN,CEBPD,IRX3,TNFAIP2,THBS1,NR4A2,NR4A1,ELF3,IRF1,SMG7-AS1,FOSB,FSCN3,FAM71A
237	OTX1	390.7	ARCHS4 Coexpression,420;Enrichr Queries,443;GTEx Coexpression,309	NR4A2,BTG2,EGR2,JUN,EGR3,NR4A3,NUAK2,IRX3,SKIDA1,FOSB,IRF6,THBS1
238	SP110	390.7	ARCHS4 Coexpression,652;Enrichr Queries,276;GTEx Coexpression,244	JUN,TNFRSF9,TNFAIP2,CXCL2,THBS1,STX11,ICAM1,IFIH1,NFKBIA,IRF1,NFKBIZ,BIRC3
239	ZNF503	391.7	ARCHS4 Coexpression,174;Enrichr Queries,470;GTEx Coexpression,531	NFKBIA,JAG2,BRD2,BTG2,JUN,HMGCS1,CEBPD,IRX3,NFKBIZ,FOSB,THBS1,GULP1
240	GATA1	392	Literature ChIP-seq,33;ARCHS4 Coexpression,845;ENCODE ChIP-seq,15;Enrichr Queries,439;ReMap ChIP-seq,271;GTEx Coexpression,749	BTG2,CEBPD,AMD1,MEPCE,THBS1,CXCL2,TANK,LYL1,DUSP10,NFKBIZ,LONP1,SMG7-AS1,CD59,ZBED5,EGR2,JUN,HMGCS1,VDR,GULP1,NR4A2,NR4A1,ELF3,PDIK1L,IRF1,TRIM15,IRF6,BIRC3
241	TGIF2	393.3	ARCHS4 Coexpression,1178;Enrichr Queries,116;ReMap ChIP-seq,230;GTEx Coexpression,49	KLF10,BRD2,BTG2,EGR2,JUN,EGR3,SDC4,CEBPD,SKIDA1,THBS1,RELB,ICAM1,IFIH1,NR4A2,NFKBIA,NR4A1,PLAU,IRF1,LONP1,FOSB,NFKBIE,HSPA1B,BIRC3
242	EOMES	393.4	Literature ChIP-seq,66;ARCHS4 Coexpression,411;Enrichr Queries,158;ReMap ChIP-seq,214;GTEx Coexpression,1118	BTG2,SDC4,CEBPD,TNFAIP2,THBS1,TUBA1A,PLAU,NFKBIZ,EGR2,JUN,EGR3,ARL14,SKIDA1,TNFRSF9,IRX3,GULP1,NR4A2,NR4A1,NEURL4,NR4A3,ELF3,IRF1,FOSB,ADAM9,BIRC3
243	AHRR	394	ARCHS4 Coexpression,43;GTEx Coexpression,745	ANKRD33B,LONP1,NFKBIE,ELK1,THBS1,ICAM1
244	ZNF692	394.7	ARCHS4 Coexpression,312;Enrichr Queries,502;GTEx Coexpression,370	KLF10,NR4A2,NFKBIA,NR4A1,NEURL4,BTG2,JUN,NFKBIZ,LONP1,FOSB
245	HOXB8	395	ARCHS4 Coexpression,400;Enrichr Queries,395;GTEx Coexpression,390	JAG2,BTG2,EGR2,JUN,EGR3,CEBPD,IRX3,THBS1,NR4A2,NEURL4,TUBA1A,PLAU,FOSB
246	HMX2	396.3	ARCHS4 Coexpression,202;Enrichr Queries,880;GTEx Coexpression,107	IFIH1,NR4A2,NR4A1,EGR2,ANKRD33B,EGR3,IRX3,LONP1,NFKBIE
247	OVOL2	397	ARCHS4 Coexpression,348;Enrichr Queries,670;ReMap ChIP-seq,295;GTEx Coexpression,275	NR4A2,NANOS1,EGR3,ELF3,SDC4,PLAU,IRX3,IRF6,THBS1
248	NANOG	398.5	Literature ChIP-seq,90;ARCHS4 Coexpression,723;ENCODE ChIP-seq,118;Enrichr Queries,839;ReMap ChIP-seq,194;GTEx Coexpression,427	BTG2,EGR2,JUN,SKIDA1,THBS1,GULP1,ICAM1,NR4A2,LYL1,DUSP10,NUAK2,ELF3,IRF1,LONP1,FOSB,NFKBIE
249	STAT2	400	ARCHS4 Coexpression,206;ENCODE ChIP-seq,44;Enrichr Queries,177;ReMap ChIP-seq,111;GTEx Coexpression,1462	KLF10,BTG2,JUN,ANKRD33B,CEBPD,TNFAIP2,THBS1,ICAM1,RELB,IFIH1,NFKBIA,IRF1,NFKBIZ,LONP1,SMG7-AS1,NOL10,HSPA1B,BIRC3
250	ZFP69B	401	ARCHS4 Coexpression,131;GTEx Coexpression,671	ANKRD33B,TUBA1A,CEBPD,PDIK1L
251	ZNF628	402	ARCHS4 Coexpression,412;Enrichr Queries,632;GTEx Coexpression,162	KLF10,NR4A2,NR4A1,JUN,EGR3,IRF1,SMG7-AS1,FOSB,FSCN3,ELK1,FAM71A,RELB
252	TBXT	403	ARCHS4 Coexpression,190;Enrichr Queries,1116;ReMap ChIP-seq,240;GTEx Coexpression,66	EGR2,ANKRD33B,SDC4,SKIDA1,IRX3,TNFAIP2,GULP1,IFIH1,NR4A2,NR4A1,NEURL4,NUAK2,LONP1,NFKBIE
253	NR5A1	403	ARCHS4 Coexpression,592;Enrichr Queries,229;GTEx Coexpression,388	BTG2,EGR2,JUN,EGR3,CEBPD,VDR,THBS1,NR4A2,NFKBIA,NR4A1,IRF1,LONP1,FOSB,TRIM15
254	ATOH1	403	ARCHS4 Coexpression,358;Enrichr Queries,651;GTEx Coexpression,200	NR4A2,BTG2,EGR2,JUN,EGR3,CEBPD,VDR,IRX3,TRIM15
255	ZBED2	403.3	ARCHS4 Coexpression,36;Enrichr Queries,151;GTEx Coexpression,1023	EGR2,JUN,EGR3,CEBPD,SDC4,VDR,TNFRSF9,CXCL1,CXCL3,CXCL2,THBS1,ELK1,RELB,PLAU,NFKBIZ,LONP1,FOSB,BIRC3
256	HSF4	403.7	ARCHS4 Coexpression,544;Enrichr Queries,330;GTEx Coexpression,337	EGR2,JUN,EGR3,CEBPD,TNFAIP2,THBS1,ICAM1,NR4A2,NR4A1,NEURL4,NR4A3,FOSB
257	HOXC6	404	ARCHS4 Coexpression,360;Enrichr Queries,411;GTEx Coexpression,441	NR4A2,JAG2,EGR2,JUN,EGR3,CEBPD,PLAU,IRX3,ADAM9,FOSB,CXCL1,THBS1
258	MAX	404.4	ARCHS4 Coexpression,120;ENCODE ChIP-seq,65;Enrichr Queries,615;ReMap ChIP-seq,100;GTEx Coexpression,1122	KLF10,BTG2,JUN,CEBPD,SDC4,SKIDA1,MEPCE,AMD1,TNFAIP2,UBE2G2,THBS1,STX11,ICAM1,NFKBIA,LYL1,NR4A1,NEURL4,IRF1,LONP1,FOSB,NFKBIE
259	ATF1	405	ARCHS4 Coexpression,310;ENCODE ChIP-seq,103;Enrichr Queries,736;ReMap ChIP-seq,67;GTEx Coexpression,809	BTG2,CEBPD,MEPCE,AMD1,TNFAIP2,TANK,THBS1,ICAM1,DUSP10,TUBA1A,NFKBIZ,KLF10,BRD2,JUN,SKIDA1,GEM,PTBP3,NR4A2,NFKBIA,NR4A3,IRF1,FOSB,NFKBIE,HSPA1B,BIRC3
260	TCF3	406.3	Literature ChIP-seq,72;ARCHS4 Coexpression,390;ENCODE ChIP-seq,66;Enrichr Queries,1055;ReMap ChIP-seq,64;GTEx Coexpression,791	BTG2,ANKRD33B,SDC4,AMD1,THBS1,ICAM1,IFIH1,LYL1,TUBA1A,LONP1,JAG2,KLF10,NANOS1,BRD2,JUN,EGR2,SKIDA1,UBE2G2,NR4A2,NFKBIA,NR4A1,NEURL4,MTNR1A,NR4A3,IRF1,FOSB,NFKBIE
261	KLF10	406.7	ARCHS4 Coexpression,4;Enrichr Queries,40;GTEx Coexpression,1176	BTG2,EGR2,JUN,EGR3,HMGCS1,CEBPD,SDC4,CXCL2,THBS1,GEM,ICAM1,NR4A2,NFKBIA,NR4A1,DUSP10,TUBA1A,NR4A3,ELF3,PLAU,IRF1,NFKBIZ,LONP1,FOSB,CD59
262	CENPT	407	ARCHS4 Coexpression,137;Enrichr Queries,1028;GTEx Coexpression,56	BRD2,LYL1,NEURL4,BTG2,JUN,TUBA1A,DPH3,MEPCE,THBS1
263	ZHX2	408.5	ARCHS4 Coexpression,104;Enrichr Queries,269;ReMap ChIP-seq,241;GTEx Coexpression,1020	KLF10,BTG2,JUN,CEBPD,SDC4,SKIDA1,TNFAIP2,THBS1,ICAM1,RELB,NR4A2,NFKBIA,DUSP10,IRF1,LONP1,FOSB,NFKBIE,BIRC3
264	GLI1	409	Literature ChIP-seq,160;ARCHS4 Coexpression,1129;Enrichr Queries,184;GTEx Coexpression,163	EGR2,BTG2,JUN,EGR3,VDR,THBS1,GEM,GULP1,ICAM1,NR4A2,NR4A1,PLAU,LONP1,FOSB
265	ZBTB10	409	ARCHS4 Coexpression,627;Enrichr Queries,104;GTEx Coexpression,496	KLF10,BTG2,EGR2,JUN,EGR3,AMD1,THBS1,GEM,GULP1,NR4A2,NFKBIA,NR4A1,DUSP10,NR4A3,IRF1,NFKBIZ,LONP1,FOSB
266	ZNF251	410.3	ARCHS4 Coexpression,322;Enrichr Queries,703;GTEx Coexpression,206	KLF10,NR4A2,NFKBIA,NEURL4,JUN,TUBA1A,CEBPD,IRF1,ZBED5,STX11,ICAM1
267	BCL11A	410.6	ARCHS4 Coexpression,691;ENCODE ChIP-seq,23;Enrichr Queries,588;ReMap ChIP-seq,20;GTEx Coexpression,731	KLF10,BRD2,BTG2,EGR2,JUN,ANKRD33B,EGR3,MEPCE,TANK,THBS1,STX11,ICAM1,NFKBIA,NR4A2,NEURL4,DUSP10,NR4A3,TUBA1A,IRF1,NFKBIZ,LONP1,IRF6,NFKBIE,BIRC3
268	KDM2A	412	ARCHS4 Coexpression,610;GTEx Coexpression,214	BRD2,MEPCE
269	CEBPG	412.5	ARCHS4 Coexpression,1029;Enrichr Queries,118;ReMap ChIP-seq,234;GTEx Coexpression,269	KLF10,BTG2,EGR2,JUN,HMGCS1,CEBPD,SDC4,CXCL3,CXCL2,THBS1,ICAM1,NFKBIA,NR4A2,NUAK2,PLAU,IRF1,LONP1,FOSB,NOL10,FAM71A
270	REST	413.8	Literature ChIP-seq,135;ARCHS4 Coexpression,216;ENCODE ChIP-seq,35;Enrichr Queries,809;ReMap ChIP-seq,167;GTEx Coexpression,1121	KLF10,BRD2,BTG2,JUN,SDC4,SKIDA1,IRX3,MEPCE,AMD1,TNFAIP2,UBE2G2,THBS1,PTBP3,NR4A1,NEURL4,TUBA1A,PDIK1L,IRF1,NFKBIZ,LONP1,FOSB,NOL10,NFKBIE,HSPA1B
271	IKZF1	414.8	Literature ChIP-seq,111;ARCHS4 Coexpression,575;ENCODE ChIP-seq,62;Enrichr Queries,629;ReMap ChIP-seq,74;GTEx Coexpression,1038	BTG2,EGR2,JUN,SDC4,SKIDA1,TNFAIP2,CXCL2,STX11,ICAM1,IFIH1,NFKBIA,LYL1,ELF3,PLAU,PDIK1L,IRF1,NFKBIZ,SMG7-AS1,CD59,NFKBIE,ZBED5,HSPA1B,BIRC3
272	AR	415.6	Literature ChIP-seq,98;ARCHS4 Coexpression,115;Enrichr Queries,284;ReMap ChIP-seq,91;GTEx Coexpression,1490	BTG2,SDC4,CEBPD,AMD1,CXCL1,THBS1,CXCL2,TANK,TUBA1A,NUAK2,JAG2,JUN,EGR2,VDR,IRX3,GEM,GULP1,NFKBIA,NR4A2,NR4A1,ELF3,PDIK1L,IRF1,ADAM9,FOSB,BIRC3
273	SP1	415.6	ARCHS4 Coexpression,894;ENCODE ChIP-seq,34;Enrichr Queries,720;ReMap ChIP-seq,172;GTEx Coexpression,258	BTG2,MEPCE,TNFAIP2,THBS1,ICAM1,NUAK2,DUSP10,TUBA1A,DPH3,LONP1,SMG7-AS1,ZBED5,KLF10,BRD2,JUN,ARHGAP5-AS1,GEM,PTBP3,NR4A2,NFKBIA,NEURL4,IRF1,FOSB,NFKBIE,HSPA1B
274	ZNF75D	416.3	ARCHS4 Coexpression,302;Enrichr Queries,356;GTEx Coexpression,591	BTG2,JUN,CEBPD,TNFRSF9,THBS1,PTBP3,NR4A2,NFKBIA,DUSP10,IRF1,FOSB,ZBED5,BIRC3
275	IRF6	416.7	ARCHS4 Coexpression,186;Enrichr Queries,405;GTEx Coexpression,659	NFKBIA,JAG2,BTG2,EGR2,JUN,ELF3,CEBPD,SDC4,IRX3,IRF1,THBS1,ICAM1
276	FOXP3	416.8	Literature ChIP-seq,65;ARCHS4 Coexpression,129;Enrichr Queries,272;GTEx Coexpression,1201	EGR2,JUN,EGR3,VDR,TNFRSF9,THBS1,ICAM1,RELB,PTBP3,NR4A2,NR4A1,NR4A3,IRF1
277	NEUROG2	417.3	ARCHS4 Coexpression,622;Enrichr Queries,537;GTEx Coexpression,93	IFIH1,NR4A2,BTG2,EGR2,JUN,ANKRD33B,EGR3,NR4A3,TUBA1A,IRX3,NFKBIE,THBS1
278	PLAGL2	418.7	ARCHS4 Coexpression,864;Enrichr Queries,136;GTEx Coexpression,256	KLF10,BRD2,BTG2,EGR2,JUN,SDC4,MEPCE,TNFAIP2,CXCL2,THBS1,ICAM1,IFIH1,NR4A2,NFKBIA,IRF1,NFKBIZ,LONP1,SMG7-AS1
279	ARNTL2	421.7	ARCHS4 Coexpression,28;Enrichr Queries,406;GTEx Coexpression,831	EGR2,JUN,ANKRD33B,SDC4,TNFAIP2,CXCL1,THBS1,PTBP3,ICAM1,PLAU,IRF1,ADAM9,CD59,IRF6,BIRC3
280	MZF1	421.7	ARCHS4 Coexpression,669;Enrichr Queries,245;GTEx Coexpression,351	BTG2,EGR2,JUN,EGR3,CEBPD,RELB,NR4A2,NR4A1,NEURL4,ELF3,IRF1,NFKBIZ,FOSB
281	POU5F1	421.8	Literature ChIP-seq,50;ARCHS4 Coexpression,914;Enrichr Queries,491;ReMap ChIP-seq,177;GTEx Coexpression,477	EGR2,JUN,VDR,SKIDA1,MEPCE,ICAM1,GULP1,NR4A2,LYL1,NR4A1,NEURL4,DUSP10,ELF3,PLAU,IRF1,LONP1,FOSB,ADAM9,IRF6,NFKBIE
282	THAP1	423.6	ARCHS4 Coexpression,418;ENCODE ChIP-seq,115;Enrichr Queries,578;ReMap ChIP-seq,213;GTEx Coexpression,794	KLF10,BTG2,JUN,CEBPD,THBS1,ICAM1,NR4A2,LYL1,NR4A1,NEURL4,IRF1,DPH3,LONP1,FOSB,NFKBIE,HSPA1B
283	KLF1	423.8	Literature ChIP-seq,71;ARCHS4 Coexpression,908;Enrichr Queries,271;ReMap ChIP-seq,72;GTEx Coexpression,797	KLF10,BRD2,BTG2,EGR2,JUN,CEBPD,TNFAIP2,UBE2G2,THBS1,ICAM1,NR4A2,LYL1,NR4A1,NEURL4,TUBA1A,IRF1,LONP1,FOSB,NOL10,NFKBIE
284	GFI1	424	ARCHS4 Coexpression,341;Enrichr Queries,95;GTEx Coexpression,836	BTG2,EGR2,JUN,EGR3,CEBPD,TNFRSF9,MEPCE,THBS1,ICAM1,NR4A2,NFKBIA,NR4A1,LYL1,NR4A3,IRF1,NFKBIZ,LONP1,FOSB,BIRC3
285	SPI1	424.8	Literature ChIP-seq,68;ARCHS4 Coexpression,1173;ENCODE ChIP-seq,28;Enrichr Queries,529;ReMap ChIP-seq,95;GTEx Coexpression,656	BTG2,CEBPD,MEPCE,AMD1,TNFAIP2,THBS1,TANK,STX11,ICAM1,IFIH1,LYL1,DUSP10,NUAK2,PLAU,NFKBIZ,SMG7-AS1,CD59,FAM71A,KLF10,BRD2,EGR2,JUN,EGR3,PTBP3,NFKBIA,NR4A3,PDIK1L,IRF1,FOSB,NFKBIE,BIRC3
286	HOXB7	425	Literature ChIP-seq,69;ARCHS4 Coexpression,567;Enrichr Queries,493;ReMap ChIP-seq,209;GTEx Coexpression,787	EGR2,JUN,BTG2,EGR3,ANKRD33B,CEBPD,VDR,IRX3,TNFAIP2,TANK,THBS1,NR4A2,NFKBIA,MTNR1A,PLAU,FOSB,CD59,NOL10,ZBED5,BIRC3
287	ZNF573	425.7	ARCHS4 Coexpression,248;Enrichr Queries,546;GTEx Coexpression,483	IFIH1,NR4A2,NFKBIA,JUN,NEURL4,ANKRD33B,TUBA1A,CEBPD,FOSB,THBS1,BIRC3
288	GRHL1	426	ARCHS4 Coexpression,549;Enrichr Queries,83;GTEx Coexpression,646	KLF10,BTG2,EGR2,JUN,EGR3,CEBPD,SDC4,THBS1,GEM,NR4A2,NFKBIA,NR4A1,NR4A3,ELF3,NFKBIZ,FOSB,IRF6
289	ZSCAN9	426	ARCHS4 Coexpression,235;GTEx Coexpression,617	BRD2,TUBA1A,SKIDA1
290	OSR2	426	ARCHS4 Coexpression,762;Enrichr Queries,176;GTEx Coexpression,340	BTG2,EGR2,JUN,EGR3,CEBPD,IRX3,THBS1,GEM,NR4A2,NR4A1,NR4A3,PLAU,FOSB,ZBED5
291	GBX2	426.3	Literature ChIP-seq,156;ARCHS4 Coexpression,437;Enrichr Queries,765;GTEx Coexpression,347	NR4A2,EGR2,JUN,EGR3,TUBA1A,HMGCS1,IRX3,THBS1
292	FIZ1	426.3	ARCHS4 Coexpression,79;Enrichr Queries,865;GTEx Coexpression,335	BRD2,NR4A1,NEURL4,BTG2,JUN,TUBA1A,MEPCE,LONP1,ELK1
293	JDP2	426.7	ARCHS4 Coexpression,970;Enrichr Queries,64;GTEx Coexpression,246	KLF10,BTG2,EGR2,JUN,CEBPD,SDC4,VDR,TNFAIP2,TANK,CXCL2,THBS1,STX11,ICAM1,NR4A2,NFKBIA,NR4A1,PLAU,IRF1,NFKBIZ,LONP1
294	XBP1	427.5	ARCHS4 Coexpression,364;Enrichr Queries,166;ReMap ChIP-seq,258;GTEx Coexpression,922	KLF10,BTG2,JUN,HMGCS1,CEBPD,SDC4,TNFRSF9,IRX3,THBS1,ICAM1,RELB,NFKBIA,NR4A1,TUBA1A,ELF3,IRF1,NFKBIZ,LONP1,BIRC3
295	TBX21	428	ARCHS4 Coexpression,699;Enrichr Queries,218;ReMap ChIP-seq,15;GTEx Coexpression,780	BTG2,MEPCE,TNFAIP2,ELK1,TANK,CXCL2,ICAM1,DUSP10,NFKBIZ,KLF10,BRD2,EGR2,JUN,EGR3,TNFRSF9,NFKBIA,NR4A2,NR4A1,NEURL4,NR4A3,IRF1,FOSB,NFKBIE,BIRC3
296	LMX1B	430.7	ARCHS4 Coexpression,342;Enrichr Queries,904;GTEx Coexpression,46	JAG2,NR4A2,EGR2,EGR3,TUBA1A,SDC4,IRX3,IRF6,THBS1
297	NCOA3	431	ARCHS4 Coexpression,693;Enrichr Queries,775;ReMap ChIP-seq,222;GTEx Coexpression,34	KLF10,BTG2,JUN,ANKRD33B,SDC4,UBE2G2,THBS1,GEM,PTBP3,IFIH1,NFKBIA,TUBA1A,ELF3,NFKBIZ,NFKBIE,BIRC3
298	NACC2	432	ARCHS4 Coexpression,541;GTEx Coexpression,323	NEURL4,TUBA1A
299	ZNF318	432.8	ARCHS4 Coexpression,327;Enrichr Queries,1317;ReMap ChIP-seq,25;GTEx Coexpression,62	BRD2,BTG2,JUN,ANKRD33B,EGR3,MEPCE,IFIH1,NR4A2,DUSP10,NR4A3,ELF3,PDIK1L,LONP1,FOSB,NFKBIE,FAM71A
300	ZNF384	433	ARCHS4 Coexpression,314;ENCODE ChIP-seq,38;Enrichr Queries,1092;ReMap ChIP-seq,123;GTEx Coexpression,598	KLF10,BRD2,JUN,EGR2,SKIDA1,MEPCE,GEM,STX11,ICAM1,NFKBIA,NR4A2,LYL1,NR4A1,NEURL4,TUBA1A,PDIK1L,NFKBIZ,DPH3,LONP1,FOSB,NFKBIE,HSPA1B,BIRC3
301	SP8	433.7	ARCHS4 Coexpression,107;Enrichr Queries,551;GTEx Coexpression,643	BTG2,EGR2,JUN,EGR3,HMGCS1,IRX3,SKIDA1,THBS1,GULP1,NR4A2,TUBA1A,FOSB,IRF6
302	ZNF627	434.7	ARCHS4 Coexpression,561;Enrichr Queries,189;GTEx Coexpression,554	BTG2,JUN,HMGCS1,CEBPD,THBS1,ICAM1,NFKBIA,NR4A1,TUBA1A,IRF1,NFKBIZ,LONP1,ZBED5
303	ZSCAN31	435	ARCHS4 Coexpression,140;GTEx Coexpression,730	KLF10,NEURL4,CXCL3,TANK
304	BHLHE22	435.3	ARCHS4 Coexpression,142;ReMap ChIP-seq,211;GTEx Coexpression,953	NR4A1,BTG2,ANKRD33B,TUBA1A,IRF1,TNFAIP2,NFKBIE
305	SETDB1	435.7	Literature ChIP-seq,38;ARCHS4 Coexpression,436;ENCODE ChIP-seq,110;Enrichr Queries,1275;ReMap ChIP-seq,219;GTEx Coexpression,536	JAG2,BRD2,JUN,EGR3,IRX3,MEPCE,UBE2G2,ELK1,ICAM1,NR4A2,NFKBIA,LYL1,NEURL4,MTNR1A,NUAK2,NFKBIZ,LONP1,SMG7-AS1,NOL10,ZBED5,BIRC3
306	SPEN	436	ARCHS4 Coexpression,269;GTEx Coexpression,603	BRD2,NEURL4,ZBED5
307	ZBTB33	436.6	ARCHS4 Coexpression,680;ENCODE ChIP-seq,108;Enrichr Queries,1058;ReMap ChIP-seq,261;GTEx Coexpression,76	LYL1,BTG2,JUN,HMGCS1,PDIK1L,IRF1,MEPCE,SMG7-AS1,IRF6,NFKBIE,PTBP3
308	RORA	437	ARCHS4 Coexpression,576;Enrichr Queries,482;GTEx Coexpression,253	NR4A2,NR4A1,BTG2,EGR2,JUN,IRX3,IRF1,LONP1,FOSB,IRF6,THBS1,BIRC3
309	TCF7L2	437.2	Literature ChIP-seq,154;ARCHS4 Coexpression,230;ENCODE ChIP-seq,42;Enrichr Queries,684;ReMap ChIP-seq,16;GTEx Coexpression,1497	BTG2,SDC4,AMD1,TNFAIP2,THBS1,NUAK2,DUSP10,TUBA1A,PLAU,NFKBIZ,SMG7-AS1,ZBED5,KLF10,NANOS1,JUN,EGR3,SKIDA1,GULP1,NR4A2,NFKBIA,NEURL4,ELF3,IRF1,FOSB,HSPA1B,BIRC3
310	HOXC4	440	ARCHS4 Coexpression,155;Enrichr Queries,838;GTEx Coexpression,327	BRD2,BTG2,EGR2,JUN,NEURL4,IRX3,LONP1,ADAM9,FOSB,THBS1
311	ESRRA	440.8	ARCHS4 Coexpression,284;ENCODE ChIP-seq,90;Enrichr Queries,438;ReMap ChIP-seq,221;GTEx Coexpression,1171	BTG2,EGR2,JUN,SDC4,CEBPD,VDR,TNFAIP2,ICAM1,RELB,NFKBIA,NR4A1,NEURL4,ELF3,PLAU,IRF1,LONP1,CD59,NFKBIE,ZBED5
312	TFAP2B	444.3	ARCHS4 Coexpression,385;Enrichr Queries,658;GTEx Coexpression,290	NR4A2,EGR2,JUN,EGR3,TUBA1A,IRX3,FOSB,IRF6,THBS1
313	E2F1	446.7	Literature ChIP-seq,63;ARCHS4 Coexpression,392;ENCODE ChIP-seq,79;Enrichr Queries,1308;ReMap ChIP-seq,77;GTEx Coexpression,761	KLF10,JUN,SDC4,CEBPD,SKIDA1,MEPCE,UBE2G2,THBS1,CXCL2,TANK,STX11,NR4A2,IFIH1,NEURL4,NUAK2,IRF1,LONP1,FOSB,NFKBIE,ZBED5,BIRC3
314	ZNF823	448	ARCHS4 Coexpression,497;Enrichr Queries,59;GTEx Coexpression,788	KLF10,BTG2,JUN,EGR3,HMGCS1,CEBPD,SDC4,THBS1,NR4A2,NFKBIA,NEURL4,DUSP10,ELF3,PLAU,IRF1,NFKBIZ,LONP1,FOSB,HSPA1B,BIRC3
315	ZNF324	448.3	ARCHS4 Coexpression,77;Enrichr Queries,173;GTEx Coexpression,1095	KLF10,BRD2,BTG2,JUN,CEBPD,MEPCE,THBS1,RELB,NR4A2,NFKBIA,NR4A1,NEURL4,IRF1,LONP1,FOSB
316	TBX19	449	ARCHS4 Coexpression,670;Enrichr Queries,124;GTEx Coexpression,553	JAG2,BTG2,EGR2,JUN,EGR3,CEBPD,VDR,THBS1,GEM,NR4A2,NFKBIA,NR4A1,DUSP10,NR4A3,ELF3,IRF1,FOSB
317	ZNF487	449.7	ARCHS4 Coexpression,741;Enrichr Queries,489;GTEx Coexpression,119	NR4A2,NR4A1,BTG2,JUN,NEURL4,NR4A3,PLAU,SMG7-AS1,FSCN3,THBS1,ICAM1,BIRC3
318	POU3F3	450	ARCHS4 Coexpression,304;Enrichr Queries,645;GTEx Coexpression,401	NR4A2,NR4A1,EGR2,JUN,EGR3,NR4A3,TUBA1A,HMGCS1,IRX3
319	TET2	451	ARCHS4 Coexpression,645;GTEx Coexpression,257	STX11,PTBP3
320	HHEX	452	ARCHS4 Coexpression,616;Enrichr Queries,66;ReMap ChIP-seq,262;GTEx Coexpression,864	BTG2,EGR2,JUN,CEBPD,SDC4,TNFAIP2,CXCL1,CXCL2,TANK,THBS1,ICAM1,NFKBIA,NR4A2,LYL1,NR4A1,PLAU,IRF1,NFKBIZ,LONP1,SMG7-AS1
321	NR1D1	452.3	ARCHS4 Coexpression,522;Enrichr Queries,56;GTEx Coexpression,779	KLF10,BTG2,EGR2,JUN,EGR3,CEBPD,SDC4,TNFAIP2,CXCL2,THBS1,GEM,ICAM1,NR4A2,NFKBIA,NR4A1,NR4A3,ELF3,IRF1,LONP1,FOSB,IRF6
322	MXD1	452.7	ARCHS4 Coexpression,286;Enrichr Queries,19;GTEx Coexpression,1053	BTG2,CEBPD,SDC4,TNFAIP2,CXCL1,CXCL2,THBS1,STX11,ICAM1,IFIH1,DUSP10,NFKBIZ,LONP1,KLF10,EGR2,JUN,GEM,NR4A2,NFKBIA,NR4A1,NR4A3,IRF1,FOSB,BIRC3
323	MECOM	453.3	Literature ChIP-seq,2;ARCHS4 Coexpression,1201;GTEx Coexpression,157	BTG2,JUN,ARL14,CEBPD,TNFRSF9,TNFAIP2,CXCL3,CXCL2,TANK,ICAM1,PTBP3,IFIH1,NFKBIA,LYL1,TUBA1A,NUAK2,ELF3,PDIK1L,DPH3,BIRC3
324	ZNF250	453.7	ARCHS4 Coexpression,735;Enrichr Queries,253;GTEx Coexpression,373	KLF10,BTG2,EGR2,JUN,CEBPD,THBS1,NR4A2,NFKBIA,NR4A1,TUBA1A,IRF1,FOSB,ZBED5
325	RARA	454.4	Literature ChIP-seq,84;ARCHS4 Coexpression,1148;Enrichr Queries,102;ReMap ChIP-seq,196;GTEx Coexpression,742	BTG2,CEBPD,SDC4,MEPCE,TNFAIP2,THBS1,STX11,ICAM1,LYL1,LONP1,KLF10,EGR2,JUN,EGR3,VDR,UBE2G2,GEM,NR4A2,NFKBIA,NR4A1,NEURL4,IRF1,FOSB,IRF6,NFKBIE
326	E4F1	454.5	Literature ChIP-seq,60;ARCHS4 Coexpression,441;Enrichr Queries,988;GTEx Coexpression,329	NR4A1,NEURL4,JUN,IRF1,LONP1,TANK
327	NR2E1	455	ARCHS4 Coexpression,217;Enrichr Queries,764;GTEx Coexpression,384	NR4A2,BTG2,EGR2,JUN,EGR3,NR4A3,TUBA1A,HMGCS1
328	SOX14	455.3	ARCHS4 Coexpression,156;Enrichr Queries,1005;GTEx Coexpression,205	NR4A2,EGR2,MTNR1A,TUBA1A,EGR3,IRX3,AMD1,BIRC3
329	TP53	455.4	Literature ChIP-seq,19;ARCHS4 Coexpression,1172;Enrichr Queries,450;ReMap ChIP-seq,115;GTEx Coexpression,521	NANOS1,BRD2,BTG2,JUN,EGR2,ANKRD33B,EGR3,SDC4,CEBPD,VDR,IRX3,CXCL1,THBS1,PTBP3,ICAM1,NFKBIA,NR4A2,NEURL4,NUAK2,TUBA1A,PLAU,IRF1,NFKBIE,FAM71A
330	ZNF175	456	ARCHS4 Coexpression,682;Enrichr Queries,255;ReMap ChIP-seq,34;GTEx Coexpression,853	BRD2,JUN,EGR3,SDC4,SKIDA1,MEPCE,CXCL2,THBS1,GEM,ICAM1,IFIH1,NR4A2,NR4A1,LYL1,DUSP10,NUAK2,PDIK1L,PLAU,IRF1,NFKBIZ,FOSB,HSPA1B,BIRC3
331	ZNF879	457.5	ARCHS4 Coexpression,109;GTEx Coexpression,806	TUBA1A,PDIK1L,DPH3,LONP1
332	BACH2	458	ARCHS4 Coexpression,355;Enrichr Queries,235;ReMap ChIP-seq,218;GTEx Coexpression,1024	BTG2,EGR2,JUN,ANKRD33B,EGR3,THBS1,ICAM1,NR4A2,NR4A1,DUSP10,NR4A3,IRF1,LONP1,SMG7-AS1,ADAM9,FOSB
333	RARG	458.5	Literature ChIP-seq,142;ARCHS4 Coexpression,944;Enrichr Queries,108;GTEx Coexpression,640	JAG2,BTG2,EGR2,JUN,CEBPD,SDC4,VDR,TNFRSF9,TNFAIP2,THBS1,ICAM1,NR4A2,NFKBIA,NR4A1,PLAU,IRF1,LONP1,FOSB,IRF6
334	MTF1	459	ARCHS4 Coexpression,34;GTEx Coexpression,884	IFIH1,TNFAIP2,CXCL3,NFKBIE,CXCL2,STX11,ICAM1
335	NFE2	460.6	ARCHS4 Coexpression,850;ENCODE ChIP-seq,72;Enrichr Queries,171;ReMap ChIP-seq,105;GTEx Coexpression,1105	BTG2,CEBPD,MEPCE,TNFAIP2,CXCL2,THBS1,ICAM1,RELB,LYL1,DUSP10,NFKBIZ,DPH3,LONP1,KLF10,EGR2,JUN,GEM,NFKBIA,NR4A1,NEURL4,PDIK1L,IRF1,FOSB,NOL10,NFKBIE
336	ZNF449	461.3	ARCHS4 Coexpression,208;Enrichr Queries,963;GTEx Coexpression,213	BTG2,JUN,TUBA1A,LONP1,UBE2G2,THBS1,ZBED5,GULP1
337	BARX1	462.3	ARCHS4 Coexpression,259;Enrichr Queries,993;GTEx Coexpression,135	NR4A2,BTG2,EGR2,NR4A3,IRX3,LONP1,GEM
338	HOXB9	462.7	ARCHS4 Coexpression,927;Enrichr Queries,233;GTEx Coexpression,228	BTG2,EGR2,JUN,VDR,IRX3,TNFAIP2,THBS1,ICAM1,NR4A2,NR4A1,PLAU,LONP1,FOSB,TRIM15,BIRC3
339	JRK	464.5	ARCHS4 Coexpression,347;GTEx Coexpression,582	BRD2,NEURL4
340	TAL2	464.7	ARCHS4 Coexpression,72;Enrichr Queries,257;GTEx Coexpression,1065	EGR2,JUN,EGR3,HMGCS1,SKIDA1,CXCL3,CXCL2,THBS1,ICAM1,GULP1,NR4A2,NR4A1,NR4A3,TUBA1A,PLAU,BIRC3
341	ZNF143	465.4	ARCHS4 Coexpression,503;ENCODE ChIP-seq,61;Enrichr Queries,379;ReMap ChIP-seq,231;GTEx Coexpression,1153	KLF10,BRD2,JUN,HMGCS1,MEPCE,AMD1,THBS1,ICAM1,NR4A2,NFKBIA,NR4A1,NEURL4,DUSP10,TUBA1A,NR4A3,IRF1,FOSB,NOL10,NFKBIE,ZBED5
342	ZNF300	466.3	ARCHS4 Coexpression,289;Enrichr Queries,685;GTEx Coexpression,425	IFIH1,NR4A2,JUN,TUBA1A,HMGCS1,PLAU,NFKBIZ,FOSB,ZBED5,THBS1
343	ZNF606	466.3	ARCHS4 Coexpression,596;Enrichr Queries,729;GTEx Coexpression,74	BRD2,NEURL4,BTG2,JUN,TUBA1A,FOSB,ZBED5,THBS1,BIRC3
344	BHLHE23	466.5	ARCHS4 Coexpression,842;GTEx Coexpression,91	IFIH1,ANKRD33B,NFKBIE,ELK1
345	HOMEZ	466.7	ARCHS4 Coexpression,996;Enrichr Queries,267;GTEx Coexpression,137	BTG2,EGR2,JUN,SDC4,VDR,THBS1,NR4A2,NFKBIA,NR4A1,IRF1,LONP1,SMG7-AS1,FOSB,FSCN3,FAM71A
346	ZNF207	466.8	ARCHS4 Coexpression,318;Enrichr Queries,1315;ReMap ChIP-seq,65;GTEx Coexpression,169	BTG2,EGR3,HMGCS1,AMD1,PTBP3,ICAM1,NR4A2,NFKBIA,LYL1,NUAK2,TUBA1A,IRF1,FOSB,NFKBIE,ZBED5,HSPA1B
347	SAFB	467	ARCHS4 Coexpression,323;GTEx Coexpression,611	BRD2,NEURL4,LONP1
348	HLF	467.7	ARCHS4 Coexpression,644;Enrichr Queries,294;GTEx Coexpression,465	KLF10,BTG2,EGR2,JUN,EGR3,CEBPD,SKIDA1,THBS1,NR4A2,NR4A1,NR4A3,FOSB,TRIM15
349	GLIS1	468.7	ARCHS4 Coexpression,249;Enrichr Queries,757;GTEx Coexpression,400	NR4A2,EGR2,JUN,EGR3,AMD1,ADAM9,THBS1,GEM
350	RFX2	468.8	ARCHS4 Coexpression,1111;Enrichr Queries,161;ReMap ChIP-seq,239;GTEx Coexpression,364	JUN,BTG2,EGR2,EGR3,SDC4,CEBPD,THBS1,ICAM1,NR4A2,NR4A1,TUBA1A,IRF1,DPH3,NFKBIZ,LONP1,SMG7-AS1,FOSB
351	FAM200B	469.5	ARCHS4 Coexpression,359;GTEx Coexpression,580	NR4A2,NEURL4,LONP1
352	NANOGP8	471	ARCHS4 Coexpression,900;GTEx Coexpression,42	SKIDA1,UBE2G2,ZBED5,STX11,GULP1
353	AKAP8L	471	ARCHS4 Coexpression,301;Enrichr Queries,979;GTEx Coexpression,133	NFKBIA,BRD2,NEURL4,BTG2,JUN,LONP1,ICAM1
354	MBD2	471.5	ARCHS4 Coexpression,695;Enrichr Queries,842;ReMap ChIP-seq,142;GTEx Coexpression,207	JAG2,BTG2,JUN,EGR3,IRX3,TNFAIP2,THBS1,PTBP3,ICAM1,NR4A2,NFKBIA,LYL1,NR4A1,ADAM9,NFKBIE
355	ELK4	474	ARCHS4 Coexpression,643;ENCODE ChIP-seq,107;Enrichr Queries,614;ReMap ChIP-seq,188;GTEx Coexpression,818	KLF10,JUN,BTG2,EGR3,MEPCE,THBS1,ELK1,PTBP3,NR4A2,NFKBIA,NR4A1,NR4A3,IRF1,DPH3,LONP1,FOSB
356	SPZ1	475	ARCHS4 Coexpression,818;GTEx Coexpression,132	SMG7-AS1,FSCN3,FAM71A
357	HOXB13	475.3	ARCHS4 Coexpression,764;Enrichr Queries,540;ReMap ChIP-seq,253;GTEx Coexpression,344	BTG2,EGR2,JUN,IRX3,AMD1,UBE2G2,THBS1,GULP1,NR4A2,NR4A1,NUAK2,ELF3,ADAM9
358	IRF9	475.3	ARCHS4 Coexpression,350;Enrichr Queries,96;ReMap ChIP-seq,81;GTEx Coexpression,1374	BRD2,BTG2,JUN,CEBPD,SDC4,MEPCE,TNFAIP2,CXCL3,CXCL2,THBS1,STX11,ICAM1,RELB,NFKBIA,IFIH1,LYL1,TUBA1A,PDIK1L,IRF1,NFKBIZ,LONP1,HSPA1B,BIRC3
359	ZNF730	476.5	ARCHS4 Coexpression,246;GTEx Coexpression,707	HMGCS1,SMG7-AS1,GULP1
360	PRDM4	476.7	ARCHS4 Coexpression,112;Enrichr Queries,409;GTEx Coexpression,909	KLF10,NR4A2,NFKBIA,BRD2,BTG2,JUN,NEURL4,CEBPD,IRF1,MEPCE,LONP1,THBS1
361	MYRFL	477	ARCHS4 Coexpression,779;GTEx Coexpression,175	VDR,TRIM15
362	AIRE	478	ARCHS4 Coexpression,1065;Enrichr Queries,228;GTEx Coexpression,141	EGR2,JUN,ANKRD33B,CEBPD,VDR,TNFRSF9,CXCL2,ICAM1,NR4A2,NFKBIA,TUBA1A,PLAU,IRF1,BIRC3
363	ZNF354B	478	ARCHS4 Coexpression,1043;Enrichr Queries,182;GTEx Coexpression,209	KLF10,BTG2,JUN,CEBPD,UBE2G2,THBS1,GEM,IFIH1,NR4A2,NR4A1,NFKBIZ,LONP1,FOSB,ZBED5,BIRC3
364	ZNF280A	478.3	ARCHS4 Coexpression,574;Enrichr Queries,462;GTEx Coexpression,399	IFIH1,BTG2,JUN,NR4A3,PLAU,AMD1,LONP1,FOSB,THBS1,ICAM1,BIRC3
365	TIGD6	478.7	ARCHS4 Coexpression,443;Enrichr Queries,853;GTEx Coexpression,140	BTG2,JUN,NEURL4,DUSP10,VDR,ADAM9,FOSB,NOL10,THBS1
366	SOX30	479.3	ARCHS4 Coexpression,955;Enrichr Queries,352;GTEx Coexpression,131	EGR2,JUN,EGR3,CEBPD,TNFAIP2,THBS1,NR4A2,NR4A3,SMG7-AS1,FOSB,FSCN3,FAM71A,BIRC3
367	FOXD4	480.3	ARCHS4 Coexpression,193;Enrichr Queries,351;GTEx Coexpression,897	NR4A2,JAG2,EGR2,JUN,EGR3,NR4A3,CEBPD,IRX3,LONP1,FOSB,CXCL2,THBS1
368	FOXH1	481	ARCHS4 Coexpression,861;Enrichr Queries,517;GTEx Coexpression,65	KLF10,NR4A1,EGR2,JUN,ELF3,CEBPD,VDR,IRF1,LONP1,FOSB,TRIM15,GULP1
369	ESR2	481.8	Literature ChIP-seq,112;ARCHS4 Coexpression,1508;Enrichr Queries,196;ReMap ChIP-seq,235;GTEx Coexpression,358	KLF10,EGR2,JUN,EGR3,VDR,SKIDA1,THBS1,ICAM1,NR4A2,NFKBIA,NR4A1,TUBA1A,ELF3,PLAU,IRF1,LONP1,SMG7-AS1,FOSB
370	SP2	482.4	ARCHS4 Coexpression,1170;ENCODE ChIP-seq,91;Enrichr Queries,252;ReMap ChIP-seq,270;GTEx Coexpression,629	KLF10,NANOS1,BRD2,BTG2,EGR2,JUN,HMGCS1,AMD1,ELK1,THBS1,STX11,NR4A2,NFKBIA,NR4A1,NEURL4,DUSP10,NUAK2,IRF1,LONP1,FOSB,ZBED5,HSPA1B
371	ATF6	482.7	ARCHS4 Coexpression,345;Enrichr Queries,436;GTEx Coexpression,667	KLF10,BTG2,JUN,CEBPD,THBS1,STX11,ICAM1,NR4A2,NFKBIA,NR4A1,NFKBIZ,ADAM9,CD59
372	MNX1	484.5	Literature ChIP-seq,138;ARCHS4 Coexpression,157;Enrichr Queries,646;GTEx Coexpression,997	NR4A2,JAG2,BRD2,EGR2,JUN,EGR3,ELF3,IRX3,LONP1,FOSB,UBE2G2,NFKBIE
373	FOXF1	486.3	ARCHS4 Coexpression,62;Enrichr Queries,385;GTEx Coexpression,1012	NR4A2,EGR2,JUN,CEBPD,PLAU,IRF1,FOSB,ADAM9,CD59,CXCL2,THBS1,GEM
374	EN2	486.3	ARCHS4 Coexpression,98;Enrichr Queries,355;GTEx Coexpression,1006	BTG2,EGR2,JUN,EGR3,HMGCS1,IRX3,SKIDA1,THBS1,NR4A2,NR4A1,NR4A3,TUBA1A,FOSB
375	ZNF226	488.7	ARCHS4 Coexpression,227;Enrichr Queries,735;GTEx Coexpression,504	BTG2,JUN,NEURL4,TUBA1A,HMGCS1,SDC4,IRF1,ZBED5,THBS1,BIRC3
376	SRY	489	Literature ChIP-seq,56;ARCHS4 Coexpression,885;Enrichr Queries,357;GTEx Coexpression,658	KLF10,BRD2,EGR2,JUN,BTG2,EGR3,CEBPD,HMGCS1,VDR,IRX3,GEM,ICAM1,NR4A2,NR4A1,LYL1,NEURL4,NUAK2,ELF3,PLAU,PDIK1L,IRF1,FOSB,IRF6
377	RXRA	489.5	Literature ChIP-seq,23;ARCHS4 Coexpression,1090;ENCODE ChIP-seq,87;Enrichr Queries,427;ReMap ChIP-seq,35;GTEx Coexpression,1275	BTG2,SDC4,CEBPD,TNFAIP2,THBS1,CXCL2,ICAM1,LYL1,NUAK2,DUSP10,NFKBIZ,LONP1,KLF10,BRD2,JUN,EGR2,VDR,SKIDA1,UBE2G2,PTBP3,NFKBIA,IRF1,FOSB,NOL10,IRF6,NFKBIE,BIRC3
378	LHX1	492.5	ARCHS4 Coexpression,336;Enrichr Queries,649	NR4A2,BTG2,EGR2,JUN,EGR3,TUBA1A,HMGCS1,IRX3,THBS1
379	ASCL2	494	ARCHS4 Coexpression,810;Enrichr Queries,133;GTEx Coexpression,539	BTG2,EGR2,JUN,EGR3,CEBPD,VDR,IRX3,TNFAIP2,THBS1,ICAM1,NR4A2,ELF3,IRF1,FOSB,IRF6,BIRC3
380	TBX10	494	ARCHS4 Coexpression,381;Enrichr Queries,923;GTEx Coexpression,178	NR4A1,EGR2,VDR,TNFAIP2,TRIM15,BIRC3
381	ZNF317	494.7	ARCHS4 Coexpression,356;Enrichr Queries,203;GTEx Coexpression,925	KLF10,BRD2,BTG2,JUN,AMD1,THBS1,RELB,NFKBIA,NR4A1,IRF1,NFKBIZ,FOSB,BIRC3
382	PRRX2	495	ARCHS4 Coexpression,558;Enrichr Queries,577;GTEx Coexpression,350	NR4A1,EGR2,CEBPD,PLAU,IRX3,ADAM9,FOSB,THBS1,GEM
383	SNAI3	495.7	ARCHS4 Coexpression,328;Enrichr Queries,202;GTEx Coexpression,957	JAG2,BTG2,EGR2,JUN,EGR3,VDR,TNFAIP2,ICAM1,RELB,NR4A1,LYL1,NR4A3,IRF1,LONP1,FOSB
384	CHAMP1	498	ARCHS4 Coexpression,424;GTEx Coexpression,572	BRD2,ANKRD33B
385	SOX3	498.3	ARCHS4 Coexpression,195;Enrichr Queries,933;GTEx Coexpression,367	NR4A2,EGR2,JUN,EGR3,TUBA1A,HMGCS1,IRX3,SKIDA1,THBS1
386	DMRT3	499	ARCHS4 Coexpression,306;Enrichr Queries,1000;GTEx Coexpression,191	NR4A2,BRD2,EGR3,NR4A3,TUBA1A,IRX3,SKIDA1,MEPCE
387	ZNF33A	500	ARCHS4 Coexpression,119;Enrichr Queries,1036;GTEx Coexpression,345	BTG2,TUBA1A,LONP1,ZBED5,THBS1,ELK1,PTBP3
388	TRPS1	502.3	ARCHS4 Coexpression,535;Enrichr Queries,946;GTEx Coexpression,26	NR4A2,JUN,ELF3,SDC4,IRX3,IRF6,THBS1,GEM
389	TFAP2E	503.7	ARCHS4 Coexpression,238;Enrichr Queries,337;GTEx Coexpression,936	BTG2,EGR2,JUN,EGR3,CEBPD,IRX3,ELK1,NR4A2,NR4A1,LYL1,NR4A3,ELF3,FOSB
390	E2F5	504.5	ARCHS4 Coexpression,1440;Enrichr Queries,285;ReMap ChIP-seq,78;GTEx Coexpression,215	BTG2,EGR2,JUN,HMGCS1,CEBPD,MEPCE,UBE2G2,CXCL3,CXCL2,THBS1,IFIH1,NR4A2,NFKBIA,LYL1,PDIK1L,IRF1,LONP1,ADAM9,FOSB,ZBED5,HSPA1B,BIRC3
391	CREB5	504.7	ARCHS4 Coexpression,814;Enrichr Queries,30;GTEx Coexpression,670	BTG2,EGR2,JUN,EGR3,CEBPD,TNFAIP2,CXCL1,CXCL2,THBS1,STX11,GEM,ICAM1,NR4A2,NFKBIA,NR4A1,DUSP10,NR4A3,NUAK2,PLAU,IRF1,NFKBIZ,LONP1,FOSB,BIRC3
392	SALL4	505.8	Literature ChIP-seq,47;ARCHS4 Coexpression,330;Enrichr Queries,1143;GTEx Coexpression,503	BRD2,EGR2,SKIDA1,AMD1,THBS1,TANK,GULP1,NFKBIA,MTNR1A,NUAK2,NR4A3,ELF3,LONP1,ADAM9
393	SOX2	507.4	Literature ChIP-seq,7;ARCHS4 Coexpression,1006;Enrichr Queries,1040;ReMap ChIP-seq,162;GTEx Coexpression,322	BTG2,CEBPD,TNFAIP2,CXCL1,CXCL3,THBS1,TANK,TUBA1A,NUAK2,PLAU,NFKBIZ,SMG7-AS1,CD59,NANOS1,JUN,EGR3,ARL14,SKIDA1,ARHGAP5-AS1,GULP1,NR4A2,NR4A3,ELF3,IRF1,FOSB,IRF6,HSPA1B
394	ARHGAP35	508.5	ARCHS4 Coexpression,577;GTEx Coexpression,440	NEURL4,FSCN3
395	SEBOX	509	ARCHS4 Coexpression,595;Enrichr Queries,423	NR4A1,BTG2,EGR2,JUN,CEBPD,NFKBIZ,FOSB,CXCL2,THBS1,FAM71A,ICAM1
396	PAX8	509	ARCHS4 Coexpression,599;Enrichr Queries,72;ReMap ChIP-seq,278;GTEx Coexpression,1087	BTG2,EGR2,JUN,EGR3,CEBPD,SDC4,VDR,THBS1,ICAM1,NR4A2,NFKBIA,NR4A1,NR4A3,ELF3,PLAU,IRF1,FOSB,IRF6
397	ZNF512B	509.7	ARCHS4 Coexpression,274;Enrichr Queries,1104;GTEx Coexpression,151	NEURL4,JUN,PLAU,IRF1,DPH3,LONP1,ICAM1
398	ALX4	510	ARCHS4 Coexpression,586;Enrichr Queries,762;GTEx Coexpression,182	JAG2,NR4A2,EGR2,NEURL4,EGR3,VDR,IRX3,THBS1
399	SRCAP	511	ARCHS4 Coexpression,338;Enrichr Queries,739;GTEx Coexpression,456	NFKBIA,BRD2,BTG2,JUN,NEURL4,SDC4,LONP1,THBS1
400	ZNF134	511.3	ARCHS4 Coexpression,242;Enrichr Queries,369;GTEx Coexpression,923	KLF10,NR4A2,NFKBIA,BTG2,JUN,DUSP10,TUBA1A,HMGCS1,AMD1,THBS1,BIRC3,GULP1
401	NR0B1	511.5	Literature ChIP-seq,73;ARCHS4 Coexpression,1104;Enrichr Queries,544;GTEx Coexpression,325	BRD2,EGR2,JUN,BTG2,HMGCS1,CEBPD,THBS1,ICAM1,NR4A2,NFKBIA,NR4A1,MTNR1A,PDIK1L,DPH3,LONP1,FOSB,IRF6
402	USF1	512.8	ARCHS4 Coexpression,1088;ENCODE ChIP-seq,30;Enrichr Queries,264;ReMap ChIP-seq,154;GTEx Coexpression,1028	BTG2,CEBPD,SDC4,MEPCE,TNFAIP2,CXCL1,THBS1,ELK1,ICAM1,RELB,IFIH1,NUAK2,PLAU,DPH3,LONP1,KLF10,BRD2,EGR2,JUN,VDR,GEM,NFKBIA,NR4A1,NEURL4,IRF1,FOSB,NFKBIE
403	ZFP2	513.3	ARCHS4 Coexpression,674;Enrichr Queries,680;GTEx Coexpression,186	NR4A1,NEURL4,BTG2,EGR2,JUN,TUBA1A,FOSB,THBS1,GEM,PTBP3
404	VAX1	514	ARCHS4 Coexpression,177;Enrichr Queries,1008;GTEx Coexpression,357	NR4A2,EGR2,EGR3,TUBA1A,NUAK2,IRX3,SKIDA1
405	ZSCAN21	514.7	ARCHS4 Coexpression,629;Enrichr Queries,261;GTEx Coexpression,654	KLF10,BTG2,EGR2,JUN,HMGCS1,SDC4,RELB,NFKBIA,NR4A1,TUBA1A,IRF1,DPH3,NFKBIZ,LONP1
406	DMTF1	514.7	ARCHS4 Coexpression,1077;Enrichr Queries,311;GTEx Coexpression,156	KLF10,BRD2,BTG2,EGR2,JUN,HMGCS1,CEBPD,THBS1,ICAM1,NR4A2,NFKBIA,NR4A1,ZBED5
407	RXRB	516.7	ARCHS4 Coexpression,703;Enrichr Queries,723;GTEx Coexpression,124	NFKBIA,BRD2,NR4A1,NEURL4,BTG2,JUN,TUBA1A,IRF1,ZBED5
408	NFYA	516.8	ARCHS4 Coexpression,915;ENCODE ChIP-seq,50;Enrichr Queries,408;ReMap ChIP-seq,216;GTEx Coexpression,995	KLF10,BRD2,BTG2,EGR2,JUN,CEBPD,HMGCS1,MEPCE,AMD1,ELK1,THBS1,PTBP3,NR4A2,NR4A1,DUSP10,NUAK2,PDIK1L,IRF1,DPH3,FOSB,SMG7-AS1,ZBED5
409	ZNF202	517	ARCHS4 Coexpression,1087;Enrichr Queries,290;GTEx Coexpression,174	KLF10,BRD2,BTG2,EGR2,JUN,AMD1,THBS1,RELB,NFKBIA,IRF1,LONP1,NOL10,BIRC3
410	ZNF2	517.5	ARCHS4 Coexpression,770;Enrichr Queries,265	KLF10,BTG2,EGR2,JUN,THBS1,NR4A2,NR4A1,NEURL4,DUSP10,NR4A3,IRF1,NFKBIZ,FOSB
411	IRX6	518.7	ARCHS4 Coexpression,464;Enrichr Queries,1015;GTEx Coexpression,77	JAG2,NR4A2,EGR3,IRX3,FOSB,FAM71A
412	ZNF20	519	ARCHS4 Coexpression,1092;Enrichr Queries,268;GTEx Coexpression,197	BTG2,EGR2,JUN,CEBPD,THBS1,ICAM1,NFKBIA,TUBA1A,PLAU,IRF1,SMG7-AS1,FOSB,FSCN3,BIRC3
413	ERG	519.6	Literature ChIP-seq,96;ARCHS4 Coexpression,116;Enrichr Queries,756;ReMap ChIP-seq,157;GTEx Coexpression,1473	NANOS1,EGR2,JUN,SKIDA1,MEPCE,AMD1,TNFAIP2,UBE2G2,THBS1,TANK,GEM,ICAM1,NR4A2,LYL1,NR4A1,DUSP10,PDIK1L,IRF1,LONP1,FOSB,NFKBIE
414	ZFP90	520.7	ARCHS4 Coexpression,585;Enrichr Queries,421;GTEx Coexpression,556	IFIH1,BTG2,EGR2,JUN,TUBA1A,PLAU,IRF1,NFKBIZ,CXCL2,THBS1,ICAM1
415	ZNF526	522.3	ARCHS4 Coexpression,469;Enrichr Queries,635;GTEx Coexpression,463	NANOS1,BRD2,BTG2,JUN,CEBPD,IRF1,FOSB,NOL10,THBS1,RELB
416	RFX1	522.8	ARCHS4 Coexpression,824;Enrichr Queries,846;ReMap ChIP-seq,242;GTEx Coexpression,179	BRD2,NR4A1,JUN,NEURL4,BTG2,SDC4,IRF1,MEPCE,SMG7-AS1,FOSB,HSPA1B,FAM71A
417	TFE3	523.7	ARCHS4 Coexpression,1106;Enrichr Queries,170;GTEx Coexpression,295	KLF10,JUN,CEBPD,SDC4,TNFAIP2,THBS1,STX11,ICAM1,RELB,NR4A2,NFKBIA,NR4A1,PDIK1L,PLAU,IRF1,LONP1
418	SOX13	524.5	ARCHS4 Coexpression,1130;Enrichr Queries,201;ReMap ChIP-seq,267;GTEx Coexpression,500	BRD2,BTG2,EGR2,JUN,SDC4,CEBPD,SKIDA1,THBS1,GULP1,NR4A2,NR4A1,DUSP10,NUAK2,ELF3,IRF1,FOSB,HSPA1B
419	MEF2A	524.8	Literature ChIP-seq,122;ARCHS4 Coexpression,1382;ENCODE ChIP-seq,5;Enrichr Queries,716;ReMap ChIP-seq,66;GTEx Coexpression,858	BRD2,BTG2,JUN,EGR2,ANKRD33B,CEBPD,MEPCE,THBS1,NR4A2,NFKBIA,NR4A1,DUSP10,NR4A3,PLAU,IRF1,NFKBIZ,FOSB,ADAM9,IRF6,ZBED5,BIRC3
420	ETS1	525.3	Literature ChIP-seq,147;ARCHS4 Coexpression,1496;ENCODE ChIP-seq,2;Enrichr Queries,200;ReMap ChIP-seq,53;GTEx Coexpression,1254	BTG2,ANKRD33B,CEBPD,SDC4,MEPCE,AMD1,TNFAIP2,THBS1,STX11,ICAM1,RELB,LYL1,DUSP10,PLAU,NFKBIZ,DPH3,LONP1,KLF10,BRD2,JUN,EGR2,EGR3,PTBP3,NR4A2,NFKBIA,NR4A1,NEURL4,IRF1,FOSB,TRIM15,NFKBIE,BIRC3
421	ZBTB42	525.5	ARCHS4 Coexpression,162;GTEx Coexpression,889	JAG2,IRX3,MEPCE
422	CUX1	529	Literature ChIP-seq,22;ARCHS4 Coexpression,867;ENCODE ChIP-seq,47;Enrichr Queries,1286;ReMap ChIP-seq,151;GTEx Coexpression,801	BTG2,SDC4,MEPCE,AMD1,CXCL1,CXCL3,THBS1,CXCL2,ELK1,ICAM1,LYL1,DUSP10,NFKBIZ,DPH3,SMG7-AS1,CD59,ZBED5,BRD2,JUN,EGR2,HMGCS1,SKIDA1,PTBP3,NFKBIA,ELF3,IRF1,FOSB,ADAM9,NFKBIE,HSPA1B,BIRC3
423	SPIC	529.3	ARCHS4 Coexpression,435;Enrichr Queries,338;GTEx Coexpression,815	EGR2,JUN,TNFAIP2,CXCL1,CXCL3,CXCL2,THBS1,ICAM1,NFKBIA,NR4A1,ELF3,IRF1,NFKBIZ,NOL10
424	ASCL3	530.3	ARCHS4 Coexpression,767;Enrichr Queries,593;GTEx Coexpression,231	NR4A2,NR4A1,EGR2,JUN,NR4A3,ELF3,CD59,CXCL2,ICAM1
425	THAP2	531	ARCHS4 Coexpression,234;Enrichr Queries,106;GTEx Coexpression,1253	KLF10,BTG2,JUN,CEBPD,CXCL3,THBS1,GEM,ICAM1,NR4A2,NFKBIA,NR4A1,DUSP10,NR4A3,TUBA1A,IRF1,NFKBIZ,FOSB,BIRC3
426	IKZF4	531.7	ARCHS4 Coexpression,1012;Enrichr Queries,318;GTEx Coexpression,265	NANOS1,BTG2,EGR2,JUN,VDR,THBS1,PTBP3,NR4A2,NR4A1,NR4A3,TUBA1A,IRF1,LONP1,FOSB
427	ZNF468	532.3	ARCHS4 Coexpression,485;Enrichr Queries,452;GTEx Coexpression,660	KLF10,NR4A2,BTG2,JUN,NEURL4,HMGCS1,IRF1,THBS1,GEM,PTBP3,BIRC3
428	ZNF561	533	ARCHS4 Coexpression,294;Enrichr Queries,1137;GTEx Coexpression,168	NR4A2,BTG2,JUN,NEURL4,IRF6,THBS1,GULP1
429	ATOH8	533.3	ARCHS4 Coexpression,537;Enrichr Queries,240;GTEx Coexpression,823	BTG2,EGR2,JUN,EGR3,CEBPD,SDC4,IRX3,TNFAIP2,THBS1,NR4A1,NR4A3,FOSB
430	NR1H2	533.8	ARCHS4 Coexpression,70;Enrichr Queries,522;ReMap ChIP-seq,112;GTEx Coexpression,1431	JUN,BTG2,SDC4,CEBPD,CXCL2,TANK,STX11,ICAM1,RELB,NR4A2,NFKBIA,NR4A1,LYL1,ELF3,IRF1,NFKBIZ,LONP1,SMG7-AS1,FOSB
431	FOXN1	534	ARCHS4 Coexpression,382;Enrichr Queries,381;GTEx Coexpression,839	JAG2,NR4A1,BTG2,EGR2,EGR3,ELF3,VDR,IRF1,FOSB,IRF6,THBS1
432	ZNF613	535	ARCHS4 Coexpression,512;Enrichr Queries,429;GTEx Coexpression,664	IFIH1,NR4A2,NFKBIA,JUN,NEURL4,DUSP10,CEBPD,IRF1,AMD1,THBS1,ICAM1,BIRC3
433	ATF2	535.4	ARCHS4 Coexpression,638;ENCODE ChIP-seq,75;Enrichr Queries,1214;ReMap ChIP-seq,54;GTEx Coexpression,696	BRD2,BTG2,JUN,SKIDA1,THBS1,TANK,GEM,PTBP3,NFKBIA,NEURL4,DUSP10,NUAK2,NR4A3,TUBA1A,IRF1,NFKBIZ,FOSB,SMG7-AS1,NOL10,IRF6,NFKBIE
434	ZNF709	536.3	ARCHS4 Coexpression,275;Enrichr Queries,866;GTEx Coexpression,468	NR4A2,NR4A1,BTG2,TUBA1A,SKIDA1,SMG7-AS1,FOSB,THBS1
435	CEBPA	536.4	Literature ChIP-seq,101;ARCHS4 Coexpression,1413;Enrichr Queries,130;ReMap ChIP-seq,269;GTEx Coexpression,769	BTG2,EGR2,JUN,SDC4,CEBPD,SKIDA1,TNFAIP2,CXCL2,THBS1,STX11,ICAM1,NFKBIA,NR4A1,PLAU,IRF1,DPH3,LONP1,FOSB
436	YBX2	536.7	ARCHS4 Coexpression,618;Enrichr Queries,505;GTEx Coexpression,487	NR4A2,NR4A1,EGR2,JUN,EGR3,ELF3,IRX3,LONP1,SMG7-AS1,THBS1,FAM71A
437	CEBPZ	537	ARCHS4 Coexpression,365;ENCODE ChIP-seq,97;Enrichr Queries,1088;ReMap ChIP-seq,286;GTEx Coexpression,849	IFIH1,JUN,DUSP10,HMGCS1,AMD1,NOL10,ICAM1
438	ZNF679	537	ARCHS4 Coexpression,637;Enrichr Queries,550;GTEx Coexpression,424	NR4A2,EGR2,JUN,CEBPD,AMD1,SMG7-AS1,FOSB,THBS1,HSPA1B,BIRC3
439	PHOX2A	537.7	ARCHS4 Coexpression,786;Enrichr Queries,444;GTEx Coexpression,383	NR4A2,NR4A1,EGR2,JUN,EGR3,CEBPD,IRF1,IRX3,LONP1,THBS1
440	ZBTB7B	538	ARCHS4 Coexpression,1230;Enrichr Queries,114;GTEx Coexpression,270	KLF10,BTG2,JUN,CEBPD,SDC4,VDR,TNFAIP2,THBS1,ICAM1,NR4A2,NFKBIA,NR4A1,ELF3,IRF1,LONP1,FOSB,IRF6
441	TCF21	538	Literature ChIP-seq,3;ARCHS4 Coexpression,1303;Enrichr Queries,565;GTEx Coexpression,281	BTG2,EGR2,JUN,CEBPD,SDC4,VDR,AMD1,TNFAIP2,THBS1,CXCL2,GEM,STX11,ICAM1,NFKBIA,NR4A1,DUSP10,NR4A3,PLAU,IRF1,NFKBIZ,ADAM9,FOSB,CD59,NFKBIE
442	MYCN	538.4	Literature ChIP-seq,125;ARCHS4 Coexpression,1273;Enrichr Queries,461;ReMap ChIP-seq,228;GTEx Coexpression,605	BTG2,EGR2,JUN,SKIDA1,IRX3,MEPCE,TNFAIP2,THBS1,NR4A2,NR4A1,NEURL4,TUBA1A,IRF1,LONP1,FOSB,NFKBIE
443	ZNF598	538.7	ARCHS4 Coexpression,185;Enrichr Queries,1210;GTEx Coexpression,221	BRD2,JUN,NEURL4,LONP1,NOL10,IRF6,ELK1
444	HOXB4	538.8	Literature ChIP-seq,92;ARCHS4 Coexpression,800;Enrichr Queries,504;GTEx Coexpression,759	EGR2,JUN,EGR3,CEBPD,IRX3,AMD1,THBS1,ELK1,GEM,PTBP3,NR4A2,ELF3,IRF1,LONP1,FOSB
445	GLMP	539	ARCHS4 Coexpression,843;GTEx Coexpression,235	NEURL4,ADAM9,ICAM1
446	CIC	540.3	ARCHS4 Coexpression,538;Enrichr Queries,989;GTEx Coexpression,94	NFKBIA,BRD2,NR4A1,NEURL4,BTG2,JUN,MEPCE
447	ZFP42	540.5	Literature ChIP-seq,130;ARCHS4 Coexpression,725;Enrichr Queries,1179;GTEx Coexpression,128	BRD2,NUAK2,ELF3,MEPCE,DPH3,LONP1,SMG7-AS1,FSCN3,THBS1,GULP1
448	PAX9	540.7	ARCHS4 Coexpression,151;Enrichr Queries,554;GTEx Coexpression,917	NR4A2,JAG2,EGR2,JUN,EGR3,NR4A3,ELF3,IRX3,IRF6,THBS1
449	FOXN2	540.7	ARCHS4 Coexpression,555;Enrichr Queries,349;GTEx Coexpression,718	KLF10,BTG2,JUN,THBS1,STX11,PTBP3,NR4A2,NFKBIA,IRF1,NFKBIZ,LONP1,BIRC3
450	HES4	541	ARCHS4 Coexpression,1480;Enrichr Queries,22;GTEx Coexpression,121	BTG2,CEBPD,SDC4,TNFAIP2,CXCL1,CXCL2,THBS1,ICAM1,RELB,IFIH1,PLAU,NFKBIZ,LONP1,EGR2,JUN,GEM,NR4A2,NFKBIA,NR4A1,NR4A3,IRF1,FOSB,HSPA1B,BIRC3
451	SP4	541.2	ARCHS4 Coexpression,750;ENCODE ChIP-seq,104;Enrichr Queries,607;ReMap ChIP-seq,99;GTEx Coexpression,1146	KLF10,BRD2,JUN,BTG2,EGR2,SKIDA1,ELK1,THBS1,GEM,RELB,NR4A2,NR4A1,NEURL4,DUSP10,NUAK2,TUBA1A,LONP1,FOSB,IRF6,NFKBIE,HSPA1B
452	ZSCAN16	541.7	ARCHS4 Coexpression,243;Enrichr Queries,139;GTEx Coexpression,1243	BTG2,JUN,HMGCS1,THBS1,ICAM1,RELB,NR4A2,NFKBIA,NEURL4,DUSP10,TUBA1A,ELF3,IRF1,NFKBIZ,LONP1,BIRC3
453	ZNF700	542.3	ARCHS4 Coexpression,520;Enrichr Queries,518;GTEx Coexpression,589	NR4A2,BTG2,JUN,HMGCS1,NFKBIZ,FOSB,THBS1,ZBED5,PTBP3,BIRC3
454	ZNF335	543.5	ARCHS4 Coexpression,606;Enrichr Queries,862;ReMap ChIP-seq,297;GTEx Coexpression,409	KLF10,BRD2,EGR2,JUN,IRF1,ICAM1,RELB
455	ZNF705G	544	ARCHS4 Coexpression,934;GTEx Coexpression,154	SMG7-AS1,FSCN3,FAM71A
456	EVX2	545	ARCHS4 Coexpression,587;Enrichr Queries,994;GTEx Coexpression,54	NR4A2,EGR2,EGR3,IRX3,SMG7-AS1,FSCN3,FAM71A
457	PBX3	545.4	ARCHS4 Coexpression,821;ENCODE ChIP-seq,64;Enrichr Queries,463;ReMap ChIP-seq,6;GTEx Coexpression,1373	BTG2,ANKRD33B,MEPCE,AMD1,ELK1,THBS1,ICAM1,TUBA1A,DUSP10,LONP1,ZBED5,KLF10,JAG2,BRD2,JUN,EGR2,EGR3,HMGCS1,SKIDA1,IRX3,NFKBIA,NR4A2,NEURL4,NR4A3,IRF1,FOSB,NFKBIE,HSPA1B
458	GLYR1	545.7	ARCHS4 Coexpression,578;ReMap ChIP-seq,291;GTEx Coexpression,768	NANOS1,NEURL4,DPH3
459	ZNF121	546.7	ARCHS4 Coexpression,457;Enrichr Queries,911;GTEx Coexpression,272	JUN,HMGCS1,AMD1,LONP1,IRF6,THBS1,PTBP3,GULP1
460	FOXF2	548	ARCHS4 Coexpression,168;Enrichr Queries,375;GTEx Coexpression,1101	NR4A2,BRD2,EGR2,JUN,NEURL4,CEBPD,PLAU,IRX3,FOSB,CXCL1,THBS1,GEM
461	KLF17	548	ARCHS4 Coexpression,579;Enrichr Queries,920;GTEx Coexpression,145	NR4A1,EGR2,JUN,ELF3,CEBPD,AMD1,SMG7-AS1,FSCN3
462	ZNF354A	548.3	ARCHS4 Coexpression,478;Enrichr Queries,140;GTEx Coexpression,1027	KLF10,NANOS1,BTG2,JUN,HMGCS1,CEBPD,CXCL2,THBS1,GEM,NR4A2,NFKBIA,NR4A1,IRF1,LONP1,BIRC3
463	E2F4	549.8	Literature ChIP-seq,80;ARCHS4 Coexpression,326;ENCODE ChIP-seq,68;Enrichr Queries,1183;ReMap ChIP-seq,127;GTEx Coexpression,1515	KLF10,BRD2,JUN,EGR2,SKIDA1,MEPCE,AMD1,STX11,ICAM1,PTBP3,NR4A2,NFKBIA,LYL1,NEURL4,IRF1,LONP1,FOSB,NFKBIE,HSPA1B,BIRC3
464	MBD4	550	ARCHS4 Coexpression,639;ENCODE ChIP-seq,86;Enrichr Queries,600;ReMap ChIP-seq,108;GTEx Coexpression,1317	NANOS1,BRD2,BTG2,JUN,HMGCS1,AMD1,MEPCE,TANK,THBS1,NFKBIA,NEURL4,TUBA1A,IRF1,NFKBIZ,LONP1,SMG7-AS1,TRIM15,NOL10,NFKBIE,HSPA1B,BIRC3
465	FOXA2	551.7	Literature ChIP-seq,144;ARCHS4 Coexpression,1139;ENCODE ChIP-seq,82;Enrichr Queries,354;ReMap ChIP-seq,163;GTEx Coexpression,1428	BRD2,BTG2,JUN,SDC4,CEBPD,SKIDA1,IRX3,AMD1,THBS1,CXCL2,TANK,PTBP3,NR4A2,NFKBIA,NUAK2,DUSP10,ELF3,IRF1,NFKBIZ,FOSB,NOL10,BIRC3
466	ZNF296	551.7	ARCHS4 Coexpression,1114;Enrichr Queries,227;GTEx Coexpression,314	BTG2,JUN,CEBPD,THBS1,PTBP3,RELB,NFKBIA,ELF3,IRF1,LONP1,FOSB,NFKBIE,HSPA1B,BIRC3
467	ADNP2	552.3	ARCHS4 Coexpression,1126;Enrichr Queries,333;GTEx Coexpression,198	KLF10,BRD2,BTG2,JUN,THBS1,PTBP3,NR4A2,NFKBIA,NR4A1,DUSP10,LONP1,FOSB,IRF6
468	ZNF654	552.3	ARCHS4 Coexpression,445;Enrichr Queries,1052;GTEx Coexpression,160	KLF10,BTG2,JUN,TANK,THBS1,PTBP3
469	ISL2	552.7	ARCHS4 Coexpression,615;Enrichr Queries,219;GTEx Coexpression,824	BTG2,EGR2,JUN,EGR3,CEBPD,TNFRSF9,IRX3,THBS1,NR4A2,NR4A1,NR4A3,IRF1,LONP1,FOSB
470	NR5A2	553	ARCHS4 Coexpression,759;Enrichr Queries,231;ReMap ChIP-seq,212;GTEx Coexpression,1010	NANOS1,BTG2,EGR2,JUN,SDC4,VDR,TANK,CXCL2,THBS1,ICAM1,NR4A2,NEURL4,NUAK2,ELF3,PLAU,IRF1,LONP1
471	DLX3	553.3	ARCHS4 Coexpression,772;Enrichr Queries,258;GTEx Coexpression,630	JAG2,BTG2,EGR2,JUN,EGR3,VDR,IRX3,TNFAIP2,THBS1,NR4A2,NR4A1,ELF3,FOSB,IRF6
472	ZNF548	554	ARCHS4 Coexpression,683;Enrichr Queries,410;GTEx Coexpression,569	KLF10,NR4A2,NFKBIA,NR4A1,JUN,BTG2,FOSB,THBS1,ZBED5,BIRC3
473	PLAGL1	554.7	ARCHS4 Coexpression,882;Enrichr Queries,303;GTEx Coexpression,479	NR4A2,NR4A1,BTG2,EGR2,JUN,NR4A3,CEBPD,HMGCS1,NFKBIZ,FOSB,THBS1,GEM
474	ZBTB14	556.5	ARCHS4 Coexpression,209;GTEx Coexpression,904	MEPCE,PTBP3
475	NRF1	556.6	ARCHS4 Coexpression,279;ENCODE ChIP-seq,109;Enrichr Queries,921;ReMap ChIP-seq,247;GTEx Coexpression,1227	KLF10,BRD2,BTG2,JUN,SKIDA1,MEPCE,UBE2G2,ICAM1,RELB,NFKBIA,DUSP10,TUBA1A,IRF1,DPH3,FOSB,NFKBIE
476	HESX1	560	ARCHS4 Coexpression,1030;Enrichr Queries,343;GTEx Coexpression,307	EGR2,JUN,ANKRD33B,THBS1,ICAM1,GULP1,IFIH1,NR4A2,ELF3,IRF1,NFKBIZ,LONP1,FOSB
477	MBD3	560.5	ARCHS4 Coexpression,257;Enrichr Queries,1264;ReMap ChIP-seq,106;GTEx Coexpression,615	JAG2,BTG2,JUN,EGR3,SDC4,TNFAIP2,ICAM1,NR4A2,NR4A1,NEURL4,ELF3,LONP1,FOSB
478	ZNF136	561	ARCHS4 Coexpression,860;Enrichr Queries,451;GTEx Coexpression,372	IFIH1,KLF10,NFKBIA,BTG2,JUN,NEURL4,IRF1,ZBED5,THBS1,ICAM1,BIRC3
479	FOXP2	561	Literature ChIP-seq,21;ARCHS4 Coexpression,844;ENCODE ChIP-seq,89;Enrichr Queries,1256;ReMap ChIP-seq,204;GTEx Coexpression,952	JAG2,KLF10,BRD2,JUN,CEBPD,SKIDA1,MEPCE,THBS1,PTBP3,NR4A2,TUBA1A,DUSP10,FOSB,SMG7-AS1,IRF6,FAM71A
480	TFDP2	561.7	ARCHS4 Coexpression,660;Enrichr Queries,699;GTEx Coexpression,326	NFKBIA,BTG2,JUN,HMGCS1,IRF1,LONP1,SMG7-AS1,ADAM9,THBS1
481	DEAF1	561.8	ARCHS4 Coexpression,446;Enrichr Queries,799;ReMap ChIP-seq,287;GTEx Coexpression,715	NR4A2,KLF10,NR4A1,BTG2,EGR2,JUN,NEURL4,DUSP10,FOSB
482	FLYWCH1	565	ARCHS4 Coexpression,562;GTEx Coexpression,568	NEURL4
483	SPDEF	565.3	ARCHS4 Coexpression,831;Enrichr Queries,710;GTEx Coexpression,155	JUN,EGR3,ELF3,CEBPD,IRX3,AMD1,CXCL2,THBS1,ICAM1
484	MAZ	565.6	ARCHS4 Coexpression,181;ENCODE ChIP-seq,40;Enrichr Queries,1047;ReMap ChIP-seq,102;GTEx Coexpression,1458	KLF10,BRD2,JUN,ANKRD33B,SDC4,MEPCE,TNFAIP2,ELK1,GEM,ICAM1,RELB,NR4A2,NFKBIA,LYL1,NR4A1,NEURL4,TUBA1A,IRF1,LONP1,FOSB,ADAM9,NFKBIE,HSPA1B
485	FOXE1	566	ARCHS4 Coexpression,203;Enrichr Queries,566;GTEx Coexpression,929	NR4A2,JAG2,EGR2,JUN,EGR3,NR4A3,SDC4,IRX3,FOSB,IRF6,THBS1
486	ZNF76	566.3	ARCHS4 Coexpression,743;Enrichr Queries,845;GTEx Coexpression,111	NFKBIA,BRD2,NR4A1,NEURL4,BTG2,JUN,LONP1
487	ZNF286B	567	ARCHS4 Coexpression,261;GTEx Coexpression,873	TUBA1A,SKIDA1
488	DOT1L	567.3	ARCHS4 Coexpression,92;Enrichr Queries,435;GTEx Coexpression,1175	NR4A2,NFKBIA,BRD2,NR4A1,BTG2,JUN,NEURL4,SDC4,LONP1,FOSB,THBS1,ICAM1
489	GATA6	568.2	Literature ChIP-seq,14;ARCHS4 Coexpression,935;Enrichr Queries,195;ReMap ChIP-seq,90;GTEx Coexpression,1607	BTG2,SDC4,CEBPD,CXCL3,THBS1,ICAM1,NUAK2,PLAU,LONP1,SMG7-AS1,ZBED5,EGR2,JUN,ARL14,SKIDA1,GULP1,NR4A2,NFKBIA,NR4A1,ELF3,PDIK1L,IRF1,ADAM9,FOSB,BIRC3
490	ZNF92	568.3	ARCHS4 Coexpression,625;Enrichr Queries,711;ReMap ChIP-seq,238;GTEx Coexpression,699	JAG2,KLF10,BTG2,JUN,SDC4,HMGCS1,AMD1,THBS1,RELB,IFIH1,DUSP10,FOSB,BIRC3
491	ZNF740	568.3	ARCHS4 Coexpression,719;Enrichr Queries,1079;ReMap ChIP-seq,44;GTEx Coexpression,431	JAG2,BRD2,BTG2,JUN,SKIDA1,MEPCE,NR4A2,LYL1,NR4A1,NEURL4,IRF1,FOSB,NFKBIE,ZBED5,HSPA1B
492	EVX1	568.7	ARCHS4 Coexpression,782;Enrichr Queries,871;GTEx Coexpression,53	NR4A2,EGR2,EGR3,ELF3,IRF1,IRX3,AMD1,LONP1,FAM71A
493	SOX21	570.7	ARCHS4 Coexpression,419;Enrichr Queries,572;GTEx Coexpression,721	NR4A2,EGR2,JUN,EGR3,SDC4,HMGCS1,IRX3,SKIDA1,FOSB,IRF6,THBS1
494	ZNF761	572	ARCHS4 Coexpression,736;Enrichr Queries,656;GTEx Coexpression,324	NR4A1,BTG2,JUN,HMGCS1,AMD1,THBS1,ELK1,BIRC3
495	SP100	572	ARCHS4 Coexpression,642;Enrichr Queries,412;GTEx Coexpression,662	IFIH1,NFKBIA,JUN,PLAU,IRF1,NFKBIZ,TNFAIP2,THBS1,ICAM1,BIRC3
496	ETV5	573.3	ARCHS4 Coexpression,362;Enrichr Queries,126;GTEx Coexpression,1232	KLF10,BTG2,EGR2,JUN,EGR3,HMGCS1,SDC4,THBS1,GEM,ICAM1,NR4A2,NR4A1,PLAU,IRF1,LONP1,FOSB,ADAM9
497	LHX9	574	ARCHS4 Coexpression,792;Enrichr Queries,481;GTEx Coexpression,449	NR4A2,NR4A1,EGR2,JUN,EGR3,NR4A3,TUBA1A,IRX3,FOSB,THBS1
498	ZFP57	574.3	ARCHS4 Coexpression,1004;Enrichr Queries,181;GTEx Coexpression,538	BTG2,EGR2,JUN,CXCL1,THBS1,GEM,ICAM1,NR4A2,NFKBIA,NR4A1,LYL1,TUBA1A,NFKBIZ,LONP1,FOSB
499	MYBL2	574.7	Literature ChIP-seq,124;ARCHS4 Coexpression,997;ENCODE ChIP-seq,116;Enrichr Queries,1365;ReMap ChIP-seq,164;GTEx Coexpression,682	BRD2,JUN,SDC4,SKIDA1,MEPCE,ARHGAP5-AS1,TANK,PTBP3,NFKBIA,DUSP10,TUBA1A,NFKBIZ,LONP1,NFKBIE,HSPA1B
500	C11ORF95	575	GTEx Coexpression,575	PTBP3
501	SOX12	575.3	ARCHS4 Coexpression,763;Enrichr Queries,849;GTEx Coexpression,114	KLF10,NR4A1,NEURL4,BTG2,JUN,TUBA1A,SKIDA1,FOSB,THBS1
502	ARNT	579.6	Literature ChIP-seq,95;ARCHS4 Coexpression,1064;Enrichr Queries,810;ReMap ChIP-seq,195;GTEx Coexpression,734	KLF10,BTG2,JUN,EGR3,SDC4,VDR,TNFAIP2,UBE2G2,GULP1,NR4A2,NR4A1,NUAK2,ELF3,IRF1,FOSB
503	TBX18	581	ARCHS4 Coexpression,229;Enrichr Queries,1134;GTEx Coexpression,380	NR4A2,IRX3,ADAM9,THBS1,GULP1
504	HSF5	581.3	ARCHS4 Coexpression,906;Enrichr Queries,383;GTEx Coexpression,455	NR4A2,LYL1,BTG2,EGR2,JUN,EGR3,NR4A3,IRF1,SMG7-AS1,FOSB,FAM71A,ICAM1
505	RBPJ	582	Literature ChIP-seq,129;ARCHS4 Coexpression,521;Enrichr Queries,508;ReMap ChIP-seq,206;GTEx Coexpression,1546	KLF10,BTG2,JUN,CEBPD,MEPCE,ELK1,THBS1,ICAM1,NFKBIA,NEURL4,TUBA1A,IRF1,DPH3,LONP1,FOSB,IRF6
506	HOXD10	582.3	ARCHS4 Coexpression,224;Enrichr Queries,1041;GTEx Coexpression,482	NR4A2,BRD2,EGR2,NEURL4,PLAU,ZBED5,THBS1
507	MNT	583.3	ARCHS4 Coexpression,1220;Enrichr Queries,132;ReMap ChIP-seq,107;GTEx Coexpression,874	KLF10,BRD2,BTG2,EGR2,JUN,EGR3,SDC4,CEBPD,SKIDA1,THBS1,NFKBIA,NR4A2,NR4A1,NEURL4,ELF3,IRF1,LONP1,FOSB,HSPA1B
508	PHF1	584.5	ARCHS4 Coexpression,602;GTEx Coexpression,567	BRD2,FAM71A
509	TIGD5	585	ARCHS4 Coexpression,262;Enrichr Queries,970;GTEx Coexpression,523	BTG2,JUN,CEBPD,MEPCE,LONP1,FOSB,NOL10,THBS1
510	ZNF222	585.7	ARCHS4 Coexpression,495;Enrichr Queries,123;GTEx Coexpression,1139	BTG2,JUN,EGR3,HMGCS1,CEBPD,THBS1,GEM,ICAM1,IFIH1,NR4A2,NFKBIA,TUBA1A,IRF1,NFKBIZ,FOSB,BIRC3
511	ISX	585.7	ARCHS4 Coexpression,428;Enrichr Queries,1109;GTEx Coexpression,220	JUN,ARL14,ELF3,VDR,TRIM15,THBS1
512	HOXC8	586	ARCHS4 Coexpression,960;Enrichr Queries,673;GTEx Coexpression,125	BTG2,EGR2,JUN,CEBPD,PLAU,IRX3,ADAM9,NOL10,THBS1
513	SP3	587.3	ARCHS4 Coexpression,634;Enrichr Queries,955;GTEx Coexpression,173	NR4A2,KLF10,NFKBIA,BTG2,JUN,TANK,PTBP3
514	CEBPE	587.3	ARCHS4 Coexpression,963;Enrichr Queries,172;GTEx Coexpression,627	BTG2,EGR2,JUN,EGR3,CEBPD,TNFAIP2,THBS1,NR4A2,LYL1,NR4A1,PLAU,IRF1,LONP1,FOSB
515	FOXM1	588.2	Literature ChIP-seq,27;ARCHS4 Coexpression,798;ENCODE ChIP-seq,76;Enrichr Queries,1382;ReMap ChIP-seq,55;GTEx Coexpression,1191	BTG2,ANKRD33B,SDC4,TANK,THBS1,NUAK2,DUSP10,PLAU,NFKBIZ,LONP1,KLF10,NANOS1,JUN,EGR3,HMGCS1,SKIDA1,UBE2G2,GEM,GULP1,NFKBIA,NR4A2,NR4A3,ELF3,PDIK1L,FOSB,NOL10,NFKBIE
516	NFATC2	588.3	ARCHS4 Coexpression,728;Enrichr Queries,156;GTEx Coexpression,881	BTG2,EGR2,JUN,EGR3,THBS1,GEM,ICAM1,NR4A2,NR4A1,DUSP10,NR4A3,PLAU,IRF1,FOSB
517	ZNF677	589.7	ARCHS4 Coexpression,332;Enrichr Queries,1303;GTEx Coexpression,134	NEURL4,TUBA1A,SMG7-AS1,FOSB,FSCN3,THBS1
518	POGK	589.7	ARCHS4 Coexpression,658;Enrichr Queries,698;GTEx Coexpression,413	NR4A2,NFKBIA,BTG2,JUN,NEURL4,TUBA1A,DUSP10,LONP1,THBS1
519	ZNF669	590.7	ARCHS4 Coexpression,553;Enrichr Queries,581;GTEx Coexpression,638	KLF10,NR4A2,NFKBIA,BTG2,JUN,NEURL4,IRF1,TANK,THBS1,BIRC3
520	FOXO3	591	Literature ChIP-seq,87;ARCHS4 Coexpression,1166;Enrichr Queries,321;GTEx Coexpression,790	KLF10,BTG2,JUN,CEBPD,SDC4,TANK,THBS1,NR4A2,NFKBIA,NR4A1,ELF3,IRF1,LONP1,ZBED5
521	MITF	591	Literature ChIP-seq,83;ARCHS4 Coexpression,1302;Enrichr Queries,364;ReMap ChIP-seq,152;GTEx Coexpression,1054	ANKRD33B,CEBPD,SDC4,MEPCE,AMD1,TNFAIP2,THBS1,ICAM1,RELB,PLAU,NFKBIZ,DPH3,LONP1,CD59,KLF10,JAG2,BRD2,EGR2,JUN,HMGCS1,SKIDA1,GEM,NR4A2,NFKBIA,NR4A1,NR4A3,ELF3,PDIK1L,FOSB,NFKBIE
522	ZNF223	591.7	ARCHS4 Coexpression,518;Enrichr Queries,582;GTEx Coexpression,675	NFKBIA,BTG2,JUN,TUBA1A,CEBPD,PDIK1L,NFKBIZ,THBS1,BIRC3
523	KLF15	591.7	ARCHS4 Coexpression,1071;Enrichr Queries,386;GTEx Coexpression,318	NFKBIA,NR4A1,BTG2,EGR2,JUN,CEBPD,SDC4,LONP1,FOSB,THBS1,PTBP3
524	LYL1	592	Literature ChIP-seq,62;ARCHS4 Coexpression,1050;Enrichr Queries,631;ReMap ChIP-seq,224;GTEx Coexpression,993	BTG2,JUN,EGR3,CEBPD,TNFAIP2,GEM,ICAM1,NFKBIA,LYL1,IRF1,LONP1,NFKBIE,FAM71A
525	ZNF496	592.7	ARCHS4 Coexpression,430;Enrichr Queries,843;GTEx Coexpression,505	NANOS1,BRD2,NR4A1,BTG2,JUN,IRF1,LONP1,THBS1
526	STAT6	593.5	Literature ChIP-seq,146;ARCHS4 Coexpression,1070;Enrichr Queries,208;GTEx Coexpression,950	BTG2,JUN,EGR2,CEBPD,SDC4,VDR,TNFAIP2,THBS1,ICAM1,NFKBIA,TUBA1A,IRF1,LONP1,BIRC3
527	ZNF140	594	ARCHS4 Coexpression,1538;Enrichr Queries,127;GTEx Coexpression,117	KLF10,BRD2,BTG2,JUN,HMGCS1,CEBPD,THBS1,TANK,NR4A2,NFKBIA,NR4A1,DUSP10,IRF1,FOSB,ZBED5,BIRC3
528	ZSCAN23	594.3	ARCHS4 Coexpression,121;Enrichr Queries,1182;GTEx Coexpression,480	JUN,NR4A3,TUBA1A,HMGCS1,SKIDA1,ADAM9
529	ZNF584	594.5	ARCHS4 Coexpression,1147;Enrichr Queries,433;ReMap ChIP-seq,143;GTEx Coexpression,655	KLF10,BRD2,BTG2,JUN,EGR3,CEBPD,UBE2G2,CXCL3,CXCL2,THBS1,NR4A1,NUAK2,PDIK1L,IRF1,LONP1,FOSB,NOL10,FAM71A,HSPA1B
530	WT1	595	Literature ChIP-seq,12;ARCHS4 Coexpression,704;Enrichr Queries,246;GTEx Coexpression,1418	KLF10,NANOS1,BRD2,BTG2,EGR2,JUN,EGR3,CEBPD,VDR,IRX3,THBS1,ELK1,ICAM1,PTBP3,RELB,NR4A2,NR4A1,PLAU,FOSB
531	ZKSCAN4	595	ARCHS4 Coexpression,1095;Enrichr Queries,198;GTEx Coexpression,492	BTG2,JUN,CEBPD,MEPCE,THBS1,GEM,IFIH1,NR4A2,NFKBIA,NR4A1,IRF1,LONP1,FOSB,BIRC3
532	ZNF750	595.3	ARCHS4 Coexpression,892;Enrichr Queries,609;ReMap ChIP-seq,233;GTEx Coexpression,647	BTG2,JUN,EGR3,SDC4,ELF3,CEBPD,IRX3,FOSB,IRF6,THBS1
533	NFIB	596	Literature ChIP-seq,99;ARCHS4 Coexpression,696;Enrichr Queries,1045;GTEx Coexpression,544	NR4A2,JUN,BTG2,TUBA1A,VDR,THBS1
534	ZNF33B	596	ARCHS4 Coexpression,254;Enrichr Queries,573;GTEx Coexpression,961	NR4A2,NFKBIA,BTG2,JUN,CEBPD,LONP1,THBS1,ELK1,PTBP3,BIRC3
535	MYOD1	596.2	ARCHS4 Coexpression,1081;ENCODE ChIP-seq,85;Enrichr Queries,283;ReMap ChIP-seq,116;GTEx Coexpression,1416	JAG2,NANOS1,KLF10,BTG2,EGR2,JUN,SDC4,CEBPD,VDR,IRX3,THBS1,NR4A2,NR4A1,NR4A3,PLAU,IRF1,FOSB,NFKBIE,FAM71A
536	SOX1	596.3	ARCHS4 Coexpression,183;Enrichr Queries,1002;GTEx Coexpression,604	NR4A2,EGR2,JUN,TUBA1A,HMGCS1,IRX3,SKIDA1
537	ZNF383	596.3	ARCHS4 Coexpression,1337;Enrichr Queries,263;GTEx Coexpression,189	KLF10,BTG2,EGR2,JUN,HMGCS1,CEBPD,TANK,THBS1,NFKBIA,DUSP10,PLAU,FOSB,NOL10,BIRC3
538	CTCF	596.7	Literature ChIP-seq,43;ARCHS4 Coexpression,953;ENCODE ChIP-seq,14;Enrichr Queries,1270;ReMap ChIP-seq,133;GTEx Coexpression,1167	BTG2,CEBPD,MEPCE,TNFAIP2,CXCL3,CXCL2,THBS1,IFIH1,LYL1,DUSP10,TUBA1A,DPH3,JAG2,BRD2,JUN,EGR3,GULP1,NR4A1,NEURL4,MTNR1A,ELF3,PDIK1L,IRF1,FOSB,NFKBIE,BIRC3
539	TCF4	597.2	Literature ChIP-seq,117;ARCHS4 Coexpression,617;Enrichr Queries,816;ReMap ChIP-seq,24;GTEx Coexpression,1412	JAG2,JUN,BTG2,EGR3,SDC4,VDR,TNFRSF9,TNFAIP2,CXCL3,CXCL2,THBS1,TANK,PTBP3,NR4A2,NFKBIA,DUSP10,NUAK2,NR4A3,TUBA1A,ELF3,IRF1,NFKBIZ,SMG7-AS1
540	FOXD3	598.3	ARCHS4 Coexpression,841;Enrichr Queries,750;GTEx Coexpression,204	NR4A2,EGR2,JUN,EGR3,IRX3,THBS1,GULP1
541	ZNF358	598.3	ARCHS4 Coexpression,528;Enrichr Queries,935;GTEx Coexpression,332	NFKBIA,JUN,NEURL4,TUBA1A,CEBPD,THBS1,PTBP3
542	NR2F1	598.5	ARCHS4 Coexpression,278;Enrichr Queries,569;ReMap ChIP-seq,266;GTEx Coexpression,1281	JAG2,EGR2,JUN,CEBPD,HMGCS1,IRX3,TNFAIP2,THBS1,ICAM1,NR4A2,LYL1,NR4A1,TUBA1A
543	ALX3	598.7	ARCHS4 Coexpression,434;Enrichr Queries,742;GTEx Coexpression,620	JAG2,NR4A2,EGR2,JUN,NEURL4,EGR3,LONP1,FOSB,THBS1
544	ZNF518B	599.7	ARCHS4 Coexpression,542;Enrichr Queries,840;GTEx Coexpression,417	BTG2,JUN,HMGCS1,SKIDA1,DPH3,NFKBIZ,LONP1,THBS1
545	CBX2	600	ARCHS4 Coexpression,1282;ENCODE ChIP-seq,92;Enrichr Queries,1212;ReMap ChIP-seq,181;GTEx Coexpression,233	BRD2,BTG2,JUN,ANKRD33B,VDR,TNFRSF9,CXCL1,THBS1,GEM,STX11,NR4A1,NR4A3,TUBA1A,NUAK2,SMG7-AS1,FSCN3,NOL10,FAM71A
546	ZFPM1	601.7	ARCHS4 Coexpression,292;Enrichr Queries,428;GTEx Coexpression,1085	KLF10,NR4A2,NR4A1,BTG2,EGR2,JUN,CEBPD,MEPCE,LONP1,FOSB,THBS1
547	ZNF74	603	ARCHS4 Coexpression,88;Enrichr Queries,1170;GTEx Coexpression,551	NEURL4,BTG2,JUN,TUBA1A,SKIDA1,ADAM9,CD59,THBS1
548	ZNF79	605	ARCHS4 Coexpression,1057;Enrichr Queries,210;GTEx Coexpression,548	BRD2,BTG2,EGR2,JUN,SDC4,THBS1,ICAM1,RELB,NR4A2,NFKBIA,IRF1,FOSB,NOL10,BIRC3
549	MYCL	605.5	ARCHS4 Coexpression,945;GTEx Coexpression,266	NUAK2,IRX3,IRF6
550	TBX3	607	Literature ChIP-seq,150;ARCHS4 Coexpression,1359;Enrichr Queries,591;GTEx Coexpression,328	NR4A2,BTG2,EGR2,JUN,CEBPD,SDC4,IRX3,LONP1,THBS1
551	TIGD4	607.3	ARCHS4 Coexpression,473;Enrichr Queries,1034;GTEx Coexpression,315	NR4A2,EGR2,NR4A3,HMGCS1,SMG7-AS1,GEM
552	HIC1	607.7	ARCHS4 Coexpression,136;Enrichr Queries,153;GTEx Coexpression,1534	BRD2,BTG2,EGR2,JUN,EGR3,ANKRD33B,CEBPD,TNFAIP2,THBS1,GEM,ICAM1,NR4A2,NR4A1,NR4A3,PLAU,FOSB,NFKBIE
553	FOXO6	607.7	ARCHS4 Coexpression,1007;Enrichr Queries,326;GTEx Coexpression,490	BTG2,EGR2,JUN,ANKRD33B,EGR3,IRX3,THBS1,NR4A2,NR4A1,NEURL4,NR4A3,FOSB,FAM71A
554	TLX1	608	ARCHS4 Coexpression,380;Enrichr Queries,743;GTEx Coexpression,701	NR4A2,EGR2,JUN,EGR3,NR4A3,IRX3,CXCL1,IRF6,ELK1
555	ZNF678	608	ARCHS4 Coexpression,531;Enrichr Queries,1209;GTEx Coexpression,84	JUN,DUSP10,UBE2G2,ZBED5,THBS1,GULP1
556	HOXB6	608.7	ARCHS4 Coexpression,1156;Enrichr Queries,367;GTEx Coexpression,303	EGR2,JUN,CEBPD,VDR,IRX3,TNFAIP2,THBS1,NR4A2,PLAU,IRF1,FOSB,TRIM15
557	MYBL1	609	Literature ChIP-seq,110;ARCHS4 Coexpression,519;Enrichr Queries,803;GTEx Coexpression,1004	NR4A2,BTG2,EGR2,JUN,PLAU,ADAM9,THBS1
558	VEZF1	609.7	ARCHS4 Coexpression,440;Enrichr Queries,636;GTEx Coexpression,753	KLF10,NFKBIA,BRD2,BTG2,JUN,TUBA1A,SDC4,DPH3,LONP1,THBS1
559	SOX15	609.7	ARCHS4 Coexpression,415;Enrichr Queries,586;GTEx Coexpression,828	JAG2,NR4A1,JUN,ELF3,SDC4,PLAU,LONP1,IRF6,THBS1
560	NR2F2	609.8	ARCHS4 Coexpression,1565;ENCODE ChIP-seq,77;Enrichr Queries,780;ReMap ChIP-seq,21;GTEx Coexpression,606	BTG2,SDC4,CEBPD,MEPCE,TNFAIP2,THBS1,CXCL2,ICAM1,PLAU,DPH3,ZBED5,BRD2,JUN,SKIDA1,IRX3,UBE2G2,GULP1,NR4A2,ELF3,PDIK1L,IRF1,FOSB,NOL10,NFKBIE,HSPA1B
561	ZNF583	610.7	ARCHS4 Coexpression,1125;Enrichr Queries,459;GTEx Coexpression,248	NR4A2,BTG2,JUN,DUSP10,NR4A3,HMGCS1,FOSB,IRF6,THBS1,GEM,PTBP3
562	ZFP62	610.7	ARCHS4 Coexpression,530;Enrichr Queries,605;GTEx Coexpression,697	KLF10,NFKBIA,BTG2,JUN,TUBA1A,SDC4,IRF1,ZBED5,THBS1,PTBP3
563	THAP11	611	Literature ChIP-seq,149;ARCHS4 Coexpression,251;Enrichr Queries,1107;ReMap ChIP-seq,283;GTEx Coexpression,1265	NFKBIA,BRD2,LYL1,JUN,IRF1,MEPCE,LONP1,FOSB
564	OLIG2	611.3	Literature ChIP-seq,49;ARCHS4 Coexpression,1531;Enrichr Queries,446;GTEx Coexpression,419	KLF10,JAG2,EGR2,JUN,BTG2,EGR3,CEBPD,SDC4,TNFRSF9,UBE2G2,THBS1,CXCL2,TANK,NR4A2,NR4A1,NUAK2,PLAU,DPH3,FOSB
565	ZFP82	611.7	ARCHS4 Coexpression,247;Enrichr Queries,368;GTEx Coexpression,1220	NFKBIA,NR4A1,BTG2,EGR2,JUN,NEURL4,TUBA1A,LONP1,THBS1,ICAM1,BIRC3,RELB
566	PGR	612.3	ARCHS4 Coexpression,1336;Enrichr Queries,464;ReMap ChIP-seq,203;GTEx Coexpression,446	BTG2,EGR2,JUN,EGR3,SDC4,VDR,THBS1,GULP1,NFKBIA,NR4A2,NR4A1,NR4A3,IRF1,CD59
567	ZNF182	613	ARCHS4 Coexpression,316;Enrichr Queries,1187;GTEx Coexpression,336	NR4A1,BTG2,JUN,ZBED5,PTBP3,RELB
568	ZNF235	613.3	ARCHS4 Coexpression,450;Enrichr Queries,422;GTEx Coexpression,968	IFIH1,NR4A2,NR4A1,BTG2,EGR2,JUN,NEURL4,CEBPD,IRF1,THBS1,BIRC3
569	SMAD4	613.6	Literature ChIP-seq,48;ARCHS4 Coexpression,1048;Enrichr Queries,980;ReMap ChIP-seq,179;GTEx Coexpression,813	KLF10,BTG2,JUN,ARL14,SKIDA1,THBS1,NFKBIA,NEURL4,NUAK2,NR4A3,PDIK1L,IRF1,CD59,ZBED5,FAM71A
570	ZNF155	614	ARCHS4 Coexpression,516;Enrichr Queries,545;GTEx Coexpression,781	IFIH1,NR4A2,NANOS1,JUN,EGR3,CEBPD,FOSB,TANK,THBS1,BIRC3
571	SNAPC4	614.8	ARCHS4 Coexpression,442;Enrichr Queries,1046;ReMap ChIP-seq,276;GTEx Coexpression,695	BRD2,JUN,NEURL4,ELF3,HMGCS1,IRF1,MEPCE,LONP1,FOSB
572	REXO4	616	ARCHS4 Coexpression,825;GTEx Coexpression,407	LONP1,NOL10
573	MXD4	617.3	ARCHS4 Coexpression,499;Enrichr Queries,499;GTEx Coexpression,854	NFKBIA,BTG2,JUN,NEURL4,TUBA1A,CEBPD,SDC4,IRF1,LONP1,THBS1
574	ZNF705B	617.5	ARCHS4 Coexpression,799;GTEx Coexpression,436	JUN,FSCN3
575	PAX6	619	Literature ChIP-seq,100;ARCHS4 Coexpression,815;Enrichr Queries,773;ReMap ChIP-seq,183;GTEx Coexpression,1224	JAG2,JUN,BTG2,EGR2,EGR3,SKIDA1,MEPCE,THBS1,GEM,NR4A2,TUBA1A,PLAU,NFKBIZ,ADAM9,ZBED5
576	FOXK2	619.5	ARCHS4 Coexpression,422;Enrichr Queries,1388;ReMap ChIP-seq,199;GTEx Coexpression,469	NR4A2,BRD2,BTG2,JUN,NEURL4,AMD1,MEPCE,LONP1,FOSB,NOL10,HSPA1B
577	PURG	619.5	ARCHS4 Coexpression,124;GTEx Coexpression,1115	TUBA1A,HMGCS1,SKIDA1
578	ZNF180	621	ARCHS4 Coexpression,211;Enrichr Queries,478;GTEx Coexpression,1174	KLF10,NR4A2,NR4A1,BTG2,JUN,NEURL4,TUBA1A,HMGCS1,FOSB,THBS1,ZBED5
579	YY1	621.3	Literature ChIP-seq,103;ARCHS4 Coexpression,1025;ENCODE ChIP-seq,83;Enrichr Queries,985;ReMap ChIP-seq,140;GTEx Coexpression,1392	BRD2,BTG2,JUN,VDR,SKIDA1,AMD1,PTBP3,NFKBIA,LYL1,NEURL4,TUBA1A,ELF3,IRF1,DPH3,LONP1,FOSB,SMG7-AS1,NOL10,NFKBIE,HSPA1B
580	HOXA5	622.3	ARCHS4 Coexpression,1333;Enrichr Queries,204;GTEx Coexpression,330	BTG2,EGR2,JUN,EGR3,CEBPD,IRX3,CXCL2,THBS1,ICAM1,NR4A2,NFKBIA,IRF1,LONP1,FOSB
581	RAX	622.3	ARCHS4 Coexpression,123;Enrichr Queries,875;GTEx Coexpression,869	NR4A2,EGR2,EGR3,ANKRD33B,NUAK2,IRX3,SKIDA1,FOSB
582	HIVEP2	623.3	ARCHS4 Coexpression,626;Enrichr Queries,47;GTEx Coexpression,1197	KLF10,BTG2,EGR2,JUN,EGR3,SDC4,TNFAIP2,THBS1,GEM,ICAM1,NR4A2,NFKBIA,NR4A1,DUSP10,NR4A3,IRF1,NFKBIZ,LONP1,FOSB,BIRC3
583	ZIK1	624.7	ARCHS4 Coexpression,114;Enrichr Queries,802;GTEx Coexpression,958	NR4A1,BTG2,EGR2,JUN,TUBA1A,SKIDA1,THBS1,GEM,GULP1
584	ZNF197	625	ARCHS4 Coexpression,117;Enrichr Queries,1138;ReMap ChIP-seq,82;GTEx Coexpression,1163	BTG2,JUN,HMGCS1,SKIDA1,UBE2G2,CXCL3,CXCL2,ELK1,PTBP3,LYL1,TUBA1A,IRF1,LONP1,ADAM9
585	ZBTB25	625.7	ARCHS4 Coexpression,1540;Enrichr Queries,86;GTEx Coexpression,251	KLF10,BTG2,EGR2,JUN,CEBPD,THBS1,GEM,IFIH1,NR4A2,NFKBIA,NR4A1,DUSP10,NR4A3,IRF1,NFKBIZ,LONP1,FOSB,NFKBIE,BIRC3
586	ZBTB43	627.7	ARCHS4 Coexpression,223;Enrichr Queries,87;GTEx Coexpression,1573	KLF10,BRD2,BTG2,JUN,SDC4,THBS1,GEM,NR4A2,NFKBIA,NR4A1,NEURL4,DUSP10,NR4A3,IRF1,NFKBIZ,LONP1,FOSB,BIRC3
587	HOXA1	627.7	ARCHS4 Coexpression,1074;Enrichr Queries,152;GTEx Coexpression,657	BTG2,EGR2,JUN,EGR3,VDR,IRX3,CXCL1,CXCL2,THBS1,PTBP3,ICAM1,NR4A2,PLAU,IRF1,FOSB
588	GCM1	628	ARCHS4 Coexpression,1085;Enrichr Queries,138;GTEx Coexpression,661	BTG2,EGR2,JUN,EGR3,CEBPD,THBS1,STX11,GEM,ICAM1,NR4A2,NR4A1,NR4A3,ELF3,IRF1,FOSB
589	ZNF775	628	ARCHS4 Coexpression,1314;Enrichr Queries,377;GTEx Coexpression,193	KLF10,BTG2,EGR2,JUN,CEBPD,SDC4,NR4A1,NEURL4,TUBA1A,IRF1,LONP1,CD59
590	SETDB2	628.3	ARCHS4 Coexpression,1409;Enrichr Queries,347;GTEx Coexpression,129	BRD2,BTG2,EGR2,JUN,HMGCS1,THBS1,ICAM1,IFIH1,NFKBIA,IRF1,LONP1,ZBED5,BIRC3
591	HOXA2	628.5	Literature ChIP-seq,163;ARCHS4 Coexpression,1430;Enrichr Queries,558;GTEx Coexpression,363	NR4A2,EGR2,JUN,EGR3,PLAU,IRX3,FOSB,THBS1,GULP1
592	ZNF705A	630	ARCHS4 Coexpression,987;Enrichr Queries,535;GTEx Coexpression,368	NR4A1,EGR2,PLAU,NFKBIZ,TNFAIP2,SMG7-AS1,CXCL3,CXCL2,FAM71A,ICAM1
593	ADNP	630.3	ARCHS4 Coexpression,573;Enrichr Queries,1356;ReMap ChIP-seq,237;GTEx Coexpression,355	BRD2,LYL1,IRF1,SKIDA1,FOSB,ICAM1,RELB
594	ZEB2	631.3	ARCHS4 Coexpression,1142;Enrichr Queries,786;ReMap ChIP-seq,149;GTEx Coexpression,448	BTG2,EGR2,JUN,SDC4,CXCL3,THBS1,ICAM1,NR4A2,TUBA1A,PDIK1L,IRF1,FOSB,HSPA1B
595	PITX1	631.3	ARCHS4 Coexpression,871;Enrichr Queries,317;GTEx Coexpression,706	JAG2,EGR2,JUN,EGR3,CEBPD,VDR,IRX3,THBS1,NUAK2,ELF3,PLAU,IRF1,FOSB
596	MIXL1	631.3	ARCHS4 Coexpression,1261;Enrichr Queries,362;GTEx Coexpression,271	BTG2,EGR2,JUN,EGR3,IRX3,IFIH1,NR4A2,DUSP10,NR4A3,ELF3,IRF1,NFKBIE
597	ZNF254	631.3	ARCHS4 Coexpression,489;Enrichr Queries,815;GTEx Coexpression,590	BTG2,JUN,DUSP10,TUBA1A,HMGCS1,ZBED5,THBS1,BIRC3
598	ZNF214	632.3	ARCHS4 Coexpression,225;Enrichr Queries,1142;GTEx Coexpression,530	TUBA1A,CEBPD,SKIDA1,THBS1,GULP1
599	CTCFL	633.6	ARCHS4 Coexpression,1321;ENCODE ChIP-seq,52;Enrichr Queries,293;ReMap ChIP-seq,121;GTEx Coexpression,1381	BTG2,SDC4,MEPCE,CXCL1,CXCL3,THBS1,CXCL2,ICAM1,IFIH1,LYL1,NUAK2,LONP1,JAG2,JUN,EGR2,VDR,SKIDA1,GULP1,NR4A2,NFKBIA,NR4A1,NEURL4,NR4A3,ELF3,IRF1,FOSB,NFKBIE
600	PDX1	634.2	Literature ChIP-seq,131;ARCHS4 Coexpression,1096;Enrichr Queries,740;ReMap ChIP-seq,174;GTEx Coexpression,1030	KLF10,JUN,EGR2,EGR3,VDR,PTBP3,NR4A2,NR4A1,DUSP10,NUAK2,ELF3,NFKBIZ,DPH3,FOSB
601	DLX2	635.7	ARCHS4 Coexpression,593;Enrichr Queries,256;GTEx Coexpression,1058	KLF10,BTG2,EGR2,JUN,EGR3,THBS1,GEM,NR4A2,NR4A1,NR4A3,TUBA1A,LONP1,FOSB
602	ZNF181	636	ARCHS4 Coexpression,471;Enrichr Queries,659;GTEx Coexpression,778	KLF10,BTG2,JUN,PDIK1L,THBS1,ZBED5,PTBP3,BIRC3
603	ONECUT1	636.3	ARCHS4 Coexpression,913;Enrichr Queries,363;ReMap ChIP-seq,169;GTEx Coexpression,1100	KLF10,BTG2,EGR2,JUN,EGR3,CEBPD,SKIDA1,IRX3,CXCL1,ARHGAP5-AS1,CXCL3,CXCL2,THBS1,NR4A2,NR4A1,DUSP10,TUBA1A,NFKBIZ,FOSB
604	TCFL5	636.7	ARCHS4 Coexpression,215;Enrichr Queries,480;GTEx Coexpression,1215	KLF10,NR4A2,NFKBIA,EGR2,JUN,EGR3,SDC4,LONP1,FOSB,THBS1,ELK1
605	ZNF777	636.7	ARCHS4 Coexpression,80;Enrichr Queries,863;GTEx Coexpression,967	BRD2,NR4A1,JUN,NEURL4,CEBPD,MEPCE,LONP1,THBS1,ELK1
606	ZNF205	636.7	ARCHS4 Coexpression,171;Enrichr Queries,818;GTEx Coexpression,921	JAG2,NR4A1,BTG2,JUN,NEURL4,IRF1,LONP1,FOSB,RELB
607	ZHX1	636.8	ARCHS4 Coexpression,1083;Enrichr Queries,847;ReMap ChIP-seq,75;GTEx Coexpression,542	KLF10,BRD2,BTG2,JUN,ANKRD33B,EGR3,MEPCE,TNFAIP2,THBS1,ICAM1,NFKBIA,LYL1,NR4A1,TUBA1A,ELF3,PDIK1L,FOSB,HSPA1B
608	TCF12	637	ARCHS4 Coexpression,299;ENCODE ChIP-seq,29;Enrichr Queries,1203;ReMap ChIP-seq,51;GTEx Coexpression,1603	JUN,BTG2,ANKRD33B,HMGCS1,SKIDA1,TNFAIP2,UBE2G2,THBS1,GEM,ICAM1,NFKBIA,LYL1,NR4A1,NEURL4,NUAK2,DUSP10,TUBA1A,PLAU,IRF1,LONP1,FOSB,NFKBIE,BIRC3
609	ZIC2	639	ARCHS4 Coexpression,337;Enrichr Queries,718;GTEx Coexpression,862	NR4A2,EGR2,JUN,EGR3,IRX3,SKIDA1,FOSB,THBS1,GULP1
610	NKX31	639.5	ARCHS4 Coexpression,846;GTEx Coexpression,433	AMD1
611	ZNF582	640	ARCHS4 Coexpression,1239;Enrichr Queries,618;GTEx Coexpression,63	NR4A2,JUN,NR4A3,ELF3,NFKBIZ,FOSB,IRF6,THBS1,PTBP3,ICAM1,BIRC3
612	FOXG1	640	ARCHS4 Coexpression,126;Enrichr Queries,671;GTEx Coexpression,1123	NR4A2,EGR2,JUN,EGR3,NR4A3,TUBA1A,HMGCS1,IRX3,SKIDA1,THBS1
613	ETV4	640.5	ARCHS4 Coexpression,1044;Enrichr Queries,705;ReMap ChIP-seq,201;GTEx Coexpression,612	BRD2,JUN,EGR2,SDC4,SKIDA1,TNFAIP2,THBS1,PTBP3,NR4A1,PLAU,FOSB,NFKBIE,HSPA1B
614	ZFP37	641.3	ARCHS4 Coexpression,447;Enrichr Queries,557;GTEx Coexpression,920	NR4A2,NR4A1,BTG2,EGR2,JUN,TUBA1A,FOSB,THBS1,GEM
615	ZNF479	641.3	ARCHS4 Coexpression,481;Enrichr Queries,1333;GTEx Coexpression,110	JUN,SMG7-AS1,FSCN3
616	NFAT5	642	ARCHS4 Coexpression,1049;Enrichr Queries,401;GTEx Coexpression,476	NR4A2,KLF10,NFKBIA,BTG2,JUN,SDC4,IRF1,NFKBIZ,FOSB,THBS1
617	ZNF133	642	ARCHS4 Coexpression,812;Enrichr Queries,708;GTEx Coexpression,406	NFKBIA,NEURL4,JUN,TUBA1A,HMGCS1,SDC4,IRF1,LONP1,THBS1
618	ZNF513	642.3	ARCHS4 Coexpression,849;Enrichr Queries,931;GTEx Coexpression,147	BRD2,EGR2,JUN,IRF1,MEPCE,FOSB,FAM71A,ICAM1
619	SALL1	642.5	Literature ChIP-seq,44;ARCHS4 Coexpression,926;Enrichr Queries,924;GTEx Coexpression,676	NR4A2,BTG2,EGR2,JUN,MTNR1A,HMGCS1,SKIDA1,IRX3,PTBP3
620	FEZF1	642.7	ARCHS4 Coexpression,169;Enrichr Queries,1245;GTEx Coexpression,514	NR4A2,TUBA1A,IRX3,SKIDA1,GULP1
621	ZNF646	642.7	ARCHS4 Coexpression,377;Enrichr Queries,814;GTEx Coexpression,737	KLF10,BRD2,BTG2,JUN,NEURL4,CEBPD,SMG7-AS1,THBS1
622	MSANTD4	643	ARCHS4 Coexpression,948;GTEx Coexpression,338	TUBA1A,DPH3
623	POU5F1B	643	ARCHS4 Coexpression,811;GTEx Coexpression,475	PTBP3,GULP1
624	SOX10	643.3	ARCHS4 Coexpression,1583;Enrichr Queries,562;ReMap ChIP-seq,292;GTEx Coexpression,136	NR4A2,NR4A1,EGR2,JUN,TUBA1A,EGR3,CEBPD,SDC4,FOSB
625	SCML4	643.3	ARCHS4 Coexpression,282;Enrichr Queries,637;GTEx Coexpression,1011	NR4A2,NFKBIA,BTG2,EGR2,JUN,EGR3,IRF1,THBS1,BIRC3
626	HOXB1	644	ARCHS4 Coexpression,852;Enrichr Queries,776;GTEx Coexpression,304	NR4A2,EGR2,JUN,NUAK2,EGR3,IRX3,SKIDA1,IRF6,THBS1
627	POU2F3	644.7	ARCHS4 Coexpression,1579;Enrichr Queries,125;GTEx Coexpression,230	BTG2,EGR2,JUN,EGR3,CEBPD,SDC4,VDR,IRX3,THBS1,NR4A2,NFKBIA,NR4A1,ELF3,IRF1,FOSB,IRF6
628	ZNF334	645.7	ARCHS4 Coexpression,536;Enrichr Queries,830;GTEx Coexpression,571	NR4A1,NEURL4,EGR2,EGR3,NR4A3,TUBA1A,FOSB,CXCL1
629	ZNF438	645.7	ARCHS4 Coexpression,479;Enrichr Queries,492;GTEx Coexpression,966	IFIH1,BTG2,EGR2,JUN,CEBPD,IRF1,THBS1,STX11,ICAM1,BIRC3
630	REPIN1	646	ARCHS4 Coexpression,280;Enrichr Queries,389;GTEx Coexpression,1269	KLF10,NFKBIA,BRD2,BTG2,JUN,NEURL4,TUBA1A,SDC4,IRF1,LONP1,THBS1
631	KLF16	646.7	ARCHS4 Coexpression,138;Enrichr Queries,424;GTEx Coexpression,1378	KLF10,NR4A2,BRD2,NR4A1,BTG2,EGR2,JUN,NEURL4,EGR3,LONP1,FOSB,ELK1
632	ZNF805	646.7	ARCHS4 Coexpression,902;Enrichr Queries,942;GTEx Coexpression,96	KLF10,BTG2,JUN,ANKRD33B,NFKBIZ,NOL10,TANK,THBS1,HSPA1B
633	SOX18	647	ARCHS4 Coexpression,214;Enrichr Queries,414;GTEx Coexpression,1313	NFKBIA,JAG2,NR4A1,BTG2,EGR2,JUN,CEBPD,IRX3,FOSB,THBS1,ICAM1
634	ZNF212	647	ARCHS4 Coexpression,1247;Enrichr Queries,440;GTEx Coexpression,254	KLF10,BRD2,BTG2,JUN,AMD1,MEPCE,NFKBIA,NR4A1,NUAK2,IRF1,LONP1,IRF6
635	MYF5	647.3	ARCHS4 Coexpression,93;Enrichr Queries,460;GTEx Coexpression,1389	EGR2,JUN,EGR3,IRX3,CXCL1,CXCL3,THBS1,NR4A2,NR4A1,DUSP10,FOSB,ADAM9,CD59
636	SALL3	648	ARCHS4 Coexpression,260;Enrichr Queries,1249;GTEx Coexpression,435	NR4A2,HMGCS1,THBS1,GULP1
637	ZNF75A	648.7	ARCHS4 Coexpression,1079;Enrichr Queries,687;GTEx Coexpression,180	BRD2,NR4A1,NEURL4,JUN,NFKBIZ,ZBED5,THBS1,BIRC3,RELB
638	MEF2C	649	ARCHS4 Coexpression,1375;ENCODE ChIP-seq,24;Enrichr Queries,543;ReMap ChIP-seq,47;GTEx Coexpression,1256	BTG2,JUN,EGR2,ANKRD33B,HMGCS1,THBS1,STX11,ICAM1,NR4A2,NFKBIA,LYL1,NR4A1,DUSP10,NR4A3,FOSB,ZBED5
639	ZKSCAN1	649.4	ARCHS4 Coexpression,870;ENCODE ChIP-seq,94;Enrichr Queries,969;ReMap ChIP-seq,202;GTEx Coexpression,1112	BRD2,JUN,BTG2,SDC4,MEPCE,THBS1,ICAM1,LYL1,TUBA1A,FOSB,NFKBIE,HSPA1B
640	NPAS4	650.3	ARCHS4 Coexpression,999;Enrichr Queries,250;GTEx Coexpression,702	KLF10,BTG2,EGR2,JUN,ANKRD33B,EGR3,THBS1,GEM,NR4A2,NR4A1,NR4A3,FOSB,HSPA1B
641	HOXC13	650.7	ARCHS4 Coexpression,967;Enrichr Queries,361;GTEx Coexpression,624	NR4A2,JAG2,BTG2,EGR2,JUN,EGR3,ELF3,SDC4,IRX3,FOSB,IRF6,THBS1
642	CXXC1	651	ARCHS4 Coexpression,742;Enrichr Queries,1099;GTEx Coexpression,112	NFKBIA,BRD2,JUN,NEURL4,TUBA1A,DPH3
643	ZNF418	652.7	ARCHS4 Coexpression,219;Enrichr Queries,1132;GTEx Coexpression,607	NEURL4,TUBA1A,SKIDA1,FOSB,THBS1,BIRC3
644	ZNF14	654.3	ARCHS4 Coexpression,130;Enrichr Queries,353;GTEx Coexpression,1480	BTG2,JUN,HMGCS1,THBS1,NR4A2,NFKBIA,NEURL4,TUBA1A,IRF1,NFKBIZ,LONP1,FOSB,BIRC3
645	SOX4	654.7	ARCHS4 Coexpression,268;Enrichr Queries,159;GTEx Coexpression,1537	KLF10,BTG2,EGR2,JUN,HMGCS1,CEBPD,SKIDA1,THBS1,ICAM1,NR4A2,NFKBIA,TUBA1A,PLAU,IRF1,LONP1
646	OTX2	655	ARCHS4 Coexpression,141;Enrichr Queries,1118;ReMap ChIP-seq,145;GTEx Coexpression,1216	NANOS1,EGR2,IRX3,SKIDA1,CXCL1,TANK,GEM,PTBP3,GULP1,NR4A2,DUSP10,IRF1,ADAM9,NOL10
647	ZNF563	655.7	ARCHS4 Coexpression,1218;Enrichr Queries,396;GTEx Coexpression,353	IFIH1,NR4A1,BTG2,JUN,NR4A3,CEBPD,NFKBIZ,SMG7-AS1,FOSB,THBS1,GEM
648	HOXD9	655.7	ARCHS4 Coexpression,757;Enrichr Queries,763;GTEx Coexpression,447	NR4A2,EGR2,JUN,NEURL4,EGR3,IRX3,ZBED5,THBS1
649	MTERF2	656	ARCHS4 Coexpression,1288;GTEx Coexpression,24	NEURL4,SKIDA1,UBE2G2,PTBP3
650	GRHL3	656.7	ARCHS4 Coexpression,804;Enrichr Queries,320;GTEx Coexpression,846	BTG2,JUN,DUSP10,ELF3,SDC4,PLAU,TNFAIP2,FOSB,IRF6,THBS1,ICAM1
651	ZNF800	657	ARCHS4 Coexpression,477;Enrichr Queries,1298;GTEx Coexpression,196	NR4A2,BTG2,JUN,NFKBIZ,PTBP3
652	HMGN3	658.5	ARCHS4 Coexpression,1011;ENCODE ChIP-seq,102;ReMap ChIP-seq,46;GTEx Coexpression,1475	KLF10,JUN,CEBPD,SKIDA1,MEPCE,TNFAIP2,CXCL1,GEM,ICAM1,NR4A2,LYL1,NEURL4,DUSP10,DPH3,LONP1,FOSB,NFKBIE,HSPA1B,BIRC3
653	FOXP1	659.2	Literature ChIP-seq,78;ARCHS4 Coexpression,1373;Enrichr Queries,1070;ReMap ChIP-seq,94;GTEx Coexpression,681	BTG2,JUN,VDR,SKIDA1,MEPCE,UBE2G2,THBS1,CXCL2,GEM,PTBP3,NR4A2,NR4A1,MTNR1A,NEURL4,DUSP10,PDIK1L,IRF1,NFKBIZ,FOSB,ADAM9,NFKBIE,FAM71A,BIRC3
654	ZNF117	659.3	ARCHS4 Coexpression,848;Enrichr Queries,748;GTEx Coexpression,382	BTG2,JUN,TUBA1A,NFKBIZ,TNFAIP2,THBS1,BIRC3
655	SP140	659.7	ARCHS4 Coexpression,716;Enrichr Queries,530;GTEx Coexpression,733	IFIH1,NFKBIA,IRF1,TNFRSF9,TNFAIP2,NFKBIE,THBS1,STX11,ICAM1,BIRC3
656	AKAP8	660.7	ARCHS4 Coexpression,56;Enrichr Queries,1223;GTEx Coexpression,703	NR4A2,NFKBIA,BRD2,JUN,NFKBIZ,FOSB,RELB
657	ZNF736	661	ARCHS4 Coexpression,1264;GTEx Coexpression,58	BRD2,DPH3,ZBED5
658	ZNF57	661	ARCHS4 Coexpression,1499;Enrichr Queries,221;GTEx Coexpression,263	KLF10,BTG2,EGR2,JUN,CEBPD,IRX3,GEM,NR4A2,NFKBIA,NR4A1,LONP1,FOSB,IRF6,BIRC3
659	ASCL5	661.5	ARCHS4 Coexpression,429;GTEx Coexpression,894	NEURL4,MEPCE
660	LIN28A	661.5	ARCHS4 Coexpression,783;GTEx Coexpression,540	SMG7-AS1,GULP1
661	SOHLH2	662	ARCHS4 Coexpression,572;Enrichr Queries,1272;GTEx Coexpression,142	NANOS1,SMG7-AS1,FSCN3,THBS1
662	DUXA	662	ARCHS4 Coexpression,715;Enrichr Queries,954;GTEx Coexpression,317	NR4A2,JUN,EGR3,IRF1,AMD1,THBS1,GULP1
663	TBX4	662.7	ARCHS4 Coexpression,1193;Enrichr Queries,766;GTEx Coexpression,29	NFKBIA,NR4A2,EGR2,EGR3,IRF1,IRX3,TNFAIP2,FOSB,THBS1,ICAM1
664	ZBTB22	663	ARCHS4 Coexpression,650;Enrichr Queries,599;GTEx Coexpression,740	NFKBIA,BRD2,BTG2,JUN,NEURL4,TUBA1A,CEBPD,SDC4,LONP1,IRF6
665	HOXA3	664.3	ARCHS4 Coexpression,1174;Enrichr Queries,287;GTEx Coexpression,532	BTG2,EGR2,JUN,CEBPD,IRX3,THBS1,GULP1,ICAM1,NR4A2,PLAU,IRF1,FOSB
666	ZNF428	664.3	ARCHS4 Coexpression,475;Enrichr Queries,1141;GTEx Coexpression,377	NR4A2,BTG2,JUN,TUBA1A
667	FOXL1	665	ARCHS4 Coexpression,66;Enrichr Queries,415;GTEx Coexpression,1514	NR4A2,BTG2,JUN,EGR3,CEBPD,PLAU,VDR,IRX3,FOSB,ADAM9,CD59,THBS1
668	THRA	665.5	Literature ChIP-seq,118;ARCHS4 Coexpression,1603;Enrichr Queries,570;GTEx Coexpression,371	NR4A2,NR4A1,BTG2,EGR2,JUN,TUBA1A,IRF1,THBS1
669	BARX2	665.7	ARCHS4 Coexpression,887;Enrichr Queries,259;GTEx Coexpression,851	BTG2,EGR2,JUN,EGR3,VDR,IRX3,THBS1,NR4A2,NR4A1,NUAK2,ELF3,FOSB,IRF6
670	HOXB2	665.7	ARCHS4 Coexpression,930;Enrichr Queries,302;GTEx Coexpression,765	BTG2,EGR2,JUN,EGR3,CEBPD,IRX3,TNFAIP2,THBS1,GEM,NR4A2,LYL1,PLAU,FOSB
671	ZNF257	666	ARCHS4 Coexpression,623;Enrichr Queries,1208;GTEx Coexpression,167	IFIH1,NEURL4,NR4A3,FOSB,NFKBIE,THBS1
672	NR2F6	666.3	ARCHS4 Coexpression,933;Enrichr Queries,484;ReMap ChIP-seq,150;GTEx Coexpression,1098	BTG2,EGR2,JUN,SDC4,CEBPD,TNFAIP2,ARHGAP5-AS1,THBS1,ICAM1,NFKBIA,NR4A1,ELF3,IRF1,LONP1,FOSB,HSPA1B
673	NKX21	666.5	ARCHS4 Coexpression,143;GTEx Coexpression,1190	TUBA1A,ELF3,SDC4
674	KLF13	668.3	ARCHS4 Coexpression,1316;Enrichr Queries,213;ReMap ChIP-seq,83;GTEx Coexpression,1061	KLF10,BTG2,JUN,CEBPD,SDC4,MEPCE,THBS1,ICAM1,NR4A2,NFKBIA,LYL1,NR4A1,TUBA1A,PDIK1L,IRF1,LONP1,FOSB,NFKBIE,HSPA1B
675	TFEB	669.5	Literature ChIP-seq,74;ARCHS4 Coexpression,1256;Enrichr Queries,211;GTEx Coexpression,1137	KLF10,BTG2,EGR2,JUN,CEBPD,SDC4,TNFAIP2,GEM,ICAM1,RELB,NFKBIA,NR4A1,ELF3,IRF1,LONP1
676	FBXL19	671	ARCHS4 Coexpression,253;GTEx Coexpression,1089	NEURL4,LONP1
677	DUX4	671	ARCHS4 Coexpression,1091;ReMap ChIP-seq,251	NFKBIZ,ADAM9,BIRC3,GULP1
678	ZNF600	671.3	ARCHS4 Coexpression,394;Enrichr Queries,275;GTEx Coexpression,1345	IFIH1,NR4A2,BTG2,JUN,DUSP10,IRF1,TNFRSF9,NFKBIZ,CXCL1,THBS1,ICAM1,BIRC3
679	ZNF846	671.7	ARCHS4 Coexpression,1039;Enrichr Queries,313;GTEx Coexpression,663	KLF10,BTG2,JUN,THBS1,ICAM1,NR4A2,DUSP10,TUBA1A,NFKBIZ,SMG7-AS1,FOSB,BIRC3
680	ZXDB	672	ARCHS4 Coexpression,491;Enrichr Queries,262;GTEx Coexpression,1263	KLF10,BTG2,JUN,CEBPD,THBS1,GEM,PTBP3,NR4A2,NFKBIA,NR4A1,DUSP10,NFKBIZ,LONP1
681	HOXD13	673	Literature ChIP-seq,119;ARCHS4 Coexpression,851;Enrichr Queries,643;GTEx Coexpression,1079	NR4A2,BRD2,EGR2,JUN,BTG2,EGR3,IRX3,FOSB,THBS1
682	ZNF18	673.3	ARCHS4 Coexpression,597;Enrichr Queries,205;GTEx Coexpression,1218	KLF10,BTG2,EGR2,JUN,CEBPD,THBS1,NR4A2,NFKBIA,NR4A1,NEURL4,IRF1,NFKBIZ,LONP1,BIRC3
683	ZNF416	673.3	ARCHS4 Coexpression,663;Enrichr Queries,80;GTEx Coexpression,1277	KLF10,BTG2,EGR2,JUN,CEBPD,AMD1,THBS1,GEM,ICAM1,RELB,IFIH1,NR4A2,NR4A1,DUSP10,IRF1,NFKBIZ,FOSB,BIRC3
684	E2F7	673.6	Literature ChIP-seq,161;ARCHS4 Coexpression,1376;Enrichr Queries,1159;ReMap ChIP-seq,28;GTEx Coexpression,644	JUN,BTG2,ANKRD33B,SDC4,MEPCE,TNFAIP2,THBS1,DUSP10,TUBA1A,NUAK2,PLAU,SMG7-AS1,ADAM9,FOSB,NFKBIE
685	NPAS2	673.7	ARCHS4 Coexpression,1026;Enrichr Queries,179;GTEx Coexpression,816	KLF10,BTG2,EGR2,JUN,EGR3,CEBPD,SDC4,IRX3,THBS1,ICAM1,NR4A2,NR4A1,NR4A3,PLAU,IRF6
686	ZIC3	674.5	Literature ChIP-seq,136;ARCHS4 Coexpression,344;Enrichr Queries,1155;GTEx Coexpression,1063	EGR2,HMGCS1,IRX3,IRF1,THBS1,GULP1
687	ZNF512	675	ARCHS4 Coexpression,265;Enrichr Queries,1166;GTEx Coexpression,594	IFIH1,TUBA1A,HMGCS1,ZBED5,THBS1
688	HIF3A	677	ARCHS4 Coexpression,408;Enrichr Queries,299;GTEx Coexpression,1324	NFKBIA,NR4A1,BTG2,EGR2,JUN,CEBPD,SDC4,PLAU,FOSB,CXCL2,THBS1,ICAM1
689	TBPL1	677.5	ARCHS4 Coexpression,961;GTEx Coexpression,394	NEURL4,SMG7-AS1
690	PBX2	677.8	ARCHS4 Coexpression,879;Enrichr Queries,513;ReMap ChIP-seq,58;GTEx Coexpression,1261	BRD2,BTG2,JUN,ANKRD33B,TNFAIP2,THBS1,ICAM1,NFKBIA,LYL1,NR4A1,NEURL4,TUBA1A,PLAU,PDIK1L,IRF1,LONP1,FOSB,NFKBIE,HSPA1B
691	EBF1	677.8	ARCHS4 Coexpression,790;ENCODE ChIP-seq,80;Enrichr Queries,913;ReMap ChIP-seq,22;GTEx Coexpression,1584	BTG2,ANKRD33B,SDC4,MEPCE,TNFAIP2,THBS1,TANK,ICAM1,LYL1,DUSP10,TUBA1A,NFKBIZ,ZBED5,KLF10,EGR2,JUN,EGR3,HMGCS1,GEM,NR4A2,NFKBIA,NR4A1,IRF1,FOSB,NFKBIE,BIRC3
692	ZNF43	678	ARCHS4 Coexpression,483;Enrichr Queries,1018;GTEx Coexpression,533	BRD2,NR4A1,JUN,HMGCS1,SKIDA1,THBS1
693	GATAD2A	678.3	ARCHS4 Coexpression,145;Enrichr Queries,1289;GTEx Coexpression,601	BRD2,JUN,NEURL4,MEPCE,LONP1,PTBP3
694	ARX	679	ARCHS4 Coexpression,941;Enrichr Queries,681;GTEx Coexpression,415	NR4A2,BTG2,EGR2,JUN,EGR3,TUBA1A,FOSB,ELK1,THBS1
695	NHLH1	681	ARCHS4 Coexpression,793;Enrichr Queries,371;GTEx Coexpression,879	NR4A2,NR4A1,BTG2,EGR2,JUN,EGR3,NR4A3,TUBA1A,ELF3,FOSB,THBS1
696	GLIS2	682	ARCHS4 Coexpression,1575;Enrichr Queries,310;GTEx Coexpression,161	BTG2,EGR2,JUN,TNFAIP2,THBS1,GEM,GULP1,ICAM1,NR4A1,TUBA1A,PLAU,IRF1
697	MYOG	682.5	ARCHS4 Coexpression,1249;ENCODE ChIP-seq,17;Enrichr Queries,397;GTEx Coexpression,1067	KLF10,BTG2,EGR2,JUN,CEBPD,SDC4,CXCL1,UBE2G2,THBS1,NR4A2,NR4A1,NR4A3,ELF3,FOSB
698	HMG20B	682.7	ARCHS4 Coexpression,367;Enrichr Queries,727;GTEx Coexpression,954	NFKBIA,BTG2,JUN,HMGCS1,CEBPD,IRF1,MEPCE,LONP1,ICAM1
699	IRF3	683.2	ARCHS4 Coexpression,692;ENCODE ChIP-seq,49;Enrichr Queries,837;ReMap ChIP-seq,274;GTEx Coexpression,1564	KLF10,JUN,HMGCS1,CEBPD,AMD1,ELK1,ICAM1,RELB,NFKBIA,NR4A2,DUSP10,NUAK2,IRF1,DPH3,SMG7-AS1,ZBED5
700	CREBZF	683.3	ARCHS4 Coexpression,352;Enrichr Queries,987;GTEx Coexpression,711	KLF10,BRD2,BTG2,JUN,NEURL4,LONP1,ZBED5,THBS1
701	ZBTB7C	683.7	ARCHS4 Coexpression,399;Enrichr Queries,930;GTEx Coexpression,722	NR4A2,NR4A1,EGR2,EGR3,ELF3,IRF6,THBS1
702	FOXJ2	684.3	ARCHS4 Coexpression,1452;Enrichr Queries,344;ReMap ChIP-seq,141;GTEx Coexpression,800	KLF10,BRD2,BTG2,JUN,SDC4,UBE2G2,CXCL3,CXCL2,THBS1,NR4A2,NFKBIA,NR4A1,TUBA1A,PDIK1L,IRF1,SMG7-AS1,FOSB,ZBED5
703	HMGA2	684.3	ARCHS4 Coexpression,684;Enrichr Queries,951;GTEx Coexpression,418	JUN,CEBPD,PLAU,ADAM9,THBS1,ICAM1,GULP1
704	HSFY1	685	ARCHS4 Coexpression,807;GTEx Coexpression,563	PDIK1L,FAM71A
705	BAZ2A	685	ARCHS4 Coexpression,335;Enrichr Queries,1225;GTEx Coexpression,495	BRD2,BTG2,JUN,NEURL4
706	ZBTB26	685.3	ARCHS4 Coexpression,300;Enrichr Queries,1371;GTEx Coexpression,385	BTG2,ZBED5,PTBP3
707	HOXC9	686	Literature ChIP-seq,133;ARCHS4 Coexpression,805;Enrichr Queries,675;GTEx Coexpression,1131	NR4A2,NFKBIA,LYL1,EGR2,JUN,NUAK2,PLAU,VDR,IRX3,DPH3,LONP1,THBS1
708	ZFP1	687	ARCHS4 Coexpression,69;Enrichr Queries,706;GTEx Coexpression,1286	KLF10,NFKBIA,NR4A1,BTG2,JUN,DUSP10,TUBA1A,PDIK1L,THBS1,CXCL2,BIRC3
709	ZGLP1	687.5	ARCHS4 Coexpression,545;GTEx Coexpression,830	NEURL4,MEPCE
710	FOXJ1	688	ARCHS4 Coexpression,907;Enrichr Queries,157;GTEx Coexpression,1000	BTG2,EGR2,JUN,EGR3,CEBPD,SDC4,IRX3,TNFAIP2,THBS1,GEM,ICAM1,NR4A1,ELF3,FOSB
711	POU1F1	688.7	ARCHS4 Coexpression,228;Enrichr Queries,472;GTEx Coexpression,1366	NR4A2,NFKBIA,NR4A1,EGR2,JUN,CEBPD,VDR,IRF1,IRX3,FOSB,THBS1
712	NKX23	689	ARCHS4 Coexpression,517;GTEx Coexpression,861	LYL1
713	ZNF587B	690	ARCHS4 Coexpression,502;GTEx Coexpression,878	AMD1
714	ZNF747	690.3	ARCHS4 Coexpression,676;Enrichr Queries,894;GTEx Coexpression,501	PLAU,VDR,IRF1,DPH3,ADAM9,CXCL1,ICAM1
715	PRR12	691	ARCHS4 Coexpression,641;Enrichr Queries,1363;GTEx Coexpression,69	JAG2,NEURL4,JUN,DPH3
716	MBD1	692.3	ARCHS4 Coexpression,621;Enrichr Queries,831;GTEx Coexpression,625	BRD2,BTG2,JUN,NEURL4,SDC4,LONP1,SMG7-AS1,THBS1
717	PRDM2	693	ARCHS4 Coexpression,353;Enrichr Queries,1087;GTEx Coexpression,639	NR4A2,BRD2,NEURL4,BTG2,JUN,NFKBIZ
718	SKOR2	693.5	ARCHS4 Coexpression,317;GTEx Coexpression,1070	BRD2,NEURL4
719	MXI1	693.6	ARCHS4 Coexpression,1478;ENCODE ChIP-seq,98;Enrichr Queries,238;ReMap ChIP-seq,175;GTEx Coexpression,1479	KLF10,BRD2,BTG2,JUN,CEBPD,SDC4,SKIDA1,MEPCE,THBS1,ELK1,ICAM1,NR4A2,NFKBIA,NR4A1,NEURL4,TUBA1A,IRF1,LONP1,FOSB,NOL10,IRF6,NFKBIE,HSPA1B
720	HINFP	694.3	ARCHS4 Coexpression,1483;ReMap ChIP-seq,63;GTEx Coexpression,537	NR4A2,LYL1,BRD2,NEURL4,DUSP10,CEBPD,PDIK1L,TNFAIP2,UBE2G2,CXCL2,HSPA1B
721	ZNF625	695	ARCHS4 Coexpression,270;Enrichr Queries,1337;GTEx Coexpression,478	NEURL4,ANKRD33B,SKIDA1,THBS1
722	MEIS1	695	Literature ChIP-seq,57;ARCHS4 Coexpression,1437;Enrichr Queries,1021;ReMap ChIP-seq,244;GTEx Coexpression,716	JAG2,BTG2,JUN,ANKRD33B,CEBPD,TNFRSF9,UBE2G2,CXCL2,THBS1,NR4A2,LYL1,DUSP10,PDIK1L,IRF1,NFKBIZ,TRIM15,NFKBIE
723	ZNF112	695.5	ARCHS4 Coexpression,550;GTEx Coexpression,841	TUBA1A,STX11
724	ZNF696	695.7	ARCHS4 Coexpression,985;Enrichr Queries,638;GTEx Coexpression,464	KLF10,NR4A2,BTG2,JUN,TUBA1A,CEBPD,PDIK1L,IRF1,FOSB,THBS1
725	POU4F2	695.8	ARCHS4 Coexpression,334;Enrichr Queries,1012;ReMap ChIP-seq,264;GTEx Coexpression,1173	NR4A2,EGR2,JUN,TUBA1A,NUAK2,HMGCS1,IRX3,NFKBIZ,FOSB
726	ZNF770	696.3	ARCHS4 Coexpression,272;Enrichr Queries,1025;GTEx Coexpression,792	JUN,HMGCS1,AMD1,NOL10,PTBP3,GULP1
727	ZBTB6	696.3	ARCHS4 Coexpression,817;Enrichr Queries,689;GTEx Coexpression,583	KLF10,NR4A2,NR4A1,BTG2,JUN,FOSB,TANK,PTBP3
728	ZBTB7A	697.8	ARCHS4 Coexpression,1520;ENCODE ChIP-seq,54;Enrichr Queries,506;ReMap ChIP-seq,243;GTEx Coexpression,1166	JAG2,KLF10,BRD2,BTG2,JUN,CEBPD,SDC4,VDR,TNFAIP2,CXCL1,CXCL3,THBS1,GEM,STX11,ICAM1,NFKBIA,LYL1,NR4A1,PLAU,IRF1,FOSB,SMG7-AS1,CD59
729	ZEB1	698	ARCHS4 Coexpression,938;ENCODE ChIP-seq,63;Enrichr Queries,812;ReMap ChIP-seq,71;GTEx Coexpression,1606	BTG2,EGR2,JUN,SKIDA1,TNFAIP2,THBS1,GEM,ICAM1,NFKBIA,IFIH1,NEURL4,TUBA1A,ELF3,PLAU,IRF1,FOSB,TRIM15,NFKBIE
730	PROX1	698	ARCHS4 Coexpression,774;Enrichr Queries,797;ReMap ChIP-seq,189;GTEx Coexpression,1032	NR4A2,JUN,BTG2,EGR2,NUAK2,NR4A3,ELF3,SDC4,IRF1,THBS1,BIRC3,PTBP3
731	RLF	699	ARCHS4 Coexpression,448;Enrichr Queries,867;GTEx Coexpression,782	KLF10,NFKBIA,BTG2,JUN,DUSP10,LONP1,THBS1,PTBP3
732	ZNF618	699	ARCHS4 Coexpression,797;Enrichr Queries,914;GTEx Coexpression,386	IFIH1,NR4A2,BTG2,JUN,TUBA1A,THBS1,GULP1
733	HEYL	699.3	ARCHS4 Coexpression,1155;Enrichr Queries,509;GTEx Coexpression,434	NR4A1,BTG2,EGR2,JUN,SDC4,PLAU,FOSB,THBS1,GEM,GULP1
734	PRDM16	702	Literature ChIP-seq,157;ARCHS4 Coexpression,1002;Enrichr Queries,1247;GTEx Coexpression,402	NR4A2,THBS1,GULP1,PTBP3
735	FAM170A	702	ARCHS4 Coexpression,320;Enrichr Queries,1399;GTEx Coexpression,387	NFKBIA,SMG7-AS1,FOSB
736	ALX1	702.7	ARCHS4 Coexpression,1067;Enrichr Queries,548;GTEx Coexpression,493	NR4A2,BTG2,EGR2,JUN,EGR3,NR4A3,IRX3,ADAM9,THBS1
737	HES2	702.7	ARCHS4 Coexpression,1015;Enrichr Queries,327;GTEx Coexpression,766	NR4A1,BTG2,EGR2,JUN,ELF3,CEBPD,SDC4,PLAU,FOSB,IRF6,THBS1
738	IRX3	703	ARCHS4 Coexpression,912;Enrichr Queries,413;GTEx Coexpression,784	NR4A2,NFKBIA,JAG2,BTG2,EGR2,JUN,TUBA1A,EGR3,CEBPD,FOSB,IRF6,THBS1
739	LHX3	704.3	ARCHS4 Coexpression,890;Enrichr Queries,751;GTEx Coexpression,472	JAG2,NR4A2,EGR2,EGR3,VDR,IRF1,ICAM1
740	PAX3	705	ARCHS4 Coexpression,153;Enrichr Queries,805;GTEx Coexpression,1157	NR4A2,EGR2,JUN,NR4A3,TUBA1A,HMGCS1,IRX3,SKIDA1,THBS1
741	PCGF2	706	ARCHS4 Coexpression,1131;ReMap ChIP-seq,281	NR4A2,PDIK1L,FAM71A
742	MTF2	706.3	Literature ChIP-seq,51;ARCHS4 Coexpression,1542;GTEx Coexpression,526	EGR2,JUN,EGR3,CEBPD,VDR,IRX3,TNFAIP2,CXCL1,PTBP3,IFIH1,NR4A2,LYL1,NR4A3,NFKBIE,HSPA1B
743	PKNOX1	706.8	ARCHS4 Coexpression,1277;Enrichr Queries,612;ReMap ChIP-seq,109;GTEx Coexpression,829	KLF10,BTG2,JUN,SDC4,MEPCE,ELK1,THBS1,ICAM1,NR4A2,NR4A1,PDIK1L,IRF1,LONP1,FOSB,HSPA1B
744	POU2F1	706.8	ARCHS4 Coexpression,426;Enrichr Queries,1216;ReMap ChIP-seq,226;GTEx Coexpression,959	JAG2,NR4A2,BTG2,JUN,ELF3,AMD1,MEPCE,SMG7-AS1,CD59,ARHGAP5-AS1,GULP1
745	ZNF302	707.7	ARCHS4 Coexpression,1203;Enrichr Queries,679;GTEx Coexpression,241	NFKBIA,NEURL4,BTG2,JUN,HMGCS1,THBS1,ZBED5,PTBP3,BIRC3
746	GCM2	708.3	ARCHS4 Coexpression,781;Enrichr Queries,885;GTEx Coexpression,459	NR4A2,EGR2,JUN,EGR3,TUBA1A,VDR
747	ZNF304	709	ARCHS4 Coexpression,966;Enrichr Queries,230;GTEx Coexpression,931	KLF10,BTG2,JUN,HMGCS1,AMD1,THBS1,GEM,NR4A2,NR4A1,LONP1,FOSB,ZBED5,BIRC3
748	RBPJL	710	ARCHS4 Coexpression,739;Enrichr Queries,445;GTEx Coexpression,946	NR4A2,NR4A1,EGR2,JUN,EGR3,SDC4,ARL14,VDR,FOSB,THBS1
749	STAT5B	710.3	ARCHS4 Coexpression,1471;Enrichr Queries,526;ReMap ChIP-seq,59;GTEx Coexpression,785	BTG2,EGR2,JUN,VDR,TNFRSF9,MEPCE,THBS1,STX11,ICAM1,NR4A2,NFKBIA,NEURL4,DUSP10,PLAU,IRF1,NFKBIZ,DPH3,LONP1
750	BCL11B	711.8	Literature ChIP-seq,162;ARCHS4 Coexpression,1428;Enrichr Queries,585;GTEx Coexpression,672	NR4A2,BTG2,EGR2,JUN,EGR3,NR4A3,IRX3,IRF6,THBS1
751	NCOA2	711.8	ARCHS4 Coexpression,589;Enrichr Queries,1370;ReMap ChIP-seq,118;GTEx Coexpression,770	KLF10,BTG2,JUN,ANKRD33B,NUAK2,ELF3,SDC4,PLAU,VDR,TNFAIP2,PTBP3
752	ZBTB11	713	ARCHS4 Coexpression,702;Enrichr Queries,1215;ReMap ChIP-seq,215;GTEx Coexpression,720	NR4A2,KLF10,LYL1,BRD2,JUN,PDIK1L,MEPCE,FOSB,HSPA1B,ICAM1,PTBP3
753	ZBTB16	713.3	ARCHS4 Coexpression,1122;Enrichr Queries,180;ReMap ChIP-seq,250;GTEx Coexpression,1301	KLF10,BTG2,EGR2,JUN,EGR3,HMGCS1,CEBPD,SDC4,THBS1,NR4A2,NFKBIA,NR4A1,NR4A3,SMG7-AS1,FOSB,IRF6
754	CREB3L4	713.7	ARCHS4 Coexpression,865;Enrichr Queries,956;GTEx Coexpression,320	NR4A1,BTG2,JUN,ELF3,IRX3,AMD1,THBS1
755	PROP1	713.7	ARCHS4 Coexpression,569;Enrichr Queries,274;GTEx Coexpression,1298	NR4A2,NR4A1,BTG2,EGR2,JUN,EGR3,NR4A3,CEBPD,IRF1,DPH3,FOSB,IRF6
756	ZNF574	713.7	ARCHS4 Coexpression,904;Enrichr Queries,932;GTEx Coexpression,305	JUN,SDC4,MEPCE,LONP1,SMG7-AS1,FOSB,GEM
757	GTF2IRD2	714	ARCHS4 Coexpression,1335;Enrichr Queries,630;GTEx Coexpression,177	BRD2,NR4A1,BTG2,JUN,VDR,NFKBIZ,UBE2G2,ZBED5,THBS1,ICAM1
758	NFE2L1	714	ARCHS4 Coexpression,752;Enrichr Queries,483;ReMap ChIP-seq,249;GTEx Coexpression,1372	KLF10,BRD2,BTG2,JUN,SDC4,TNFAIP2,THBS1,NFKBIA,NEURL4,TUBA1A,IRF1,SMG7-AS1,HSPA1B
759	LEUTX	714.7	ARCHS4 Coexpression,733;Enrichr Queries,1338;GTEx Coexpression,73	IFIH1,ANKRD33B,AMD1,FOSB,NFKBIE
760	NR2C2	714.8	ARCHS4 Coexpression,829;ENCODE ChIP-seq,106;Enrichr Queries,1360;ReMap ChIP-seq,245;GTEx Coexpression,1034	BRD2,NEURL4,JUN,SKIDA1,UBE2G2,ICAM1
761	TFAP4	715.3	ARCHS4 Coexpression,1364;Enrichr Queries,627;ReMap ChIP-seq,166;GTEx Coexpression,704	KLF10,BTG2,EGR2,JUN,SDC4,MEPCE,TNFAIP2,THBS1,ICAM1,NR4A1,ELF3,PDIK1L,LONP1,FOSB,NFKBIE
762	PLAG1	715.3	ARCHS4 Coexpression,732;Enrichr Queries,226;GTEx Coexpression,1188	KLF10,BTG2,EGR2,JUN,EGR3,SKIDA1,THBS1,GEM,NR4A2,NR4A3,LONP1,FOSB,BIRC3
763	PPARG	716.6	Literature ChIP-seq,15;ARCHS4 Coexpression,1564;Enrichr Queries,322;ReMap ChIP-seq,89;GTEx Coexpression,1593	KLF10,BRD2,JUN,EGR2,ARL14,SDC4,CEBPD,VDR,AMD1,UBE2G2,CXCL2,THBS1,TANK,GEM,ICAM1,PTBP3,NFKBIA,IFIH1,NR4A1,ELF3,PLAU,IRF1,NFKBIZ,FAM71A
764	HOXA7	717	ARCHS4 Coexpression,601;Enrichr Queries,373;GTEx Coexpression,1177	NR4A2,LYL1,EGR2,JUN,EGR3,PLAU,IRF1,IRX3,FOSB,CXCL2,THBS1
765	ZNF91	717.7	ARCHS4 Coexpression,659;Enrichr Queries,667;GTEx Coexpression,827	NFKBIA,NEURL4,BTG2,JUN,TUBA1A,HMGCS1,CEBPD,THBS1
766	ZNF626	717.7	ARCHS4 Coexpression,806;Enrichr Queries,902;GTEx Coexpression,445	NR4A2,JUN,NEURL4,SKIDA1,NFKBIZ,THBS1,BIRC3
767	SP7	718.3	ARCHS4 Coexpression,539;Enrichr Queries,300;GTEx Coexpression,1316	NR4A2,JAG2,NR4A1,BTG2,EGR2,JUN,EGR3,CEBPD,VDR,FOSB,THBS1,GEM
768	NRL	720	ARCHS4 Coexpression,580;Enrichr Queries,220;GTEx Coexpression,1360	BTG2,EGR2,JUN,EGR3,ANKRD33B,CEBPD,VDR,THBS1,NR4A2,NR4A1,NR4A3,IRF1,FOSB
769	TRERF1	722.3	ARCHS4 Coexpression,1100;Enrichr Queries,855;GTEx Coexpression,212	BTG2,JUN,NUAK2,DUSP10,PLAU,LONP1,THBS1,PTBP3
770	ZBTB24	723.7	ARCHS4 Coexpression,1507;Enrichr Queries,479;GTEx Coexpression,185	KLF10,NR4A2,NFKBIA,BTG2,EGR2,JUN,ANKRD33B,IRF1,AMD1,TANK,THBS1
771	ZBTB45	724	ARCHS4 Coexpression,175;Enrichr Queries,714;GTEx Coexpression,1283	KLF10,NFKBIA,BRD2,JUN,NEURL4,LONP1,THBS1,ELK1,RELB
772	TBX6	724	ARCHS4 Coexpression,1192;Enrichr Queries,137;GTEx Coexpression,843	BTG2,EGR2,JUN,EGR3,VDR,TNFAIP2,THBS1,GEM,NR4A2,NFKBIA,NR4A1,NUAK2,NR4A3,IRF1,LONP1,FOSB
773	ZNF443	724.3	ARCHS4 Coexpression,468;Enrichr Queries,474;GTEx Coexpression,1231	IFIH1,KLF10,NR4A1,BTG2,EGR2,JUN,TUBA1A,CEBPD,THBS1,BIRC3
774	LTF	726	ARCHS4 Coexpression,184;GTEx Coexpression,1268	NFKBIZ,FOSB,STX11
775	GSC	726	ARCHS4 Coexpression,768;Enrichr Queries,883;GTEx Coexpression,527	NR4A2,JUN,EGR2,EGR3,IRX3,IRF6,THBS1
776	TET1	726.3	Literature ChIP-seq,16;ARCHS4 Coexpression,707;GTEx Coexpression,1456	KLF10,JAG2,JUN,EGR3,SDC4,IRX3,AMD1,STX11,GULP1,ICAM1,TUBA1A,NR4A3,PDIK1L,IRF1,FOSB
777	ZNF160	726.7	ARCHS4 Coexpression,803;Enrichr Queries,789;GTEx Coexpression,588	NFKBIA,JUN,TUBA1A,HMGCS1,CEBPD,ZBED5,THBS1,BIRC3
778	PIN1	727	ARCHS4 Coexpression,801;GTEx Coexpression,653	NR4A2,PTBP3
779	ZNF610	727	ARCHS4 Coexpression,308;Enrichr Queries,868;GTEx Coexpression,1005	NR4A2,BTG2,JUN,NEURL4,DUSP10,TUBA1A,THBS1,GEM
780	NPAS3	728.3	ARCHS4 Coexpression,416;Enrichr Queries,1346;GTEx Coexpression,423	NR4A2,TUBA1A,HMGCS1
781	ELF4	729	ARCHS4 Coexpression,1206;Enrichr Queries,162;GTEx Coexpression,819	BTG2,JUN,CEBPD,SDC4,TNFAIP2,THBS1,STX11,ICAM1,IFIH1,NFKBIA,PLAU,IRF1,NFKBIZ,LONP1,BIRC3
782	NKX24	729	ARCHS4 Coexpression,179;GTEx Coexpression,1279	NFKBIA,BRD2,FOSB
783	ZNF83	729.5	ARCHS4 Coexpression,1500;Enrichr Queries,657;ReMap ChIP-seq,180;GTEx Coexpression,581	BRD2,BTG2,JUN,CEBPD,ARHGAP5-AS1,CXCL3,CXCL2,THBS1,PTBP3,TUBA1A,PDIK1L,NFKBIZ,ADAM9,ZBED5,BIRC3
784	ZSCAN18	731.7	ARCHS4 Coexpression,543;Enrichr Queries,859;GTEx Coexpression,793	NR4A2,BTG2,JUN,TUBA1A,FOSB,NOL10,THBS1
785	PRDM9	731.7	ARCHS4 Coexpression,303;Enrichr Queries,523;GTEx Coexpression,1369	IFIH1,NR4A2,NR4A1,BRD2,BTG2,EGR2,JUN,NEURL4,DUSP10,NR4A3,FOSB
786	ZNF404	732.3	ARCHS4 Coexpression,631;Enrichr Queries,360;GTEx Coexpression,1206	NR4A2,EGR2,JUN,NR4A3,TUBA1A,CEBPD,NFKBIZ,FOSB,THBS1,GEM,BIRC3
787	ZNF689	734	ARCHS4 Coexpression,1154;Enrichr Queries,519;GTEx Coexpression,529	BRD2,EGR2,JUN,PLAU,VDR,IRF1,SMG7-AS1,CXCL2,THBS1,ICAM1
788	ZNF346	734	ARCHS4 Coexpression,679;Enrichr Queries,974;GTEx Coexpression,549	LYL1,BRD2,BTG2,JUN,TUBA1A,IRF1,THBS1
789	ZNF790	735.7	ARCHS4 Coexpression,1018;Enrichr Queries,270;GTEx Coexpression,919	BTG2,EGR2,JUN,AMD1,THBS1,GEM,ICAM1,IFIH1,NR4A2,NR4A1,NEURL4,NR4A3,FOSB
790	ZNF467	736.3	ARCHS4 Coexpression,1149;Enrichr Queries,234;GTEx Coexpression,826	BTG2,EGR2,JUN,CEBPD,TNFAIP2,THBS1,STX11,ICAM1,NR4A2,NFKBIA,NR4A1,IRF1,NFKBIZ
791	FOXP4	736.3	ARCHS4 Coexpression,1473;Enrichr Queries,598;GTEx Coexpression,138	NR4A2,BRD2,NR4A1,BTG2,JUN,SDC4,IRF1,LONP1,THBS1,GULP1
792	PRDM14	736.4	Literature ChIP-seq,29;ARCHS4 Coexpression,700;Enrichr Queries,1241;ReMap ChIP-seq,289;GTEx Coexpression,1423	KLF10,BRD2,BTG2,JUN,SDC4,IRX3,TNFAIP2,UBE2G2,THBS1,ELK1,STX11,GULP1,NR4A1,MTNR1A,ELF3
793	GLIS3	739	ARCHS4 Coexpression,71;Enrichr Queries,686;GTEx Coexpression,1460	NR4A2,EGR2,JUN,ELF3,SDC4,PLAU,ADAM9,CD59,THBS1,GEM,ICAM1
794	NFIA	741.7	ARCHS4 Coexpression,718;Enrichr Queries,929;GTEx Coexpression,578	NR4A2,BTG2,JUN,TUBA1A,CEBPD,THBS1,PTBP3
795	ZBTB20	742.7	ARCHS4 Coexpression,1435;Enrichr Queries,678;GTEx Coexpression,115	NR4A2,NFKBIA,NR4A1,BTG2,JUN,CEBPD,SMG7-AS1,FSCN3,THBS1
796	ZNF142	743.3	ARCHS4 Coexpression,298;Enrichr Queries,1082;GTEx Coexpression,850	BRD2,NEURL4,JUN,MEPCE,THBS1
797	RREB1	744	ARCHS4 Coexpression,862;Enrichr Queries,1077;GTEx Coexpression,293	NR4A1,BTG2,JUN,TUBA1A,IRF6,THBS1,PTBP3
798	MBNL2	745.3	ARCHS4 Coexpression,1163;Enrichr Queries,682;GTEx Coexpression,391	NFKBIA,BTG2,JUN,TUBA1A,HMGCS1,SDC4,THBS1,PTBP3
799	ZBED5	746.5	ARCHS4 Coexpression,349;GTEx Coexpression,1144	TUBA1A,LONP1
800	ZFAT	746.7	ARCHS4 Coexpression,872;Enrichr Queries,1301;GTEx Coexpression,67	IFIH1,KLF10,ANKRD33B,DUSP10,NFKBIE
801	TBX5	746.8	Literature ChIP-seq,127;ARCHS4 Coexpression,507;Enrichr Queries,948;GTEx Coexpression,1405	NR4A2,BRD2,EGR2,JUN,BTG2,EGR3,IRX3,DPH3,ADAM9,CXCL1,THBS1,ICAM1
802	DLX1	747	ARCHS4 Coexpression,276;Enrichr Queries,473;GTEx Coexpression,1492	NR4A2,NR4A1,EGR2,JUN,EGR3,TUBA1A,CEBPD,PDIK1L,IRX3,FOSB,THBS1
803	ZNF764	747	ARCHS4 Coexpression,809;Enrichr Queries,476;GTEx Coexpression,956	IFIH1,EGR2,JUN,PLAU,VDR,IRF1,TNFRSF9,ADAM9,CXCL2,ICAM1
804	SATB1	747.5	ARCHS4 Coexpression,839;Enrichr Queries,622;ReMap ChIP-seq,290;GTEx Coexpression,1239	NR4A2,NFKBIA,BTG2,EGR2,JUN,CEBPD,IRF1,ADAM9,CXCL3,THBS1
805	HMG20A	748.3	ARCHS4 Coexpression,431;Enrichr Queries,949;GTEx Coexpression,865	KLF10,NFKBIA,BTG2,JUN,TUBA1A,VDR,THBS1
806	VSX2	748.3	ARCHS4 Coexpression,833;Enrichr Queries,1004;GTEx Coexpression,408	NR4A2,EGR2,TUBA1A,EGR3,ANKRD33B,IRX3
807	ZIC1	749.7	ARCHS4 Coexpression,490;Enrichr Queries,663;GTEx Coexpression,1096	NR4A2,NR4A1,EGR2,JUN,EGR3,TUBA1A,IRX3,THBS1
808	SMAD9	750	ARCHS4 Coexpression,285;Enrichr Queries,897;GTEx Coexpression,1068	NR4A1,BTG2,EGR2,JUN,TUBA1A,SKIDA1,THBS1
809	PRDM5	750.3	Literature ChIP-seq,137;ARCHS4 Coexpression,1573;Enrichr Queries,1125;GTEx Coexpression,166	BRD2,JUN,MEPCE,ZBED5,THBS1,ELK1,GULP1
810	ZBED1	750.3	ARCHS4 Coexpression,755;Enrichr Queries,640;ReMap ChIP-seq,45;GTEx Coexpression,1561	BRD2,BTG2,JUN,CEBPD,MEPCE,THBS1,ICAM1,NFKBIA,LYL1,NEURL4,TUBA1A,IRF1,LONP1,SMG7-AS1,FOSB,NFKBIE,HSPA1B
811	ZBTB17	751.3	ARCHS4 Coexpression,106;Enrichr Queries,639;GTEx Coexpression,1509	KLF10,NR4A2,NFKBIA,BRD2,NR4A1,BTG2,JUN,NEURL4,IRF1,NFKBIE,ICAM1,RELB
812	ZNF827	752	ARCHS4 Coexpression,1033;Enrichr Queries,1042;GTEx Coexpression,181	NEURL4,BTG2,JUN,TUBA1A,CEBPD,AMD1,THBS1
813	ZFP92	753	ARCHS4 Coexpression,1344;Enrichr Queries,728;GTEx Coexpression,187	NR4A2,EGR2,EGR3,ELF3,VDR,FOSB,IRF6,ELK1,THBS1
814	ZNF652	753.3	Literature ChIP-seq,107;ARCHS4 Coexpression,1176;Enrichr Queries,712;GTEx Coexpression,1018	KLF10,NFKBIA,BTG2,JUN,DUSP10,HMGCS1,THBS1,BIRC3
815	NFIC	754.2	ARCHS4 Coexpression,1514;ENCODE ChIP-seq,4;Enrichr Queries,919;ReMap ChIP-seq,3;GTEx Coexpression,1331	BTG2,ANKRD33B,SDC4,CEBPD,TNFAIP2,TANK,THBS1,ICAM1,DUSP10,NUAK2,PLAU,NFKBIZ,ZBED5,KLF10,BRD2,JUN,SKIDA1,GEM,GULP1,NFKBIA,NR4A1,IRF1,ADAM9,IRF6,NFKBIE,HSPA1B
816	ZNF248	754.3	ARCHS4 Coexpression,775;Enrichr Queries,798;GTEx Coexpression,690	NR4A2,NEURL4,BTG2,JUN,TUBA1A,NFKBIZ,THBS1,ZBED5
817	TIGD1	754.5	ARCHS4 Coexpression,1319;GTEx Coexpression,190	NEURL4,ELK1
818	ZBTB3	754.7	ARCHS4 Coexpression,1171;Enrichr Queries,186;GTEx Coexpression,907	KLF10,BTG2,EGR2,JUN,CEBPD,THBS1,ICAM1,NR4A2,NFKBIA,NR4A1,IRF1,LONP1,FOSB
819	SMYD3	755	ARCHS4 Coexpression,600;GTEx Coexpression,910	NEURL4
820	ZNF24	755	ARCHS4 Coexpression,305;Enrichr Queries,1083;ReMap ChIP-seq,146;GTEx Coexpression,1486	BRD2,BTG2,JUN,MEPCE,AMD1,ICAM1,PTBP3,NR4A2,NFKBIA,LYL1,TUBA1A,FOSB,NFKBIE,HSPA1B
821	NKX32	755.5	ARCHS4 Coexpression,837;GTEx Coexpression,674	JUN,GEM
822	PRDM13	755.7	ARCHS4 Coexpression,1134;Enrichr Queries,1029;GTEx Coexpression,104	IFIH1,NR4A2,EGR2,ANKRD33B,EGR3,IRX3,NFKBIE
823	ZNF707	756.3	ARCHS4 Coexpression,1127;Enrichr Queries,732;GTEx Coexpression,410	KLF10,NR4A1,BTG2,JUN,CEBPD,IRF1,MEPCE,THBS1
824	HOXA11	756.7	ARCHS4 Coexpression,194;Enrichr Queries,500;GTEx Coexpression,1576	NR4A2,JAG2,EGR2,JUN,CEBPD,PLAU,VDR,IRX3,THBS1,ELK1,ICAM1
825	SALL2	756.7	ARCHS4 Coexpression,329;Enrichr Queries,1049;GTEx Coexpression,892	BTG2,JUN,TUBA1A,HMGCS1,THBS1,GULP1
826	NR1I2	757.3	Literature ChIP-seq,70;ARCHS4 Coexpression,1023;Enrichr Queries,833;GTEx Coexpression,1103	NR4A2,NFKBIA,NR4A1,JUN,DUSP10,ELF3,CEBPD,SDC4,VDR,TRIM15,CXCL1,PTBP3
827	ZNF763	757.7	ARCHS4 Coexpression,378;Enrichr Queries,520;GTEx Coexpression,1375	NR4A2,NANOS1,NR4A1,BTG2,JUN,EGR3,TUBA1A,CEBPD,FOSB,THBS1,ICAM1
828	ZNF547	758.3	ARCHS4 Coexpression,656;Enrichr Queries,527;GTEx Coexpression,1092	KLF10,NR4A2,BTG2,JUN,NEURL4,NR4A3,LONP1,FOSB,THBS1,GEM
829	LCOR	758.3	ARCHS4 Coexpression,560;Enrichr Queries,1200;GTEx Coexpression,515	BTG2,JUN,TUBA1A,ELF3,THBS1
830	TSC22D1	758.3	ARCHS4 Coexpression,668;Enrichr Queries,305;GTEx Coexpression,1302	KLF10,NFKBIA,NR4A1,BTG2,JUN,TUBA1A,HMGCS1,CEBPD,SDC4,IRF1,THBS1
831	MLXIP	759	ARCHS4 Coexpression,1327;Enrichr Queries,731;GTEx Coexpression,219	KLF10,NFKBIA,NR4A1,BTG2,JUN,LONP1,UBE2G2,THBS1
832	FOXN4	759.3	ARCHS4 Coexpression,969;Enrichr Queries,828;GTEx Coexpression,481	EGR2,EGR3,TUBA1A,IRX3,LONP1,SMG7-AS1,FOSB,THBS1
833	ZNF337	760	ARCHS4 Coexpression,374;Enrichr Queries,869;GTEx Coexpression,1037	BTG2,JUN,NEURL4,TUBA1A,HMGCS1,CEBPD,THBS1,BIRC3
834	TEAD1	760.5	ARCHS4 Coexpression,557;Enrichr Queries,1050;ReMap ChIP-seq,9;GTEx Coexpression,1426	JUN,BTG2,ANKRD33B,SDC4,SKIDA1,TNFAIP2,CXCL1,CXCL2,THBS1,GULP1,NUAK2,ELF3,PLAU,IRF1,ADAM9,FOSB
835	FOXR1	760.7	ARCHS4 Coexpression,688;Enrichr Queries,539;GTEx Coexpression,1055	EGR2,ANKRD33B,PLAU,TNFRSF9,AMD1,CXCL1,CXCL3,CXCL2,ICAM1
836	TLX3	762.7	ARCHS4 Coexpression,163;Enrichr Queries,884;GTEx Coexpression,1241	NR4A2,JAG2,EGR2,JUN,EGR3,TUBA1A,IRX3
837	ZNF285	763	ARCHS4 Coexpression,554;GTEx Coexpression,972	TUBA1A
838	ZNF575	763.3	ARCHS4 Coexpression,513;Enrichr Queries,292;GTEx Coexpression,1485	NR4A2,NFKBIA,NR4A1,LYL1,BTG2,JUN,CEBPD,PLAU,VDR,IRF1,FOSB,THBS1
839	ZNF485	763.7	ARCHS4 Coexpression,1492;Enrichr Queries,288;GTEx Coexpression,511	KLF10,BTG2,JUN,THBS1,NR4A2,DUSP10,PLAU,IRF1,NFKBIZ,LONP1,NOL10,BIRC3
840	ZSCAN5A	764	ARCHS4 Coexpression,1392;Enrichr Queries,690;GTEx Coexpression,210	KLF10,NR4A2,JUN,EGR3,HMGCS1,SMG7-AS1,FOSB,FSCN3,THBS1
841	PAX1	765	ARCHS4 Coexpression,646;Enrichr Queries,998;GTEx Coexpression,651	NR4A2,JAG2,EGR2,EGR3,VDR,IRX3
842	FOXI3	766.5	ARCHS4 Coexpression,1494;GTEx Coexpression,39	JAG2,VDR,IRX3,IRF6
843	ZNF322	767	ARCHS4 Coexpression,64;GTEx Coexpression,1470	TUBA1A,HMGCS1,RELB,GULP1
844	ESRRB	767.3	Literature ChIP-seq,97;ARCHS4 Coexpression,1231;Enrichr Queries,778;GTEx Coexpression,963	NR4A2,NR4A1,BRD2,EGR2,JUN,NUAK2,NR4A3,ELF3,PLAU,THBS1,BIRC3
845	ZNF558	767.3	ARCHS4 Coexpression,1463;Enrichr Queries,584;GTEx Coexpression,255	BTG2,JUN,DUSP10,HMGCS1,CEBPD,UBE2G2,ZBED5,THBS1,ICAM1,BIRC3
846	ZNF841	768.3	ARCHS4 Coexpression,1329;Enrichr Queries,392;GTEx Coexpression,584	NR4A2,BTG2,JUN,HMGCS1,SDC4,NFKBIZ,ZBED5,THBS1,ICAM1,BIRC3,RELB
847	CAMTA2	768.3	ARCHS4 Coexpression,511;Enrichr Queries,1108;GTEx Coexpression,686	BRD2,NR4A1,NEURL4,BTG2,JUN
848	ASCL1	769	ARCHS4 Coexpression,895;Enrichr Queries,755;ReMap ChIP-seq,92;GTEx Coexpression,1334	JAG2,BTG2,JUN,EGR2,EGR3,TNFAIP2,THBS1,NR4A2,NR4A1,TUBA1A,NUAK2,ELF3,NFKBIE,FAM71A
849	ZNF292	769.7	ARCHS4 Coexpression,921;Enrichr Queries,1358;GTEx Coexpression,30	IFIH1,JUN,ANKRD33B,TUBA1A,NFKBIE,BIRC3
850	LBX2	770	ARCHS4 Coexpression,922;Enrichr Queries,260;GTEx Coexpression,1128	EGR2,JUN,EGR3,CEBPD,VDR,CXCL3,THBS1,ICAM1,NR4A2,LYL1,NR4A1,PLAU,FOSB
851	ZNF672	770	ARCHS4 Coexpression,398;Enrichr Queries,419;GTEx Coexpression,1493	KLF10,NFKBIA,BRD2,LYL1,BTG2,JUN,TUBA1A,HMGCS1,CEBPD,IRF1,MEPCE,ICAM1
852	ZNF502	771.7	ARCHS4 Coexpression,1219;Enrichr Queries,568;GTEx Coexpression,528	NR4A2,BTG2,JUN,EGR3,FOSB,ZBED5,THBS1,GEM,BIRC3
853	ZNF850	772	ARCHS4 Coexpression,1308;GTEx Coexpression,236	IFIH1,ANKRD33B
854	RBAK	772	ARCHS4 Coexpression,462;Enrichr Queries,1186;GTEx Coexpression,668	BTG2,JUN,PDIK1L,THBS1,PTBP3
855	HDX	772.3	ARCHS4 Coexpression,467;Enrichr Queries,331;GTEx Coexpression,1519	IFIH1,NR4A2,JUN,EGR3,NR4A3,TUBA1A,IRF1,FOSB,THBS1,GEM,ICAM1,BIRC3
856	DMRTA1	773	ARCHS4 Coexpression,133;Enrichr Queries,822;GTEx Coexpression,1364	NR4A2,EGR2,JUN,DUSP10,NUAK2,IRX3,SKIDA1,THBS1,GULP1
857	ZSCAN20	773	ARCHS4 Coexpression,1136;Enrichr Queries,991;GTEx Coexpression,192	KLF10,NR4A2,BTG2,JUN,ANKRD33B,DUSP10,ADAM9
858	SP5	773	ARCHS4 Coexpression,737;Enrichr Queries,819;GTEx Coexpression,763	NR4A2,BTG2,EGR2,JUN,IRX3,TRIM15,IRF6,THBS1
859	ZKSCAN3	773	ARCHS4 Coexpression,1550;Enrichr Queries,531;GTEx Coexpression,238	NR4A2,KLF10,NR4A1,BTG2,JUN,TUBA1A,IRF1,NFKBIZ,ZBED5,THBS1
860	EBF2	773	ARCHS4 Coexpression,988;GTEx Coexpression,558	EGR2,TUBA1A
861	TIGD7	773	ARCHS4 Coexpression,487;Enrichr Queries,754;GTEx Coexpression,1078	NFKBIA,JUN,TUBA1A,HMGCS1,NFKBIZ,LONP1,THBS1
862	PHF20	773.3	ARCHS4 Coexpression,492;Enrichr Queries,1229;GTEx Coexpression,599	NFKBIA,BTG2,JUN,NEURL4,DPH3
863	ZNF311	774.7	ARCHS4 Coexpression,212;Enrichr Queries,533;GTEx Coexpression,1579	IFIH1,NR4A2,JUN,NR4A3,TUBA1A,HMGCS1,LONP1,FOSB,THBS1,ICAM1
864	ZNF486	775	ARCHS4 Coexpression,756;Enrichr Queries,536;GTEx Coexpression,1033	NFKBIA,BTG2,JUN,NEURL4,TUBA1A,NFKBIZ,LONP1,THBS1,BIRC3
865	HOXC11	775.8	ARCHS4 Coexpression,971;Enrichr Queries,896;ReMap ChIP-seq,294;GTEx Coexpression,942	NR4A2,JUN,EGR3,IRX3,THBS1
866	ZNF184	776.7	ARCHS4 Coexpression,681;Enrichr Queries,168;GTEx Coexpression,1481	KLF10,BTG2,JUN,EGR3,HMGCS1,THBS1,NR4A2,NR4A1,DUSP10,NR4A3,TUBA1A,IRF1,LONP1,FOSB,BIRC3
867	ZNF446	777	ARCHS4 Coexpression,878;Enrichr Queries,945;GTEx Coexpression,508	KLF10,NEURL4,BTG2,JUN,CEBPD,MEPCE,LONP1
868	ZBTB34	777.7	ARCHS4 Coexpression,407;Enrichr Queries,1198;GTEx Coexpression,728	BTG2,JUN,LONP1,STX11,PTBP3
869	VAX2	777.7	ARCHS4 Coexpression,710;Enrichr Queries,442;GTEx Coexpression,1181	NR4A2,NR4A1,EGR2,JUN,EGR3,NR4A3,IRX3,FOSB,FSCN3,THBS1
870	GZF1	779	ARCHS4 Coexpression,889;Enrichr Queries,113;GTEx Coexpression,1335	KLF10,BRD2,BTG2,EGR2,JUN,EGR3,SDC4,THBS1,NR4A2,NFKBIA,NR4A1,NR4A3,IRF1,NFKBIZ,LONP1,FOSB
871	ZNF32	779.3	ARCHS4 Coexpression,982;Enrichr Queries,906;GTEx Coexpression,450	NFKBIA,JUN,TUBA1A,LONP1,THBS1,PTBP3
872	CRX	780.5	Literature ChIP-seq,55;ARCHS4 Coexpression,1547;Enrichr Queries,449;GTEx Coexpression,1071	EGR2,JUN,ANKRD33B,CEBPD,VDR,THBS1,ELK1,GEM,NR4A2,NR4A1,NEURL4,IRF1,FOSB
873	PKNOX2	781.3	ARCHS4 Coexpression,1217;Enrichr Queries,771;GTEx Coexpression,356	NR4A2,NR4A1,NEURL4,EGR2,JUN,EGR3,THBS1
874	HES7	782	ARCHS4 Coexpression,1082;Enrichr Queries,82;GTEx Coexpression,1182	KLF10,BTG2,EGR2,JUN,EGR3,CEBPD,IRX3,TNFAIP2,THBS1,ICAM1,NR4A2,NR4A1,NR4A3,ELF3,IRF1,LONP1,FOSB
875	ZNF773	783	ARCHS4 Coexpression,1484;Enrichr Queries,628;GTEx Coexpression,237	KLF10,JUN,IRF1,NFKBIZ,FOSB,NOL10,TANK,THBS1,ICAM1,BIRC3
876	LCORL	783	ARCHS4 Coexpression,458;Enrichr Queries,1226;GTEx Coexpression,665	NR4A2,JUN,ANKRD33B,TUBA1A,HMGCS1
877	HNF1A	784.3	ARCHS4 Coexpression,984;Enrichr Queries,394;GTEx Coexpression,975	NR4A2,NR4A1,EGR2,JUN,ELF3,CEBPD,VDR,IRF1,TRIM15,IRF6,ICAM1
878	TEAD3	785	ARCHS4 Coexpression,1300;Enrichr Queries,468;GTEx Coexpression,587	NR4A1,BTG2,EGR2,JUN,CEBPD,SDC4,IRF1,LONP1,THBS1,GEM
879	HOXA4	788	ARCHS4 Coexpression,896;Enrichr Queries,222;GTEx Coexpression,1246	BTG2,EGR2,JUN,EGR3,CEBPD,VDR,IRX3,CXCL3,CXCL2,THBS1,PLAU,FOSB
880	ZIM2	789.3	ARCHS4 Coexpression,932;Enrichr Queries,1384;GTEx Coexpression,52	NR4A2,SMG7-AS1,FSCN3,FAM71A
881	POU3F4	789.3	ARCHS4 Coexpression,165;Enrichr Queries,836;GTEx Coexpression,1367	NR4A2,EGR2,JUN,NR4A3,TUBA1A,HMGCS1,SKIDA1,FOSB,GULP1
882	ZSCAN26	790	ARCHS4 Coexpression,748;GTEx Coexpression,832	TUBA1A,PTBP3
883	ZMAT1	790.3	ARCHS4 Coexpression,1076;Enrichr Queries,722;GTEx Coexpression,573	NR4A2,BTG2,JUN,NFKBIZ,FOSB,ZBED5,THBS1,GEM
884	ZNF521	790.3	ARCHS4 Coexpression,371;Enrichr Queries,1024;GTEx Coexpression,976	EGR2,JUN,TUBA1A,SKIDA1,THBS1,GEM
885	ZNF473	790.7	ARCHS4 Coexpression,1226;Enrichr Queries,655;GTEx Coexpression,491	KLF10,NR4A1,JUN,LONP1,SMG7-AS1,FOSB,THBS1,GEM
886	EBF4	791	ARCHS4 Coexpression,226;Enrichr Queries,800;GTEx Coexpression,1347	NR4A1,EGR2,JUN,NEURL4,EGR3,IRX3,THBS1,ELK1
887	ZNF699	791.3	ARCHS4 Coexpression,1179;Enrichr Queries,1043;GTEx Coexpression,152	JUN,ANKRD33B,CEBPD,ADAM9,THBS1,BIRC3
888	ZNF624	791.7	ARCHS4 Coexpression,237;Enrichr Queries,661;GTEx Coexpression,1477	NR4A2,NFKBIA,BTG2,JUN,NEURL4,DUSP10,TUBA1A,CEBPD,THBS1
889	BRF2	791.7	ARCHS4 Coexpression,1222;ReMap ChIP-seq,273;GTEx Coexpression,880	NFKBIA,FOSB,BIRC3
890	ISL1	792	ARCHS4 Coexpression,1151;Enrichr Queries,781;GTEx Coexpression,444	NR4A2,BTG2,EGR2,JUN,IRX3,AMD1,THBS1
891	SOX8	792.3	ARCHS4 Coexpression,1612;Enrichr Queries,417;GTEx Coexpression,348	NR4A2,NR4A1,BTG2,EGR2,JUN,TUBA1A,EGR3,SDC4,IRX3,FOSB,THBS1
892	NPAS1	792.3	ARCHS4 Coexpression,614;Enrichr Queries,291;GTEx Coexpression,1472	NR4A2,NR4A1,BTG2,EGR2,JUN,EGR3,CEBPD,PLAU,IRX3,LONP1,FOSB
893	ZNF23	793	ARCHS4 Coexpression,746;Enrichr Queries,391;GTEx Coexpression,1242	KLF10,NR4A2,NR4A1,BTG2,EGR2,JUN,TUBA1A,SDC4,FOSB,THBS1,GEM
894	ZNF286A	793	ARCHS4 Coexpression,221;Enrichr Queries,782;GTEx Coexpression,1376	NR4A1,BTG2,JUN,TUBA1A,SKIDA1,LONP1,THBS1
895	ZNF831	793.3	ARCHS4 Coexpression,709;Enrichr Queries,744;GTEx Coexpression,927	IFIH1,EGR2,IRF1,TNFRSF9,ICAM1,BIRC3
896	ZXDA	793.3	ARCHS4 Coexpression,769;Enrichr Queries,700;GTEx Coexpression,911	KLF10,NR4A2,JUN,BTG2,DUSP10,CEBPD,NFKBIZ,THBS1
897	ZNF460	795.3	ARCHS4 Coexpression,1599;Enrichr Queries,715;GTEx Coexpression,72	KLF10,BRD2,BTG2,JUN,ANKRD33B,NOL10,NFKBIE,THBS1,ICAM1,BIRC3
898	OTP	795.7	ARCHS4 Coexpression,826;Enrichr Queries,1009;GTEx Coexpression,552	NR4A2,EGR2,TUBA1A,EGR3,IRX3
899	NEUROD1	796.3	ARCHS4 Coexpression,1251;Enrichr Queries,790;ReMap ChIP-seq,205;GTEx Coexpression,939	BTG2,EGR2,JUN,EGR3,MEPCE,TNFAIP2,THBS1,ICAM1,NR4A2,LYL1,NEURL4,FOSB
900	ZFP30	797	ARCHS4 Coexpression,771;Enrichr Queries,595;GTEx Coexpression,1025	KLF10,BTG2,EGR2,JUN,TUBA1A,NFKBIZ,FOSB,THBS1,GEM
901	ZNF439	797.3	ARCHS4 Coexpression,1400;Enrichr Queries,549;GTEx Coexpression,443	NR4A2,BTG2,JUN,DUSP10,CEBPD,NFKBIZ,LONP1,ZBED5,THBS1
902	ZNF7	797.3	ARCHS4 Coexpression,1296;Enrichr Queries,402;GTEx Coexpression,694	KLF10,NFKBIA,NR4A1,BTG2,JUN,IRF1,LONP1,FOSB,ZBED5,THBS1
903	TOPORS	797.5	ARCHS4 Coexpression,111;GTEx Coexpression,1484	NEURL4,AMD1,LONP1
904	ZNF114	797.7	ARCHS4 Coexpression,731;Enrichr Queries,713;GTEx Coexpression,949	JUN,NEURL4,CEBPD,PLAU,LONP1,THBS1,ICAM1,BIRC3
905	ZNF385A	798.7	ARCHS4 Coexpression,1453;Enrichr Queries,214;GTEx Coexpression,729	BTG2,EGR2,JUN,CEBPD,SDC4,TNFAIP2,THBS1,ICAM1,NFKBIA,NR4A1,PLAU,LONP1,FOSB,IRF6
906	ZBTB12	799	ARCHS4 Coexpression,331;Enrichr Queries,486;GTEx Coexpression,1580	BRD2,NR4A1,BTG2,EGR2,JUN,NEURL4,SDC4,IRF1,IRX3,LONP1,THBS1
907	ZNF26	799.7	ARCHS4 Coexpression,1340;Enrichr Queries,374;GTEx Coexpression,685	KLF10,NR4A2,EGR2,JUN,ANKRD33B,NR4A3,HMGCS1,IRF1,FOSB,THBS1,BIRC3
908	KLF14	800	ARCHS4 Coexpression,1123;Enrichr Queries,477	NR4A2,NR4A1,EGR2,JUN,EGR3,NR4A3,IRX3,FOSB,THBS1
909	SCRT2	800	ARCHS4 Coexpression,591;Enrichr Queries,832;GTEx Coexpression,977	NR4A2,BTG2,EGR2,JUN,EGR3,NR4A3,TUBA1A
910	ZFX	801.2	Literature ChIP-seq,141;ARCHS4 Coexpression,1610;Enrichr Queries,1309;ReMap ChIP-seq,190;GTEx Coexpression,756	NANOS1,BRD2,JUN,SKIDA1,MEPCE,TNFAIP2,ICAM1,PTBP3,NR4A2,NFKBIA,LYL1,NEURL4,DPH3,LONP1,FOSB,IRF6,BIRC3
911	NR6A1	801.3	ARCHS4 Coexpression,438;Enrichr Queries,676;GTEx Coexpression,1290	NR4A2,NR4A1,BTG2,JUN,NR4A3,SKIDA1,LONP1,THBS1,GULP1
912	ZNF34	801.3	ARCHS4 Coexpression,891;Enrichr Queries,79;GTEx Coexpression,1434	KLF10,BRD2,BTG2,EGR2,JUN,EGR3,HMGCS1,CEBPD,GEM,RELB,NR4A2,NFKBIA,NR4A1,DUSP10,TUBA1A,IRF1,LONP1,FOSB
913	SMAD5	802.8	ARCHS4 Coexpression,529;Enrichr Queries,1150;ReMap ChIP-seq,186;GTEx Coexpression,1346	BRD2,BTG2,NEURL4,JUN,IRF1,LONP1,NFKBIE,THBS1,HSPA1B,ICAM1,PTBP3
914	FOXB1	804	ARCHS4 Coexpression,975;Enrichr Queries,876;GTEx Coexpression,561	NR4A2,EGR2,JUN,TUBA1A,EGR3,IRX3,SKIDA1
915	MEIS2	804.5	ARCHS4 Coexpression,760;Enrichr Queries,936;ReMap ChIP-seq,5;GTEx Coexpression,1517	KLF10,BTG2,JUN,ANKRD33B,SDC4,IRX3,MEPCE,CXCL3,ELK1,THBS1,PTBP3,NR4A2,DUSP10,NR4A3,TUBA1A,PDIK1L,FOSB,CD59,HSPA1B
916	ZBTB4	804.7	ARCHS4 Coexpression,527;Enrichr Queries,943;GTEx Coexpression,944	KLF10,BTG2,JUN,NEURL4,SDC4,THBS1
917	ZNF653	805	ARCHS4 Coexpression,296;Enrichr Queries,1069;GTEx Coexpression,1050	BRD2,NR4A1,JUN,NEURL4,LONP1,FOSB
918	RFX4	805.3	ARCHS4 Coexpression,149;Enrichr Queries,1250;GTEx Coexpression,1017	NR4A2,EGR2,TUBA1A,HMGCS1,PTBP3
919	NKX63	806.5	ARCHS4 Coexpression,453;GTEx Coexpression,1160	HMGCS1
920	PRMT3	806.7	ARCHS4 Coexpression,608;Enrichr Queries,1302;GTEx Coexpression,510	JUN,AMD1,NOL10
921	ZNF821	806.7	ARCHS4 Coexpression,832;Enrichr Queries,437;GTEx Coexpression,1151	KLF10,NR4A2,NR4A1,BTG2,EGR2,JUN,TUBA1A,EGR3,FOSB,THBS1
922	ZNF3	807	ARCHS4 Coexpression,1003;Enrichr Queries,944;GTEx Coexpression,474	NR4A2,BRD2,NR4A1,BTG2,JUN,FSCN3,THBS1
923	TBX1	808.7	ARCHS4 Coexpression,1016;Enrichr Queries,143;GTEx Coexpression,1267	BTG2,EGR2,JUN,EGR3,CEBPD,VDR,IRX3,TNFAIP2,THBS1,ICAM1,NR4A2,NR4A1,NR4A3,FOSB,FAM71A
924	ZNF708	809.3	ARCHS4 Coexpression,534;Enrichr Queries,1144;GTEx Coexpression,750	BTG2,TUBA1A,THBS1,BIRC3
925	PBX1	809.8	Literature ChIP-seq,140;ARCHS4 Coexpression,874;Enrichr Queries,918;GTEx Coexpression,1307	NR4A2,BTG2,JUN,TUBA1A,DUSP10,NR4A3,AMD1,IRF6,CXCL3,NFKBIE,THBS1
926	FOXD4L5	810	ARCHS4 Coexpression,1075;Enrichr Queries,1237;GTEx Coexpression,118	NANOS1,NR4A2,NR4A3,CD59
927	NR3C2	811.3	ARCHS4 Coexpression,784;Enrichr Queries,767;GTEx Coexpression,883	NR4A2,EGR2,JUN,NR4A3,FOSB,TRIM15,THBS1
928	ZNF44	812.7	ARCHS4 Coexpression,1328;Enrichr Queries,616;GTEx Coexpression,494	NR4A2,BRD2,BTG2,JUN,IRF1,LONP1,FOSB,THBS1,BIRC3
[truncated: 704 more rows]
