# Supplementary material for: Cytoplasmic mRNA decay represses RNA polymerase II transcription during early apoptosis
Source: eLife. 2021 Jun 4;10:e58342. doi: 10.7554/eLife.58342 (PMC8192121; doi:10.7554/eLife.58342)
Supplement: Supplementary file 1. — (A) p values calculated by statistical tests employed in this study. (B) RT-(q)PCR primer sequences [file elife-58342-supp1.xlsx]

## Sheet: Supplementary File 1A
Figure panel	Statistical test	p values (left to right) – p<0.05
1C	One sample t test	ACTB: 0.6275, 0.0042, 0.0008, 0.01, 0.0007
		GAPDH: 0.6722, 0.0052, 0.0034, 0.0016, 0.0023
		EEF1A: 0.0825, 0.1411, 0.0440, 0.0109, 0.0009
		PP1A: 0.0739, 0.0302, 0.0082, 0.0052, 0.0011
		U6: 0.0484, 0.0277, 0.0119, 0.0101, 0.0061
		7SK: 0.5943, 0.1381, 0.0040, 0.0328, 0.3710
1D	One sample t test	ACTB: 0.0574, 0.0054, 0.0009, 0.0003, <0.0001
		GAPDH: 0.1509, 0.0050, 0.0046, 0.0285, 0.0064
		EEF1A: 0.4553, 0.0026, 0.0066, 0.0079, 0.0080
		PP1A: 0.7914, 0.0875, 0.0111, 0.0058, 0.0036
		U6: 0.7156, 0.7929, 0.9209, 0.0058, 0.0036
		7SK: 0.3512, 0.4182, 0.2577, 0.0057, 0.0154
2A	One sample t test	ACTB: 0.0016, 0.4365
		GAPDH: 0.0021, 0.6110
		7SK: 0.1385, 0.3771
	Student’s t tests compared to mock	ACTB: 0.043561
		GAPDH: 0.006824
		7SK: 0.068550
2B	One sample t test	ACTB: 0.0007, 0.2203
		GAPDH: 0.0014, 0.1340
		7SK: 0.24447, 0.1639
	Student’s t tests compared to mock	ACTB: 0.003915
		GAPDH: 0.010886
		7SK: 0.493599
3B	One sample t test	ACTB: 0.0074, 0.0057, 0.1209, 0.0143
		GAPDH: 0.0138, 0.0121, 0.6858, 0.0062
		7SK: 0.4034, 0.0121, 0.6858, 0.5696
3C	Student's t test compared to scramble	CASP8: 0.051357
		CASP3: 0.250594
3D	One sample t test	ACTB: 0.0001, 0.5467
		GAPDH: 0.0003, 0.015
		7SK: 0.4229, 0.7534
	Student's t test compared to scramble	ACTB: 0.014509
		GAPDH: 0.024809
		7SK: 0.670119
3E	One sample t test	ACTB: 0.0082, 0.0025
		GAPDH: 0.0090, 0.0467
		7SK: 0.2696, 0.0721
	Student’s t test compared to mock	ACTB: 0.393327
		GAPDH: 0.472017
		7SK: 0.715061
3F	One sample t test	ACTB: 0.0085, 0.0025
		GAPDH: 0.0285, 0.0107
		7SK: 0.3539, 0.5801
	Student’s t test compared to mock	ACTB: 0.669835
		GAPDH: 0.910866
		7SK: 0.499673
4A	Multiple t tests (with Holm-Sidak correction)	0.043886, 0.215767
4B	One sample t test	ACTB: 0.0002, 0.0042, 0.0013
		GAPDH: 0.0021, 0.0209, 0.0066
		7SK: 0.3631, 0.3611, 0.0791
	Multiple t tests compared to scramble (with Holm-Sidak correction)	ACTB: 0.016595, 0.193276
		GAPDH: 0.017579, 0.220249
		7SK: 0.877066, 0.216338
4C	One sample t test	ACTB: 0.0014, 0.1667, 0.0239
		GAPDH: 0.0083, 0.0326, 0.0198
		7SK: 0.3724, 6694, 0.1516
	Multiple t tests compared to scramble (with Holm-Sidak correction)	ACTB: 0.006821, 0.701192
		GAPDH: 0.041092, 0.701192
		7SK: 0.297487, 0.747340
4D	One sample t test	ACTB: 0.0476, 0.5621, 0.0472
		GAPDH: 0.0173, 0.8710, 0.0032
	Multiple t tests compared to scramble (with Holm-Sidak correction)	ACTB: 0.033214, 0.746973
		GAPDH: 0.018311, 0.989914
4E	One sample t test	ACTB: 0.0431, 0.0186, 0.0133
		GAPDH: 0.0245, 0.1142, 0.0449
	Multiple t tests compared to scramble (with Holm-Sidak correction)	ACTB: 0.019729, 0.952359
		GAPDH: 0.002993, 0.866582
5A	One sample t test	nuclear: 0.0479, 0.0902, 0.1778
		cytoplasmic: 0.5678, 0.2650, 0.0537
	Multiple t tests compared to scramble (with Holm-Sidak correction)	nuclear: 0.769900, 0.008435
		cytoplasmic: 0.265521, 0.106189
5B	One sample t test (NCL nuclear expression)	0.0627, 0.0926, 0.0039
5C	One sample t test	ACTB: 0.0206, 0.0606
		GAPDH: 0.0402, 0.1094
		7SK: 0.1163, 0.7467
	Student’s t test compared to mock	ACTB: 0.017451
		GAPDH: 0.007362
		7SK: 0.0798434
5D	One sample t test	ACTB: 0.0016, 0.0120
		GAPDH: 0.0086, 0.0327
		7SK: 0.1461, 0.6489
	Student’s t test compared to mock	ACTB: 0.129599
		GAPDH: 0.397279
		7SK: 0.104037
5E	One sample t test	ACTB: 0.0121, 0.3841
		GAPDH: 0.0070, 0.8664
	Student’s t test compared to mock	ACTB: 0.013396
		GAPDH: 0.008228
S1A	One sample t test	CHMP2A: 0.1277, 0.0222, 0.0061, 0.0011, 0.0021
		DDX6: 0.2474, 0.0163, 0.0019, 0.0013, 0.0002
		RPB2: 0.2205, 0.0016, 0.0017, 0.0004, 0.0006
		RPLP0: 0.0401, 0.0024, 0.0026, 0.0004, 0.0006
		7SL: 0.4239, 0.8599, 0.7171, 0.9630, 0.6406
		5S: 0.2611, 0.9779, 0.1858, 0.5479, 0.6118
S1C	One sample t test	CHMP2A: 0.7175, 0.0013, 0.0071, 0.0214, 0.0037
		DDX6: 0.3845, 0.0059, 0.0098, 0.0090, 0.0180,
		RPB2: 0.8370, 0.0003, 0.0036, 0.1779, 0.4224
		RPLP0: 0.8430, <0.0001, 0.0077, 0.0087, 0.0025
		7SL: 0.3216, 0.2552, 0.0290, 0.0347, 0.0391
		5S: 0.2600, 0.9375, 0.3424, 0.0053, 0.1829
S2B	Student's t test: mock vs zVAD	FKPM: 0.006104
		qPCR (exon): 0.003826
		qPCR (intron): 0.008917
S3A	One sample t test	ACTB: 0.0010, 0.0024, 0.5597
		GAPDH: 0.0022, 0.0258, 0.6923
		7SK: 0.3490, 0.4253, 0.1501
	Multiple t tests compared to scramble (with Holm-Sidak correction)	ACTB: 0.333499, 0.012705,
		GAPDH: 0.333499, 0.022928
		7SK: 0.333499, 0.070286
S3B	Multiple tests compared to 0 hr TRAIL (with Holm-Sidak correction)	0.509028, 0.601488, 0.020558
S3C	One sample t test	RPB1: 0.4005, 0.1598
		RPB2: 0.0064, 0.3501
		RPB3: 0.2731, 0.875
		RPB4: 0.0139, 0.9521
	Student’s t test compared to mock	RPB1: 0.740780
		RPB2: 0.010320
		RPB3: 0.274904
		RPB4: 0.541371
S3D	One sample t test	ACTB: 0.0271, 0.8531
		GAPDH: 0.0105, 0.4677
		7SK: 0.1640, 0.5949
	Student's t test compared to scramble	ACTB: 0.015932
		GAPDH: 0.002670
		7SK: 0.106530
S4A	One sample t test	ACTB: <0.0001, 0.0001, 0.0001, 0.0240
		GAPDH: 0.0005, 0.0046, 0.0023, 0.1207
		7SK: 0.3736, 0.3181, 0.5551, 0.3280
	Multiple t tests compared to scramble (with Holm-Sidak correction)	ACTB: 0.034750, 0.343791, 0.063487
		GAPDH: 0.192558, 0.567179, 0.031699
		7SK: 0.192558, 0.567179, 0.191405
S4B	One sample t test	ACTB: 0.0098, 0.0268, 0.0714, 0.0989
		GAPDH: 0.0266, 0.0106, 0.0145, 0.2675
		7SK: 0.8624, 0.1041, 0.4802, 0.0578
	Multiple t tests compared to scramble (with Holm-Sidak correction)	ACTB: 0.373268, 0.238112, 0.355995
		GAPDH: 0.373268, 0.639466, 0.355995
		7SK: 0.373268, 0.639466, 0.355995
S4C	One sample t test	ACTB: 0.0345, 0.0003, 0.7041
		GAPDH: 0.0182, 0.0512, 0.5719
	Multiple t tests compared to scramble (with Holm-Sidak correction)	ACTB: 0.093502, 0.021631
		GAPDH: 0.795924, 0.019267
S5A	One sample t test	ACTB: 0.0154, 0.0002
		GAPDH: 0.0122, 0.0063
		7SK: 0.1929, 0.5491
	Student’s t test compared to mock	ACTB: 0.097689
		GAPDH: 0.127717
		7SK: 0.615415
S5D	One sample t test	nuclear: 0.3711, 0.0639, 0.0405
		cytoplasmic: 0.2589, 0.2792, 0.2232

## Sheet: Supplementary File 1B
Gene	Forward sequence	Reverse sequence
RT-(q)PCR
ACTB (exon)	CATGTACGTTGCTATCCAGGC	CTCCTTAATGTCACGCACGAT
ACTB (intron)	CGACAGGATGCAGAAGGAGA	ATGGAGGACCCTGGATGTGA
GAPDH	CAACGGATTTGGTCGTATTGG	GCAACAATATCCACTTTACCAGAGTTAA
EEF1A	TGTCGTCATTGGACACGTAGA	ACGCTCAGCTTTCAGTTTATCC
PP1A	TCCTGGCATCTTGTCCATG	CCATCCAACCACTCAGTCTTG
CHMP2A	CGCGAGCGACAGAAACTAGAG	CCCGCATCAATACAAACTTGC
DDX6	CAGGAACATCGAAATCGTG	TCCAATACGATGGAGATAGG
RPB2	CCTGAGGGTGACGAGGATCT	GTGCTTCCATTCCGCATACAG
RPLP0	GCAGCATCTACAACCCTGAAG	CACTGGCAACATTGCGGAC
U6	CGCTTCGGCAGCACATATAC	AAAATATGGAACGCTTCACGA
7SK	CCCCTGCTAGAACCTCCAAAC	CACATGCAGCGCCTCATTT
7SL	ATCGGGTGTCCGCACTAAGTT	CAGCACGGGAGTTTTGACCT
5S	GGCCATACCACCCTGAACGC	CAGCACCCGGTATTCCCAGG
18S	GTGGAGCGATTTGTCTGGTT	CGCTGAGCCAGTCAGTGTAG
ChIP
ACTB promoter	CCGAAAGTTGCCTTTTATGG	GCCGCTGGGTTTTATAGGG
GAPDH promoter	TACTAGCGGTTTTACGGGCG	TCGAACAGGAGGAGCAGAGACCGA
