# Supplementary material for: Cytoplasmic mRNA decay represses RNA polymerase II transcription during early apoptosis
Source: eLife. 2021 Jun 4;10:e58342. doi: 10.7554/eLife.58342 (PMC8192121; doi:10.7554/eLife.58342)
Supplement: Supplementary file 2. — No statistically significant (FDR < 0.05) enrichments were identified. [file elife-58342-supp2.xlsx]

## Sheet: Supplementary File 2
Analysis Type:	PANTHER Overrepresentation Test (Released 20210224)
Annotation Version and Release Date:	GO Ontology database DOI: 10.5281/zenodo.4495804 Released 2021-02-01
Analyzed List:	upload_1 (Homo sapiens)
Reference List:	Reference list DMSO.txt (Homo sapiens)	There are duplicate IDs in the file. The unique set of IDs will be used.
Test Type:	FISHER
Correction:	FDR
GO biological process complete	Reference list DMSO.txt - REFLIST (13391)	upload_1 (724)	upload_1 (expected)	upload_1 (over/under)	upload_1 (fold Enrichment)	upload_1 (raw P-value)	upload_1 (FDR)
positive regulation of intestinal cholesterol absorption (GO:0045797)	1	1	0.05	+	18.5	0.1	1
nucleus accumbens development (GO:0021768)	1	1	0.05	+	18.5	0.1	1
hexitol catabolic process (GO:0019407)	1	1	0.05	+	18.5	0.1	1
axon target recognition (GO:0007412)	1	1	0.05	+	18.5	0.1	1
conversion of methionyl-tRNA to N-formyl-methionyl-tRNA (GO:0071951)	1	1	0.05	+	18.5	0.1	1
regulation of SUMO transferase activity (GO:1903182)	1	1	0.05	+	18.5	0.1	1
fatty alcohol metabolic process (GO:1903173)	2	2	0.11	+	18.5	0.0147	1
1-phosphatidyl-1D-myo-inositol 3,5-bisphosphate metabolic process (GO:1903100)	1	1	0.05	+	18.5	0.1	1
histone H3-T3 phosphorylation (GO:0072355)	1	1	0.05	+	18.5	0.1	1
positive regulation of large conductance calcium-activated potassium channel activity (GO:1902608)	1	1	0.05	+	18.5	0.1	1
malonyl-CoA catabolic process (GO:2001294)	1	1	0.05	+	18.5	0.1	1
negative regulation of phosphatidylcholine biosynthetic process (GO:2001246)	1	1	0.05	+	18.5	0.1	1
regulation of exocyst assembly (GO:0001928)	1	1	0.05	+	18.5	0.1	1
metanephric proximal convoluted tubule development (GO:0072229)	1	1	0.05	+	18.5	0.1	1
sesquiterpenoid metabolic process (GO:0006714)	1	1	0.05	+	18.5	0.1	1
negative regulation of endocytic recycling (GO:2001136)	1	1	0.05	+	18.5	0.1	1
regulation of exocyst localization (GO:0060178)	1	1	0.05	+	18.5	0.1	1
olfactory pit development (GO:0060166)	1	1	0.05	+	18.5	0.1	1
positive regulation of histone H4-K16 acetylation (GO:2000620)	1	1	0.05	+	18.5	0.1	1
positive regulation of inward rectifier potassium channel activity (GO:1901980)	1	1	0.05	+	18.5	0.1	1
establishment of natural killer cell polarity (GO:0001770)	1	1	0.05	+	18.5	0.1	1
phytol metabolic process (GO:0033306)	2	2	0.11	+	18.5	0.0147	1
proximal convoluted tubule development (GO:0072019)	1	1	0.05	+	18.5	0.1	1
cellular response to endothelin (GO:1990859)	1	1	0.05	+	18.5	0.1	1
response to endothelin (GO:1990839)	1	1	0.05	+	18.5	0.1	1
negative regulation of post-translational protein modification (GO:1901874)	1	1	0.05	+	18.5	0.1	1
negative regulation of FasL production (GO:0045221)	1	1	0.05	+	18.5	0.1	1
regulation of FasL production (GO:0045219)	1	1	0.05	+	18.5	0.1	1
GCN2-mediated signaling (GO:0140469)	2	2	0.11	+	18.5	0.0147	1
cell cycle DNA replication maintenance of fidelity (GO:1902298)	2	2	0.11	+	18.5	0.0147	1
endocrine signaling (GO:0038002)	1	1	0.05	+	18.5	0.1	1
positive regulation of gamma-aminobutyric acid secretion (GO:0014054)	1	1	0.05	+	18.5	0.1	1
peptidyl-proline hydroxylation to 3-hydroxy-L-proline (GO:0018400)	1	1	0.05	+	18.5	0.1	1
negative regulation of timing of anagen (GO:0051886)	1	1	0.05	+	18.5	0.1	1
cellular response to anoxia (GO:0071454)	1	1	0.05	+	18.5	0.1	1
positive regulation of neutrophil mediated killing of gram-negative bacterium (GO:0070963)	1	1	0.05	+	18.5	0.1	1
positive regulation of neutrophil mediated killing of bacterium (GO:0070962)	1	1	0.05	+	18.5	0.1	1
positive regulation of neutrophil mediated killing of symbiont cell (GO:0070961)	1	1	0.05	+	18.5	0.1	1
positive regulation of neutrophil mediated cytotoxicity (GO:0070960)	1	1	0.05	+	18.5	0.1	1
regulation of neutrophil mediated killing of gram-negative bacterium (GO:0070951)	1	1	0.05	+	18.5	0.1	1
regulation of neutrophil mediated killing of bacterium (GO:0070950)	1	1	0.05	+	18.5	0.1	1
regulation of neutrophil mediated killing of symbiont cell (GO:0070949)	1	1	0.05	+	18.5	0.1	1
peptide amidation (GO:0001519)	1	1	0.05	+	18.5	0.1	1
protein tyrosinylation (GO:0018322)	1	1	0.05	+	18.5	0.1	1
mitochondrial membrane fusion (GO:1990613)	1	1	0.05	+	18.5	0.1	1
positive regulation of synoviocyte proliferation (GO:1901647)	1	1	0.05	+	18.5	0.1	1
regulation of synoviocyte proliferation (GO:1901645)	1	1	0.05	+	18.5	0.1	1
negative regulation of neutrophil apoptotic process (GO:0033030)	1	1	0.05	+	18.5	0.1	1
negative regulation of mast cell apoptotic process (GO:0033026)	1	1	0.05	+	18.5	0.1	1
protein catabolic process at synapse (GO:0140246)	1	1	0.05	+	18.5	0.1	1
positive regulation of translational initiation in response to starvation (GO:0071264)	2	2	0.11	+	18.5	0.0147	1
regulation of translational initiation in response to starvation (GO:0071262)	2	2	0.11	+	18.5	0.0147	1
transport of viral material towards nucleus (GO:0075606)	1	1	0.05	+	18.5	0.1	1
response to benomyl (GO:1901561)	1	1	0.05	+	18.5	0.1	1
mitotic DNA replication maintenance of fidelity (GO:1990505)	2	2	0.11	+	18.5	0.0147	1
positive regulation of acylglycerol transport (GO:1901508)	1	1	0.05	+	18.5	0.1	1
regulation of acylglycerol transport (GO:1901506)	1	1	0.05	+	18.5	0.1	1
cytosol to ERGIC protein transport (GO:0106273)	1	1	0.05	+	18.5	0.1	1
protein localization to ERGIC (GO:0106272)	1	1	0.05	+	18.5	0.1	1
protein catabolic process, modulating synaptic transmission (GO:0099546)	1	1	0.05	+	18.5	0.1	1
slow endocytic recycling (GO:0032458)	1	1	0.05	+	18.5	0.1	1
C-terminal protein-tyrosinylation (GO:0018166)	1	1	0.05	+	18.5	0.1	1
microtubule-dependent intracellular transport of viral material towards nucleus (GO:0075521)	1	1	0.05	+	18.5	0.1	1
positive regulation of triglyceride transport (GO:1905885)	1	1	0.05	+	18.5	0.1	1
regulation of triglyceride transport (GO:1905883)	1	1	0.05	+	18.5	0.1	1
microtubule-dependent intracellular transport of viral material (GO:0075519)	1	1	0.05	+	18.5	0.1	1
mitotic recombination-dependent replication fork processing (GO:1990426)	2	2	0.11	+	18.5	0.0147	1
positive regulation of mitochondrial DNA replication (GO:0090297)	1	1	0.05	+	18.5	0.1	1
protein amidation (GO:0018032)	1	1	0.05	+	18.5	0.1	1
sorbitol catabolic process (GO:0006062)	1	1	0.05	+	18.5	0.1	1
antisense RNA transcript catabolic process (GO:0071041)	1	1	0.05	+	18.5	0.1	1
nuclear polyadenylation-dependent antisense transcript catabolic process (GO:0071040)	1	1	0.05	+	18.5	0.1	1
nuclear polyadenylation-dependent CUT catabolic process (GO:0071039)	1	1	0.05	+	18.5	0.1	1
nuclear polyadenylation-dependent snRNA catabolic process (GO:0071037)	1	1	0.05	+	18.5	0.1	1
nuclear polyadenylation-dependent snoRNA catabolic process (GO:0071036)	1	1	0.05	+	18.5	0.1	1
radial pattern formation (GO:0009956)	1	1	0.05	+	18.5	0.1	1
positive regulation of sterol regulatory element binding protein cleavage (GO:1901310)	1	1	0.05	+	18.5	0.1	1
regulation of sterol regulatory element binding protein cleavage (GO:1901308)	1	1	0.05	+	18.5	0.1	1
positive regulation of histone H4-K20 methylation (GO:0070512)	1	1	0.05	+	18.5	0.1	1
regulation of histone H4-K20 methylation (GO:0070510)	1	1	0.05	+	18.5	0.1	1
transcription open complex formation at RNA polymerase II promoter (GO:0001113)	1	1	0.05	+	18.5	0.1	1
positive regulation of vesicle docking (GO:0106022)	1	1	0.05	+	18.5	0.1	1
regulation of vesicle docking (GO:0106020)	2	2	0.11	+	18.5	0.0147	1
'de novo' AMP biosynthetic process (GO:0044208)	1	1	0.05	+	18.5	0.1	1
positive regulation of metanephric cap mesenchymal cell proliferation (GO:0090096)	1	1	0.05	+	18.5	0.1	1
regulation of metanephric cap mesenchymal cell proliferation (GO:0090095)	1	1	0.05	+	18.5	0.1	1
negative regulation of extracellular matrix assembly (GO:1901202)	1	1	0.05	+	18.5	0.1	1
carbamoyl phosphate biosynthetic process (GO:0070409)	1	1	0.05	+	18.5	0.1	1
carbamoyl phosphate metabolic process (GO:0070408)	1	1	0.05	+	18.5	0.1	1
oxidation-dependent protein catabolic process (GO:0070407)	1	1	0.05	+	18.5	0.1	1
regulation of carbohydrate utilization (GO:0043610)	1	1	0.05	+	18.5	0.1	1
copper ion import across plasma membrane (GO:0098705)	1	1	0.05	+	18.5	0.1	1
L-xylitol metabolic process (GO:0051164)	1	1	0.05	+	18.5	0.1	1
L-xylitol catabolic process (GO:0051160)	1	1	0.05	+	18.5	0.1	1
ESCRT III complex assembly (GO:1904902)	1	1	0.05	+	18.5	0.1	1
re-entry into mitotic cell cycle (GO:0000320)	2	2	0.11	+	18.5	0.0147	1
positive regulation of strand invasion (GO:0098530)	1	1	0.05	+	18.5	0.1	1
ESCRT complex assembly (GO:1904895)	1	1	0.05	+	18.5	0.1	1
mitochondrial threonyl-tRNA aminoacylation (GO:0070159)	1	1	0.05	+	18.5	0.1	1
negative regulation of G1/S transition of mitotic cell cycle by negative regulation of transcription from RNA polymerase II promoter (GO:1900477)	1	1	0.05	+	18.5	0.1	1
pyridoxal 5'-phosphate salvage (GO:0009443)	1	1	0.05	+	18.5	0.1	1
pathogenesis (GO:0009405)	1	1	0.05	+	18.5	0.1	1
antisense RNA metabolic process (GO:0042868)	1	1	0.05	+	18.5	0.1	1
negative regulation of protein localization to nucleolus (GO:1904750)	1	1	0.05	+	18.5	0.1	1
cell-abiotic substrate adhesion (GO:0036164)	1	1	0.05	+	18.5	0.1	1
positive regulation of intestinal lipid absorption (GO:1904731)	1	1	0.05	+	18.5	0.1	1
pyridoxal phosphate biosynthetic process (GO:0042823)	2	2	0.11	+	18.5	0.0147	1
regulation of intestinal lipid absorption (GO:1904729)	1	1	0.05	+	18.5	0.1	1
response to rotenone (GO:1904647)	1	1	0.05	+	18.5	0.1	1
response to glucoside (GO:1904631)	1	1	0.05	+	18.5	0.1	1
positive regulation of nodal signaling pathway involved in determination of lateral mesoderm left/right asymmetry (GO:1900224)	1	1	0.05	+	18.5	0.1	1
positive regulation of renin secretion into blood stream (GO:1900135)	1	1	0.05	+	18.5	0.1	1
negative regulation of renin secretion into blood stream (GO:1900134)	1	1	0.05	+	18.5	0.1	1
regulation of renin secretion into blood stream (GO:1900133)	2	2	0.11	+	18.5	0.0147	1
histone H3-T6 phosphorylation (GO:0035408)	1	1	0.05	+	18.5	0.1	1
lipoate biosynthetic process (GO:0009107)	1	1	0.05	+	18.5	0.1	1
positive regulation of intestinal absorption (GO:1904480)	1	1	0.05	+	18.5	0.1	1
fatty acid primary amide metabolic process (GO:0062126)	1	1	0.05	+	18.5	0.1	1
fatty acid primary amide biosynthetic process (GO:0062112)	1	1	0.05	+	18.5	0.1	1
evoked neurotransmitter secretion (GO:0061670)	1	1	0.05	+	18.5	0.1	1
UDP-xylose transmembrane transport (GO:0015790)	1	1	0.05	+	18.5	0.1	1
plasma membrane copper ion transport (GO:0015679)	1	1	0.05	+	18.5	0.1	1
negative regulation of iodide transmembrane transport (GO:1904213)	1	1	0.05	+	18.5	0.1	1
regulation of iodide transmembrane transport (GO:1904212)	1	1	0.05	+	18.5	0.1	1
positive regulation of skeletal muscle hypertrophy (GO:1904206)	1	1	0.05	+	18.5	0.1	1
regulation of skeletal muscle hypertrophy (GO:1904204)	1	1	0.05	+	18.5	0.1	1
negative regulation of iodide transport (GO:1904202)	1	1	0.05	+	18.5	0.1	1
regulation of iodide transport (GO:1904201)	1	1	0.05	+	18.5	0.1	1
regulation of intestinal cholesterol absorption (GO:0030300)	1	1	0.05	+	18.5	0.1	1
charged-tRNA amino acid modification (GO:0019988)	1	1	0.05	+	18.5	0.1	1
protein localization to vacuolar membrane (GO:1903778)	1	1	0.05	+	18.5	0.1	1
positive regulation of SUMO transferase activity (GO:1903755)	1	1	0.05	+	18.5	0.1	1
positive regulation of granulosa cell proliferation (GO:1904197)	1	1	0.05	+	18.5	0.1	1
regulation of granulosa cell proliferation (GO:1904195)	1	1	0.05	+	18.5	0.1	1
negative regulation of cholangiocyte apoptotic process (GO:1904193)	1	1	0.05	+	18.5	0.1	1
regulation of cholangiocyte apoptotic process (GO:1904192)	1	1	0.05	+	18.5	0.1	1
lymphatic endothelial cell fate commitment (GO:0060838)	1	1	0.05	+	18.5	0.1	1
optic cup formation involved in camera-type eye development (GO:0003408)	1	1	0.05	+	18.5	0.1	1
development of secondary male sexual characteristics (GO:0046544)	1	1	0.05	+	18.5	0.1	1
regulation of nucleus size (GO:0097298)	1	1	0.05	+	18.5	0.1	1
sphinganine biosynthetic process (GO:0046511)	1	1	0.05	+	18.5	0.1	1
regulation of lysosomal membrane permeability (GO:0097213)	1	1	0.05	+	18.5	0.1	1
cellular response to benomyl (GO:0072755)	1	1	0.05	+	18.5	0.1	1
hexadecanal metabolic process (GO:0046458)	1	1	0.05	+	18.5	0.1	1
guanylate kinase-associated protein clustering (GO:0097117)	1	1	0.05	+	18.5	0.1	1
endoplasmic reticulum-Golgi intermediate compartment organization (GO:0097111)	2	2	0.11	+	18.5	0.0147	1
positive regulation of G1 to G0 transition (GO:1903452)	1	1	0.05	+	18.5	0.1	1
regulation of G1 to G0 transition (GO:1903450)	1	1	0.05	+	18.5	0.1	1
protein localization to endoplasmic reticulum tubular network (GO:1903420)	1	1	0.05	+	18.5	0.1	1
negative regulation of smoothened signaling pathway involved in ventral spinal cord patterning (GO:0021914)	1	1	0.05	+	18.5	0.1	1
positive regulation of homophilic cell adhesion (GO:1903387)	1	1	0.05	+	18.5	0.1	1
pentitol catabolic process (GO:0019527)	1	1	0.05	+	18.5	0.1	1
pentitol metabolic process (GO:0019519)	1	1	0.05	+	18.5	0.1	1
Purkinje myocyte development (GO:0003165)	1	1	0.05	+	18.5	0.1	1
regulation of strand invasion (GO:0060542)	1	1	0.05	+	18.5	0.1	1
propionyl-CoA biosynthetic process (GO:1902860)	1	1	0.05	+	18.5	0.1	1
glossopharyngeal nerve morphogenesis (GO:0021615)	3	2	0.16	+	12.33	0.0237	1
chemokine production (GO:0032602)	3	2	0.16	+	12.33	0.0237	1
dGTP catabolic process (GO:0006203)	3	2	0.16	+	12.33	0.0237	1
pyridoxal phosphate metabolic process (GO:0042822)	3	2	0.16	+	12.33	0.0237	1
vitamin B6 biosynthetic process (GO:0042819)	3	2	0.16	+	12.33	0.0237	1
positive regulation of serine C-palmitoyltransferase activity (GO:1904222)	3	2	0.16	+	12.33	0.0237	1
positive regulation of CDP-diacylglycerol-serine O-phosphatidyltransferase activity (GO:1904219)	3	2	0.16	+	12.33	0.0237	1
regulation of CDP-diacylglycerol-serine O-phosphatidyltransferase activity (GO:1904217)	3	2	0.16	+	12.33	0.0237	1
positive regulation of membrane tubulation (GO:1903527)	3	2	0.16	+	12.33	0.0237	1
cellular response to leucine starvation (GO:1990253)	9	5	0.49	+	10.28	0.000476	1
positive regulation of glutamate secretion, neurotransmission (GO:1903296)	2	1	0.11	+	9.25	0.146	1
regulation of glutamate secretion, neurotransmission (GO:1903294)	2	1	0.11	+	9.25	0.146	1
acrosomal vesicle exocytosis (GO:0060478)	2	1	0.11	+	9.25	0.146	1
heme a metabolic process (GO:0046160)	2	1	0.11	+	9.25	0.146	1
bronchus morphogenesis (GO:0060434)	2	1	0.11	+	9.25	0.146	1
negative regulation of toll-like receptor 3 signaling pathway (GO:0034140)	2	1	0.11	+	9.25	0.146	1
inosine biosynthetic process (GO:0046103)	2	1	0.11	+	9.25	0.146	1
proline catabolic process to glutamate (GO:0010133)	2	1	0.11	+	9.25	0.146	1
positive regulation of melanocyte differentiation (GO:0045636)	2	1	0.11	+	9.25	0.146	1
negative regulation of cell-cell adhesion mediated by integrin (GO:0033633)	2	1	0.11	+	9.25	0.146	1
positive regulation of glucocorticoid secretion (GO:2000851)	2	1	0.11	+	9.25	0.146	1
dGTP metabolic process (GO:0046070)	4	2	0.22	+	9.25	0.0343	1
negative regulation of termination of RNA polymerase II transcription, poly(A)-coupled (GO:2000805)	2	1	0.11	+	9.25	0.146	1
negative regulation of membrane hyperpolarization (GO:1902631)	2	1	0.11	+	9.25	0.146	1
response to anoxia (GO:0034059)	2	1	0.11	+	9.25	0.146	1
Norrin signaling pathway (GO:0110135)	2	1	0.11	+	9.25	0.146	1
regulation of large conductance calcium-activated potassium channel activity (GO:1902606)	2	1	0.11	+	9.25	0.146	1
negative regulation of caveolin-mediated endocytosis (GO:2001287)	2	1	0.11	+	9.25	0.146	1
glycine betaine biosynthetic process from choline (GO:0019285)	2	1	0.11	+	9.25	0.146	1
glossopharyngeal nerve development (GO:0021563)	4	2	0.22	+	9.25	0.0343	1
lactate biosynthetic process (GO:0019249)	2	1	0.11	+	9.25	0.146	1
metanephric proximal tubule development (GO:0072237)	2	1	0.11	+	9.25	0.146	1
positive regulation of eosinophil activation (GO:1902568)	2	1	0.11	+	9.25	0.146	1
positive regulation of dense core granule biogenesis (GO:2000707)	2	1	0.11	+	9.25	0.146	1
heme A biosynthetic process (GO:0006784)	2	1	0.11	+	9.25	0.146	1
DNA strand resection involved in replication fork processing (GO:0110025)	2	1	0.11	+	9.25	0.146	1
cell cycle switching (GO:0060184)	2	1	0.11	+	9.25	0.146	1
positive regulation of male mating behavior (GO:1902437)	2	1	0.11	+	9.25	0.146	1
regulation of male mating behavior (GO:1902435)	2	1	0.11	+	9.25	0.146	1
sphinganine metabolic process (GO:0006667)	2	1	0.11	+	9.25	0.146	1
T-helper 1 cell lineage commitment (GO:0002296)	2	1	0.11	+	9.25	0.146	1
ribosomal protein import into nucleus (GO:0006610)	4	2	0.22	+	9.25	0.0343	1
intracellular transport of viral protein in host cell (GO:0019060)	2	1	0.11	+	9.25	0.146	1
positive regulation of DNA endoreduplication (GO:0032877)	2	1	0.11	+	9.25	0.146	1
proline catabolic process (GO:0006562)	2	1	0.11	+	9.25	0.146	1
negative regulation of peptidyl-serine dephosphorylation (GO:1902309)	2	1	0.11	+	9.25	0.146	1
negative regulation of relaxation of cardiac muscle (GO:1901898)	2	1	0.11	+	9.25	0.146	1
regulation of glutamate uptake involved in transmission of nerve impulse (GO:0051946)	2	1	0.11	+	9.25	0.146	1
positive regulation of catecholamine uptake involved in synaptic transmission (GO:0051944)	2	1	0.11	+	9.25	0.146	1
regulation of amino acid uptake involved in synaptic transmission (GO:0051941)	2	1	0.11	+	9.25	0.146	1
regulation of post-translational protein modification (GO:1901873)	2	1	0.11	+	9.25	0.146	1
cellular response to dsDNA (GO:1990786)	2	1	0.11	+	9.25	0.146	1
response to dsDNA (GO:1990784)	2	1	0.11	+	9.25	0.146	1
leucyl-tRNA aminoacylation (GO:0006429)	2	1	0.11	+	9.25	0.146	1
glutaminyl-tRNA aminoacylation (GO:0006425)	2	1	0.11	+	9.25	0.146	1
snRNA export from nucleus (GO:0006408)	2	1	0.11	+	9.25	0.146	1
zonula adherens assembly (GO:0045186)	2	1	0.11	+	9.25	0.146	1
reduction of food intake in response to dietary excess (GO:0002023)	2	1	0.11	+	9.25	0.146	1
xylulose biosynthetic process (GO:0005999)	2	1	0.11	+	9.25	0.146	1
lactose biosynthetic process (GO:0005989)	2	1	0.11	+	9.25	0.146	1
lactose metabolic process (GO:0005988)	2	1	0.11	+	9.25	0.146	1
regulation of neutrophil mediated cytotoxicity (GO:0070948)	2	1	0.11	+	9.25	0.146	1
interleukin-2 production (GO:0032623)	2	1	0.11	+	9.25	0.146	1
interleukin-13 production (GO:0032616)	2	1	0.11	+	9.25	0.146	1
positive regulation of timing of catagen (GO:0051795)	2	1	0.11	+	9.25	0.146	1
diphosphate metabolic process (GO:0071344)	2	1	0.11	+	9.25	0.146	1
germline cell cycle switching, mitotic to meiotic cell cycle (GO:0051729)	2	1	0.11	+	9.25	0.146	1
cell cycle switching, mitotic to meiotic cell cycle (GO:0051728)	2	1	0.11	+	9.25	0.146	1
positive regulation of postsynaptic membrane organization (GO:1901628)	2	1	0.11	+	9.25	0.146	1
regulation of mast cell apoptotic process (GO:0033025)	2	1	0.11	+	9.25	0.146	1
posttranscriptional tethering of RNA polymerase II gene DNA at nuclear periphery (GO:0000973)	2	1	0.11	+	9.25	0.146	1
negative regulation of hair follicle maturation (GO:0048817)	2	1	0.11	+	9.25	0.146	1
trans-synaptic signaling by endocannabinoid, modulating synaptic transmission (GO:0099553)	2	1	0.11	+	9.25	0.146	1
trans-synaptic signaling by lipid, modulating synaptic transmission (GO:0099552)	2	1	0.11	+	9.25	0.146	1
dAMP biosynthetic process (GO:0006170)	2	1	0.11	+	9.25	0.146	1
adenosine catabolic process (GO:0006154)	2	1	0.11	+	9.25	0.146	1
positive regulation of dopamine uptake involved in synaptic transmission (GO:0051586)	2	1	0.11	+	9.25	0.146	1
entry of viral genome into host nucleus through nuclear pore complex via importin (GO:0075506)	2	1	0.11	+	9.25	0.146	1
positive regulation of mast cell proliferation (GO:0070668)	2	1	0.11	+	9.25	0.146	1
glyoxylate cycle (GO:0006097)	2	1	0.11	+	9.25	0.146	1
sorbitol metabolic process (GO:0006060)	2	1	0.11	+	9.25	0.146	1
chitin catabolic process (GO:0006032)	2	1	0.11	+	9.25	0.146	1
chitin metabolic process (GO:0006030)	2	1	0.11	+	9.25	0.146	1
negative regulation of DNA helicase activity (GO:1905775)	2	1	0.11	+	9.25	0.146	1
nuclear retention of unspliced pre-mRNA at the site of transcription (GO:0071048)	2	1	0.11	+	9.25	0.146	1
positive regulation of cortisol secretion (GO:0051464)	2	1	0.11	+	9.25	0.146	1
nuclear mRNA surveillance of spliceosomal pre-mRNA splicing (GO:0071030)	2	1	0.11	+	9.25	0.146	1
retrograde axonal transport of mitochondrion (GO:0098958)	2	1	0.11	+	9.25	0.146	1
negative regulation of vitamin D receptor signaling pathway (GO:0070563)	2	1	0.11	+	9.25	0.146	1
positive regulation of pigment cell differentiation (GO:0050942)	4	2	0.22	+	9.25	0.0343	1
protein-DNA complex remodeling (GO:0001120)	2	1	0.11	+	9.25	0.146	1
DNA-templated transcription open complex formation (GO:0001112)	2	1	0.11	+	9.25	0.146	1
positive regulation of calcium ion import across plasma membrane (GO:1905665)	2	1	0.11	+	9.25	0.146	1
positive regulation of DNA methylation (GO:1905643)	2	1	0.11	+	9.25	0.146	1
prolactin secretion (GO:0070459)	2	1	0.11	+	9.25	0.146	1
trimming of second mannose on A branch (GO:0036512)	2	1	0.11	+	9.25	0.146	1
trimming of first mannose on A branch (GO:0036511)	2	1	0.11	+	9.25	0.146	1
trimming of terminal mannose on B branch (GO:0036509)	2	1	0.11	+	9.25	0.146	1
protein K27-linked deubiquitination (GO:1990167)	2	1	0.11	+	9.25	0.146	1
eiF2alpha phosphorylation in response to endoplasmic reticulum stress (GO:0036492)	2	1	0.11	+	9.25	0.146	1
negative regulation of termination of RNA polymerase II transcription (GO:0120191)	2	1	0.11	+	9.25	0.146	1
positive regulation of translational initiation in response to stress (GO:0032058)	4	2	0.22	+	9.25	0.0343	1
negative regulation of histone H3-K36 methylation (GO:0000415)	2	1	0.11	+	9.25	0.146	1
stress-induced mitochondrial fusion (GO:1990046)	2	1	0.11	+	9.25	0.146	1
positive regulation of NK T cell proliferation (GO:0051142)	2	1	0.11	+	9.25	0.146	1
intestinal stem cell homeostasis (GO:0036335)	2	1	0.11	+	9.25	0.146	1
spliceosomal complex disassembly (GO:0000390)	2	1	0.11	+	9.25	0.146	1
generation of catalytic spliceosome for first transesterification step (GO:0000349)	2	1	0.11	+	9.25	0.146	1
glycine betaine biosynthetic process (GO:0031456)	2	1	0.11	+	9.25	0.146	1
glycine betaine metabolic process (GO:0031455)	2	1	0.11	+	9.25	0.146	1
nucleologenesis (GO:0017126)	2	1	0.11	+	9.25	0.146	1
positive regulation of telomerase catalytic core complex assembly (GO:1904884)	2	1	0.11	+	9.25	0.146	1
regulation of telomerase catalytic core complex assembly (GO:1904882)	2	1	0.11	+	9.25	0.146	1
positive regulation of glutamate receptor signaling pathway (GO:1900451)	2	1	0.11	+	9.25	0.146	1
positive regulation of prostaglandin biosynthetic process (GO:0031394)	2	1	0.11	+	9.25	0.146	1
positive regulation of eosinophil degranulation (GO:0043311)	2	1	0.11	+	9.25	0.146	1
regulation of eosinophil degranulation (GO:0043309)	2	1	0.11	+	9.25	0.146	1
response to tetrachloromethane (GO:1904772)	4	2	0.22	+	9.25	0.0343	1
positive regulation of AMPA glutamate receptor clustering (GO:1904719)	2	1	0.11	+	9.25	0.146	1
helper T cell diapedesis (GO:0035685)	2	1	0.11	+	9.25	0.146	1
helper T cell extravasation (GO:0035684)	2	1	0.11	+	9.25	0.146	1
negative regulation of lysosomal protein catabolic process (GO:1905166)	2	1	0.11	+	9.25	0.146	1
eye pigmentation (GO:0048069)	2	1	0.11	+	9.25	0.146	1
P granule organization (GO:0030719)	2	1	0.11	+	9.25	0.146	1
positive regulation of cardiolipin metabolic process (GO:1900210)	2	1	0.11	+	9.25	0.146	1
response to cholecystokinin (GO:0061847)	2	1	0.11	+	9.25	0.146	1
peptide modification (GO:0031179)	2	1	0.11	+	9.25	0.146	1
phosphatidylinositol 5-phosphate metabolic process (GO:1904562)	2	1	0.11	+	9.25	0.146	1
regulation of nodal signaling pathway involved in determination of lateral mesoderm left/right asymmetry (GO:1900175)	2	1	0.11	+	9.25	0.146	1
regulation of nodal signaling pathway involved in determination of left/right asymmetry (GO:1900145)	2	1	0.11	+	9.25	0.146	1
negative regulation of phospholipase A2 activity (GO:1900138)	2	1	0.11	+	9.25	0.146	1
purine deoxyribonucleoside monophosphate biosynthetic process (GO:0009171)	2	1	0.11	+	9.25	0.146	1
maintenance of rDNA (GO:0043007)	2	1	0.11	+	9.25	0.146	1
lipoate metabolic process (GO:0009106)	2	1	0.11	+	9.25	0.146	1
establishment of protein-containing complex localization to telomere (GO:0097695)	2	1	0.11	+	9.25	0.146	1
establishment of RNA localization to telomere (GO:0097694)	2	1	0.11	+	9.25	0.146	1
regulation of intestinal absorption (GO:1904478)	2	1	0.11	+	9.25	0.146	1
symbiont intracellular protein transport in host (GO:0030581)	2	1	0.11	+	9.25	0.146	1
autophagosome membrane docking (GO:0016240)	4	2	0.22	+	9.25	0.0343	1
hormone-mediated apoptotic signaling pathway (GO:0008628)	2	1	0.11	+	9.25	0.146	1
pyridoxine biosynthetic process (GO:0008615)	2	1	0.11	+	9.25	0.146	1
pyridoxine metabolic process (GO:0008614)	2	1	0.11	+	9.25	0.146	1
negative regulation of phosphatidylcholine metabolic process (GO:0150174)	2	1	0.11	+	9.25	0.146	1
regulation of protein localization to cell-cell junction (GO:0150106)	2	1	0.11	+	9.25	0.146	1
negative regulation of protein catabolic process in the vacuole (GO:1904351)	2	1	0.11	+	9.25	0.146	1
cellular stress response to acid chemical (GO:0097533)	2	1	0.11	+	9.25	0.146	1
stress response to acid chemical (GO:0097532)	2	1	0.11	+	9.25	0.146	1
cholesterol storage (GO:0010878)	2	1	0.11	+	9.25	0.146	1
early endosome to recycling endosome transport (GO:0061502)	2	1	0.11	+	9.25	0.146	1
sno(s)RNA catabolic process (GO:0016077)	2	1	0.11	+	9.25	0.146	1
prenylcysteine metabolic process (GO:0030329)	2	1	0.11	+	9.25	0.146	1
prenylcysteine catabolic process (GO:0030328)	2	1	0.11	+	9.25	0.146	1
negative regulation of inorganic anion transmembrane transport (GO:1903796)	2	1	0.11	+	9.25	0.146	1
induction by virus of host autophagy (GO:0039520)	2	1	0.11	+	9.25	0.146	1
positive regulation of pyruvate dehydrogenase activity (GO:1904184)	2	1	0.11	+	9.25	0.146	1
peptidyl-aspartic acid hydroxylation (GO:0042264)	2	1	0.11	+	9.25	0.146	1
response to antipsychotic drug (GO:0097332)	2	1	0.11	+	9.25	0.146	1
negative regulation of transcription by transcription factor localization (GO:0010621)	2	1	0.11	+	9.25	0.146	1
positive regulation of wound healing, spreading of epidermal cells (GO:1903691)	4	2	0.22	+	9.25	0.0343	1
positive regulation of Wnt protein secretion (GO:0061357)	2	1	0.11	+	9.25	0.146	1
regulation of Wnt protein secretion (GO:0061356)	2	1	0.11	+	9.25	0.146	1
inactivation of X chromosome by genetic imprinting (GO:0060819)	2	1	0.11	+	9.25	0.146	1
positive regulation of cholangiocyte proliferation (GO:1904056)	2	1	0.11	+	9.25	0.146	1
regulation of cholangiocyte proliferation (GO:1904054)	2	1	0.11	+	9.25	0.146	1
lysosomal membrane organization (GO:0097212)	2	1	0.11	+	9.25	0.146	1
positive regulation of eating behavior (GO:1904000)	2	1	0.11	+	9.25	0.146	1
negative regulation of exosomal secretion (GO:1903542)	2	1	0.11	+	9.25	0.146	1
response to anisomycin (GO:0072739)	2	1	0.11	+	9.25	0.146	1
cell-cell signaling involved in mammary gland development (GO:0060764)	2	1	0.11	+	9.25	0.146	1
response to dithiothreitol (GO:0072720)	2	1	0.11	+	9.25	0.146	1
response to actinomycin D (GO:0072716)	4	2	0.22	+	9.25	0.0343	1
negative regulation of endoribonuclease activity (GO:0060702)	2	1	0.11	+	9.25	0.146	1
negative regulation of ribonuclease activity (GO:0060701)	2	1	0.11	+	9.25	0.146	1
cholesterol esterification (GO:0034435)	4	2	0.22	+	9.25	0.0343	1
sterol esterification (GO:0034434)	4	2	0.22	+	9.25	0.0343	1
steroid esterification (GO:0034433)	4	2	0.22	+	9.25	0.0343	1
tRNA 3'-trailer cleavage, endonucleolytic (GO:0034414)	2	1	0.11	+	9.25	0.146	1
NMDA glutamate receptor clustering (GO:0097114)	2	1	0.11	+	9.25	0.146	1
response to glycoside (GO:1903416)	4	2	0.22	+	9.25	0.0343	1
fructose biosynthetic process (GO:0046370)	2	1	0.11	+	9.25	0.146	1
acetyl-CoA catabolic process (GO:0046356)	2	1	0.11	+	9.25	0.146	1
disaccharide biosynthetic process (GO:0046351)	2	1	0.11	+	9.25	0.146	1
negative regulation of muscle atrophy (GO:0014736)	2	1	0.11	+	9.25	0.146	1
mature conventional dendritic cell differentiation (GO:0097029)	2	1	0.11	+	9.25	0.146	1
negative regulation of dendritic cell cytokine production (GO:0002731)	2	1	0.11	+	9.25	0.146	1
positive regulation of adherens junction organization (GO:1903393)	2	1	0.11	+	9.25	0.146	1
regulation of homophilic cell adhesion (GO:1903385)	2	1	0.11	+	9.25	0.146	1
forebrain astrocyte development (GO:0021897)	2	1	0.11	+	9.25	0.146	1
forebrain astrocyte differentiation (GO:0021896)	2	1	0.11	+	9.25	0.146	1
establishment of synaptic specificity at neuromuscular junction (GO:0007529)	2	1	0.11	+	9.25	0.146	1
His-Purkinje system development (GO:0003164)	2	1	0.11	+	9.25	0.146	1
negative regulation of DNA-templated transcription, termination (GO:0060567)	2	1	0.11	+	9.25	0.146	1
propionyl-CoA metabolic process (GO:1902858)	2	1	0.11	+	9.25	0.146	1
negative regulation of glomerular filtration (GO:0003105)	2	1	0.11	+	9.25	0.146	1
proton-transporting V-type ATPase complex assembly (GO:0070070)	6	3	0.32	+	9.25	0.00895	1
receptor-mediated endocytosis of virus by host cell (GO:0019065)	7	3	0.38	+	7.93	0.0123	1
endocytosis involved in viral entry into host cell (GO:0075509)	7	3	0.38	+	7.93	0.0123	1
negative regulation of cholesterol biosynthetic process (GO:0045541)	5	2	0.27	+	7.4	0.0465	1
positive regulation of glutamate secretion (GO:0014049)	5	2	0.27	+	7.4	0.0465	1
optic cup morphogenesis involved in camera-type eye development (GO:0002072)	5	2	0.27	+	7.4	0.0465	1
cellular response to parathyroid hormone stimulus (GO:0071374)	5	2	0.27	+	7.4	0.0465	1
negative regulation of smoothened signaling pathway involved in dorsal/ventral neural tube patterning (GO:1901621)	5	2	0.27	+	7.4	0.0465	1
regulation of neutrophil apoptotic process (GO:0033029)	5	2	0.27	+	7.4	0.0465	1
maintenance of postsynaptic density structure (GO:0099562)	5	2	0.27	+	7.4	0.0465	1
negative regulation of cholesterol metabolic process (GO:0090206)	5	2	0.27	+	7.4	0.0465	1
negative regulation of sterol biosynthetic process (GO:0106119)	5	2	0.27	+	7.4	0.0465	1
regulation of glutamate receptor clustering (GO:0106104)	5	2	0.27	+	7.4	0.0465	1
regulation of pigment cell differentiation (GO:0050932)	5	2	0.27	+	7.4	0.0465	1
thrombin-activated receptor signaling pathway (GO:0070493)	5	2	0.27	+	7.4	0.0465	1
negative regulation of fat cell proliferation (GO:0070345)	5	2	0.27	+	7.4	0.0465	1
vacuolar proton-transporting V-type ATPase complex assembly (GO:0070072)	5	2	0.27	+	7.4	0.0465	1
vitamin B6 metabolic process (GO:0042816)	5	2	0.27	+	7.4	0.0465	1
regulation of AMPA glutamate receptor clustering (GO:1904717)	5	2	0.27	+	7.4	0.0465	1
protein lipoylation (GO:0009249)	5	2	0.27	+	7.4	0.0465	1
purine deoxyribonucleoside triphosphate catabolic process (GO:0009217)	5	2	0.27	+	7.4	0.0465	1
histone-threonine phosphorylation (GO:0035405)	5	2	0.27	+	7.4	0.0465	1
bundle of His cell-Purkinje myocyte adhesion involved in cell communication (GO:0086073)	5	2	0.27	+	7.4	0.0465	1
choline catabolic process (GO:0042426)	5	2	0.27	+	7.4	0.0465	1
regulation of serine C-palmitoyltransferase activity (GO:1904220)	5	2	0.27	+	7.4	0.0465	1
positive regulation of Rac protein signal transduction (GO:0035022)	5	2	0.27	+	7.4	0.0465	1
lymphatic endothelial cell differentiation (GO:0060836)	5	2	0.27	+	7.4	0.0465	1
regulation of membrane tubulation (GO:1903525)	5	2	0.27	+	7.4	0.0465	1
regulation of wound healing, spreading of epidermal cells (GO:1903689)	8	3	0.43	+	6.94	0.0163	1
erythrocyte maturation (GO:0043249)	11	4	0.59	+	6.73	0.00595	1
removal of superoxide radicals (GO:0019430)	9	3	0.49	+	6.17	0.0209	1
cell communication by electrical coupling involved in cardiac conduction (GO:0086064)	9	3	0.49	+	6.17	0.0209	1
production of siRNA involved in RNA interference (GO:0030422)	9	3	0.49	+	6.17	0.0209	1
response to oleic acid (GO:0034201)	6	2	0.32	+	6.17	0.0599	1
striatal medium spiny neuron differentiation (GO:0021773)	3	1	0.16	+	6.17	0.19	1
aldehyde biosynthetic process (GO:0046184)	6	2	0.32	+	6.17	0.0599	1
positive regulation of proteoglycan biosynthetic process (GO:1902730)	3	1	0.16	+	6.17	0.19	1
inosine metabolic process (GO:0046102)	3	1	0.16	+	6.17	0.19	1
negative regulation of transcription involved in G1/S transition of mitotic cell cycle (GO:0071930)	3	1	0.16	+	6.17	0.19	1
specification of animal organ position (GO:0010159)	3	1	0.16	+	6.17	0.19	1
regulation of melanocyte differentiation (GO:0045634)	3	1	0.16	+	6.17	0.19	1
negative regulation of T-helper 1 cell differentiation (GO:0045626)	3	1	0.16	+	6.17	0.19	1
negative regulation of mammary gland epithelial cell proliferation (GO:0033600)	3	1	0.16	+	6.17	0.19	1
zygotic specification of dorsal/ventral axis (GO:0007352)	3	1	0.16	+	6.17	0.19	1
pole plasm assembly (GO:0007315)	3	1	0.16	+	6.17	0.19	1
oocyte anterior/posterior axis specification (GO:0007314)	3	1	0.16	+	6.17	0.19	1
oocyte axis specification (GO:0007309)	3	1	0.16	+	6.17	0.19	1
oocyte construction (GO:0007308)	3	1	0.16	+	6.17	0.19	1
response to ammonium ion (GO:0060359)	3	1	0.16	+	6.17	0.19	1
dATP catabolic process (GO:0046061)	3	1	0.16	+	6.17	0.19	1
regulation of grooming behavior (GO:2000821)	3	1	0.16	+	6.17	0.19	1
dAMP metabolic process (GO:0046053)	3	1	0.16	+	6.17	0.19	1
regulation of termination of RNA polymerase II transcription, poly(A)-coupled (GO:2000804)	3	1	0.16	+	6.17	0.19	1
regulation of membrane hyperpolarization (GO:1902630)	3	1	0.16	+	6.17	0.19	1
purine nucleoside bisphosphate catabolic process (GO:0034034)	6	2	0.32	+	6.17	0.0599	1
ribonucleoside bisphosphate catabolic process (GO:0034031)	6	2	0.32	+	6.17	0.0599	1
malonyl-CoA metabolic process (GO:2001293)	3	1	0.16	+	6.17	0.19	1
positive regulation of unsaturated fatty acid biosynthetic process (GO:2001280)	3	1	0.16	+	6.17	0.19	1
citrulline biosynthetic process (GO:0019240)	3	1	0.16	+	6.17	0.19	1
regulation of eosinophil activation (GO:1902566)	3	1	0.16	+	6.17	0.19	1
regulation of dense core granule biogenesis (GO:2000705)	3	1	0.16	+	6.17	0.19	1
positive regulation of G2/MI transition of meiotic cell cycle (GO:0110032)	3	1	0.16	+	6.17	0.19	1
regulation of G2/MI transition of meiotic cell cycle (GO:0110030)	3	1	0.16	+	6.17	0.19	1
galactose catabolic process via UDP-galactose (GO:0033499)	3	1	0.16	+	6.17	0.19	1
Mullerian duct regression (GO:0001880)	3	1	0.16	+	6.17	0.19	1
positive regulation of dopamine receptor signaling pathway (GO:0060161)	3	1	0.16	+	6.17	0.19	1
mitotic centrosome separation (GO:0007100)	6	2	0.32	+	6.17	0.0599	1
positive regulation of activin receptor signaling pathway (GO:0032927)	6	2	0.32	+	6.17	0.0599	1
regulation of inward rectifier potassium channel activity (GO:1901979)	3	1	0.16	+	6.17	0.19	1
viral release from host cell (GO:0019076)	6	2	0.32	+	6.17	0.0599	1
DNA repair complex assembly (GO:0090735)	3	1	0.16	+	6.17	0.19	1
positive regulation of T-helper 1 cell cytokine production (GO:2000556)	3	1	0.16	+	6.17	0.19	1
regulation of T-helper 1 cell cytokine production (GO:2000554)	3	1	0.16	+	6.17	0.19	1
anatomical structure regression (GO:0060033)	6	2	0.32	+	6.17	0.0599	1
positive regulation of natural killer cell proliferation (GO:0032819)	6	2	0.32	+	6.17	0.0599	1
regulation of natural killer cell proliferation (GO:0032817)	6	2	0.32	+	6.17	0.0599	1
interleukin-9-mediated signaling pathway (GO:0038113)	6	2	0.32	+	6.17	0.0599	1
regulation of peptidyl-serine dephosphorylation (GO:1902308)	3	1	0.16	+	6.17	0.19	1
translation reinitiation (GO:0002188)	3	1	0.16	+	6.17	0.19	1
pericentric heterochromatin organization (GO:0140462)	3	1	0.16	+	6.17	0.19	1
apoptotic process involved in blood vessel morphogenesis (GO:1902262)	3	1	0.16	+	6.17	0.19	1
threonyl-tRNA aminoacylation (GO:0006435)	3	1	0.16	+	6.17	0.19	1
regulation of timing of anagen (GO:0051884)	3	1	0.16	+	6.17	0.19	1
histidyl-tRNA aminoacylation (GO:0006427)	3	1	0.16	+	6.17	0.19	1
arginyl-tRNA aminoacylation (GO:0006420)	3	1	0.16	+	6.17	0.19	1
osteoblast fate commitment (GO:0002051)	3	1	0.16	+	6.17	0.19	1
positive regulation of synapse structural plasticity (GO:0051835)	3	1	0.16	+	6.17	0.19	1
cellular response to cycloheximide (GO:0071409)	3	1	0.16	+	6.17	0.19	1
cellular response to oleic acid (GO:0071400)	3	1	0.16	+	6.17	0.19	1
NADPH oxidation (GO:0070995)	3	1	0.16	+	6.17	0.19	1
nuclear-transcribed mRNA catabolic process, no-go decay (GO:0070966)	3	1	0.16	+	6.17	0.19	1
regulation of acrosomal vesicle exocytosis (GO:2000367)	3	1	0.16	+	6.17	0.19	1
serine import into mitochondrion (GO:0140300)	3	1	0.16	+	6.17	0.19	1
interleukin-10 production (GO:0032613)	3	1	0.16	+	6.17	0.19	1
interleukin-1 production (GO:0032612)	6	2	0.32	+	6.17	0.0599	1
interferon-gamma production (GO:0032609)	6	2	0.32	+	6.17	0.0599	1
DNA methylation-dependent heterochromatin assembly (GO:0006346)	6	2	0.32	+	6.17	0.0599	1
regulation of timing of catagen (GO:0051794)	3	1	0.16	+	6.17	0.19	1
cellular response to interleukin-9 (GO:0071355)	6	2	0.32	+	6.17	0.0599	1
response to prolactin (GO:1990637)	3	1	0.16	+	6.17	0.19	1
positive regulation of NAD+ ADP-ribosyltransferase activity (GO:1901666)	3	1	0.16	+	6.17	0.19	1
regulation of NAD+ ADP-ribosyltransferase activity (GO:1901664)	3	1	0.16	+	6.17	0.19	1
positive thymic T cell selection (GO:0045059)	3	1	0.16	+	6.17	0.19	1
negative regulation of myeloid cell apoptotic process (GO:0033033)	6	2	0.32	+	6.17	0.0599	1
positive regulation of neutrophil apoptotic process (GO:0033031)	3	1	0.16	+	6.17	0.19	1
dehydroascorbic acid transport (GO:0070837)	3	1	0.16	+	6.17	0.19	1
caveola assembly (GO:0070836)	3	1	0.16	+	6.17	0.19	1
negative regulation of Rho-dependent protein serine/threonine kinase activity (GO:2000299)	3	1	0.16	+	6.17	0.19	1
regulation of Fas signaling pathway (GO:1902044)	3	1	0.16	+	6.17	0.19	1
positive regulation of hematopoietic stem cell proliferation (GO:1902035)	6	2	0.32	+	6.17	0.0599	1
protein carboxylation (GO:0018214)	3	1	0.16	+	6.17	0.19	1
cellular response to ammonium ion (GO:0071242)	3	1	0.16	+	6.17	0.19	1
negative regulation of adenylate cyclase-activating adrenergic receptor signaling pathway involved in heart process (GO:0140199)	3	1	0.16	+	6.17	0.19	1
regulation of adenylate cyclase-activating adrenergic receptor signaling pathway involved in heart process (GO:0140192)	3	1	0.16	+	6.17	0.19	1
positive regulation of peptidyl-cysteine S-nitrosylation (GO:2000170)	3	1	0.16	+	6.17	0.19	1
regulation of hair follicle maturation (GO:0048819)	6	2	0.32	+	6.17	0.0599	1
positive regulation of hair follicle maturation (GO:0048818)	3	1	0.16	+	6.17	0.19	1
peptidyl-aspartic acid modification (GO:0018197)	3	1	0.16	+	6.17	0.19	1
presynaptic dense core vesicle exocytosis (GO:0099525)	3	1	0.16	+	6.17	0.19	1
positive regulation of neurotransmitter uptake (GO:0051582)	3	1	0.16	+	6.17	0.19	1
regulation of arginine metabolic process (GO:0000821)	3	1	0.16	+	6.17	0.19	1
ferredoxin metabolic process (GO:0006124)	3	1	0.16	+	6.17	0.19	1
fumarate metabolic process (GO:0006106)	3	1	0.16	+	6.17	0.19	1
keratinocyte migration (GO:0051546)	3	1	0.16	+	6.17	0.19	1
negative regulation of glucocorticoid biosynthetic process (GO:0031947)	3	1	0.16	+	6.17	0.19	1
negative regulation of glucocorticoid metabolic process (GO:0031944)	3	1	0.16	+	6.17	0.19	1
proteasome regulatory particle assembly (GO:0070682)	3	1	0.16	+	6.17	0.19	1
positive regulation of histone H4 acetylation (GO:0090240)	6	2	0.32	+	6.17	0.0599	1
regulation of mast cell proliferation (GO:0070666)	3	1	0.16	+	6.17	0.19	1
fibroblast apoptotic process (GO:0044346)	3	1	0.16	+	6.17	0.19	1
protein K6-linked deubiquitination (GO:0044313)	3	1	0.16	+	6.17	0.19	1
UDP-glucuronate biosynthetic process (GO:0006065)	3	1	0.16	+	6.17	0.19	1
hexitol metabolic process (GO:0006059)	3	1	0.16	+	6.17	0.19	1
DNA recombinase assembly (GO:0000730)	3	1	0.16	+	6.17	0.19	1
regulation of cortisol secretion (GO:0051462)	3	1	0.16	+	6.17	0.19	1
Golgi disassembly (GO:0090166)	6	2	0.32	+	6.17	0.0599	1
sensory perception of touch (GO:0050975)	3	1	0.16	+	6.17	0.19	1
aminoacyl-tRNA metabolism involved in translational fidelity (GO:0106074)	12	4	0.65	+	6.17	0.00762	1
positive regulation of adenylate cyclase-activating G protein-coupled receptor signaling pathway (GO:0106071)	3	1	0.16	+	6.17	0.19	1
negative regulation of synaptic transmission, GABAergic (GO:0032229)	3	1	0.16	+	6.17	0.19	1
regulation of plasma membrane repair (GO:1905684)	3	1	0.16	+	6.17	0.19	1
post-embryonic camera-type eye morphogenesis (GO:0048597)	3	1	0.16	+	6.17	0.19	1
negative regulation of steroid hormone biosynthetic process (GO:0090032)	3	1	0.16	+	6.17	0.19	1
trimming of terminal mannose on C branch (GO:0036510)	3	1	0.16	+	6.17	0.19	1
protein K33-linked deubiquitination (GO:1990168)	3	1	0.16	+	6.17	0.19	1
cerebellar neuron development (GO:0098749)	3	1	0.16	+	6.17	0.19	1
regulation of synaptic vesicle fusion to presynaptic active zone membrane (GO:0031630)	6	2	0.32	+	6.17	0.0599	1
Harderian gland development (GO:0070384)	3	1	0.16	+	6.17	0.19	1
regulation of translation initiation in response to endoplasmic reticulum stress (GO:0036491)	3	1	0.16	+	6.17	0.19	1
regulation of fat cell proliferation (GO:0070344)	6	2	0.32	+	6.17	0.0599	1
lens fiber cell morphogenesis (GO:0070309)	3	1	0.16	+	6.17	0.19	1
COPI-coated vesicle budding (GO:0035964)	6	2	0.32	+	6.17	0.0599	1
maintenance of DNA repeat elements (GO:0043570)	6	2	0.32	+	6.17	0.0599	1
negative regulation of DNA duplex unwinding (GO:1905463)	3	1	0.16	+	6.17	0.19	1
regulation of NK T cell proliferation (GO:0051140)	3	1	0.16	+	6.17	0.19	1
pericentric heterochromatin assembly (GO:0031508)	3	1	0.16	+	6.17	0.19	1
endosomal lumen acidification (GO:0048388)	3	1	0.16	+	6.17	0.19	1
negative regulation of activation-induced cell death of T cells (GO:0070236)	3	1	0.16	+	6.17	0.19	1
regulation of activation-induced cell death of T cells (GO:0070235)	3	1	0.16	+	6.17	0.19	1
neuronal dense core vesicle exocytosis (GO:0099011)	3	1	0.16	+	6.17	0.19	1
exit from host cell (GO:0035891)	6	2	0.32	+	6.17	0.0599	1
exit from host (GO:0035890)	6	2	0.32	+	6.17	0.0599	1
response to flavonoid (GO:1905395)	3	1	0.16	+	6.17	0.19	1
peptidyl-glutamic acid carboxylation (GO:0017187)	3	1	0.16	+	6.17	0.19	1
response to methotrexate (GO:0031427)	3	1	0.16	+	6.17	0.19	1
response to hydrogen sulfide (GO:1904880)	3	1	0.16	+	6.17	0.19	1
COPI coating of Golgi vesicle (GO:0048205)	6	2	0.32	+	6.17	0.0599	1
Golgi transport vesicle coating (GO:0048200)	6	2	0.32	+	6.17	0.0599	1
endonucleolytic cleavage involved in tRNA processing (GO:1905267)	3	1	0.16	+	6.17	0.19	1
negative regulation of aspartic-type peptidase activity (GO:1905246)	3	1	0.16	+	6.17	0.19	1
respiratory chain complex III assembly (GO:0017062)	6	2	0.32	+	6.17	0.0599	1
ubiquitin-dependent endocytosis (GO:0070086)	3	1	0.16	+	6.17	0.19	1
nucleolar large rRNA transcription by RNA polymerase I (GO:0042790)	3	1	0.16	+	6.17	0.19	1
positive regulation of developmental pigmentation (GO:0048087)	6	2	0.32	+	6.17	0.0599	1
tRNA 3'-trailer cleavage (GO:0042779)	3	1	0.16	+	6.17	0.19	1
regulation of termination of RNA polymerase II transcription (GO:1904594)	3	1	0.16	+	6.17	0.19	1
protein targeting to lysosome involved in chaperone-mediated autophagy (GO:0061740)	3	1	0.16	+	6.17	0.19	1
late endosomal microautophagy (GO:0061738)	3	1	0.16	+	6.17	0.19	1
purine nucleoside triphosphate catabolic process (GO:0009146)	6	2	0.32	+	6.17	0.0599	1
ketone body biosynthetic process (GO:0046951)	6	2	0.32	+	6.17	0.0599	1
glutamate receptor clustering (GO:0097688)	3	1	0.16	+	6.17	0.19	1
double-strand break repair via alternative nonhomologous end joining (GO:0097681)	3	1	0.16	+	6.17	0.19	1
positive regulation of heparan sulfate proteoglycan biosynthetic process (GO:0010909)	3	1	0.16	+	6.17	0.19	1
regulation of heparan sulfate proteoglycan biosynthetic process (GO:0010908)	3	1	0.16	+	6.17	0.19	1
cardiac muscle cell-cardiac muscle cell adhesion (GO:0086042)	6	2	0.32	+	6.17	0.0599	1
cellular response to forskolin (GO:1904322)	6	2	0.32	+	6.17	0.0599	1
response to forskolin (GO:1904321)	6	2	0.32	+	6.17	0.0599	1
positive regulation of neuroinflammatory response (GO:0150078)	3	1	0.16	+	6.17	0.19	1
water-soluble vitamin biosynthetic process (GO:0042364)	6	2	0.32	+	6.17	0.0599	1
snRNA catabolic process (GO:0016076)	3	1	0.16	+	6.17	0.19	1
prenylated protein catabolic process (GO:0030327)	3	1	0.16	+	6.17	0.19	1
negative regulation of MDA-5 signaling pathway (GO:0039534)	3	1	0.16	+	6.17	0.19	1
modulation by virus of host autophagy (GO:0039519)	3	1	0.16	+	6.17	0.19	1
positive regulation of centriole elongation (GO:1903724)	3	1	0.16	+	6.17	0.19	1
regulation of pyruvate dehydrogenase activity (GO:1904182)	3	1	0.16	+	6.17	0.19	1
positive regulation of retrograde protein transport, ER to cytosol (GO:1904154)	3	1	0.16	+	6.17	0.19	1
maternal determination of anterior/posterior axis, embryo (GO:0008358)	3	1	0.16	+	6.17	0.19	1
positive regulation of mitochondrial fusion (GO:0010636)	3	1	0.16	+	6.17	0.19	1
heparan sulfate proteoglycan catabolic process (GO:0030200)	3	1	0.16	+	6.17	0.19	1
negative regulation of protein tyrosine phosphatase activity (GO:1903614)	3	1	0.16	+	6.17	0.19	1
regulation of autophagic cell death (GO:1904092)	3	1	0.16	+	6.17	0.19	1
mitochondrial respiratory chain complex III assembly (GO:0034551)	6	2	0.32	+	6.17	0.0599	1
regulation of locomotor rhythm (GO:1904059)	3	1	0.16	+	6.17	0.19	1
strand invasion (GO:0042148)	3	1	0.16	+	6.17	0.19	1
proteoglycan catabolic process (GO:0030167)	3	1	0.16	+	6.17	0.19	1
tRNA threonylcarbamoyladenosine modification (GO:0002949)	3	1	0.16	+	6.17	0.19	1
cellular response to staurosporine (GO:0072734)	3	1	0.16	+	6.17	0.19	1
response to staurosporine (GO:0072733)	3	1	0.16	+	6.17	0.19	1
negative regulation of extracellular matrix constituent secretion (GO:0003332)	3	1	0.16	+	6.17	0.19	1
cellular response to cisplatin (GO:0072719)	6	2	0.32	+	6.17	0.0599	1
cellular response to actinomycin D (GO:0072717)	3	1	0.16	+	6.17	0.19	1
dihydrofolate metabolic process (GO:0046452)	3	1	0.16	+	6.17	0.19	1
physiological cardiac muscle hypertrophy (GO:0003301)	3	1	0.16	+	6.17	0.19	1
chorionic trophoblast cell differentiation (GO:0060718)	3	1	0.16	+	6.17	0.19	1
response to carbon monoxide (GO:0034465)	3	1	0.16	+	6.17	0.19	1
actin modification (GO:0030047)	3	1	0.16	+	6.17	0.19	1
AMPA glutamate receptor clustering (GO:0097113)	3	1	0.16	+	6.17	0.19	1
fungiform papilla formation (GO:0061198)	3	1	0.16	+	6.17	0.19	1
choline metabolic process (GO:0019695)	6	2	0.32	+	6.17	0.0599	1
physiological muscle hypertrophy (GO:0003298)	3	1	0.16	+	6.17	0.19	1
epithelial cell morphogenesis involved in placental branching (GO:0060672)	3	1	0.16	+	6.17	0.19	1
epithelial cell differentiation involved in embryonic placenta development (GO:0060671)	3	1	0.16	+	6.17	0.19	1
negative regulation of aspartic-type endopeptidase activity involved in amyloid precursor protein catabolic process (GO:1902960)	3	1	0.16	+	6.17	0.19	1
regulation of muscle atrophy (GO:0014735)	3	1	0.16	+	6.17	0.19	1
nucleoside bisphosphate catabolic process (GO:0033869)	6	2	0.32	+	6.17	0.0599	1
cell growth involved in cardiac muscle cell development (GO:0061049)	3	1	0.16	+	6.17	0.19	1
positive regulation of endoplasmic reticulum tubular network organization (GO:1903373)	3	1	0.16	+	6.17	0.19	1
positive regulation of glomerular filtration (GO:0003104)	3	1	0.16	+	6.17	0.19	1
cellular response to leucine (GO:0071233)	10	3	0.54	+	5.55	0.0261	1
phosphatidylserine acyl-chain remodeling (GO:0036150)	10	3	0.54	+	5.55	0.0261	1
mitochondrial ATP synthesis coupled proton transport (GO:0042776)	10	3	0.54	+	5.55	0.0261	1
regulation of T-helper 1 cell differentiation (GO:0045625)	7	2	0.38	+	5.28	0.0744	1
growth hormone receptor signaling pathway via JAK-STAT (GO:0060397)	7	2	0.38	+	5.28	0.0744	1
tetrahydrobiopterin biosynthetic process (GO:0006729)	7	2	0.38	+	5.28	0.0744	1
inner cell mass cell proliferation (GO:0001833)	14	4	0.76	+	5.28	0.0118	1
interleukin-2-mediated signaling pathway (GO:0038110)	7	2	0.38	+	5.28	0.0744	1
regulation of glutamate secretion (GO:0014048)	7	2	0.38	+	5.28	0.0744	1
regulation of smoothened signaling pathway involved in dorsal/ventral neural tube patterning (GO:1901620)	7	2	0.38	+	5.28	0.0744	1
'de novo' pyrimidine nucleobase biosynthetic process (GO:0006207)	7	2	0.38	+	5.28	0.0744	1
mitochondrial electron transport, cytochrome c to oxygen (GO:0006123)	14	4	0.76	+	5.28	0.0118	1
malate metabolic process (GO:0006108)	7	2	0.38	+	5.28	0.0744	1
response to interleukin-9 (GO:0071104)	7	2	0.38	+	5.28	0.0744	1
maintenance of postsynaptic specialization structure (GO:0098880)	7	2	0.38	+	5.28	0.0744	1
establishment of protein localization to telomere (GO:0070200)	7	2	0.38	+	5.28	0.0744	1
response to UV-A (GO:0070141)	7	2	0.38	+	5.28	0.0744	1
ATP synthesis coupled proton transport (GO:0015986)	14	4	0.76	+	5.28	0.0118	1
energy coupled proton transport, down electrochemical gradient (GO:0015985)	14	4	0.76	+	5.28	0.0118	1
purine deoxyribonucleoside triphosphate metabolic process (GO:0009215)	7	2	0.38	+	5.28	0.0744	1
purine deoxyribonucleotide catabolic process (GO:0009155)	7	2	0.38	+	5.28	0.0744	1
peroxisome proliferator activated receptor signaling pathway (GO:0035357)	7	2	0.38	+	5.28	0.0744	1
glyoxylate metabolic process (GO:0046487)	7	2	0.38	+	5.28	0.0744	1
aerobic electron transport chain (GO:0019646)	14	4	0.76	+	5.28	0.0118	1
phosphatidylserine metabolic process (GO:0006658)	22	6	1.19	+	5.04	0.00255	1
natural killer cell differentiation (GO:0001779)	11	3	0.59	+	5.04	0.032	1
mitotic nuclear envelope disassembly (GO:0007077)	11	3	0.59	+	5.04	0.032	1
cellular response to superoxide (GO:0071451)	11	3	0.59	+	5.04	0.032	1
cellular response to oxygen radical (GO:0071450)	11	3	0.59	+	5.04	0.032	1
cellular response to interleukin-15 (GO:0071350)	11	3	0.59	+	5.04	0.032	1
hepatocyte differentiation (GO:0070365)	11	3	0.59	+	5.04	0.032	1
establishment of protein localization to chromosome (GO:0070199)	11	3	0.59	+	5.04	0.032	1
interleukin-15-mediated signaling pathway (GO:0035723)	11	3	0.59	+	5.04	0.032	1
phosphatidylethanolamine acyl-chain remodeling (GO:0036152)	11	3	0.59	+	5.04	0.032	1
protein localization to endosome (GO:0036010)	11	3	0.59	+	5.04	0.032	1
primary miRNA processing (GO:0031053)	11	3	0.59	+	5.04	0.032	1
purine deoxyribonucleotide metabolic process (GO:0009151)	11	3	0.59	+	5.04	0.032	1
regulation of plasma membrane organization (GO:1903729)	11	3	0.59	+	5.04	0.032	1
response to UV-C (GO:0010225)	15	4	0.81	+	4.93	0.0144	1
mitochondrial fusion (GO:0008053)	15	4	0.81	+	4.93	0.0144	1
4-hydroxyproline metabolic process (GO:0019471)	4	1	0.22	+	4.62	0.231	1
4-hydroxyproline catabolic process (GO:0019470)	4	1	0.22	+	4.62	0.231	1
regulation of glomerular filtration (GO:0003093)	8	2	0.43	+	4.62	0.09	1
positive regulation of AMPA receptor activity (GO:2000969)	4	1	0.22	+	4.62	0.231	1
negative regulation of megakaryocyte differentiation (GO:0045653)	4	1	0.22	+	4.62	0.231	1
negative regulation of T-helper 2 cell differentiation (GO:0045629)	4	1	0.22	+	4.62	0.231	1
positive regulation of T-helper 1 cell differentiation (GO:0045627)	4	1	0.22	+	4.62	0.231	1
pentose biosynthetic process (GO:0019322)	4	1	0.22	+	4.62	0.231	1
positive regulation of corticosteroid hormone secretion (GO:2000848)	4	1	0.22	+	4.62	0.231	1
dATP metabolic process (GO:0046060)	4	1	0.22	+	4.62	0.231	1
regulation of nucleotide-excision repair (GO:2000819)	4	1	0.22	+	4.62	0.231	1
negative regulation of adenylate cyclase-activating adrenergic receptor signaling pathway (GO:0071878)	4	1	0.22	+	4.62	0.231	1
regulation of phosphatidylcholine biosynthetic process (GO:2001245)	4	1	0.22	+	4.62	0.231	1
negative regulation of extracellular matrix organization (GO:1903054)	8	2	0.43	+	4.62	0.09	1
neuron-neuron synaptic transmission (GO:0007270)	4	1	0.22	+	4.62	0.231	1
neuronal action potential propagation (GO:0019227)	4	1	0.22	+	4.62	0.231	1
protoporphyrinogen IX biosynthetic process (GO:0006782)	8	2	0.43	+	4.62	0.09	1
response to yeast (GO:0001878)	4	1	0.22	+	4.62	0.231	1
blastocyst growth (GO:0001832)	20	5	1.08	+	4.62	0.0079	1
positive regulation of transforming growth factor beta1 production (GO:0032914)	4	1	0.22	+	4.62	0.231	1
positive regulation of meiotic cell cycle phase transition (GO:1901995)	4	1	0.22	+	4.62	0.231	1
connective tissue replacement involved in inflammatory response wound healing (GO:0002248)	4	1	0.22	+	4.62	0.231	1
establishment of lymphocyte polarity (GO:0001767)	4	1	0.22	+	4.62	0.231	1
plasma membrane raft assembly (GO:0044854)	4	1	0.22	+	4.62	0.231	1
regulation of DNA endoreduplication (GO:0032875)	4	1	0.22	+	4.62	0.231	1
ceramide 1-phosphate transport (GO:1902389)	4	1	0.22	+	4.62	0.231	1
neurofilament cytoskeleton organization (GO:0060052)	4	1	0.22	+	4.62	0.231	1
positive regulation of protein glycosylation (GO:0060050)	8	2	0.43	+	4.62	0.09	1
isoleucine catabolic process (GO:0006550)	4	1	0.22	+	4.62	0.231	1
glycine biosynthetic process (GO:0006545)	4	1	0.22	+	4.62	0.231	1
desmosome assembly (GO:0002159)	4	1	0.22	+	4.62	0.231	1
negative regulation of CREB transcription factor activity (GO:0032792)	4	1	0.22	+	4.62	0.231	1
pre-replicative complex assembly involved in cell cycle DNA replication (GO:1902299)	8	2	0.43	+	4.62	0.09	1
cellular response to UV-A (GO:0071492)	4	1	0.22	+	4.62	0.231	1
ketone body metabolic process (GO:1902224)	8	2	0.43	+	4.62	0.09	1
regulation of gamma-aminobutyric acid secretion (GO:0014052)	4	1	0.22	+	4.62	0.231	1
cellular response to acidic pH (GO:0071468)	8	2	0.43	+	4.62	0.09	1
xylulose metabolic process (GO:0005997)	4	1	0.22	+	4.62	0.231	1
fatty acid alpha-oxidation (GO:0001561)	8	2	0.43	+	4.62	0.09	1
interleukin-1 beta production (GO:0032611)	4	1	0.22	+	4.62	0.231	1
viral penetration into host nucleus (GO:0075732)	4	1	0.22	+	4.62	0.231	1
negative regulation of hair follicle development (GO:0051799)	4	1	0.22	+	4.62	0.231	1
cellular response to interleukin-2 (GO:0071352)	8	2	0.43	+	4.62	0.09	1
regulation of postsynaptic membrane organization (GO:1901626)	4	1	0.22	+	4.62	0.231	1
regulation of Rho-dependent protein serine/threonine kinase activity (GO:2000298)	4	1	0.22	+	4.62	0.231	1
oxidative stress-induced premature senescence (GO:0090403)	4	1	0.22	+	4.62	0.231	1
DNA unwinding involved in DNA replication (GO:0006268)	16	4	0.87	+	4.62	0.0172	1
pre-replicative complex assembly involved in nuclear cell cycle DNA replication (GO:0006267)	8	2	0.43	+	4.62	0.09	1
pointed-end actin filament capping (GO:0051694)	4	1	0.22	+	4.62	0.231	1
protein targeting to vacuole involved in autophagy (GO:0071211)	4	1	0.22	+	4.62	0.231	1
D-aspartate import across plasma membrane (GO:0070779)	4	1	0.22	+	4.62	0.231	1
D-aspartate transport (GO:0070777)	4	1	0.22	+	4.62	0.231	1
trans-synaptic signaling by endocannabinoid (GO:0099542)	4	1	0.22	+	4.62	0.231	1
trans-synaptic signaling by lipid (GO:0099541)	4	1	0.22	+	4.62	0.231	1
regulation of mismatch repair (GO:0032423)	4	1	0.22	+	4.62	0.231	1
positive regulation of sodium:proton antiporter activity (GO:0032417)	4	1	0.22	+	4.62	0.231	1
purine ribonucleoside salvage (GO:0006166)	4	1	0.22	+	4.62	0.231	1
histone H3-S10 phosphorylation (GO:0043987)	4	1	0.22	+	4.62	0.231	1
establishment of protein localization to chromatin (GO:0071169)	4	1	0.22	+	4.62	0.231	1
mitochondrial electron transport, succinate to ubiquinone (GO:0006121)	4	1	0.22	+	4.62	0.231	1
NADH oxidation (GO:0006116)	4	1	0.22	+	4.62	0.231	1
positive regulation of keratinocyte migration (GO:0051549)	8	2	0.43	+	4.62	0.09	1
negative regulation of transcription from RNA polymerase II promoter in response to endoplasmic reticulum stress (GO:1990441)	4	1	0.22	+	4.62	0.231	1
response to parathyroid hormone (GO:0071107)	8	2	0.43	+	4.62	0.09	1
regulation of glucocorticoid metabolic process (GO:0031943)	8	2	0.43	+	4.62	0.09	1
regulation of mitochondrial DNA replication (GO:0090296)	4	1	0.22	+	4.62	0.231	1
positive regulation of arachidonic acid secretion (GO:0090238)	4	1	0.22	+	4.62	0.231	1
glucose import in response to insulin stimulus (GO:0044381)	4	1	0.22	+	4.62	0.231	1
regulation of centromeric sister chromatid cohesion (GO:0070602)	4	1	0.22	+	4.62	0.231	1
protein K27-linked ubiquitination (GO:0044314)	4	1	0.22	+	4.62	0.231	1
pyrimidine dimer repair by nucleotide-excision repair (GO:0000720)	4	1	0.22	+	4.62	0.231	1
CUT metabolic process (GO:0071043)	4	1	0.22	+	4.62	0.231	1
CUT catabolic process (GO:0071034)	4	1	0.22	+	4.62	0.231	1
fructose 6-phosphate metabolic process (GO:0006002)	8	2	0.43	+	4.62	0.09	1
peripheral nervous system myelin maintenance (GO:0032287)	8	2	0.43	+	4.62	0.09	1
diapedesis (GO:0050904)	4	1	0.22	+	4.62	0.231	1
action potential propagation (GO:0098870)	4	1	0.22	+	4.62	0.231	1
regulation of calcium ion import across plasma membrane (GO:1905664)	4	1	0.22	+	4.62	0.231	1
white fat cell differentiation (GO:0050872)	8	2	0.43	+	4.62	0.09	1
histone H3-K14 acetylation (GO:0044154)	8	2	0.43	+	4.62	0.09	1
centrosome separation (GO:0051299)	8	2	0.43	+	4.62	0.09	1
positive regulation of lipopolysaccharide-mediated signaling pathway (GO:0031666)	4	1	0.22	+	4.62	0.231	1
keratinocyte proliferation (GO:0043616)	8	2	0.43	+	4.62	0.09	1
glucose import across plasma membrane (GO:0098708)	4	1	0.22	+	4.62	0.231	1
neuron death in response to oxidative stress (GO:0036475)	4	1	0.22	+	4.62	0.231	1
negative regulation of translational initiation in response to stress (GO:0032057)	4	1	0.22	+	4.62	0.231	1
regulation of synaptic vesicle cycle (GO:0098693)	8	2	0.43	+	4.62	0.09	1
regulation of inositol 1,4,5-trisphosphate-sensitive calcium-release channel activity (GO:0031585)	4	1	0.22	+	4.62	0.231	1
retrograde neuronal dense core vesicle transport (GO:1990049)	4	1	0.22	+	4.62	0.231	1
anterograde neuronal dense core vesicle transport (GO:1990048)	4	1	0.22	+	4.62	0.231	1
negative regulation of relaxation of muscle (GO:1901078)	4	1	0.22	+	4.62	0.231	1
positive regulation of NK T cell activation (GO:0051135)	4	1	0.22	+	4.62	0.231	1
regulation of DNA-templated transcription, termination (GO:0031554)	4	1	0.22	+	4.62	0.231	1
histone H3-K27 trimethylation (GO:0098532)	4	1	0.22	+	4.62	0.231	1
snRNA transport (GO:0051030)	4	1	0.22	+	4.62	0.231	1
positive regulation of amyloid precursor protein biosynthetic process (GO:0042986)	4	1	0.22	+	4.62	0.231	1
response to L-glutamine (GO:1904844)	4	1	0.22	+	4.62	0.231	1
regulation of glutamate receptor signaling pathway (GO:1900449)	4	1	0.22	+	4.62	0.231	1
interleukin-4-mediated signaling pathway (GO:0035771)	4	1	0.22	+	4.62	0.231	1
positive regulation of long-term neuronal synaptic plasticity (GO:0048170)	4	1	0.22	+	4.62	0.231	1
phosphatidylglycerol acyl-chain remodeling (GO:0036148)	8	2	0.43	+	4.62	0.09	1
positive regulation of cytoplasmic translational initiation (GO:1904690)	4	1	0.22	+	4.62	0.231	1
osteoclast development (GO:0036035)	4	1	0.22	+	4.62	0.231	1
regulation of cardiolipin metabolic process (GO:1900208)	4	1	0.22	+	4.62	0.231	1
protein K29-linked deubiquitination (GO:0035523)	4	1	0.22	+	4.62	0.231	1
protein K29-linked ubiquitination (GO:0035519)	4	1	0.22	+	4.62	0.231	1
long-chain fatty acid import across plasma membrane (GO:0015911)	4	1	0.22	+	4.62	0.231	1
deoxyribonucleoside triphosphate catabolic process (GO:0009204)	8	2	0.43	+	4.62	0.09	1
mitigation of host defenses by symbiont (GO:0030682)	4	1	0.22	+	4.62	0.231	1
connective tissue replacement (GO:0097709)	4	1	0.22	+	4.62	0.231	1
regulation of nodal signaling pathway (GO:1900107)	4	1	0.22	+	4.62	0.231	1
extracellular matrix-cell signaling (GO:0035426)	4	1	0.22	+	4.62	0.231	1
purine deoxyribonucleoside monophosphate metabolic process (GO:0009170)	4	1	0.22	+	4.62	0.231	1
purine deoxyribonucleotide biosynthetic process (GO:0009153)	4	1	0.22	+	4.62	0.231	1
ketone body catabolic process (GO:0046952)	4	1	0.22	+	4.62	0.231	1
cellular ketone body metabolic process (GO:0046950)	8	2	0.43	+	4.62	0.09	1
regulation of translational initiation by eIF2 alpha phosphorylation (GO:0010998)	4	1	0.22	+	4.62	0.231	1
amylin receptor signaling pathway (GO:0097647)	4	1	0.22	+	4.62	0.231	1
positive regulation of mitochondrial membrane potential (GO:0010918)	8	2	0.43	+	4.62	0.09	1
regulation of eating behavior (GO:1903998)	4	1	0.22	+	4.62	0.231	1
oligosaccharide transport (GO:0015772)	4	1	0.22	+	4.62	0.231	1
sucrose transport (GO:0015770)	4	1	0.22	+	4.62	0.231	1
disaccharide transport (GO:0015766)	4	1	0.22	+	4.62	0.231	1
bundle of His cell to Purkinje myocyte communication (GO:0086069)	8	2	0.43	+	4.62	0.09	1
response to cycloheximide (GO:0046898)	4	1	0.22	+	4.62	0.231	1
mast cell migration (GO:0097531)	4	1	0.22	+	4.62	0.231	1
regulation of synaptic vesicle priming (GO:0010807)	8	2	0.43	+	4.62	0.09	1
ectopic germ cell programmed cell death (GO:0035234)	4	1	0.22	+	4.62	0.231	1
hypoxia-inducible factor-1alpha signaling pathway (GO:0097411)	4	1	0.22	+	4.62	0.231	1
embryonic camera-type eye formation (GO:0060900)	8	2	0.43	+	4.62	0.09	1
DNA protection (GO:0042262)	4	1	0.22	+	4.62	0.231	1
negative regulation of retrograde protein transport, ER to cytosol (GO:1904153)	8	2	0.43	+	4.62	0.09	1
neutrophil clearance (GO:0097350)	4	1	0.22	+	4.62	0.231	1
negative regulation of wound healing, spreading of epidermal cells (GO:1903690)	4	1	0.22	+	4.62	0.231	1
retinal blood vessel morphogenesis (GO:0061304)	4	1	0.22	+	4.62	0.231	1
positive regulation of sensory perception of pain (GO:1904058)	4	1	0.22	+	4.62	0.231	1
mitochondrial respirasome assembly (GO:0097250)	4	1	0.22	+	4.62	0.231	1
response to Thyroglobulin triiodothyronine (GO:1904016)	4	1	0.22	+	4.62	0.231	1
positive regulation of glycoprotein biosynthetic process (GO:0010560)	16	4	0.87	+	4.62	0.0172	1
regulation of acetyl-CoA biosynthetic process from pyruvate (GO:0010510)	8	2	0.43	+	4.62	0.09	1
cellular response to camptothecin (GO:0072757)	4	1	0.22	+	4.62	0.231	1
regulation of extracellular matrix constituent secretion (GO:0003330)	4	1	0.22	+	4.62	0.231	1
chorion development (GO:0060717)	4	1	0.22	+	4.62	0.231	1
circadian regulation of translation (GO:0097167)	4	1	0.22	+	4.62	0.231	1
myoblast migration involved in skeletal muscle regeneration (GO:0014839)	4	1	0.22	+	4.62	0.231	1
negative regulation of T-helper 1 type immune response (GO:0002826)	4	1	0.22	+	4.62	0.231	1
regulation of chondrocyte development (GO:0061181)	4	1	0.22	+	4.62	0.231	1
alkanesulfonate metabolic process (GO:0019694)	4	1	0.22	+	4.62	0.231	1
T cell extravasation (GO:0072683)	4	1	0.22	+	4.62	0.231	1
regulation of endoribonuclease activity (GO:0060699)	4	1	0.22	+	4.62	0.231	1
UDP-glucuronate metabolic process (GO:0046398)	4	1	0.22	+	4.62	0.231	1
positive regulation of muscle adaptation (GO:0014744)	4	1	0.22	+	4.62	0.231	1
protein K6-linked ubiquitination (GO:0085020)	8	2	0.43	+	4.62	0.09	1
taurine metabolic process (GO:0019530)	4	1	0.22	+	4.62	0.231	1
negative regulation of intracellular estrogen receptor signaling pathway (GO:0033147)	12	3	0.65	+	4.62	0.0385	1
response to interleukin-15 (GO:0070672)	12	3	0.65	+	4.62	0.0385	1
regulation of phospholipid biosynthetic process (GO:0071071)	12	3	0.65	+	4.62	0.0385	1
proton-transporting two-sector ATPase complex assembly (GO:0070071)	12	3	0.65	+	4.62	0.0385	1
pre-miRNA processing (GO:0031054)	12	3	0.65	+	4.62	0.0385	1
negative regulation of centrosome duplication (GO:0010826)	12	3	0.65	+	4.62	0.0385	1
negative regulation of centrosome cycle (GO:0046606)	12	3	0.65	+	4.62	0.0385	1
regulation of retrograde protein transport, ER to cytosol (GO:1904152)	12	3	0.65	+	4.62	0.0385	1
cell communication by electrical coupling (GO:0010644)	12	3	0.65	+	4.62	0.0385	1
mitotic DNA replication (GO:1902969)	12	3	0.65	+	4.62	0.0385	1
phosphatidylcholine acyl-chain remodeling (GO:0036151)	17	4	0.92	+	4.35	0.0205	1
regulation of Rac protein signal transduction (GO:0035020)	17	4	0.92	+	4.35	0.0205	1
interleukin-7-mediated signaling pathway (GO:0038111)	13	3	0.7	+	4.27	0.0457	1
negative regulation of cell division (GO:0051782)	13	3	0.7	+	4.27	0.0457	1
response to leucine (GO:0043201)	13	3	0.7	+	4.27	0.0457	1
purine-containing compound salvage (GO:0043101)	13	3	0.7	+	4.27	0.0457	1
RNA interference (GO:0016246)	13	3	0.7	+	4.27	0.0457	1
negative regulation of cell size (GO:0045792)	9	2	0.49	+	4.11	0.106	1
regulation of T-helper 2 cell differentiation (GO:0045628)	9	2	0.49	+	4.11	0.106	1
cellular response to epinephrine stimulus (GO:0071872)	9	2	0.49	+	4.11	0.106	1
response to epinephrine (GO:0071871)	9	2	0.49	+	4.11	0.106	1
positive regulation of glycoprotein metabolic process (GO:1903020)	18	4	0.97	+	4.11	0.024	1
SREBP signaling pathway (GO:0032933)	9	2	0.49	+	4.11	0.106	1
regulation of transforming growth factor beta1 production (GO:0032908)	9	2	0.49	+	4.11	0.106	1
neutrophil homeostasis (GO:0001780)	9	2	0.49	+	4.11	0.106	1
regulation of translational fidelity (GO:0006450)	18	4	0.97	+	4.11	0.024	1
response to vitamin E (GO:0033197)	9	2	0.49	+	4.11	0.106	1
DNA replication-dependent nucleosome assembly (GO:0006335)	9	2	0.49	+	4.11	0.106	1
negative regulation of protein exit from endoplasmic reticulum (GO:0070862)	9	2	0.49	+	4.11	0.106	1
regulation of hematopoietic stem cell proliferation (GO:1902033)	9	2	0.49	+	4.11	0.106	1
negative regulation of protein autophosphorylation (GO:0031953)	9	2	0.49	+	4.11	0.106	1
response to interleukin-2 (GO:0070669)	9	2	0.49	+	4.11	0.106	1
RNA polymerase I preinitiation complex assembly (GO:0001188)	9	2	0.49	+	4.11	0.106	1
regulation of acyl-CoA biosynthetic process (GO:0050812)	9	2	0.49	+	4.11	0.106	1
positive regulation of translation in response to stress (GO:0032056)	9	2	0.49	+	4.11	0.106	1
exonucleolytic trimming to generate mature 3'-end of 5.8S rRNA from tricistronic rRNA transcript (SSU-rRNA, 5.8S rRNA, LSU-rRNA) (GO:0000467)	9	2	0.49	+	4.11	0.106	1
exonucleolytic trimming involved in rRNA processing (GO:0000459)	9	2	0.49	+	4.11	0.106	1
protein K11-linked deubiquitination (GO:0035871)	9	2	0.49	+	4.11	0.106	1
arachidonic acid secretion (GO:0050482)	9	2	0.49	+	4.11	0.106	1
positive regulation of mRNA splicing, via spliceosome (GO:0048026)	18	4	0.97	+	4.11	0.024	1
arachidonate transport (GO:1903963)	9	2	0.49	+	4.11	0.106	1
DNA replication-dependent nucleosome organization (GO:0034723)	9	2	0.49	+	4.11	0.106	1
protein kinase A signaling (GO:0010737)	9	2	0.49	+	4.11	0.106	1
positive regulation of phospholipid metabolic process (GO:1903727)	9	2	0.49	+	4.11	0.106	1
pyrimidine nucleobase biosynthetic process (GO:0019856)	9	2	0.49	+	4.11	0.106	1
response to cisplatin (GO:0072718)	9	2	0.49	+	4.11	0.106	1
very-low-density lipoprotein particle assembly (GO:0034379)	9	2	0.49	+	4.11	0.106	1
positive regulation by host of viral process (GO:0044794)	14	3	0.76	+	3.96	0.0534	1
positive regulation of histone H3-K4 methylation (GO:0051571)	14	3	0.76	+	3.96	0.0534	1
positive regulation of cytosolic calcium ion concentration involved in phospholipase C-activating G protein-coupled signaling pathway (GO:0051482)	14	3	0.76	+	3.96	0.0534	1
nuclear envelope disassembly (GO:0051081)	14	3	0.76	+	3.96	0.0534	1
response to superoxide (GO:0000303)	14	3	0.76	+	3.96	0.0534	1
membrane disassembly (GO:0030397)	14	3	0.76	+	3.96	0.0534	1
positive regulation of activated T cell proliferation (GO:0042104)	14	3	0.76	+	3.96	0.0534	1
negative regulation of calcium ion transport into cytosol (GO:0010523)	14	3	0.76	+	3.96	0.0534	1
nitric oxide metabolic process (GO:0046209)	14	3	0.76	+	3.96	0.0534	1
positive regulation of Rho protein signal transduction (GO:0035025)	19	4	1.03	+	3.89	0.0279	1
natural killer cell activation (GO:0030101)	29	6	1.57	+	3.83	0.00809	1
negative regulation of cell volume (GO:0045794)	5	1	0.27	+	3.7	0.271	1
negative regulation of hypoxia-induced intrinsic apoptotic signaling pathway (GO:1903298)	5	1	0.27	+	3.7	0.271	1
regulation of hypoxia-induced intrinsic apoptotic signaling pathway (GO:1903297)	5	1	0.27	+	3.7	0.271	1
alditol catabolic process (GO:0019405)	5	1	0.27	+	3.7	0.271	1
nitrogen cycle metabolic process (GO:0071941)	10	2	0.54	+	3.7	0.123	1
regulation of cohesin loading (GO:0071922)	5	1	0.27	+	3.7	0.271	1
negative regulation of monocyte differentiation (GO:0045656)	5	1	0.27	+	3.7	0.271	1
positive regulation of T-helper 2 cell differentiation (GO:0045630)	5	1	0.27	+	3.7	0.271	1
adenosine metabolic process (GO:0046085)	5	1	0.27	+	3.7	0.271	1
positive regulation of steroid hormone secretion (GO:2000833)	5	1	0.27	+	3.7	0.271	1
protein localization to adherens junction (GO:0071896)	5	1	0.27	+	3.7	0.271	1
positive regulation of gamma-delta T cell differentiation (GO:0045588)	5	1	0.27	+	3.7	0.271	1
response to aluminum ion (GO:0010044)	5	1	0.27	+	3.7	0.271	1
positive regulation of podosome assembly (GO:0071803)	5	1	0.27	+	3.7	0.271	1
renal system process involved in regulation of blood volume (GO:0001977)	10	2	0.54	+	3.7	0.123	1
neuromuscular synaptic transmission (GO:0007274)	15	3	0.81	+	3.7	0.0617	1
positive regulation of autophagosome assembly (GO:2000786)	10	2	0.54	+	3.7	0.123	1
regulation of basement membrane organization (GO:0110011)	5	1	0.27	+	3.7	0.271	1
negative regulation of stem cell proliferation (GO:2000647)	5	1	0.27	+	3.7	0.271	1
regulation of dopamine receptor signaling pathway (GO:0060159)	5	1	0.27	+	3.7	0.271	1
regulation of histone H4-K16 acetylation (GO:2000618)	5	1	0.27	+	3.7	0.271	1
cellular response to indole-3-methanol (GO:0071681)	5	1	0.27	+	3.7	0.271	1
response to indole-3-methanol (GO:0071680)	5	1	0.27	+	3.7	0.271	1
wound healing involved in inflammatory response (GO:0002246)	5	1	0.27	+	3.7	0.271	1
lysosomal lumen acidification (GO:0007042)	10	2	0.54	+	3.7	0.123	1
relaxation of vascular associated smooth muscle (GO:0060087)	5	1	0.27	+	3.7	0.271	1
post-chaperonin tubulin folding pathway (GO:0007023)	5	1	0.27	+	3.7	0.271	1
membrane hyperpolarization (GO:0060081)	5	1	0.27	+	3.7	0.271	1
somatostatin signaling pathway (GO:0038170)	5	1	0.27	+	3.7	0.271	1
somatostatin receptor signaling pathway (GO:0038169)	5	1	0.27	+	3.7	0.271	1
oncostatin-M-mediated signaling pathway (GO:0038165)	5	1	0.27	+	3.7	0.271	1
negative regulation by host of viral genome replication (GO:0044828)	5	1	0.27	+	3.7	0.271	1
parathyroid gland development (GO:0060017)	5	1	0.27	+	3.7	0.271	1
regulation of relaxation of cardiac muscle (GO:1901897)	5	1	0.27	+	3.7	0.271	1
regulation of catecholamine uptake involved in synaptic transmission (GO:0051940)	5	1	0.27	+	3.7	0.271	1
secretion of lysosomal enzymes (GO:0033299)	5	1	0.27	+	3.7	0.271	1
cellular response to sterol depletion (GO:0071501)	10	2	0.54	+	3.7	0.123	1
ubiquitin-independent protein catabolic process via the multivesicular body sorting pathway (GO:0090611)	5	1	0.27	+	3.7	0.271	1
positive regulation by host of viral release from host cell (GO:0044791)	5	1	0.27	+	3.7	0.271	1
modulation by host of viral release from host cell (GO:0044789)	5	1	0.27	+	3.7	0.271	1
multi-organism cellular process (GO:0044764)	15	3	0.81	+	3.7	0.0617	1
positive regulation of protein neddylation (GO:2000436)	5	1	0.27	+	3.7	0.271	1
positive regulation of intrinsic apoptotic signaling pathway in response to DNA damage (GO:1902231)	5	1	0.27	+	3.7	0.271	1
protein C-linked glycosylation via 2'-alpha-mannosyl-L-tryptophan (GO:0018406)	5	1	0.27	+	3.7	0.271	1
positive regulation of neuron maturation (GO:0014042)	5	1	0.27	+	3.7	0.271	1
regulation of L-glutamate import across plasma membrane (GO:0002036)	5	1	0.27	+	3.7	0.271	1
angiotensin maturation (GO:0002003)	5	1	0.27	+	3.7	0.271	1
regulation of angiotensin levels in blood (GO:0002002)	5	1	0.27	+	3.7	0.271	1
positive regulation of histone deacetylase activity (GO:1901727)	5	1	0.27	+	3.7	0.271	1
dephosphorylation of RNA polymerase II C-terminal domain (GO:0070940)	5	1	0.27	+	3.7	0.271	1
luteinization (GO:0001553)	5	1	0.27	+	3.7	0.271	1
aminophospholipid translocation (GO:0140331)	5	1	0.27	+	3.7	0.271	1
positive regulation of oxidative stress-induced intrinsic apoptotic signaling pathway (GO:1902177)	5	1	0.27	+	3.7	0.271	1
protein C-linked glycosylation via tryptophan (GO:0018317)	5	1	0.27	+	3.7	0.271	1
constitutive secretory pathway (GO:0045054)	5	1	0.27	+	3.7	0.271	1
positive regulation of killing of cells of other organism (GO:0051712)	5	1	0.27	+	3.7	0.271	1
hexose import across plasma membrane (GO:0140271)	5	1	0.27	+	3.7	0.271	1
regulation of translation at synapse (GO:0140243)	5	1	0.27	+	3.7	0.271	1
relaxation of smooth muscle (GO:0044557)	5	1	0.27	+	3.7	0.271	1
positive regulation of feeding behavior (GO:2000253)	5	1	0.27	+	3.7	0.271	1
response to L-glutamate (GO:1902065)	10	2	0.54	+	3.7	0.123	1
peptidyl-tryptophan modification (GO:0018211)	5	1	0.27	+	3.7	0.271	1
protein K69-linked ufmylation (GO:1990592)	5	1	0.27	+	3.7	0.271	1
L-methionine salvage (GO:0071267)	5	1	0.27	+	3.7	0.271	1
L-methionine biosynthetic process (GO:0071265)	5	1	0.27	+	3.7	0.271	1
UDP-N-acetylglucosamine transmembrane transport (GO:1990569)	5	1	0.27	+	3.7	0.271	1
protein polyufmylation (GO:1990564)	5	1	0.27	+	3.7	0.271	1
response to camptothecin (GO:1901563)	5	1	0.27	+	3.7	0.271	1
replicative senescence (GO:0090399)	15	3	0.81	+	3.7	0.0617	1
dense core granule exocytosis (GO:1990504)	5	1	0.27	+	3.7	0.271	1
positive regulation of hematopoietic progenitor cell differentiation (GO:1901534)	5	1	0.27	+	3.7	0.271	1
negative regulation of mitophagy (GO:1901525)	5	1	0.27	+	3.7	0.271	1
maintenance of synapse structure (GO:0099558)	15	3	0.81	+	3.7	0.0617	1
regulation of translation at synapse, modulating synaptic transmission (GO:0099547)	5	1	0.27	+	3.7	0.271	1
regulation of development, heterochronic (GO:0040034)	5	1	0.27	+	3.7	0.271	1
regulation of sodium:proton antiporter activity (GO:0032415)	5	1	0.27	+	3.7	0.271	1
AMP biosynthetic process (GO:0006167)	5	1	0.27	+	3.7	0.271	1
protein C-linked glycosylation (GO:0018103)	5	1	0.27	+	3.7	0.271	1
regulation of dopamine uptake involved in synaptic transmission (GO:0051584)	5	1	0.27	+	3.7	0.271	1
histone H3-K23 acetylation (GO:0043972)	5	1	0.27	+	3.7	0.271	1
mRNA pseudouridine synthesis (GO:1990481)	5	1	0.27	+	3.7	0.271	1
regulation of neurotransmitter uptake (GO:0051580)	10	2	0.54	+	3.7	0.123	1
regulation of glutamine family amino acid metabolic process (GO:0000820)	5	1	0.27	+	3.7	0.271	1
negative regulation of histone H3-K9 methylation (GO:0051573)	10	2	0.54	+	3.7	0.123	1
negative regulation of histone H3-K4 methylation (GO:0051572)	5	1	0.27	+	3.7	0.271	1
succinate metabolic process (GO:0006105)	5	1	0.27	+	3.7	0.271	1
citrate metabolic process (GO:0006101)	5	1	0.27	+	3.7	0.271	1
regulation of keratinocyte migration (GO:0051547)	10	2	0.54	+	3.7	0.123	1
maintenance of presynaptic active zone structure (GO:0048790)	5	1	0.27	+	3.7	0.271	1
icosanoid secretion (GO:0032309)	10	2	0.54	+	3.7	0.123	1
glucuronate catabolic process (GO:0006064)	5	1	0.27	+	3.7	0.271	1
positive regulation of phospholipid biosynthetic process (GO:0071073)	5	1	0.27	+	3.7	0.271	1
negative regulation of phospholipid biosynthetic process (GO:0071072)	5	1	0.27	+	3.7	0.271	1
regulation of DNA helicase activity (GO:1905774)	5	1	0.27	+	3.7	0.271	1
excitatory chemical synaptic transmission (GO:0098976)	5	1	0.27	+	3.7	0.271	1
nuclear retention of pre-mRNA at the site of transcription (GO:0071033)	5	1	0.27	+	3.7	0.271	1
regulation of ventricular cardiac muscle cell action potential (GO:0098911)	10	2	0.54	+	3.7	0.123	1
positive regulation of store-operated calcium channel activity (GO:1901341)	5	1	0.27	+	3.7	0.271	1
endoplasmic reticulum membrane organization (GO:0090158)	5	1	0.27	+	3.7	0.271	1
histone H3-K36 demethylation (GO:0070544)	10	2	0.54	+	3.7	0.123	1
embryonic foregut morphogenesis (GO:0048617)	5	1	0.27	+	3.7	0.271	1
regulation of adenylate cyclase-activating G protein-coupled receptor signaling pathway (GO:0106070)	10	2	0.54	+	3.7	0.123	1
activation of store-operated calcium channel activity (GO:0032237)	5	1	0.27	+	3.7	0.271	1
regulation of lysosome organization (GO:1905671)	5	1	0.27	+	3.7	0.271	1
modulation of inhibitory postsynaptic potential (GO:0098828)	5	1	0.27	+	3.7	0.271	1
positive regulation of extracellular matrix disassembly (GO:0090091)	5	1	0.27	+	3.7	0.271	1
negative regulation of pinocytosis (GO:0048550)	5	1	0.27	+	3.7	0.271	1
xylulose 5-phosphate biosynthetic process (GO:1901159)	5	1	0.27	+	3.7	0.271	1
carbohydrate import across plasma membrane (GO:0098704)	5	1	0.27	+	3.7	0.271	1
protein deglycosylation involved in glycoprotein catabolic process (GO:0035977)	5	1	0.27	+	3.7	0.271	1
regulation of translational initiation in response to stress (GO:0043558)	10	2	0.54	+	3.7	0.123	1
xylulose 5-phosphate metabolic process (GO:0051167)	5	1	0.27	+	3.7	0.271	1
glucosamine-containing compound catabolic process (GO:1901072)	5	1	0.27	+	3.7	0.271	1
synaptic growth at neuromuscular junction (GO:0051124)	5	1	0.27	+	3.7	0.271	1
positive regulation of exit from mitosis (GO:0031536)	5	1	0.27	+	3.7	0.271	1
positive regulation of DNA ligation (GO:0051106)	5	1	0.27	+	3.7	0.271	1
positive regulation of retinoic acid receptor signaling pathway (GO:0048386)	5	1	0.27	+	3.7	0.271	1
Golgi inheritance (GO:0048313)	10	2	0.54	+	3.7	0.123	1
organelle inheritance (GO:0048308)	10	2	0.54	+	3.7	0.123	1
spliceosomal conformational changes to generate catalytic conformation (GO:0000393)	5	1	0.27	+	3.7	0.271	1
learned vocalization behavior or vocal learning (GO:0098598)	5	1	0.27	+	3.7	0.271	1
observational learning (GO:0098597)	5	1	0.27	+	3.7	0.271	1
negative regulation of helicase activity (GO:0051097)	5	1	0.27	+	3.7	0.271	1
imitative learning (GO:0098596)	5	1	0.27	+	3.7	0.271	1
response to oxygen radical (GO:0000305)	15	3	0.81	+	3.7	0.0617	1
negative regulation of vascular endothelial growth factor receptor signaling pathway (GO:0030948)	10	2	0.54	+	3.7	0.123	1
negative regulation of mitochondrial membrane permeability (GO:0035795)	5	1	0.27	+	3.7	0.271	1
regulation of prostaglandin biosynthetic process (GO:0031392)	5	1	0.27	+	3.7	0.271	1
common myeloid progenitor cell proliferation (GO:0035726)	5	1	0.27	+	3.7	0.271	1
Golgi vesicle budding (GO:0048194)	10	2	0.54	+	3.7	0.123	1
regulation of short-term neuronal synaptic plasticity (GO:0048172)	10	2	0.54	+	3.7	0.123	1
auditory behavior (GO:0031223)	5	1	0.27	+	3.7	0.271	1
regulation of cytoplasmic translational initiation (GO:1904688)	5	1	0.27	+	3.7	0.271	1
regulation of developmental pigmentation (GO:0048070)	10	2	0.54	+	3.7	0.123	1
post-embryonic eye morphogenesis (GO:0048050)	5	1	0.27	+	3.7	0.271	1
positive regulation of NLRP3 inflammasome complex assembly (GO:1900227)	5	1	0.27	+	3.7	0.271	1
urea cycle (GO:0000050)	10	2	0.54	+	3.7	0.123	1
endoplasmic reticulum-plasma membrane tethering (GO:0061817)	5	1	0.27	+	3.7	0.271	1
amino acid salvage (GO:0043102)	5	1	0.27	+	3.7	0.271	1
rRNA 3'-end processing (GO:0031125)	10	2	0.54	+	3.7	0.123	1
response to glycoprotein (GO:1904587)	5	1	0.27	+	3.7	0.271	1
positive regulation of lipophagy (GO:1904504)	5	1	0.27	+	3.7	0.271	1
regulation of lipophagy (GO:1904502)	5	1	0.27	+	3.7	0.271	1
negative regulation of histone H3-K9 trimethylation (GO:1900113)	5	1	0.27	+	3.7	0.271	1
choline transport (GO:0015871)	5	1	0.27	+	3.7	0.271	1
calcitonin family receptor signaling pathway (GO:0097646)	5	1	0.27	+	3.7	0.271	1
lysosomal microautophagy (GO:0016237)	5	1	0.27	+	3.7	0.271	1
pentose-phosphate shunt, non-oxidative branch (GO:0009052)	5	1	0.27	+	3.7	0.271	1
dosage compensation by inactivation of X chromosome (GO:0009048)	15	3	0.81	+	3.7	0.0617	1
mannose trimming involved in glycoprotein ERAD pathway (GO:1904382)	5	1	0.27	+	3.7	0.271	1
synaptic vesicle maturation (GO:0016188)	10	2	0.54	+	3.7	0.123	1
regulation of cardiac muscle contraction by calcium ion signaling (GO:0010882)	20	4	1.08	+	3.7	0.0322	1
regulation of cardiac muscle contraction by regulation of the release of sequestered calcium ion (GO:0010881)	15	3	0.81	+	3.7	0.0617	1
negative regulation of IRE1-mediated unfolded protein response (GO:1903895)	5	1	0.27	+	3.7	0.271	1
extraembryonic membrane development (GO:1903867)	5	1	0.27	+	3.7	0.271	1
oxygen transport (GO:0015671)	5	1	0.27	+	3.7	0.271	1
positive regulation of basement membrane assembly involved in embryonic body morphogenesis (GO:1904261)	5	1	0.27	+	3.7	0.271	1
ubiquitin-dependent glycoprotein ERAD pathway (GO:0097466)	5	1	0.27	+	3.7	0.271	1
regulation of basement membrane assembly involved in embryonic body morphogenesis (GO:1904259)	5	1	0.27	+	3.7	0.271	1
keratan sulfate catabolic process (GO:0042340)	5	1	0.27	+	3.7	0.271	1
piecemeal microautophagy of the nucleus (GO:0034727)	5	1	0.27	+	3.7	0.271	1
synaptic vesicle docking (GO:0016081)	10	2	0.54	+	3.7	0.123	1
rhodopsin mediated signaling pathway (GO:0016056)	5	1	0.27	+	3.7	0.271	1
regulation of inorganic anion transmembrane transport (GO:1903795)	5	1	0.27	+	3.7	0.271	1
regulation of MDA-5 signaling pathway (GO:0039533)	5	1	0.27	+	3.7	0.271	1
regulation of centriole elongation (GO:1903722)	5	1	0.27	+	3.7	0.271	1
vocal learning (GO:0042297)	5	1	0.27	+	3.7	0.271	1
positive regulation of centriole replication (GO:0046601)	5	1	0.27	+	3.7	0.271	1
cardiac muscle cell apoptotic process (GO:0010659)	5	1	0.27	+	3.7	0.271	1
striated muscle cell apoptotic process (GO:0010658)	5	1	0.27	+	3.7	0.271	1
programmed cell death involved in cell development (GO:0010623)	5	1	0.27	+	3.7	0.271	1
negative regulation of sprouting angiogenesis (GO:1903671)	10	2	0.54	+	3.7	0.123	1
regulation of protein tyrosine phosphatase activity (GO:1903613)	5	1	0.27	+	3.7	0.271	1
smoothened signaling pathway involved in dorsal/ventral neural tube patterning (GO:0060831)	5	1	0.27	+	3.7	0.271	1
protoporphyrinogen IX metabolic process (GO:0046501)	10	2	0.54	+	3.7	0.123	1
pancreatic juice secretion (GO:0030157)	5	1	0.27	+	3.7	0.271	1
desmosome organization (GO:0002934)	10	2	0.54	+	3.7	0.123	1
negative regulation of phospholipase activity (GO:0010519)	5	1	0.27	+	3.7	0.271	1
hair follicle placode formation (GO:0060789)	5	1	0.27	+	3.7	0.271	1
positive regulation of mast cell chemotaxis (GO:0060754)	5	1	0.27	+	3.7	0.271	1
response to sorbitol (GO:0072708)	5	1	0.27	+	3.7	0.271	1
positive regulation of inhibitory postsynaptic potential (GO:0097151)	5	1	0.27	+	3.7	0.271	1
negative regulation of heart rate (GO:0010459)	5	1	0.27	+	3.7	0.271	1
fungiform papilla morphogenesis (GO:0061197)	5	1	0.27	+	3.7	0.271	1
regulation of T-helper 1 type immune response (GO:0002825)	15	3	0.81	+	3.7	0.0617	1
glyceraldehyde-3-phosphate metabolic process (GO:0019682)	5	1	0.27	+	3.7	0.271	1
negative regulation of translational elongation (GO:0045900)	5	1	0.27	+	3.7	0.271	1
glucuronate catabolic process to xylulose 5-phosphate (GO:0019640)	5	1	0.27	+	3.7	0.271	1
urea metabolic process (GO:0019627)	10	2	0.54	+	3.7	0.123	1
osteoclast fusion (GO:0072675)	5	1	0.27	+	3.7	0.271	1
lamellipodium morphogenesis (GO:0072673)	5	1	0.27	+	3.7	0.271	1
branching involved in labyrinthine layer morphogenesis (GO:0060670)	10	2	0.54	+	3.7	0.123	1
chylomicron assembly (GO:0034378)	5	1	0.27	+	3.7	0.271	1
synaptic vesicle clustering (GO:0097091)	5	1	0.27	+	3.7	0.271	1
negative regulation of alcohol biosynthetic process (GO:1902931)	10	2	0.54	+	3.7	0.123	1
regulation of dendritic cell cytokine production (GO:0002730)	10	2	0.54	+	3.7	0.123	1
regulation of adherens junction organization (GO:1903391)	5	1	0.27	+	3.7	0.271	1
regulation of endoplasmic reticulum tubular network organization (GO:1903371)	5	1	0.27	+	3.7	0.271	1
neurotransmitter-gated ion channel clustering (GO:0072578)	5	1	0.27	+	3.7	0.271	1
dosage compensation (GO:0007549)	15	3	0.81	+	3.7	0.0617	1
L-methionine salvage from methylthioadenosine (GO:0019509)	5	1	0.27	+	3.7	0.271	1
adult heart development (GO:0007512)	5	1	0.27	+	3.7	0.271	1
type I pneumocyte differentiation (GO:0060509)	5	1	0.27	+	3.7	0.271	1
tricarboxylic acid cycle (GO:0006099)	31	6	1.68	+	3.58	0.0106	1
reactive oxygen species biosynthetic process (GO:1903409)	21	4	1.14	+	3.52	0.0368	1
reactive nitrogen species metabolic process (GO:2001057)	16	3	0.87	+	3.47	0.0706	1
regulation of fatty acid beta-oxidation (GO:0031998)	16	3	0.87	+	3.47	0.0706	1
positive regulation of long-term synaptic potentiation (GO:1900273)	16	3	0.87	+	3.47	0.0706	1
transcription elongation from RNA polymerase I promoter (GO:0006362)	27	5	1.46	+	3.43	0.0223	1
erythrocyte development (GO:0048821)	27	5	1.46	+	3.43	0.0223	1
positive regulation of mRNA processing (GO:0050685)	27	5	1.46	+	3.43	0.0223	1
cell communication involved in cardiac conduction (GO:0086065)	27	5	1.46	+	3.43	0.0223	1
cell junction maintenance (GO:0034331)	27	5	1.46	+	3.43	0.0223	1
aerobic respiration (GO:0009060)	65	12	3.51	+	3.41	0.000516	1
negative regulation of fatty acid biosynthetic process (GO:0045717)	11	2	0.59	+	3.36	0.141	1
response to sterol depletion (GO:0006991)	11	2	0.59	+	3.36	0.141	1
growth hormone receptor signaling pathway (GO:0060396)	11	2	0.59	+	3.36	0.141	1
nitric oxide biosynthetic process (GO:0006809)	11	2	0.59	+	3.36	0.141	1
superoxide metabolic process (GO:0006801)	22	4	1.19	+	3.36	0.0418	1
regulation of feeding behavior (GO:0060259)	11	2	0.59	+	3.36	0.141	1
positive regulation of glial cell proliferation (GO:0060252)	11	2	0.59	+	3.36	0.141	1
ATP biosynthetic process (GO:0006754)	22	4	1.19	+	3.36	0.0418	1
positive regulation of amino acid transport (GO:0051957)	11	2	0.59	+	3.36	0.141	1
cell-cell junction maintenance (GO:0045217)	11	2	0.59	+	3.36	0.141	1
histone H4 deacetylation (GO:0070933)	11	2	0.59	+	3.36	0.141	1
cellular response to growth hormone stimulus (GO:0071378)	11	2	0.59	+	3.36	0.141	1
regulation of hair follicle development (GO:0051797)	11	2	0.59	+	3.36	0.141	1
mitochondrial electron transport, ubiquinol to cytochrome c (GO:0006122)	11	2	0.59	+	3.36	0.141	1
positive regulation of oligodendrocyte differentiation (GO:0048714)	11	2	0.59	+	3.36	0.141	1
cellular aldehyde metabolic process (GO:0006081)	44	8	2.38	+	3.36	0.00468	1
regulation of extracellular matrix assembly (GO:1901201)	11	2	0.59	+	3.36	0.141	1
positive regulation of sequestering of calcium ion (GO:0051284)	11	2	0.59	+	3.36	0.141	1
negative regulation of release of sequestered calcium ion into cytosol (GO:0051280)	11	2	0.59	+	3.36	0.141	1
anoikis (GO:0043276)	11	2	0.59	+	3.36	0.141	1
insulin-like growth factor receptor signaling pathway (GO:0048009)	11	2	0.59	+	3.36	0.141	1
negative regulation of protein import (GO:1904590)	11	2	0.59	+	3.36	0.141	1
vitamin biosynthetic process (GO:0009110)	11	2	0.59	+	3.36	0.141	1
synaptic vesicle priming (GO:0016082)	11	2	0.59	+	3.36	0.141	1
negative regulation of protein import into nucleus (GO:0042308)	11	2	0.59	+	3.36	0.141	1
retina vasculature development in camera-type eye (GO:0061298)	11	2	0.59	+	3.36	0.141	1
response to hydroxyurea (GO:0072710)	11	2	0.59	+	3.36	0.141	1
adherens junction assembly (GO:0034333)	11	2	0.59	+	3.36	0.141	1
positive regulation of membrane potential (GO:0045838)	11	2	0.59	+	3.36	0.141	1
viral protein processing (GO:0019082)	39	7	2.11	+	3.32	0.00847	1
termination of RNA polymerase I transcription (GO:0006363)	28	5	1.51	+	3.3	0.0252	1
basement membrane organization (GO:0071711)	17	3	0.92	+	3.26	0.08	1
regulation of myeloid cell apoptotic process (GO:0033032)	17	3	0.92	+	3.26	0.08	1
regulation of endocrine process (GO:0044060)	17	3	0.92	+	3.26	0.08	1
positive regulation of Ras protein signal transduction (GO:0046579)	51	9	2.76	+	3.26	0.0033	1
retrograde axonal transport (GO:0008090)	17	3	0.92	+	3.26	0.08	1
myeloid cell homeostasis (GO:0002262)	91	16	4.92	+	3.25	0.000107	0.785
modulation by host of viral process (GO:0044788)	23	4	1.24	+	3.22	0.0471	1
regulation of protein exit from endoplasmic reticulum (GO:0070861)	23	4	1.24	+	3.22	0.0471	1
regulation of sensory perception of pain (GO:0051930)	18	3	0.97	+	3.08	0.09	1
transcription initiation from RNA polymerase I promoter (GO:0006361)	36	6	1.95	+	3.08	0.0193	1
response to immobilization stress (GO:0035902)	18	3	0.97	+	3.08	0.09	1
telomere capping (GO:0016233)	18	3	0.97	+	3.08	0.09	1
negative regulation of steroid biosynthetic process (GO:0010894)	18	3	0.97	+	3.08	0.09	1
plasma lipoprotein particle assembly (GO:0034377)	18	3	0.97	+	3.08	0.09	1
diol biosynthetic process (GO:0034312)	18	3	0.97	+	3.08	0.09	1
positive regulation of potassium ion import across plasma membrane (GO:1903288)	6	1	0.32	+	3.08	0.308	1
triglyceride catabolic process (GO:0019433)	12	2	0.65	+	3.08	0.159	1
foregut morphogenesis (GO:0007440)	6	1	0.32	+	3.08	0.308	1
renal system process involved in regulation of systemic arterial blood pressure (GO:0003071)	12	2	0.65	+	3.08	0.159	1
tetrahydrobiopterin metabolic process (GO:0046146)	12	2	0.65	+	3.08	0.159	1
positive regulation of toll-like receptor 3 signaling pathway (GO:0034141)	6	1	0.32	+	3.08	0.308	1
positive regulation of osteoblast proliferation (GO:0033690)	6	1	0.32	+	3.08	0.308	1
plus-end-directed vesicle transport along microtubule (GO:0072383)	6	1	0.32	+	3.08	0.308	1
central nervous system maturation (GO:0021626)	6	1	0.32	+	3.08	0.308	1
regulation of glucocorticoid secretion (GO:2000849)	6	1	0.32	+	3.08	0.308	1
regulation of behavioral fear response (GO:2000822)	6	1	0.32	+	3.08	0.308	1
purine ribonucleoside bisphosphate biosynthetic process (GO:0034036)	6	1	0.32	+	3.08	0.308	1
regulation of caveolin-mediated endocytosis (GO:2001286)	6	1	0.32	+	3.08	0.308	1
regulation of unsaturated fatty acid biosynthetic process (GO:2001279)	6	1	0.32	+	3.08	0.308	1
meiotic chromosome condensation (GO:0010032)	6	1	0.32	+	3.08	0.308	1
regulation of protein lipidation (GO:1903059)	6	1	0.32	+	3.08	0.308	1
regulation of systemic arterial blood pressure by circulatory renin-angiotensin (GO:0001991)	6	1	0.32	+	3.08	0.308	1
G protein-coupled adenosine receptor signaling pathway (GO:0001973)	6	1	0.32	+	3.08	0.308	1
rhombomere development (GO:0021546)	6	1	0.32	+	3.08	0.308	1
tyrosine phosphorylation of STAT protein (GO:0007260)	6	1	0.32	+	3.08	0.308	1
intramembranous ossification (GO:0001957)	6	1	0.32	+	3.08	0.308	1
protein localization to nucleolus (GO:1902570)	6	1	0.32	+	3.08	0.308	1
common-partner SMAD protein phosphorylation (GO:0007182)	6	1	0.32	+	3.08	0.308	1
inositol trisphosphate metabolic process (GO:0032957)	6	1	0.32	+	3.08	0.308	1
sphingomyelin biosynthetic process (GO:0006686)	6	1	0.32	+	3.08	0.308	1
negative regulation of transforming growth factor beta1 production (GO:0032911)	6	1	0.32	+	3.08	0.308	1
T-helper cell lineage commitment (GO:0002295)	6	1	0.32	+	3.08	0.308	1
regulation of meiotic cell cycle phase transition (GO:1901993)	6	1	0.32	+	3.08	0.308	1
dense core granule transport (GO:1901950)	6	1	0.32	+	3.08	0.308	1
auditory receptor cell stereocilium organization (GO:0060088)	12	2	0.65	+	3.08	0.159	1
nucleolus organization (GO:0007000)	6	1	0.32	+	3.08	0.308	1
proximal tubule development (GO:0072014)	6	1	0.32	+	3.08	0.308	1
regulation of protein glycosylation (GO:0060049)	12	2	0.65	+	3.08	0.159	1
righting reflex (GO:0060013)	6	1	0.32	+	3.08	0.308	1
positive regulation of apoptotic process involved in morphogenesis (GO:1902339)	6	1	0.32	+	3.08	0.308	1
amino-acid betaine biosynthetic process (GO:0006578)	6	1	0.32	+	3.08	0.308	1
isoleucine metabolic process (GO:0006549)	6	1	0.32	+	3.08	0.308	1
protein ufmylation (GO:0071569)	6	1	0.32	+	3.08	0.308	1
mitochondrial tRNA processing (GO:0090646)	12	2	0.65	+	3.08	0.159	1
positive regulation of CREB transcription factor activity (GO:0032793)	12	2	0.65	+	3.08	0.159	1
reelin-mediated signaling pathway (GO:0038026)	6	1	0.32	+	3.08	0.308	1
cellular response to UV-C (GO:0071494)	6	1	0.32	+	3.08	0.308	1
regulation of synapse structural plasticity (GO:0051823)	6	1	0.32	+	3.08	0.308	1
inflammatory response to wounding (GO:0090594)	6	1	0.32	+	3.08	0.308	1
presynaptic active zone organization (GO:1990709)	6	1	0.32	+	3.08	0.308	1
positive regulation of cell proliferation involved in kidney development (GO:1901724)	6	1	0.32	+	3.08	0.308	1
negative regulation of intracellular steroid hormone receptor signaling pathway (GO:0033144)	30	5	1.62	+	3.08	0.0317	1
glomerular visceral epithelial cell migration (GO:0090521)	6	1	0.32	+	3.08	0.308	1
production of small RNA involved in gene silencing by RNA (GO:0070918)	30	5	1.62	+	3.08	0.0317	1
regulation of gene expression by genetic imprinting (GO:0006349)	12	2	0.65	+	3.08	0.159	1
positive regulation of hair follicle development (GO:0051798)	6	1	0.32	+	3.08	0.308	1
cellular response to interleukin-18 (GO:0071351)	6	1	0.32	+	3.08	0.308	1
double-strand break repair via synthesis-dependent strand annealing (GO:0045003)	6	1	0.32	+	3.08	0.308	1
positive regulation of myeloid cell apoptotic process (GO:0033034)	6	1	0.32	+	3.08	0.308	1
positive regulation of protein exit from endoplasmic reticulum (GO:0070863)	12	2	0.65	+	3.08	0.159	1
tRNA surveillance (GO:0106354)	6	1	0.32	+	3.08	0.308	1
transcription-dependent tethering of RNA polymerase II gene DNA at nuclear periphery (GO:0000972)	6	1	0.32	+	3.08	0.308	1
trans-synaptic signaling, modulating synaptic transmission (GO:0099550)	6	1	0.32	+	3.08	0.308	1
regulation of removal of superoxide radicals (GO:2000121)	6	1	0.32	+	3.08	0.308	1
dense core granule cytoskeletal transport (GO:0099519)	6	1	0.32	+	3.08	0.308	1
positive regulation of DNA-dependent DNA replication (GO:2000105)	12	2	0.65	+	3.08	0.159	1
'de novo' IMP biosynthetic process (GO:0006189)	6	1	0.32	+	3.08	0.308	1
histone H4-R3 methylation (GO:0043985)	6	1	0.32	+	3.08	0.308	1
isocitrate metabolic process (GO:0006102)	6	1	0.32	+	3.08	0.308	1
regulation of glucocorticoid biosynthetic process (GO:0031946)	6	1	0.32	+	3.08	0.308	1
positive regulation of calcium ion import (GO:0090280)	12	2	0.65	+	3.08	0.159	1
regulation of histone H4 acetylation (GO:0090239)	12	2	0.65	+	3.08	0.159	1
regulation of arachidonic acid secretion (GO:0090237)	6	1	0.32	+	3.08	0.308	1
acetyl-CoA biosynthetic process (GO:0006085)	12	2	0.65	+	3.08	0.159	1
uronic acid metabolic process (GO:0006063)	6	1	0.32	+	3.08	0.308	1
double-strand break repair via break-induced replication (GO:0000727)	12	2	0.65	+	3.08	0.159	1
nuclear polyadenylation-dependent ncRNA catabolic process (GO:0071046)	6	1	0.32	+	3.08	0.308	1
nuclear polyadenylation-dependent tRNA catabolic process (GO:0071038)	6	1	0.32	+	3.08	0.308	1
nuclear polyadenylation-dependent rRNA catabolic process (GO:0071035)	6	1	0.32	+	3.08	0.308	1
nuclear ncRNA surveillance (GO:0071029)	6	1	0.32	+	3.08	0.308	1
dense core granule localization (GO:0032253)	6	1	0.32	+	3.08	0.308	1
voluntary musculoskeletal movement (GO:0050882)	6	1	0.32	+	3.08	0.308	1
positive regulation of behavior (GO:0048520)	12	2	0.65	+	3.08	0.159	1
negative regulation of vascular endothelial growth factor signaling pathway (GO:1900747)	6	1	0.32	+	3.08	0.308	1
negative regulation of dendrite morphogenesis (GO:0050774)	6	1	0.32	+	3.08	0.308	1
positive regulation of focal adhesion disassembly (GO:0120183)	6	1	0.32	+	3.08	0.308	1
regulation of focal adhesion disassembly (GO:0120182)	6	1	0.32	+	3.08	0.308	1
positive regulation of vacuole organization (GO:0044090)	12	2	0.65	+	3.08	0.159	1
negative regulation of nuclease activity (GO:0032074)	6	1	0.32	+	3.08	0.308	1
regulation of histone H3-K36 methylation (GO:0000414)	6	1	0.32	+	3.08	0.308	1
regulation of DNA duplex unwinding (GO:1905462)	6	1	0.32	+	3.08	0.308	1
regulation of NK T cell activation (GO:0051133)	6	1	0.32	+	3.08	0.308	1
regulation of DNA ligation (GO:0051105)	6	1	0.32	+	3.08	0.308	1
mRNA 3'-splice site recognition (GO:0000389)	6	1	0.32	+	3.08	0.308	1
detection of virus (GO:0009597)	6	1	0.32	+	3.08	0.308	1
D-amino acid transport (GO:0042940)	6	1	0.32	+	3.08	0.308	1
positive regulation of defense response to bacterium (GO:1900426)	6	1	0.32	+	3.08	0.308	1
spliceosomal tri-snRNP complex assembly (GO:0000244)	12	2	0.65	+	3.08	0.159	1
positive regulation of protein localization to cell cortex (GO:1904778)	6	1	0.32	+	3.08	0.308	1
positive regulation of apoptotic process involved in development (GO:1904747)	6	1	0.32	+	3.08	0.308	1
3'-phosphoadenosine 5'-phosphosulfate biosynthetic process (GO:0050428)	6	1	0.32	+	3.08	0.308	1
phosphatidylinositol acyl-chain remodeling (GO:0036149)	6	1	0.32	+	3.08	0.308	1
autophagic cell death (GO:0048102)	6	1	0.32	+	3.08	0.308	1
interleukin-18-mediated signaling pathway (GO:0035655)	6	1	0.32	+	3.08	0.308	1
regulation of lysosomal protein catabolic process (GO:1905165)	6	1	0.32	+	3.08	0.308	1
lysosomal protein catabolic process (GO:1905146)	6	1	0.32	+	3.08	0.308	1
5S class rRNA transcription by RNA polymerase III (GO:0042791)	6	1	0.32	+	3.08	0.308	1
regulation of somatic stem cell population maintenance (GO:1904672)	6	1	0.32	+	3.08	0.308	1
regulation of sulfur metabolic process (GO:0042762)	12	2	0.65	+	3.08	0.159	1
phosphatidylinositol-3-phosphate biosynthetic process (GO:0036092)	12	2	0.65	+	3.08	0.159	1
negative regulation of circadian rhythm (GO:0042754)	12	2	0.65	+	3.08	0.159	1
direct ossification (GO:0036072)	6	1	0.32	+	3.08	0.308	1
citrulline metabolic process (GO:0000052)	6	1	0.32	+	3.08	0.308	1
G protein-coupled purinergic receptor signaling pathway (GO:0035588)	6	1	0.32	+	3.08	0.308	1
calcium-mediated signaling using intracellular calcium source (GO:0035584)	12	2	0.65	+	3.08	0.159	1
positive regulation of metallopeptidase activity (GO:1905050)	6	1	0.32	+	3.08	0.308	1
copper ion transmembrane transport (GO:0035434)	6	1	0.32	+	3.08	0.308	1
dsRNA processing (GO:0031050)	30	5	1.62	+	3.08	0.0317	1
nucleoside triphosphate catabolic process (GO:0009143)	12	2	0.65	+	3.08	0.159	1
double-strand break repair via classical nonhomologous end joining (GO:0097680)	6	1	0.32	+	3.08	0.308	1
negative regulation of cellular response to hypoxia (GO:1900038)	6	1	0.32	+	3.08	0.308	1
positive regulation of receptor clustering (GO:1903911)	6	1	0.32	+	3.08	0.308	1
regulation of receptor clustering (GO:1903909)	12	2	0.65	+	3.08	0.159	1
regulation of cardiac muscle cell contraction (GO:0086004)	24	4	1.3	+	3.08	0.0528	1
positive regulation of RNA export from nucleus (GO:0046833)	6	1	0.32	+	3.08	0.308	1
negative regulation of protein export from nucleus (GO:0046826)	6	1	0.32	+	3.08	0.308	1
copper ion import (GO:0015677)	6	1	0.32	+	3.08	0.308	1
vitamin K metabolic process (GO:0042373)	6	1	0.32	+	3.08	0.308	1
positive regulation of plasminogen activation (GO:0010756)	6	1	0.32	+	3.08	0.308	1
RIG-I signaling pathway (GO:0039529)	6	1	0.32	+	3.08	0.308	1
negative regulation of phospholipid metabolic process (GO:1903726)	6	1	0.32	+	3.08	0.308	1
positive regulation of gamma-delta T cell activation (GO:0046645)	6	1	0.32	+	3.08	0.308	1
muscle cell apoptotic process (GO:0010657)	6	1	0.32	+	3.08	0.308	1
positive regulation of cytoplasmic mRNA processing body assembly (GO:0010606)	6	1	0.32	+	3.08	0.308	1
endothelial cell fate commitment (GO:0060839)	6	1	0.32	+	3.08	0.308	1
piRNA metabolic process (GO:0034587)	6	1	0.32	+	3.08	0.308	1
development of secondary female sexual characteristics (GO:0046543)	6	1	0.32	+	3.08	0.308	1
retina vasculature morphogenesis in camera-type eye (GO:0061299)	6	1	0.32	+	3.08	0.308	1
early endosome to Golgi transport (GO:0034498)	6	1	0.32	+	3.08	0.308	1
type 2 immune response (GO:0042092)	6	1	0.32	+	3.08	0.308	1
ammonium ion metabolic process (GO:0097164)	12	2	0.65	+	3.08	0.159	1
positive regulation of myeloid leukocyte mediated immunity (GO:0002888)	12	2	0.65	+	3.08	0.159	1
fungiform papilla development (GO:0061196)	6	1	0.32	+	3.08	0.308	1
regulation of phospholipid catabolic process (GO:0060696)	6	1	0.32	+	3.08	0.308	1
grooming behavior (GO:0007625)	6	1	0.32	+	3.08	0.308	1
positive regulation of fatty acid oxidation (GO:0046321)	12	2	0.65	+	3.08	0.159	1
positive regulation of myeloid dendritic cell cytokine production (GO:0002735)	6	1	0.32	+	3.08	0.308	1
regulation of myeloid dendritic cell cytokine production (GO:0002733)	6	1	0.32	+	3.08	0.308	1
positive regulation of cell growth involved in cardiac muscle cell development (GO:0061051)	6	1	0.32	+	3.08	0.308	1
glucuronate metabolic process (GO:0019585)	6	1	0.32	+	3.08	0.308	1
regulation of fear response (GO:1903365)	6	1	0.32	+	3.08	0.308	1
oxalate transport (GO:0019532)	6	1	0.32	+	3.08	0.308	1
peptidyl-proline hydroxylation (GO:0019511)	12	2	0.65	+	3.08	0.159	1
erythrocyte homeostasis (GO:0034101)	74	12	4	+	3	0.00141	1
cytochrome complex assembly (GO:0017004)	31	5	1.68	+	2.98	0.0354	1
regulation of glycoprotein biosynthetic process (GO:0010559)	31	5	1.68	+	2.98	0.0354	1
positive regulation of small GTPase mediated signal transduction (GO:0051057)	56	9	3.03	+	2.97	0.00569	1
regulation of ryanodine-sensitive calcium-release channel activity (GO:0060314)	19	3	1.03	+	2.92	0.1	1
positive regulation of natural killer cell activation (GO:0032816)	19	3	1.03	+	2.92	0.1	1
regulation of sensory perception (GO:0051931)	19	3	1.03	+	2.92	0.1	1
positive regulation of mesenchymal cell proliferation (GO:0002053)	19	3	1.03	+	2.92	0.1	1
regulation of vesicle fusion (GO:0031338)	19	3	1.03	+	2.92	0.1	1
negative regulation of nucleocytoplasmic transport (GO:0046823)	19	3	1.03	+	2.92	0.1	1
regulation of release of sequestered calcium ion into cytosol by sarcoplasmic reticulum (GO:0010880)	19	3	1.03	+	2.92	0.1	1
negative regulation of steroid metabolic process (GO:0045939)	19	3	1.03	+	2.92	0.1	1
regulation of cardiac muscle contraction (GO:0055117)	51	8	2.76	+	2.9	0.0101	1
striatum development (GO:0021756)	13	2	0.7	+	2.85	0.178	1
tricarboxylic acid metabolic process (GO:0072350)	13	2	0.7	+	2.85	0.178	1
NADPH regeneration (GO:0006740)	13	2	0.7	+	2.85	0.178	1
response to nitric oxide (GO:0071731)	13	2	0.7	+	2.85	0.178	1
positive regulation of superoxide anion generation (GO:0032930)	13	2	0.7	+	2.85	0.178	1
microtubule depolymerization (GO:0007019)	13	2	0.7	+	2.85	0.178	1
positive regulation of protein sumoylation (GO:0033235)	13	2	0.7	+	2.85	0.178	1
auditory receptor cell morphogenesis (GO:0002093)	13	2	0.7	+	2.85	0.178	1
histone H3-K9 demethylation (GO:0033169)	13	2	0.7	+	2.85	0.178	1
negative regulation of calcineurin-NFAT signaling cascade (GO:0070885)	13	2	0.7	+	2.85	0.178	1
negative regulation of double-strand break repair via homologous recombination (GO:2000042)	13	2	0.7	+	2.85	0.178	1
tRNA threonylcarbamoyladenosine metabolic process (GO:0070525)	13	2	0.7	+	2.85	0.178	1
negative regulation of calcineurin-mediated signaling (GO:0106057)	13	2	0.7	+	2.85	0.178	1
release of sequestered calcium ion into cytosol (GO:0051209)	26	4	1.41	+	2.85	0.0653	1
cellular response to increased oxygen levels (GO:0036295)	13	2	0.7	+	2.85	0.178	1
regulation of lysosomal lumen pH (GO:0035751)	13	2	0.7	+	2.85	0.178	1
myelin maintenance (GO:0043217)	13	2	0.7	+	2.85	0.178	1
eating behavior (GO:0042755)	13	2	0.7	+	2.85	0.178	1
positive regulation of G2/M transition of mitotic cell cycle (GO:0010971)	26	4	1.41	+	2.85	0.0653	1
negative regulation of transcription from RNA polymerase II promoter in response to stress (GO:0097201)	13	2	0.7	+	2.85	0.178	1
negative regulation of androgen receptor signaling pathway (GO:0060766)	13	2	0.7	+	2.85	0.178	1
protein localization to phagophore assembly site (GO:0034497)	13	2	0.7	+	2.85	0.178	1
trophoblast giant cell differentiation (GO:0060707)	13	2	0.7	+	2.85	0.178	1
CDP-diacylglycerol metabolic process (GO:0046341)	13	2	0.7	+	2.85	0.178	1
glucose import (GO:0046323)	13	2	0.7	+	2.85	0.178	1
negative regulation of heart contraction (GO:0045822)	13	2	0.7	+	2.85	0.178	1
transport of virus (GO:0046794)	59	9	3.19	+	2.82	0.00765	1
oxidative phosphorylation (GO:0006119)	92	14	4.97	+	2.81	0.00102	1
stress granule assembly (GO:0034063)	20	3	1.08	+	2.77	0.111	1
regulation of amino acid transport (GO:0051955)	20	3	1.08	+	2.77	0.111	1
positive regulation of interleukin-2 production (GO:0032743)	20	3	1.08	+	2.77	0.111	1
histone H3 deacetylation (GO:0070932)	20	3	1.08	+	2.77	0.111	1
transcription by RNA polymerase I (GO:0006360)	40	6	2.16	+	2.77	0.0291	1
regulation of transcription by RNA polymerase III (GO:0006359)	20	3	1.08	+	2.77	0.111	1
nuclear-transcribed mRNA poly(A) tail shortening (GO:0000289)	20	3	1.08	+	2.77	0.111	1
negative regulation of histone methylation (GO:0031061)	20	3	1.08	+	2.77	0.111	1
error-prone translesion synthesis (GO:0042276)	20	3	1.08	+	2.77	0.111	1
response to X-ray (GO:0010165)	27	4	1.46	+	2.74	0.0721	1
positive regulation of erythrocyte differentiation (GO:0045648)	27	4	1.46	+	2.74	0.0721	1
negative regulation of sequestering of calcium ion (GO:0051283)	27	4	1.46	+	2.74	0.0721	1
beta-catenin-TCF complex assembly (GO:1904837)	27	4	1.46	+	2.74	0.0721	1
vasodilation (GO:0042311)	27	4	1.46	+	2.74	0.0721	1
production of miRNAs involved in gene silencing by miRNA (GO:0035196)	27	4	1.46	+	2.74	0.0721	1
multi-organism localization (GO:1902579)	61	9	3.3	+	2.73	0.00923	1
multi-organism transport (GO:0044766)	61	9	3.3	+	2.73	0.00923	1
positive regulation of potassium ion transmembrane transport (GO:1901381)	34	5	1.84	+	2.72	0.0477	1
replication fork processing (GO:0031297)	34	5	1.84	+	2.72	0.0477	1
purine nucleoside triphosphate metabolic process (GO:0009144)	48	7	2.6	+	2.7	0.0216	1
maintenance of DNA methylation (GO:0010216)	7	1	0.38	+	2.64	0.344	1
regulation of potassium ion import (GO:1903286)	7	1	0.38	+	2.64	0.344	1
DNA damage response, signal transduction by p53 class mediator resulting in transcription of p21 class mediator (GO:0006978)	14	2	0.76	+	2.64	0.197	1
regulation of toll-like receptor 3 signaling pathway (GO:0034139)	7	1	0.38	+	2.64	0.344	1
positive regulation of toll-like receptor 2 signaling pathway (GO:0034137)	7	1	0.38	+	2.64	0.344	1
positive regulation of tissue remodeling (GO:0034105)	7	1	0.38	+	2.64	0.344	1
monocyte chemotaxis (GO:0002548)	7	1	0.38	+	2.64	0.344	1
positive regulation of T-helper cell differentiation (GO:0045624)	14	2	0.76	+	2.64	0.197	1
negative regulation of endothelial cell differentiation (GO:0045602)	7	1	0.38	+	2.64	0.344	1
negative regulation of autophagy of mitochondrion (GO:1903147)	7	1	0.38	+	2.64	0.344	1
positive regulation of integrin activation (GO:0033625)	7	1	0.38	+	2.64	0.344	1
plus-end-directed organelle transport along microtubule (GO:0072386)	7	1	0.38	+	2.64	0.344	1
regulation of actin filament-based movement (GO:1903115)	28	4	1.51	+	2.64	0.0792	1
regulation of gamma-delta T cell differentiation (GO:0045586)	7	1	0.38	+	2.64	0.344	1
regulation of podosome assembly (GO:0071801)	7	1	0.38	+	2.64	0.344	1
negative regulation of cellular response to vascular endothelial growth factor stimulus (GO:1902548)	7	1	0.38	+	2.64	0.344	1
adenylate cyclase-activating dopamine receptor signaling pathway (GO:0007191)	7	1	0.38	+	2.64	0.344	1
SMAD protein complex assembly (GO:0007183)	7	1	0.38	+	2.64	0.344	1
ribonucleoprotein complex disassembly (GO:0032988)	7	1	0.38	+	2.64	0.344	1
positive regulation of sodium ion transmembrane transporter activity (GO:2000651)	14	2	0.76	+	2.64	0.197	1
positive regulation of histone H3-K9 acetylation (GO:2000617)	7	1	0.38	+	2.64	0.344	1
activin receptor signaling pathway (GO:0032924)	14	2	0.76	+	2.64	0.197	1
positive regulation of mRNA binding (GO:1902416)	7	1	0.38	+	2.64	0.344	1
positive regulation of integrin-mediated signaling pathway (GO:2001046)	7	1	0.38	+	2.64	0.344	1
Leydig cell differentiation (GO:0033327)	7	1	0.38	+	2.64	0.344	1
protein catabolic process in the vacuole (GO:0007039)	7	1	0.38	+	2.64	0.344	1
plasma membrane raft organization (GO:0044857)	7	1	0.38	+	2.64	0.344	1
G-quadruplex DNA unwinding (GO:0044806)	7	1	0.38	+	2.64	0.344	1
positive regulation of natural killer cell differentiation (GO:0032825)	7	1	0.38	+	2.64	0.344	1
interleukin-21-mediated signaling pathway (GO:0038114)	7	1	0.38	+	2.64	0.344	1
L-serine biosynthetic process (GO:0006564)	7	1	0.38	+	2.64	0.344	1
proline metabolic process (GO:0006560)	7	1	0.38	+	2.64	0.344	1
death-inducing signaling complex assembly (GO:0071550)	7	1	0.38	+	2.64	0.344	1
retinoic acid biosynthetic process (GO:0002138)	7	1	0.38	+	2.64	0.344	1
genetic imprinting (GO:0071514)	14	2	0.76	+	2.64	0.197	1
nodal signaling pathway (GO:0038092)	7	1	0.38	+	2.64	0.344	1
positive regulation of granulocyte macrophage colony-stimulating factor production (GO:0032725)	7	1	0.38	+	2.64	0.344	1
cellular response to pH (GO:0071467)	14	2	0.76	+	2.64	0.197	1
disaccharide metabolic process (GO:0005984)	7	1	0.38	+	2.64	0.344	1
protein localization to endoplasmic reticulum exit site (GO:0070973)	7	1	0.38	+	2.64	0.344	1
regulation of granulocyte macrophage colony-stimulating factor production (GO:0032645)	7	1	0.38	+	2.64	0.344	1
cellular response to testosterone stimulus (GO:0071394)	7	1	0.38	+	2.64	0.344	1
cellular response to ATP (GO:0071318)	14	2	0.76	+	2.64	0.197	1
thymic T cell selection (GO:0045061)	7	1	0.38	+	2.64	0.344	1
endosome to lysosome transport via multivesicular body sorting pathway (GO:0032510)	7	1	0.38	+	2.64	0.344	1
establishment of Golgi localization (GO:0051683)	7	1	0.38	+	2.64	0.344	1
phagosome-lysosome fusion (GO:0090385)	7	1	0.38	+	2.64	0.344	1
leukemia inhibitory factor signaling pathway (GO:0048861)	7	1	0.38	+	2.64	0.344	1
regulation of peptidyl-cysteine S-nitrosylation (GO:2000169)	7	1	0.38	+	2.64	0.344	1
extracellular vesicle biogenesis (GO:0140112)	7	1	0.38	+	2.64	0.344	1
negative regulation of cytokinesis (GO:0032466)	7	1	0.38	+	2.64	0.344	1
regulation of phospholipase A2 activity (GO:0032429)	7	1	0.38	+	2.64	0.344	1
histone H4-K12 acetylation (GO:0043983)	7	1	0.38	+	2.64	0.344	1
cellular response to brain-derived neurotrophic factor stimulus (GO:1990416)	7	1	0.38	+	2.64	0.344	1
replication-born double-strand break repair via sister chromatid exchange (GO:1990414)	7	1	0.38	+	2.64	0.344	1
positive regulation of synaptic plasticity (GO:0031915)	7	1	0.38	+	2.64	0.344	1
regulation of skeletal muscle fiber development (GO:0048742)	7	1	0.38	+	2.64	0.344	1
negative regulation of hormone biosynthetic process (GO:0032353)	7	1	0.38	+	2.64	0.344	1
negative regulation of hormone metabolic process (GO:0032351)	7	1	0.38	+	2.64	0.344	1
polyadenylation-dependent snoRNA 3'-end processing (GO:0071051)	7	1	0.38	+	2.64	0.344	1
telomere maintenance via recombination (GO:0000722)	14	2	0.76	+	2.64	0.197	1
protection from non-homologous end joining at telomere (GO:0031848)	7	1	0.38	+	2.64	0.344	1
negative regulation of membrane permeability (GO:1905709)	7	1	0.38	+	2.64	0.344	1
regulation of store-operated calcium channel activity (GO:1901339)	7	1	0.38	+	2.64	0.344	1
regulation of vitamin D receptor signaling pathway (GO:0070562)	7	1	0.38	+	2.64	0.344	1
positive regulation of nucleobase-containing compound transport (GO:0032241)	7	1	0.38	+	2.64	0.344	1
foam cell differentiation (GO:0090077)	7	1	0.38	+	2.64	0.344	1
post-embryonic animal organ morphogenesis (GO:0048563)	7	1	0.38	+	2.64	0.344	1
Peyer's patch development (GO:0048541)	7	1	0.38	+	2.64	0.344	1
mucosa-associated lymphoid tissue development (GO:0048537)	7	1	0.38	+	2.64	0.344	1
cellular response to cold (GO:0070417)	7	1	0.38	+	2.64	0.344	1
cellular response to interleukin-21 (GO:0098757)	7	1	0.38	+	2.64	0.344	1
response to interleukin-21 (GO:0098756)	7	1	0.38	+	2.64	0.344	1
polyadenylation-dependent ncRNA catabolic process (GO:0043634)	7	1	0.38	+	2.64	0.344	1
regulation of postsynaptic density assembly (GO:0099151)	7	1	0.38	+	2.64	0.344	1
regulation of postsynaptic specialization assembly (GO:0099150)	7	1	0.38	+	2.64	0.344	1
negative regulation of translation in response to stress (GO:0032055)	7	1	0.38	+	2.64	0.344	1
pexophagy (GO:0000425)	7	1	0.38	+	2.64	0.344	1
mitophagy (GO:0000423)	7	1	0.38	+	2.64	0.344	1
response to isolation stress (GO:0035900)	7	1	0.38	+	2.64	0.344	1
positive regulation of potassium ion transmembrane transporter activity (GO:1901018)	14	2	0.76	+	2.64	0.197	1
regulation of retinoic acid receptor signaling pathway (GO:0048385)	14	2	0.76	+	2.64	0.197	1
negative regulation of thymocyte apoptotic process (GO:0070244)	7	1	0.38	+	2.64	0.344	1
sodium ion export across plasma membrane (GO:0036376)	7	1	0.38	+	2.64	0.344	1
modulation by symbiont of host autophagy (GO:0075071)	7	1	0.38	+	2.64	0.344	1
positive regulation by symbiont of host autophagy (GO:0075044)	7	1	0.38	+	2.64	0.344	1
cellular response to potassium ion (GO:0035865)	7	1	0.38	+	2.64	0.344	1
peptidyl-diphthamide biosynthetic process from peptidyl-histidine (GO:0017183)	7	1	0.38	+	2.64	0.344	1
peptidyl-diphthamide metabolic process (GO:0017182)	7	1	0.38	+	2.64	0.344	1
positive regulation of protein localization to centrosome (GO:1904781)	7	1	0.38	+	2.64	0.344	1
tRNA transcription by RNA polymerase III (GO:0042797)	7	1	0.38	+	2.64	0.344	1
snRNA transcription by RNA polymerase III (GO:0042796)	7	1	0.38	+	2.64	0.344	1
somatic hypermutation of immunoglobulin genes (GO:0016446)	14	2	0.76	+	2.64	0.197	1
ribosomal small subunit export from nucleus (GO:0000056)	7	1	0.38	+	2.64	0.344	1
ribosomal large subunit export from nucleus (GO:0000055)	7	1	0.38	+	2.64	0.344	1
telomeric D-loop disassembly (GO:0061820)	7	1	0.38	+	2.64	0.344	1
nucleoside salvage (GO:0043174)	14	2	0.76	+	2.64	0.197	1
aminophospholipid transport (GO:0015917)	7	1	0.38	+	2.64	0.344	1
cellular metabolic compound salvage (GO:0043094)	28	4	1.51	+	2.64	0.0792	1
post-embryonic camera-type eye development (GO:0031077)	7	1	0.38	+	2.64	0.344	1
deoxyribonucleoside monophosphate biosynthetic process (GO:0009157)	7	1	0.38	+	2.64	0.344	1
pteridine-containing compound biosynthetic process (GO:0042559)	14	2	0.76	+	2.64	0.197	1
glycolipid transport (GO:0046836)	7	1	0.38	+	2.64	0.344	1
diterpenoid biosynthetic process (GO:0016102)	7	1	0.38	+	2.64	0.344	1
miRNA loading onto RISC involved in gene silencing by miRNA (GO:0035280)	7	1	0.38	+	2.64	0.344	1
regulation by virus of viral protein levels in host cell (GO:0046719)	7	1	0.38	+	2.64	0.344	1
positive regulation of macrophage derived foam cell differentiation (GO:0010744)	7	1	0.38	+	2.64	0.344	1
macrophage derived foam cell differentiation (GO:0010742)	7	1	0.38	+	2.64	0.344	1
tetrahydrofolate biosynthetic process (GO:0046654)	7	1	0.38	+	2.64	0.344	1
regulation of mitotic centrosome separation (GO:0046602)	7	1	0.38	+	2.64	0.344	1
negative regulation of centriole replication (GO:0046600)	7	1	0.38	+	2.64	0.344	1
protein localization to cytoplasmic stress granule (GO:1903608)	7	1	0.38	+	2.64	0.344	1
regulation of mast cell chemotaxis (GO:0060753)	7	1	0.38	+	2.64	0.344	1
T-helper 1 type immune response (GO:0042088)	14	2	0.76	+	2.64	0.197	1
response to denervation involved in regulation of muscle adaptation (GO:0014894)	7	1	0.38	+	2.64	0.344	1
response to muscle inactivity involved in regulation of muscle adaptation (GO:0014877)	7	1	0.38	+	2.64	0.344	1
insulin secretion (GO:0030073)	28	4	1.51	+	2.64	0.0792	1
postsynaptic density assembly (GO:0097107)	7	1	0.38	+	2.64	0.344	1
postsynaptic density organization (GO:0097106)	14	2	0.76	+	2.64	0.197	1
positive regulation of cell maturation (GO:1903431)	7	1	0.38	+	2.64	0.344	1
short-chain fatty acid catabolic process (GO:0019626)	7	1	0.38	+	2.64	0.344	1
multinuclear osteoclast differentiation (GO:0072674)	7	1	0.38	+	2.64	0.344	1
mechanosensory behavior (GO:0007638)	7	1	0.38	+	2.64	0.344	1
high-density lipoprotein particle assembly (GO:0034380)	7	1	0.38	+	2.64	0.344	1
adipose tissue development (GO:0060612)	28	4	1.51	+	2.64	0.0792	1
negative regulation of glial cell apoptotic process (GO:0034351)	7	1	0.38	+	2.64	0.344	1
positive regulation of dendritic cell cytokine production (GO:0002732)	7	1	0.38	+	2.64	0.344	1
regulation of cell growth involved in cardiac muscle cell development (GO:0061050)	14	2	0.76	+	2.64	0.197	1
histone H3-K4 trimethylation (GO:0080182)	14	2	0.76	+	2.64	0.197	1
response to growth hormone (GO:0060416)	21	3	1.14	+	2.64	0.123	1
regulation of glycoprotein metabolic process (GO:1903018)	35	5	1.89	+	2.64	0.0523	1
protein-lipid complex assembly (GO:0065005)	21	3	1.14	+	2.64	0.123	1
vacuolar acidification (GO:0007035)	21	3	1.14	+	2.64	0.123	1
positive regulation of amine transport (GO:0051954)	21	3	1.14	+	2.64	0.123	1
regulation of intracellular estrogen receptor signaling pathway (GO:0033146)	35	5	1.89	+	2.64	0.0523	1
negative regulation of intracellular protein transport (GO:0090317)	35	5	1.89	+	2.64	0.0523	1
G1 phase (GO:0051318)	21	3	1.14	+	2.64	0.123	1
positive regulation of receptor signaling pathway via STAT (GO:1904894)	21	3	1.14	+	2.64	0.123	1
mitotic G1 phase (GO:0000080)	21	3	1.14	+	2.64	0.123	1
myeloid cell development (GO:0061515)	42	6	2.27	+	2.64	0.035	1
aminoglycan catabolic process (GO:0006026)	43	6	2.32	+	2.58	0.0382	1
regulation of centrosome cycle (GO:0046605)	43	6	2.32	+	2.58	0.0382	1
purine-containing compound catabolic process (GO:0072523)	43	6	2.32	+	2.58	0.0382	1
phosphatidic acid biosynthetic process (GO:0006654)	36	5	1.95	+	2.57	0.0572	1
gene silencing by RNA (GO:0031047)	72	10	3.89	+	2.57	0.009	1
positive regulation of cell cycle G2/M phase transition (GO:1902751)	29	4	1.57	+	2.55	0.0867	1
regulation of striated muscle contraction (GO:0006942)	58	8	3.14	+	2.55	0.0191	1
regulation of extracellular matrix organization (GO:1903053)	29	4	1.57	+	2.55	0.0867	1
transcription by RNA polymerase III (GO:0006383)	29	4	1.57	+	2.55	0.0867	1
mitochondrial ATP synthesis coupled electron transport (GO:0042775)	73	10	3.95	+	2.53	0.00977	1
transcription preinitiation complex assembly (GO:0070897)	22	3	1.19	+	2.52	0.134	1
homeostasis of number of cells within a tissue (GO:0048873)	22	3	1.19	+	2.52	0.134	1
regulation of superoxide metabolic process (GO:0090322)	22	3	1.19	+	2.52	0.134	1
cellular response to interleukin-7 (GO:0098761)	22	3	1.19	+	2.52	0.134	1
response to interleukin-7 (GO:0098760)	22	3	1.19	+	2.52	0.134	1
erythrocyte differentiation (GO:0030218)	66	9	3.57	+	2.52	0.0142	1
vesicle docking (GO:0048278)	59	8	3.19	+	2.51	0.0208	1
ATP synthesis coupled electron transport (GO:0042773)	74	10	4	+	2.5	0.0106	1
somatic diversification of immune receptors via somatic mutation (GO:0002566)	15	2	0.81	+	2.47	0.216	1
negative regulation of T-helper cell differentiation (GO:0045623)	15	2	0.81	+	2.47	0.216	1
long-term synaptic depression (GO:0060292)	15	2	0.81	+	2.47	0.216	1
definitive hemopoiesis (GO:0060216)	15	2	0.81	+	2.47	0.216	1
regulation of superoxide anion generation (GO:0032928)	15	2	0.81	+	2.47	0.216	1
positive regulation of transforming growth factor beta production (GO:0071636)	15	2	0.81	+	2.47	0.216	1
modulation by host of viral genome replication (GO:0044827)	15	2	0.81	+	2.47	0.216	1
integrated stress response signaling (GO:0140467)	15	2	0.81	+	2.47	0.216	1
N-glycan processing (GO:0006491)	15	2	0.81	+	2.47	0.216	1
osteoblast development (GO:0002076)	15	2	0.81	+	2.47	0.216	1
positive regulation of viral release from host cell (GO:1902188)	15	2	0.81	+	2.47	0.216	1
cellular response to glucagon stimulus (GO:0071377)	15	2	0.81	+	2.47	0.216	1
regulation of renal system process (GO:0098801)	15	2	0.81	+	2.47	0.216	1
regulation of lipopolysaccharide-mediated signaling pathway (GO:0031664)	15	2	0.81	+	2.47	0.216	1
postsynaptic specialization organization (GO:0099084)	15	2	0.81	+	2.47	0.216	1
positive regulation of mitochondrial translation (GO:0070131)	15	2	0.81	+	2.47	0.216	1
positive T cell selection (GO:0043368)	15	2	0.81	+	2.47	0.216	1
DNA damage response, signal transduction resulting in transcription (GO:0042772)	15	2	0.81	+	2.47	0.216	1
purine ribonucleoside triphosphate biosynthetic process (GO:0009206)	30	4	1.62	+	2.47	0.0944	1
deoxyribonucleoside triphosphate metabolic process (GO:0009200)	15	2	0.81	+	2.47	0.216	1
serine family amino acid biosynthetic process (GO:0009070)	15	2	0.81	+	2.47	0.216	1
DNA damage response, signal transduction by p53 class mediator (GO:0030330)	75	10	4.05	+	2.47	0.0115	1
negative regulation of blood circulation (GO:1903523)	15	2	0.81	+	2.47	0.216	1
cardiac muscle hypertrophy (GO:0003300)	15	2	0.81	+	2.47	0.216	1
labyrinthine layer morphogenesis (GO:0060713)	15	2	0.81	+	2.47	0.216	1
striated muscle hypertrophy (GO:0014897)	15	2	0.81	+	2.47	0.216	1
negative regulation of intracellular transport (GO:0032387)	45	6	2.43	+	2.47	0.0452	1
synaptic vesicle exocytosis (GO:0016079)	45	6	2.43	+	2.47	0.0452	1
negative regulation of G0 to G1 transition (GO:0070317)	38	5	2.05	+	2.43	0.0676	1
phosphatidic acid metabolic process (GO:0046473)	38	5	2.05	+	2.43	0.0676	1
glutamate secretion (GO:0014047)	23	3	1.24	+	2.41	0.146	1
response to ATP (GO:0033198)	23	3	1.24	+	2.41	0.146	1
regulation of histone H3-K4 methylation (GO:0051569)	23	3	1.24	+	2.41	0.146	1
regulation of defense response to virus by virus (GO:0050690)	23	3	1.24	+	2.41	0.146	1
drug metabolic process (GO:0017144)	23	3	1.24	+	2.41	0.146	1
histone mRNA metabolic process (GO:0008334)	23	3	1.24	+	2.41	0.146	1
positive regulation of translational initiation (GO:0045948)	23	3	1.24	+	2.41	0.146	1
positive regulation of fatty acid metabolic process (GO:0045923)	23	3	1.24	+	2.41	0.146	1
double-strand break repair via homologous recombination (GO:0000724)	93	12	5.03	+	2.39	0.0113	1
purine nucleoside triphosphate biosynthetic process (GO:0009145)	31	4	1.68	+	2.39	0.103	1
regulation of phospholipid metabolic process (GO:1903725)	31	4	1.68	+	2.39	0.103	1
signal transduction involved in DNA damage checkpoint (GO:0072422)	70	9	3.78	+	2.38	0.0195	1
signal transduction involved in DNA integrity checkpoint (GO:0072401)	70	9	3.78	+	2.38	0.0195	1
DNA-templated transcription, termination (GO:0006353)	70	9	3.78	+	2.38	0.0195	1
vesicle docking involved in exocytosis (GO:0006904)	39	5	2.11	+	2.37	0.0733	1
purine nucleotide catabolic process (GO:0006195)	39	5	2.11	+	2.37	0.0733	1
regulation of centrosome duplication (GO:0010824)	39	5	2.11	+	2.37	0.0733	1
double-strand break repair via nonhomologous end joining (GO:0006303)	55	7	2.97	+	2.35	0.0387	1
cellular respiration (GO:0045333)	134	17	7.24	+	2.35	0.00224	1
cellular response to amino acid starvation (GO:0034198)	71	9	3.84	+	2.34	0.021	1
positive regulation of cell cycle arrest (GO:0071158)	79	10	4.27	+	2.34	0.0246	1
homeostasis of number of cells (GO:0048872)	166	21	8.97	+	2.34	0.000662	1
recombinational repair (GO:0000725)	95	12	5.14	+	2.34	0.0121	1
protein hexamerization (GO:0034214)	8	1	0.43	+	2.31	0.378	1
establishment or maintenance of transmembrane electrochemical gradient (GO:0010248)	8	1	0.43	+	2.31	0.378	1
negative regulation of immunoglobulin production (GO:0002638)	8	1	0.43	+	2.31	0.378	1
negative regulation of bone resorption (GO:0045779)	8	1	0.43	+	2.31	0.378	1
multi-ciliated epithelial cell differentiation (GO:1903251)	8	1	0.43	+	2.31	0.378	1
midgut development (GO:0007494)	8	1	0.43	+	2.31	0.378	1
positive regulation of systemic arterial blood pressure (GO:0003084)	8	1	0.43	+	2.31	0.378	1
regulation of systemic arterial blood pressure by renin-angiotensin (GO:0003081)	8	1	0.43	+	2.31	0.378	1
positive regulation of digestive system process (GO:0060456)	8	1	0.43	+	2.31	0.378	1
purine ribonucleoside catabolic process (GO:0046130)	8	1	0.43	+	2.31	0.378	1
DNA damage response, signal transduction by p53 class mediator resulting in cell cycle arrest (GO:0006977)	56	7	3.03	+	2.31	0.0417	1
positive regulation of toll-like receptor 4 signaling pathway (GO:0034145)	8	1	0.43	+	2.31	0.378	1
galactose catabolic process (GO:0019388)	8	1	0.43	+	2.31	0.378	1
signal transduction involved in cell cycle checkpoint (GO:0072395)	72	9	3.89	+	2.31	0.0365	1
tripartite regional subdivision (GO:0007351)	8	1	0.43	+	2.31	0.378	1
regulation of corticosteroid hormone secretion (GO:2000846)	8	1	0.43	+	2.31	0.378	1
positive regulation of ryanodine-sensitive calcium-release channel activity (GO:0060316)	8	1	0.43	+	2.31	0.378	1
cellular sodium ion homeostasis (GO:0006883)	8	1	0.43	+	2.31	0.378	1
subpallium development (GO:0021544)	16	2	0.87	+	2.31	0.235	1
lymphangiogenesis (GO:0001946)	8	1	0.43	+	2.31	0.378	1
spinal cord dorsal/ventral patterning (GO:0021513)	8	1	0.43	+	2.31	0.378	1
regulation of endocytic recycling (GO:2001135)	8	1	0.43	+	2.31	0.378	1
positive regulation of early endosome to late endosome transport (GO:2000643)	8	1	0.43	+	2.31	0.378	1
platelet dense granule organization (GO:0060155)	8	1	0.43	+	2.31	0.378	1
auditory receptor cell development (GO:0060117)	16	2	0.87	+	2.31	0.235	1
diacylglycerol biosynthetic process (GO:0006651)	8	1	0.43	+	2.31	0.378	1
formation of cytoplasmic translation initiation complex (GO:0001732)	16	2	0.87	+	2.31	0.235	1
tubulin complex assembly (GO:0007021)	8	1	0.43	+	2.31	0.378	1
positive regulation by host of viral genome replication (GO:0044829)	8	1	0.43	+	2.31	0.378	1
mitotic G1/S transition checkpoint (GO:0044819)	64	8	3.46	+	2.31	0.0306	1
regulation of natural killer cell differentiation (GO:0032823)	8	1	0.43	+	2.31	0.378	1
L-serine metabolic process (GO:0006563)	8	1	0.43	+	2.31	0.378	1
positive regulation of synaptic transmission, glutamatergic (GO:0051968)	16	2	0.87	+	2.31	0.235	1
negative regulation by host of viral process (GO:0044793)	8	1	0.43	+	2.31	0.378	1
ribosome disassembly (GO:0032790)	8	1	0.43	+	2.31	0.378	1
cellular response to laminar fluid shear stress (GO:0071499)	8	1	0.43	+	2.31	0.378	1
translational readthrough (GO:0006451)	8	1	0.43	+	2.31	0.378	1
tRNA wobble uridine modification (GO:0002098)	16	2	0.87	+	2.31	0.235	1
regulation of neuron maturation (GO:0014041)	8	1	0.43	+	2.31	0.378	1
neural crest formation (GO:0014029)	8	1	0.43	+	2.31	0.378	1
development of secondary sexual characteristics (GO:0045136)	8	1	0.43	+	2.31	0.378	1
regulation of histone deacetylase activity (GO:1901725)	8	1	0.43	+	2.31	0.378	1
mitochondrial tRNA modification (GO:0070900)	8	1	0.43	+	2.31	0.378	1
selenocysteine incorporation (GO:0001514)	8	1	0.43	+	2.31	0.378	1
T-helper 1 cell differentiation (GO:0045063)	8	1	0.43	+	2.31	0.378	1
stress-induced premature senescence (GO:0090400)	8	1	0.43	+	2.31	0.378	1
cardiac muscle cell membrane repolarization (GO:0099622)	8	1	0.43	+	2.31	0.378	1
positive regulation of phosphoprotein phosphatase activity (GO:0032516)	16	2	0.87	+	2.31	0.235	1
mitochondrial RNA processing (GO:0000963)	16	2	0.87	+	2.31	0.235	1
pyrimidine nucleobase metabolic process (GO:0006206)	16	2	0.87	+	2.31	0.235	1
endoplasmic reticulum localization (GO:0051643)	8	1	0.43	+	2.31	0.378	1
regulation of mitophagy (GO:1901524)	8	1	0.43	+	2.31	0.378	1
histone H3-K27 methylation (GO:0070734)	8	1	0.43	+	2.31	0.378	1
postsynapse to nucleus signaling pathway (GO:0099527)	8	1	0.43	+	2.31	0.378	1
negative regulation of leukocyte apoptotic process (GO:2000107)	32	4	1.73	+	2.31	0.111	1
regulation of growth rate (GO:0040009)	8	1	0.43	+	2.31	0.378	1
purine nucleoside catabolic process (GO:0006152)	8	1	0.43	+	2.31	0.378	1
histone H4-K8 acetylation (GO:0043982)	16	2	0.87	+	2.31	0.235	1
histone H4-K5 acetylation (GO:0043981)	16	2	0.87	+	2.31	0.235	1
positive regulation of histone H3-K9 methylation (GO:0051574)	8	1	0.43	+	2.31	0.378	1
oxaloacetate metabolic process (GO:0006107)	8	1	0.43	+	2.31	0.378	1
response to interleukin-18 (GO:0070673)	8	1	0.43	+	2.31	0.378	1
regulation of metaphase plate congression (GO:0090235)	8	1	0.43	+	2.31	0.378	1
positive regulation of astrocyte differentiation (GO:0048711)	8	1	0.43	+	2.31	0.378	1
embryonic neurocranium morphogenesis (GO:0048702)	8	1	0.43	+	2.31	0.378	1
glycerol-3-phosphate metabolic process (GO:0006072)	8	1	0.43	+	2.31	0.378	1
DNA catabolic process, exonucleolytic (GO:0000738)	8	1	0.43	+	2.31	0.378	1
positive regulation of meiotic cell cycle (GO:0051446)	16	2	0.87	+	2.31	0.235	1
cellular response to insulin-like growth factor stimulus (GO:1990314)	8	1	0.43	+	2.31	0.378	1
response to nitrosative stress (GO:0051409)	8	1	0.43	+	2.31	0.378	1
positive regulation of neuron projection regeneration (GO:0070572)	8	1	0.43	+	2.31	0.378	1
positive regulation of axon regeneration (GO:0048680)	8	1	0.43	+	2.31	0.378	1
mitochondrial RNA modification (GO:1900864)	8	1	0.43	+	2.31	0.378	1
negative regulation of adenylate cyclase-activating G protein-coupled receptor signaling pathway (GO:0106072)	8	1	0.43	+	2.31	0.378	1
secretory granule localization (GO:0032252)	8	1	0.43	+	2.31	0.378	1
regulation of protein localization to chromatin (GO:1905634)	8	1	0.43	+	2.31	0.378	1
relaxation of muscle (GO:0090075)	16	2	0.87	+	2.31	0.235	1
positive regulation of deacetylase activity (GO:0090045)	8	1	0.43	+	2.31	0.378	1
regulation of B cell receptor signaling pathway (GO:0050855)	16	2	0.87	+	2.31	0.235	1
negative regulation of calcium-mediated signaling (GO:0050849)	16	2	0.87	+	2.31	0.235	1
bone marrow development (GO:0048539)	8	1	0.43	+	2.31	0.378	1
polyadenylation-dependent RNA catabolic process (GO:0043633)	8	1	0.43	+	2.31	0.378	1
replication fork protection (GO:0048478)	8	1	0.43	+	2.31	0.378	1
regulation of translation in response to endoplasmic reticulum stress (GO:0036490)	8	1	0.43	+	2.31	0.378	1
regulation of DNA methylation (GO:0044030)	16	2	0.87	+	2.31	0.235	1
box C/D snoRNP assembly (GO:0000492)	8	1	0.43	+	2.31	0.378	1
positive regulation of fatty acid beta-oxidation (GO:0032000)	8	1	0.43	+	2.31	0.378	1
postsynaptic specialization assembly (GO:0098698)	8	1	0.43	+	2.31	0.378	1
mitotic G1 DNA damage checkpoint (GO:0031571)	64	8	3.46	+	2.31	0.0306	1
regulation of relaxation of muscle (GO:1901077)	8	1	0.43	+	2.31	0.378	1
negative regulation of retinoic acid receptor signaling pathway (GO:0048387)	8	1	0.43	+	2.31	0.378	1
hydrogen peroxide biosynthetic process (GO:0050665)	8	1	0.43	+	2.31	0.378	1
negative regulation of T cell apoptotic process (GO:0070233)	16	2	0.87	+	2.31	0.235	1
histone H2A-K119 monoubiquitination (GO:0036353)	8	1	0.43	+	2.31	0.378	1
negative regulation of lipid biosynthetic process (GO:0051055)	40	5	2.16	+	2.31	0.0791	1
protein localization to chromosome, telomeric region (GO:0070198)	16	2	0.87	+	2.31	0.235	1
tRNA aminoacylation for mitochondrial protein translation (GO:0070127)	8	1	0.43	+	2.31	0.378	1
positive regulation of vesicle fusion (GO:0031340)	8	1	0.43	+	2.31	0.378	1
positive regulation of RNA binding (GO:1905216)	8	1	0.43	+	2.31	0.378	1
regulation of protein localization to cell cortex (GO:1904776)	8	1	0.43	+	2.31	0.378	1
regulation of protein localization to nucleolus (GO:1904749)	8	1	0.43	+	2.31	0.378	1
positive regulation of actin filament depolymerization (GO:0030836)	8	1	0.43	+	2.31	0.378	1
entry of bacterium into host cell (GO:0035635)	8	1	0.43	+	2.31	0.378	1
tRNA transcription (GO:0009304)	8	1	0.43	+	2.31	0.378	1
tRNA 3'-end processing (GO:0042780)	8	1	0.43	+	2.31	0.378	1
regulation of transcription involved in G1/S transition of mitotic cell cycle (GO:0000083)	32	4	1.73	+	2.31	0.111	1
regulation of SNARE complex assembly (GO:0035542)	8	1	0.43	+	2.31	0.378	1
surfactant homeostasis (GO:0043129)	8	1	0.43	+	2.31	0.378	1
chromatin remodeling at centromere (GO:0031055)	32	4	1.73	+	2.31	0.111	1
peptidyl-lysine deacetylation (GO:0034983)	8	1	0.43	+	2.31	0.378	1
histone arginine methylation (GO:0034969)	8	1	0.43	+	2.31	0.378	1
superoxide anion generation (GO:0042554)	8	1	0.43	+	2.31	0.378	1
regulation of amino acid import across plasma membrane (GO:0010958)	8	1	0.43	+	2.31	0.378	1
chaperone-mediated autophagy (GO:0061684)	8	1	0.43	+	2.31	0.378	1
membrane repolarization during cardiac muscle cell action potential (GO:0086013)	8	1	0.43	+	2.31	0.378	1
membrane repolarization during action potential (GO:0086011)	8	1	0.43	+	2.31	0.378	1
regulation of protein catabolic process in the vacuole (GO:1904350)	8	1	0.43	+	2.31	0.378	1
progesterone metabolic process (GO:0042448)	8	1	0.43	+	2.31	0.378	1
anterior/posterior axis specification, embryo (GO:0008595)	8	1	0.43	+	2.31	0.378	1
positive regulation of myotube differentiation (GO:0010831)	8	1	0.43	+	2.31	0.378	1
positive regulation of voltage-gated potassium channel activity (GO:1903818)	8	1	0.43	+	2.31	0.378	1
gas transport (GO:0015669)	8	1	0.43	+	2.31	0.378	1
muscle cell cellular homeostasis (GO:0046716)	16	2	0.87	+	2.31	0.235	1
positive regulation of TORC1 signaling (GO:1904263)	16	2	0.87	+	2.31	0.235	1
rRNA catabolic process (GO:0016075)	16	2	0.87	+	2.31	0.235	1
regulation of amino acid transmembrane transport (GO:1903789)	8	1	0.43	+	2.31	0.378	1
regulation of gamma-delta T cell activation (GO:0046643)	8	1	0.43	+	2.31	0.378	1
regulation of DNA-dependent DNA replication initiation (GO:0030174)	8	1	0.43	+	2.31	0.378	1
RNA secondary structure unwinding (GO:0010501)	8	1	0.43	+	2.31	0.378	1
positive regulation of inositol phosphate biosynthetic process (GO:0060732)	8	1	0.43	+	2.31	0.378	1
muscle hypertrophy (GO:0014896)	16	2	0.87	+	2.31	0.235	1
response to muscle inactivity (GO:0014870)	8	1	0.43	+	2.31	0.378	1
positive regulation of striated muscle contraction (GO:0045989)	8	1	0.43	+	2.31	0.378	1
protein maturation by protein folding (GO:0022417)	8	1	0.43	+	2.31	0.378	1
response to acidic pH (GO:0010447)	16	2	0.87	+	2.31	0.235	1
negative regulation of type 2 immune response (GO:0002829)	8	1	0.43	+	2.31	0.378	1
positive regulation of T-helper 1 type immune response (GO:0002827)	8	1	0.43	+	2.31	0.378	1
cellular potassium ion homeostasis (GO:0030007)	8	1	0.43	+	2.31	0.378	1
negative regulation of insulin secretion involved in cellular response to glucose stimulus (GO:0061179)	8	1	0.43	+	2.31	0.378	1
protein localization to ciliary membrane (GO:1903441)	8	1	0.43	+	2.31	0.378	1
rostrocaudal neural tube patterning (GO:0021903)	8	1	0.43	+	2.31	0.378	1
phototransduction, visible light (GO:0007603)	8	1	0.43	+	2.31	0.378	1
negative regulation of cell growth involved in cardiac muscle cell development (GO:0061052)	8	1	0.43	+	2.31	0.378	1
protein localization to Golgi apparatus (GO:0034067)	24	3	1.3	+	2.31	0.159	1
regulation of activated T cell proliferation (GO:0046006)	24	3	1.3	+	2.31	0.159	1
G protein-coupled receptor signaling pathway, coupled to cyclic nucleotide second messenger (GO:0007187)	24	3	1.3	+	2.31	0.159	1
regulation of protein sumoylation (GO:0033233)	24	3	1.3	+	2.31	0.159	1
protein hydroxylation (GO:0018126)	24	3	1.3	+	2.31	0.159	1
signal transduction in response to DNA damage (GO:0042770)	96	12	5.19	+	2.31	0.0126	1
respiratory chain complex IV assembly (GO:0008535)	24	3	1.3	+	2.31	0.159	1
positive regulation of lamellipodium assembly (GO:0010592)	24	3	1.3	+	2.31	0.159	1
phosphatidylglycerol metabolic process (GO:0046471)	24	3	1.3	+	2.31	0.159	1
cell differentiation involved in embryonic placenta development (GO:0060706)	24	3	1.3	+	2.31	0.159	1
regulation of mesenchymal cell proliferation (GO:0010464)	24	3	1.3	+	2.31	0.159	1
proton transmembrane transport (GO:1902600)	89	11	4.81	+	2.29	0.0184	1
G1 DNA damage checkpoint (GO:0044783)	65	8	3.51	+	2.28	0.0329	1
signal transduction involved in mitotic G1 DNA damage checkpoint (GO:0072431)	57	7	3.08	+	2.27	0.0448	1
signal transduction involved in mitotic DNA integrity checkpoint (GO:1902403)	57	7	3.08	+	2.27	0.0448	1
signal transduction involved in mitotic DNA damage checkpoint (GO:1902402)	57	7	3.08	+	2.27	0.0448	1
intracellular signal transduction involved in G1 DNA damage checkpoint (GO:1902400)	57	7	3.08	+	2.27	0.0448	1
nuclear DNA replication (GO:0033260)	57	7	3.08	+	2.27	0.0448	1
negative regulation of protein dephosphorylation (GO:0035308)	49	6	2.65	+	2.26	0.0615	1
electron transport chain (GO:0022900)	139	17	7.52	+	2.26	0.00295	1
blastocyst development (GO:0001824)	82	10	4.43	+	2.26	0.027	1
RNA phosphodiester bond hydrolysis, exonucleolytic (GO:0090503)	41	5	2.22	+	2.26	0.0852	1
glycosaminoglycan catabolic process (GO:0006027)	41	5	2.22	+	2.26	0.0852	1
positive regulation of potassium ion transport (GO:0043268)	41	5	2.22	+	2.26	0.0852	1
response to amino acid starvation (GO:1990928)	74	9	4	+	2.25	0.0385	1
granulocyte chemotaxis (GO:0071621)	33	4	1.78	+	2.24	0.12	1
positive regulation of RNA splicing (GO:0033120)	33	4	1.78	+	2.24	0.12	1
7-methylguanosine mRNA capping (GO:0006370)	33	4	1.78	+	2.24	0.12	1
lysosome organization (GO:0007040)	58	7	3.14	+	2.23	0.0481	1
cell cycle DNA replication (GO:0044786)	58	7	3.14	+	2.23	0.0481	1
cell aging (GO:0007569)	58	7	3.14	+	2.23	0.0481	1
lytic vacuole organization (GO:0080171)	58	7	3.14	+	2.23	0.0481	1
regulation of natural killer cell activation (GO:0032814)	25	3	1.35	+	2.22	0.171	1
cellular response to gamma radiation (GO:0071480)	25	3	1.35	+	2.22	0.171	1
modulation by host of symbiont process (GO:0051851)	50	6	2.7	+	2.22	0.066	1
cellular response to estradiol stimulus (GO:0071392)	25	3	1.35	+	2.22	0.171	1
regulation of calcineurin-NFAT signaling cascade (GO:0070884)	25	3	1.35	+	2.22	0.171	1
vesicle-mediated transport between endosomal compartments (GO:0098927)	25	3	1.35	+	2.22	0.171	1
heterochromatin assembly (GO:0031507)	25	3	1.35	+	2.22	0.171	1
negative regulation of protein localization to nucleus (GO:1900181)	25	3	1.35	+	2.22	0.171	1
response to copper ion (GO:0046688)	25	3	1.35	+	2.22	0.171	1
autophagosome maturation (GO:0097352)	25	3	1.35	+	2.22	0.171	1
positive regulation of mitotic cell cycle (GO:0045931)	100	12	5.41	+	2.22	0.0149	1
gene silencing (GO:0016458)	109	13	5.89	+	2.21	0.0113	1
DNA-dependent DNA replication maintenance of fidelity (GO:0045005)	42	5	2.27	+	2.2	0.0915	1
regulation of G0 to G1 transition (GO:0070316)	42	5	2.27	+	2.2	0.0915	1
RNA stabilization (GO:0043489)	42	5	2.27	+	2.2	0.0915	1
purine ribonucleoside triphosphate metabolic process (GO:0009205)	42	5	2.27	+	2.2	0.0915	1
monosaccharide biosynthetic process (GO:0046364)	42	5	2.27	+	2.2	0.0915	1
signal transduction involved in mitotic cell cycle checkpoint (GO:0072413)	59	7	3.19	+	2.19	0.0822	1
purine ribonucleoside biosynthetic process (GO:0046129)	17	2	0.92	+	2.18	0.255	1
positive regulation of extracellular matrix organization (GO:1903055)	17	2	0.92	+	2.18	0.255	1
regulation of fatty acid metabolic process (GO:0019217)	68	8	3.68	+	2.18	0.0585	1
lymph vessel development (GO:0001945)	17	2	0.92	+	2.18	0.255	1
icosanoid transport (GO:0071715)	17	2	0.92	+	2.18	0.255	1
protein-DNA complex disassembly (GO:0032986)	17	2	0.92	+	2.18	0.255	1
positive regulation of stem cell proliferation (GO:2000648)	17	2	0.92	+	2.18	0.255	1
gastrulation with mouth forming second (GO:0001702)	17	2	0.92	+	2.18	0.255	1
negative regulation of chemokine production (GO:0032682)	17	2	0.92	+	2.18	0.255	1
termination of RNA polymerase II transcription (GO:0006369)	34	4	1.84	+	2.18	0.129	1
positive regulation of neurotransmitter transport (GO:0051590)	17	2	0.92	+	2.18	0.255	1
histone H2A acetylation (GO:0043968)	17	2	0.92	+	2.18	0.255	1
positive regulation of nitric-oxide synthase activity (GO:0051000)	17	2	0.92	+	2.18	0.255	1
RNA capping (GO:0036260)	34	4	1.84	+	2.18	0.129	1
7-methylguanosine RNA capping (GO:0009452)	34	4	1.84	+	2.18	0.129	1
positive regulation of leukocyte degranulation (GO:0043302)	17	2	0.92	+	2.18	0.255	1
midbody abscission (GO:0061952)	17	2	0.92	+	2.18	0.255	1
ribonucleoside biosynthetic process (GO:0042455)	17	2	0.92	+	2.18	0.255	1
purine nucleoside biosynthetic process (GO:0042451)	17	2	0.92	+	2.18	0.255	1
regulation of cardiac conduction (GO:1903779)	34	4	1.84	+	2.18	0.129	1
vesicle transport along actin filament (GO:0030050)	17	2	0.92	+	2.18	0.255	1
lactation (GO:0007595)	34	4	1.84	+	2.18	0.129	1
organelle fusion (GO:0048284)	94	11	5.08	+	2.16	0.0226	1
non-recombinational repair (GO:0000726)	60	7	3.24	+	2.16	0.0842	1
energy derivation by oxidation of organic compounds (GO:0015980)	189	22	10.22	+	2.15	0.00142	1
positive regulation of cation channel activity (GO:2001259)	43	5	2.32	+	2.15	0.0981	1
DNA replication initiation (GO:0006270)	43	5	2.32	+	2.15	0.0981	1
double-strand break repair (GO:0006302)	181	21	9.79	+	2.15	0.00192	1
protein N-linked glycosylation (GO:0006487)	69	8	3.73	+	2.14	0.0603	1
positive regulation of glial cell differentiation (GO:0045687)	26	3	1.41	+	2.13	0.184	1
heme biosynthetic process (GO:0006783)	26	3	1.41	+	2.13	0.184	1
NADP metabolic process (GO:0006739)	26	3	1.41	+	2.13	0.184	1
positive regulation of DNA-templated transcription, elongation (GO:0032786)	26	3	1.41	+	2.13	0.184	1
intracellular transport of virus (GO:0075733)	52	6	2.81	+	2.13	0.123	1
protein N-linked glycosylation via asparagine (GO:0018279)	26	3	1.41	+	2.13	0.184	1
regulation of calcineurin-mediated signaling (GO:0106056)	26	3	1.41	+	2.13	0.184	1
positive regulation of release of sequestered calcium ion into cytosol (GO:0051281)	26	3	1.41	+	2.13	0.184	1
positive regulation of viral transcription (GO:0050434)	26	3	1.41	+	2.13	0.184	1
glucose transmembrane transport (GO:1904659)	26	3	1.41	+	2.13	0.184	1
purinergic nucleotide receptor signaling pathway (GO:0035590)	26	3	1.41	+	2.13	0.184	1
regulation of fatty acid oxidation (GO:0046320)	26	3	1.41	+	2.13	0.184	1
response to UV (GO:0009411)	131	15	7.08	+	2.12	0.0119	1
regulation of intracellular steroid hormone receptor signaling pathway (GO:0033143)	70	8	3.78	+	2.11	0.0623	1
mRNA stabilization (GO:0048255)	35	4	1.89	+	2.11	0.138	1
positive regulation of substrate adhesion-dependent cell spreading (GO:1900026)	35	4	1.89	+	2.11	0.138	1
generation of precursor metabolites and energy (GO:0006091)	316	36	17.08	+	2.11	7.21e-05	1
cellular response to nerve growth factor stimulus (GO:1990090)	44	5	2.38	+	2.1	0.105	1
response to nerve growth factor (GO:1990089)	44	5	2.38	+	2.1	0.105	1
post-transcriptional gene silencing by RNA (GO:0035194)	53	6	2.87	+	2.09	0.125	1
regulation of wound healing (GO:0061041)	89	10	4.81	+	2.08	0.0357	1
response to estradiol (GO:0032355)	98	11	5.3	+	2.08	0.0271	1
regulation of gene expression, epigenetic (GO:0040029)	125	14	6.76	+	2.07	0.0175	1
bronchus development (GO:0060433)	9	1	0.49	+	2.06	0.409	1
regulation of T-helper cell differentiation (GO:0045622)	27	3	1.46	+	2.06	0.198	1
regulation of cell-cell adhesion mediated by integrin (GO:0033632)	9	1	0.49	+	2.06	0.409	1
negative regulation of cell adhesion mediated by integrin (GO:0033629)	9	1	0.49	+	2.06	0.409	1
hexose biosynthetic process (GO:0019319)	36	4	1.95	+	2.06	0.147	1
negative regulation of ryanodine-sensitive calcium-release channel activity (GO:0060315)	9	1	0.49	+	2.06	0.409	1
purine ribonucleoside bisphosphate metabolic process (GO:0034035)	18	2	0.97	+	2.06	0.274	1
plasma lipoprotein particle organization (GO:0071827)	27	3	1.46	+	2.06	0.198	1
regulation of mammary gland epithelial cell proliferation (GO:0033599)	18	2	0.97	+	2.06	0.274	1
mammary gland epithelial cell proliferation (GO:0033598)	9	1	0.49	+	2.06	0.409	1
sensory perception of pain (GO:0019233)	36	4	1.95	+	2.06	0.147	1
dorsal spinal cord development (GO:0021516)	9	1	0.49	+	2.06	0.409	1
spinal cord patterning (GO:0021511)	9	1	0.49	+	2.06	0.409	1
biotin metabolic process (GO:0006768)	9	1	0.49	+	2.06	0.409	1
male meiotic nuclear division (GO:0007140)	27	3	1.46	+	2.06	0.198	1
secretion by tissue (GO:0032941)	9	1	0.49	+	2.06	0.409	1
regulation of histone H3-K9 acetylation (GO:2000615)	9	1	0.49	+	2.06	0.409	1
regulation of activin receptor signaling pathway (GO:0032925)	18	2	0.97	+	2.06	0.274	1
TORC1 signaling (GO:0038202)	9	1	0.49	+	2.06	0.409	1
regulation of mRNA binding (GO:1902415)	9	1	0.49	+	2.06	0.409	1
membrane raft assembly (GO:0001765)	9	1	0.49	+	2.06	0.409	1
formation of translation preinitiation complex (GO:0001731)	9	1	0.49	+	2.06	0.409	1
cytoplasm organization (GO:0007028)	9	1	0.49	+	2.06	0.409	1
reflex (GO:0060004)	9	1	0.49	+	2.06	0.409	1
L-phenylalanine catabolic process (GO:0006559)	9	1	0.49	+	2.06	0.409	1
L-phenylalanine metabolic process (GO:0006558)	9	1	0.49	+	2.06	0.409	1
positive regulation of sodium ion transmembrane transport (GO:1902307)	18	2	0.97	+	2.06	0.274	1
L-glutamate import (GO:0051938)	9	1	0.49	+	2.06	0.409	1
telomeric loop disassembly (GO:0090657)	9	1	0.49	+	2.06	0.409	1
negative regulation of lymphocyte migration (GO:2000402)	9	1	0.49	+	2.06	0.409	1
erythrose 4-phosphate/phosphoenolpyruvate family amino acid catabolic process (GO:1902222)	9	1	0.49	+	2.06	0.409	1
erythrose 4-phosphate/phosphoenolpyruvate family amino acid metabolic process (GO:1902221)	9	1	0.49	+	2.06	0.409	1
response to isoquinoline alkaloid (GO:0014072)	18	2	0.97	+	2.06	0.274	1
cellular hyperosmotic response (GO:0071474)	9	1	0.49	+	2.06	0.409	1
tRNA aminoacylation for protein translation (GO:0006418)	45	5	2.43	+	2.06	0.112	1
lipid export from cell (GO:0140353)	27	3	1.46	+	2.06	0.198	1
small RNA loading onto RISC (GO:0070922)	9	1	0.49	+	2.06	0.409	1
negative regulation of interleukin-10 production (GO:0032693)	9	1	0.49	+	2.06	0.409	1
positive regulation of ceramide biosynthetic process (GO:2000304)	9	1	0.49	+	2.06	0.409	1
response to host defenses (GO:0052200)	9	1	0.49	+	2.06	0.409	1
cellular response to fatty acid (GO:0071398)	27	3	1.46	+	2.06	0.198	1
cellular response to dsRNA (GO:0071359)	18	2	0.97	+	2.06	0.274	1
mitotic recombination (GO:0006312)	18	2	0.97	+	2.06	0.274	1
regulation of mitotic spindle assembly (GO:1901673)	18	2	0.97	+	2.06	0.274	1
protein localization to nuclear envelope (GO:0090435)	9	1	0.49	+	2.06	0.409	1
positive regulation of mast cell activation involved in immune response (GO:0033008)	9	1	0.49	+	2.06	0.409	1
heterochromatin organization (GO:0070828)	36	4	1.95	+	2.06	0.147	1
phosphorylation of RNA polymerase II C-terminal domain (GO:0070816)	9	1	0.49	+	2.06	0.409	1
response to defenses of other organism (GO:0052173)	9	1	0.49	+	2.06	0.409	1
long-chain fatty acid import into cell (GO:0044539)	9	1	0.49	+	2.06	0.409	1
pyrimidine dimer repair (GO:0006290)	9	1	0.49	+	2.06	0.409	1
negative regulation of phosphoprotein phosphatase activity (GO:0032515)	45	5	2.43	+	2.06	0.112	1
peptidyl-asparagine modification (GO:0018196)	27	3	1.46	+	2.06	0.198	1
cAMP catabolic process (GO:0006198)	9	1	0.49	+	2.06	0.409	1
IMP biosynthetic process (GO:0006188)	9	1	0.49	+	2.06	0.409	1
regulation of postsynaptic density organization (GO:1905874)	9	1	0.49	+	2.06	0.409	1
cellular component maintenance (GO:0043954)	45	5	2.43	+	2.06	0.112	1
pigment granule maturation (GO:0048757)	9	1	0.49	+	2.06	0.409	1
positive regulation of cell-cell adhesion mediated by cadherin (GO:2000049)	9	1	0.49	+	2.06	0.409	1
serine transport (GO:0032329)	9	1	0.49	+	2.06	0.409	1
mannose metabolic process (GO:0006013)	9	1	0.49	+	2.06	0.409	1
response to corticosterone (GO:0051412)	9	1	0.49	+	2.06	0.409	1
positive regulation of kidney development (GO:0090184)	9	1	0.49	+	2.06	0.409	1
positive regulation of sphingolipid biosynthetic process (GO:0090154)	9	1	0.49	+	2.06	0.409	1
detection of calcium ion (GO:0005513)	9	1	0.49	+	2.06	0.409	1
regulation of synaptic transmission, GABAergic (GO:0032228)	18	2	0.97	+	2.06	0.274	1
response to mineralocorticoid (GO:0051385)	18	2	0.97	+	2.06	0.274	1
positive regulation of extracellular matrix assembly (GO:1901203)	9	1	0.49	+	2.06	0.409	1
regulation of steroid hormone biosynthetic process (GO:0090030)	9	1	0.49	+	2.06	0.409	1
activation of protein kinase B activity (GO:0032148)	27	3	1.46	+	2.06	0.198	1
regulation of response to nutrient levels (GO:0032107)	18	2	0.97	+	2.06	0.274	1
regulation of response to extracellular stimulus (GO:0032104)	18	2	0.97	+	2.06	0.274	1
nuclear pore complex assembly (GO:0051292)	9	1	0.49	+	2.06	0.409	1
L-glutamate import across plasma membrane (GO:0098712)	9	1	0.49	+	2.06	0.409	1
regulation of behavior (GO:0050795)	36	4	1.95	+	2.06	0.147	1
lens fiber cell development (GO:0070307)	9	1	0.49	+	2.06	0.409	1
bleb assembly (GO:0032060)	9	1	0.49	+	2.06	0.409	1
mitochondrial DNA metabolic process (GO:0032042)	9	1	0.49	+	2.06	0.409	1
regulation of ARF protein signal transduction (GO:0032012)	18	2	0.97	+	2.06	0.274	1
response to host (GO:0075136)	9	1	0.49	+	2.06	0.409	1
pyroptosis (GO:0070269)	9	1	0.49	+	2.06	0.409	1
homocysteine metabolic process (GO:0050667)	9	1	0.49	+	2.06	0.409	1
paraxial mesoderm morphogenesis (GO:0048340)	9	1	0.49	+	2.06	0.409	1
alternative mRNA splicing, via spliceosome (GO:0000380)	18	2	0.97	+	2.06	0.274	1
endosome to pigment granule transport (GO:0043485)	9	1	0.49	+	2.06	0.409	1
detection of other organism (GO:0098543)	9	1	0.49	+	2.06	0.409	1
regulation of excitatory synapse assembly (GO:1904889)	9	1	0.49	+	2.06	0.409	1
regulation of telomerase RNA localization to Cajal body (GO:1904872)	18	2	0.97	+	2.06	0.274	1
peptidyl-serine autophosphorylation (GO:0036289)	9	1	0.49	+	2.06	0.409	1
regulation of long-term synaptic depression (GO:1900452)	9	1	0.49	+	2.06	0.409	1
mitochondrial fission (GO:0000266)	18	2	0.97	+	2.06	0.274	1
CD4-positive, alpha-beta T cell lineage commitment (GO:0043373)	9	1	0.49	+	2.06	0.409	1
positive regulation of mast cell degranulation (GO:0043306)	9	1	0.49	+	2.06	0.409	1
regulation of neuronal synaptic plasticity (GO:0048168)	36	4	1.95	+	2.06	0.147	1
polarized epithelial cell differentiation (GO:0030859)	18	2	0.97	+	2.06	0.274	1
3'-phosphoadenosine 5'-phosphosulfate metabolic process (GO:0050427)	18	2	0.97	+	2.06	0.274	1
response to morphine (GO:0043278)	18	2	0.97	+	2.06	0.274	1
endosome to melanosome transport (GO:0035646)	9	1	0.49	+	2.06	0.409	1
locomotory exploration behavior (GO:0035641)	9	1	0.49	+	2.06	0.409	1
folic acid-containing compound biosynthetic process (GO:0009396)	9	1	0.49	+	2.06	0.409	1
positive regulation of pseudopodium assembly (GO:0031274)	9	1	0.49	+	2.06	0.409	1
oligosaccharide catabolic process (GO:0009313)	9	1	0.49	+	2.06	0.409	1
amine catabolic process (GO:0009310)	18	2	0.97	+	2.06	0.274	1
negative regulation of ubiquitin protein ligase activity (GO:1904667)	9	1	0.49	+	2.06	0.409	1
regulation of cytoplasmic translational elongation (GO:1900247)	9	1	0.49	+	2.06	0.409	1
ribonucleoside triphosphate biosynthetic process (GO:0009201)	36	4	1.95	+	2.06	0.147	1
positive regulation of receptor binding (GO:1900122)	9	1	0.49	+	2.06	0.409	1
regulation of histone H3-K9 trimethylation (GO:1900112)	9	1	0.49	+	2.06	0.409	1
phospholipid homeostasis (GO:0055091)	9	1	0.49	+	2.06	0.409	1
DNA methylation involved in gamete generation (GO:0043046)	9	1	0.49	+	2.06	0.409	1
neutrophil chemotaxis (GO:0030593)	27	3	1.46	+	2.06	0.198	1
positive regulation of protein processing (GO:0010954)	18	2	0.97	+	2.06	0.274	1
respiratory electron transport chain (GO:0022904)	90	10	4.87	+	2.06	0.0373	1
regulation of inositol phosphate biosynthetic process (GO:0010919)	9	1	0.49	+	2.06	0.409	1
regulation of phosphatidylcholine metabolic process (GO:0150172)	9	1	0.49	+	2.06	0.409	1
negative regulation of bone remodeling (GO:0046851)	9	1	0.49	+	2.06	0.409	1
membrane repolarization (GO:0086009)	9	1	0.49	+	2.06	0.409	1
cellular biogenic amine catabolic process (GO:0042402)	18	2	0.97	+	2.06	0.274	1
negative regulation of myotube differentiation (GO:0010832)	9	1	0.49	+	2.06	0.409	1
detection of bacterium (GO:0016045)	9	1	0.49	+	2.06	0.409	1
positive regulation of protein kinase A signaling (GO:0010739)	9	1	0.49	+	2.06	0.409	1
gene silencing by miRNA (GO:0035195)	45	5	2.43	+	2.06	0.112	1
cytoplasmic pattern recognition receptor signaling pathway in response to virus (GO:0039528)	9	1	0.49	+	2.06	0.409	1
regulation of cytoplasmic mRNA processing body assembly (GO:0010603)	9	1	0.49	+	2.06	0.409	1
regulation of centriole replication (GO:0046599)	18	2	0.97	+	2.06	0.274	1
intracellular mRNA localization (GO:0008298)	9	1	0.49	+	2.06	0.409	1
miRNA metabolic process (GO:0010586)	18	2	0.97	+	2.06	0.274	1
endothelial cell activation (GO:0042118)	9	1	0.49	+	2.06	0.409	1
positive regulation of smooth muscle cell migration (GO:0014911)	27	3	1.46	+	2.06	0.198	1
cardiac muscle hypertrophy in response to stress (GO:0014898)	9	1	0.49	+	2.06	0.409	1
cell migration involved in gastrulation (GO:0042074)	9	1	0.49	+	2.06	0.409	1
regulation of ribonuclease activity (GO:0060700)	9	1	0.49	+	2.06	0.409	1
cardiac muscle adaptation (GO:0014887)	9	1	0.49	+	2.06	0.409	1
response to stimulus involved in regulation of muscle adaptation (GO:0014874)	9	1	0.49	+	2.06	0.409	1
response to inactivity (GO:0014854)	9	1	0.49	+	2.06	0.409	1
positive regulation of type 2 immune response (GO:0002830)	9	1	0.49	+	2.06	0.409	1
regulation of type 2 immune response (GO:0002828)	18	2	0.97	+	2.06	0.274	1
negative regulation of translational initiation (GO:0045947)	18	2	0.97	+	2.06	0.274	1
positive regulation of transcription by RNA polymerase III (GO:0045945)	9	1	0.49	+	2.06	0.409	1
muscle hypertrophy in response to stress (GO:0003299)	9	1	0.49	+	2.06	0.409	1
embryonic placenta morphogenesis (GO:0060669)	18	2	0.97	+	2.06	0.274	1
amino sugar catabolic process (GO:0046348)	9	1	0.49	+	2.06	0.409	1
regulation of glial cell apoptotic process (GO:0034350)	9	1	0.49	+	2.06	0.409	1
negative regulation of muscle adaptation (GO:0014745)	9	1	0.49	+	2.06	0.409	1
eyelid development in camera-type eye (GO:0061029)	9	1	0.49	+	2.06	0.409	1
regulation of dendritic spine morphogenesis (GO:0061001)	36	4	1.95	+	2.06	0.147	1
apoptotic process involved in morphogenesis (GO:0060561)	9	1	0.49	+	2.06	0.409	1
secondary heart field specification (GO:0003139)	9	1	0.49	+	2.06	0.409	1
positive regulation of cation transmembrane transport (GO:1904064)	100	11	5.41	+	2.03	0.0298	1
DNA-templated transcription, elongation (GO:0006354)	82	9	4.43	+	2.03	0.0516	1
nucleosome assembly (GO:0006334)	64	7	3.46	+	2.02	0.0946	1
cellular response to alcohol (GO:0097306)	64	7	3.46	+	2.02	0.0946	1
regulation of cell cycle arrest (GO:0071156)	101	11	5.46	+	2.01	0.0477	1
maternal process involved in female pregnancy (GO:0060135)	46	5	2.49	+	2.01	0.187	1
response to testosterone (GO:0033574)	37	4	2	+	2	0.157	1
phospholipase C-activating G protein-coupled receptor signaling pathway (GO:0007200)	37	4	2	+	2	0.157	1
positive regulation of mitotic cell cycle phase transition (GO:1901992)	74	8	4	+	2	0.0719	1
negative regulation of calcium ion transport (GO:0051926)	37	4	2	+	2	0.157	1
endocytic recycling (GO:0032456)	37	4	2	+	2	0.157	1
ncRNA 3'-end processing (GO:0043628)	37	4	2	+	2	0.157	1
centromere complex assembly (GO:0034508)	37	4	2	+	2	0.157	1
positive regulation of calcium ion transport into cytosol (GO:0010524)	37	4	2	+	2	0.157	1
negative regulation of calcium ion transmembrane transport (GO:1903170)	28	3	1.51	+	1.98	0.211	1
mitotic chromosome condensation (GO:0007076)	28	3	1.51	+	1.98	0.211	1
cytoplasmic translational initiation (GO:0002183)	28	3	1.51	+	1.98	0.211	1
positive regulation of organelle assembly (GO:1902117)	56	6	3.03	+	1.98	0.135	1
response to electrical stimulus (GO:0051602)	28	3	1.51	+	1.98	0.211	1
exocytic process (GO:0140029)	56	6	3.03	+	1.98	0.135	1
oocyte development (GO:0048599)	28	3	1.51	+	1.98	0.211	1
posttranscriptional gene silencing (GO:0016441)	56	6	3.03	+	1.98	0.135	1
response to pH (GO:0009268)	28	3	1.51	+	1.98	0.211	1
positive regulation of G1/S transition of mitotic cell cycle (GO:1900087)	28	3	1.51	+	1.98	0.211	1
female gonad development (GO:0008585)	56	6	3.03	+	1.98	0.135	1
chromatin assembly (GO:0031497)	94	10	5.08	+	1.97	0.0447	1
histone deacetylation (GO:0016575)	47	5	2.54	+	1.97	0.191	1
tRNA aminoacylation (GO:0043039)	47	5	2.54	+	1.97	0.191	1
response to gamma radiation (GO:0010332)	47	5	2.54	+	1.97	0.191	1
body fluid secretion (GO:0007589)	47	5	2.54	+	1.97	0.191	1
DNA duplex unwinding (GO:0032508)	104	11	5.62	+	1.96	0.0505	1
ATP metabolic process (GO:0046034)	161	17	8.7	+	1.95	0.0147	1
nucleobase biosynthetic process (GO:0046112)	19	2	1.03	+	1.95	0.293	1
regulation of glial cell proliferation (GO:0060251)	19	2	1.03	+	1.95	0.293	1
viral translation (GO:0019081)	19	2	1.03	+	1.95	0.293	1
glycoprotein catabolic process (GO:0006516)	19	2	1.03	+	1.95	0.293	1
tRNA wobble base modification (GO:0002097)	19	2	1.03	+	1.95	0.293	1
regulation of translational elongation (GO:0006448)	19	2	1.03	+	1.95	0.293	1
DNA replication-independent nucleosome assembly (GO:0006336)	38	4	2.05	+	1.95	0.167	1
response to cholesterol (GO:0070723)	19	2	1.03	+	1.95	0.293	1
actin filament-based transport (GO:0099515)	19	2	1.03	+	1.95	0.293	1
organelle membrane fusion (GO:0090174)	76	8	4.11	+	1.95	0.0777	1
regulation of lipid catabolic process (GO:0050994)	38	4	2.05	+	1.95	0.167	1
sulfur compound catabolic process (GO:0044273)	38	4	2.05	+	1.95	0.167	1
glucose 6-phosphate metabolic process (GO:0051156)	19	2	1.03	+	1.95	0.293	1
regulation of vascular endothelial growth factor receptor signaling pathway (GO:0030947)	19	2	1.03	+	1.95	0.293	1
negative regulation of CD4-positive, alpha-beta T cell differentiation (GO:0043371)	19	2	1.03	+	1.95	0.293	1
regulation of long-term neuronal synaptic plasticity (GO:0048169)	19	2	1.03	+	1.95	0.293	1
regulation of hair cycle (GO:0042634)	19	2	1.03	+	1.95	0.293	1
granulocyte migration (GO:0097530)	38	4	2.05	+	1.95	0.167	1
natural killer cell mediated cytotoxicity (GO:0042267)	19	2	1.03	+	1.95	0.293	1
cardiac conduction (GO:0061337)	57	6	3.08	+	1.95	0.139	1
C21-steroid hormone metabolic process (GO:0008207)	19	2	1.03	+	1.95	0.293	1
positive regulation of receptor signaling pathway via JAK-STAT (GO:0046427)	19	2	1.03	+	1.95	0.293	1
peptide hormone secretion (GO:0030072)	38	4	2.05	+	1.95	0.167	1
ncRNA export from nucleus (GO:0097064)	38	4	2.05	+	1.95	0.167	1
negative regulation of dephosphorylation (GO:0035305)	86	9	4.65	+	1.94	0.0612	1
mitotic metaphase plate congression (GO:0007080)	48	5	2.6	+	1.93	0.195	1
regulation of receptor signaling pathway via STAT (GO:1904892)	48	5	2.6	+	1.93	0.195	1
amino acid activation (GO:0043038)	48	5	2.6	+	1.93	0.195	1
regulation of substrate adhesion-dependent cell spreading (GO:1900024)	48	5	2.6	+	1.93	0.195	1
CENP-A containing nucleosome assembly (GO:0034080)	29	3	1.57	+	1.91	0.225	1
regulation of response to wounding (GO:1903034)	116	12	6.27	+	1.91	0.0407	1
negative regulation of endothelial cell proliferation (GO:0001937)	29	3	1.57	+	1.91	0.225	1
porphyrin-containing compound biosynthetic process (GO:0006779)	29	3	1.57	+	1.91	0.225	1
nuclear membrane organization (GO:0071763)	58	6	3.14	+	1.91	0.143	1
regulation of viral release from host cell (GO:1902186)	29	3	1.57	+	1.91	0.225	1
biological process involved in interaction with symbiont (GO:0051702)	58	6	3.14	+	1.91	0.143	1
tetrapyrrole biosynthetic process (GO:0033014)	29	3	1.57	+	1.91	0.225	1
nucleotide-excision repair, preincision complex assembly (GO:0006294)	29	3	1.57	+	1.91	0.225	1
endosome transport via multivesicular body sorting pathway (GO:0032509)	29	3	1.57	+	1.91	0.225	1
oocyte differentiation (GO:0009994)	29	3	1.57	+	1.91	0.225	1
G1/S transition of mitotic cell cycle (GO:0000082)	116	12	6.27	+	1.91	0.0407	1
hexose transmembrane transport (GO:0008645)	29	3	1.57	+	1.91	0.225	1
CENP-A containing chromatin organization (GO:0061641)	29	3	1.57	+	1.91	0.225	1
regulation of androgen receptor signaling pathway (GO:0060765)	29	3	1.57	+	1.91	0.225	1
diol metabolic process (GO:0034311)	29	3	1.57	+	1.91	0.225	1
mitochondrial respiratory chain complex assembly (GO:0033108)	87	9	4.7	+	1.91	0.0639	1
transcription elongation from RNA polymerase II promoter (GO:0006368)	68	7	3.68	+	1.9	0.108	1
positive regulation of ion transmembrane transporter activity (GO:0032414)	68	7	3.68	+	1.9	0.108	1
regulation of calcium ion transport into cytosol (GO:0010522)	68	7	3.68	+	1.9	0.108	1
protein-DNA complex assembly (GO:0065004)	185	19	10	+	1.9	0.0148	1
positive regulation of DNA replication (GO:0045740)	39	4	2.11	+	1.9	0.281	1
positive regulation of gliogenesis (GO:0014015)	39	4	2.11	+	1.9	0.281	1
calcium ion transmembrane import into cytosol (GO:0097553)	39	4	2.11	+	1.9	0.281	1
DNA replication-independent nucleosome organization (GO:0034724)	39	4	2.11	+	1.9	0.281	1
response to ischemia (GO:0002931)	39	4	2.11	+	1.9	0.281	1
ribonucleoside triphosphate metabolic process (GO:0009199)	49	5	2.65	+	1.89	0.2	1
cell cycle G1/S phase transition (GO:0044843)	118	12	6.38	+	1.88	0.0433	1
development of primary female sexual characteristics (GO:0046545)	59	6	3.19	+	1.88	0.148	1
[truncated: 12,727 more rows]
